# Supplementary material
Source: publisher figshare collection journal article supplement (https://gsapubs.figshare.com/articles/dataset/_/25505017)
Supplement: Supplementary file 1 [file 1]

Kulutingwak Fiord fault zone (KFFZ) and Emma Fiord fault zone (EFFZ)

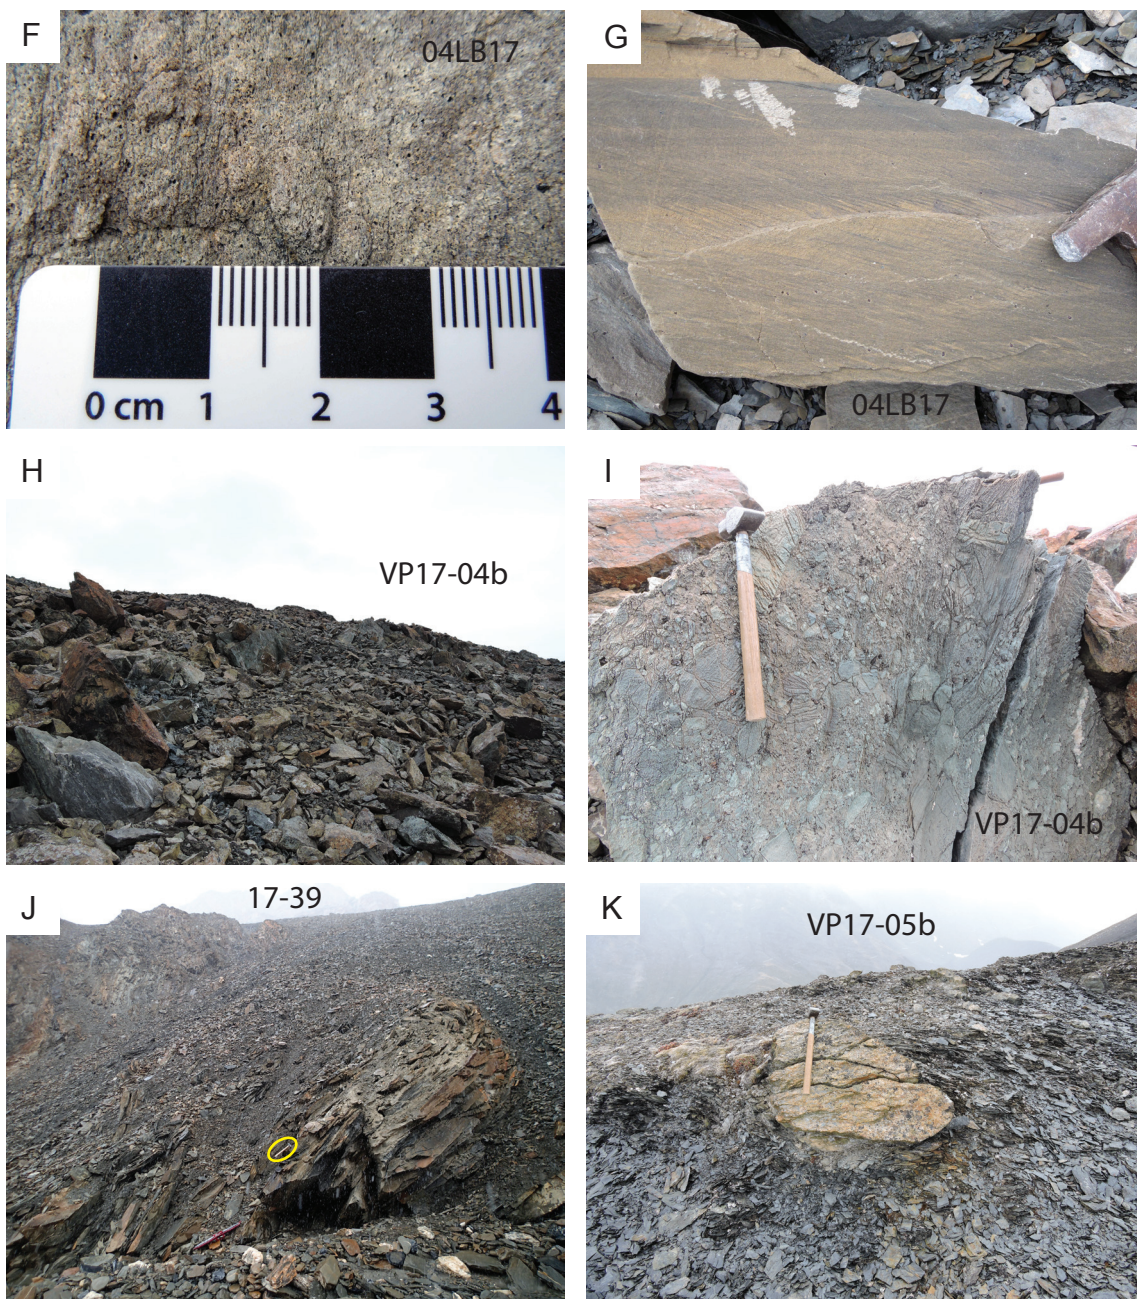

Supplemental File S7 (continued). KFFZ: F) Coarse grained sandstone collected at sample 04LB17; (G) Cross bedded sandstone at sample 04LB17 locality; H) Subcrop of mixed metacarbonate and metavolcanic rocks of the Kulutingwak Formation at sample locality VP17-04b; I) Metacarbonate breccia at sample VP17-04b locality; J) Interlayered sandstone (17-39) and siltstone of the Danish River Formation. EFFZ: K) Boudin of volcanoclastic sandstone in shale collected at sample VP17-05b locality.
