# Supplementary material
Source: publisher figshare collection journal article supplement (https://gsapubs.figshare.com/articles/dataset/_/25505017)
Supplement: Supplementary file 1 [file 1]

## Sheet: S4a U-Pb ICPMS data
Supplemental Item 4a. Table of U-Pb isotopic data from the Arizona LaserChron Center.
							Isotope Ratios					Apparent Ages (Ma)
																		Cut-off =	1200				"Best Age"	± 2σ
Sample	Analysis	U	206Pb	Th/U	206Pb*	± 2σ	207Pb*	± 2σ	206Pb*	± 2σ	error	206Pb*	± 2σ	207Pb*	± 2σ	206Pb*	± 2σ	"Best Age"	± 2σ	disc.	± 2σ		(Ma)	(Ma)
		(ppm)	204Pb		207Pb*	(%)	235U*	(%)	238U	(%)	corr.	238U*	(Ma)	235U	(Ma)	207Pb*	(Ma)	(Ma)	(Ma)	%	disc.		with systematic uncertainty
Sample 17-02			(Analyzed July_23_2020; 600/hr; 30 µm spot)
			Systematic errors (2σ): 206Pb/238U=	0.701779
			206Pb/207Pb=	0.828254
17-02	459	788.027	40626.7	0.120699	17.6885	2.2577	0.556991	2.73879	0.0714871	1.55041	0.566094	445.109	6.66816	449.566	9.94842	473.411	49.9457	445.109	6.66816	5.97838	10.019		445.109	7.3153
17-02	299	822.928	15567.7	0.432128	17.899	2.53132	0.581117	2.99571	0.0754712	1.60209	0.534793	469.034	7.24747	465.179	11.1798	447.141	56.2785	469.034	7.24747	-4.89622	13.3017		469.034	7.90745
17-02	447	378.363	5934.19	0.454596	17.4867	5.02782	0.612208	5.3868	0.0776775	1.93355	0.358942	482.245	8.98421	484.952	20.7708	498.698	110.786	482.245	8.98421	3.29922	21.5575		482.245	9.55059
17-02	135	344.971	24418.4	0.613905	18.5816	4.37127	0.577992	4.719	0.0779278	1.77789	0.376752	483.742	8.28564	463.17	17.5512	363.365	98.5476	483.742	8.28564	-33.1285	36.1775		483.742	8.90162
17-02	430	256.02	10007.7	0.676092	18.171	7.33906	0.596931	7.65335	0.078703	2.1707	0.283628	488.376	10.2096	475.284	29.0502	413.528	164.089	488.376	10.2096	-18.0999	46.9273		488.376	10.721
17-02	553	93.7972	8393.75	0.692693	16.1555	11.0976	0.674783	11.2653	0.0790992	1.93621	0.171874	490.744	9.14918	523.616	46.0948	670.606	237.61	490.744	9.14918	26.8208	25.9649		490.744	9.72427
17-02	501	911.549	61286.3	0.648405	17.3254	2.31952	0.635376	2.65138	0.0798732	1.28438	0.48442	495.366	6.12407	499.439	10.4597	519.085	50.9539	495.366	6.12407	4.5694	9.44157		495.366	6.97484
17-02	143	451.515	15778.3	0.87866	17.7977	3.52475	0.618555	3.79267	0.0798786	1.40018	0.36918	495.398	6.67662	488.941	14.7175	459.776	78.1642	495.398	6.67662	-7.74761	18.3751		495.398	7.46397
17-02	491	534.266	26106	0.537195	17.5562	2.73415	0.629028	3.24567	0.0801287	1.74894	0.538854	496.891	8.36384	495.49	12.7257	489.98	60.3035	496.891	8.36384	-1.41038	12.5971		496.891	9.00576
17-02	126	377.381	22423.9	0.691412	18.0973	3.77	0.610268	4.09358	0.0801349	1.59515	0.389672	496.928	7.62895	483.729	15.7531	422.612	84.1711	496.928	7.62895	-17.5849	23.4887		496.928	8.32922
17-02	478	1508	39627.3	0.687205	17.4935	1.55701	0.631589	2.07488	0.0801677	1.37144	0.660974	497.124	6.56152	497.085	8.15548	497.851	34.3003	497.124	6.56152	0.146221	7.0047		497.124	7.36647
17-02	58	465.514	13015.1	0.451317	17.2191	2.75784	0.642711	3.21405	0.0802997	1.65058	0.513551	497.911	7.90904	503.983	12.7686	532.614	60.3959	497.911	7.90904	6.51558	10.7042		497.911	8.5885
17-02	580	1147.88	9840.7	0.772645	17.2378	2.49535	0.64348	2.75783	0.0804832	1.17426	0.425791	499.006	5.63858	504.458	10.9641	530.236	54.6696	499.006	5.63858	5.88981	9.76126		499.006	6.56547
17-02	113	678.809	5134.6	0.80059	16.7209	3.31501	0.663925	3.62234	0.0805504	1.46017	0.4031	499.407	7.01686	517.012	14.6761	596.514	71.8359	499.407	7.01686	16.279	10.1506		499.407	7.78052
17-02	422	274.283	20226.3	0.518627	17.9274	3.81746	0.619463	4.07372	0.0805788	1.42205	0.349078	499.577	6.83591	489.511	15.8225	443.621	84.893	499.577	6.83591	-12.6135	21.6052		499.577	7.6185
17-02	100	495.769	49954.3	0.74495	18.1373	3.4734	0.612416	3.69153	0.0805945	1.25015	0.338653	499.671	6.01066	485.082	14.2368	417.686	77.6139	499.671	6.01066	-19.6283	22.2757		499.671	6.88927
17-02	477	396.901	28148.8	0.552149	17.4217	3.28371	0.6382	3.47882	0.0806743	1.14867	0.330189	500.146	5.52781	501.191	13.7613	506.923	72.2301	500.146	5.52781	1.33678	14.1005		500.146	6.47458
17-02	296	328.071	25743.4	0.68819	18.0495	5.21025	0.616438	5.51582	0.0807316	1.81041	0.328222	500.488	8.71809	487.613	21.3593	428.504	116.193	500.488	8.71809	-16.7989	31.7364		500.488	9.3434
17-02	467	709.134	74268.6	0.543475	17.1799	2.09546	0.647993	2.57114	0.0807755	1.4899	0.579473	500.75	7.17829	507.243	10.2654	537.558	45.8918	500.75	7.17829	6.84738	8.06385		500.75	7.92985
17-02	89	516.921	36201.7	1.12302	18.1497	3.65713	0.613381	3.85849	0.0807769	1.23016	0.318819	500.758	5.92694	485.69	14.8953	416.155	81.7166	500.758	5.92694	-20.3299	23.671		500.758	6.81996
17-02	349	313.274	23292.1	0.526627	17.0978	5.20126	0.652063	5.37205	0.0808942	1.34383	0.250151	501.458	6.48329	509.748	21.5303	548.078	113.579	501.458	6.48329	8.50606	18.9972		501.458	7.30997
17-02	411	202.025	15937.5	0.522628	17.5549	5.83119	0.635098	6.08228	0.080896	1.72957	0.284363	501.469	8.3445	499.267	23.9891	490.155	128.651	501.469	8.3445	-2.30812	26.9066		501.469	8.99896
17-02	92	285.202	22981.1	0.761011	17.949	5.84278	0.621191	6.091	0.0809009	1.72111	0.282567	501.498	8.30416	490.594	23.699	440.944	130.029	501.498	8.30416	-13.7328	33.5913		501.498	8.96171
17-02	442	320.96	33733.2	0.668914	17.7764	4.79029	0.627292	4.9588	0.0809096	1.28174	0.258478	501.55	6.18485	494.407	19.4099	462.448	106.186	501.55	6.18485	-8.45549	24.939		501.55	7.04736
17-02	446	684.179	45241.3	0.39895	17.5516	2.50899	0.635482	2.83164	0.0809297	1.3127	0.463583	501.67	6.3357	499.505	11.172	490.562	55.2988	501.67	6.3357	-2.26424	11.5999		501.67	7.18026
17-02	145	226.616	11286.2	0.629262	16.5843	7.0701	0.672714	7.24718	0.0809495	1.59227	0.21971	501.788	7.68679	522.361	29.5964	614.27	152.724	501.788	7.68679	18.3115	20.3485		501.788	8.39479
17-02	388	437.264	27366.8	0.7206	17.6623	3.094	0.632172	3.41277	0.0810161	1.4402	0.422002	502.185	6.95792	497.448	13.4219	476.687	68.4121	502.185	6.95792	-5.34906	15.1896		502.185	7.73537
17-02	395	90.9898	11904.9	0.717638	16.3501	14.3921	0.683135	14.5145	0.0810427	1.88139	0.129621	502.343	9.09219	528.667	59.8337	644.95	309.626	502.343	9.09219	22.1112	37.4192		502.343	9.69683
17-02	424	362.041	22998.5	0.511088	17.8071	4.20272	0.62744	4.41165	0.0810688	1.34157	0.304096	502.499	6.48531	494.5	17.2707	458.6	93.2591	502.499	6.48531	-9.57233	22.327		502.499	7.31488
17-02	455	339.214	31259.7	0.659839	17.4529	5.20636	0.640625	5.39652	0.0811256	1.41996	0.263124	502.838	6.86871	502.693	21.3971	502.987	114.61	502.838	6.86871	0.0296419	22.82		502.838	7.65724
17-02	351	487.826	15884.7	0.735738	17.5541	4.05131	0.63725	4.2702	0.0811666	1.34964	0.316061	503.082	6.53163	500.602	16.8765	490.263	89.3913	503.082	6.53163	-2.61463	18.7574		503.082	7.35766
17-02	308	518.129	54203	0.723531	17.7434	2.72591	0.630707	3.06669	0.0811995	1.40499	0.458146	503.278	6.80205	496.536	12.0436	466.518	60.3976	503.278	6.80205	-7.87961	14.0425		503.278	7.59889
17-02	207	550.443	31401.3	0.551467	17.9632	3.42328	0.623147	3.86075	0.0812197	1.78509	0.462369	503.399	8.64423	491.818	15.0502	439.188	76.1851	503.399	8.64423	-14.6203	19.9801		503.399	9.28156
17-02	256	351.552	22135.6	0.667849	17.4993	4.46622	0.639724	4.83594	0.081227	1.85451	0.383485	503.443	8.98112	502.136	19.1578	497.163	98.4105	503.443	8.98112	-1.26314	20.1257		503.443	9.59552
17-02	361	226.219	20453	0.545624	17.736	6.74029	0.631413	6.92562	0.0812561	1.59148	0.229795	503.616	7.70985	496.976	27.2185	467.463	149.3	503.616	7.70985	-7.73377	34.4479		503.616	8.42065
17-02	303	251.409	27553.4	0.888449	17.7352	6.12217	0.631793	6.30887	0.0813017	1.52345	0.241478	503.888	7.38414	497.212	24.8035	467.561	135.6	503.888	7.38414	-7.76955	31.2948		503.888	8.12481
17-02	281	197.142	13220.8	0.628439	16.1198	7.24325	0.695858	7.45709	0.0813894	1.77297	0.237756	504.411	8.60211	536.314	31.0716	675.355	154.917	504.411	8.60211	25.3118	17.1798		504.411	9.24483
17-02	87	375.294	14878.5	0.567547	17.4114	4.00889	0.644353	4.36041	0.0814039	1.71523	0.393365	504.497	8.32336	504.997	17.3499	508.241	88.1687	504.497	8.32336	0.736709	17.2977		504.497	8.98681
17-02	544	338.118	12408.1	0.782177	17.6079	5.63261	0.638035	5.87666	0.0815153	1.67597	0.285191	505.161	8.14314	501.089	23.2435	483.518	124.41	505.161	8.14314	-4.47614	26.9347		505.161	8.82216
17-02	339	128.555	9685.7	0.541709	16.3657	7.47599	0.687039	7.70271	0.0815838	1.85506	0.240833	505.569	9.02029	531.02	31.8541	642.898	160.761	505.569	9.02029	21.3609	19.7142		505.569	9.63698
17-02	322	474.029	33696.7	0.796713	16.6705	2.97005	0.674577	3.27995	0.0815956	1.39173	0.424312	505.64	6.76821	523.491	13.4162	603.06	64.2846	505.64	6.76821	16.1544	9.0079		505.64	7.57554
17-02	336	387.624	65898.4	0.629909	17.8081	4.47453	0.631713	4.7064	0.0816252	1.45904	0.310011	505.816	7.09794	497.162	18.5015	458.473	99.2951	505.816	7.09794	-10.3263	23.9444		505.816	7.8715
17-02	198	291.606	24880.2	0.656208	18.086	2.99347	0.622289	3.3232	0.0816623	1.44319	0.434278	506.037	7.02381	491.281	12.9436	424.008	66.8367	506.037	7.02381	-19.3462	18.8854		506.037	7.80547
17-02	409	476.174	24359.2	0.485073	17.3117	4.31865	0.650143	4.57111	0.0816652	1.49811	0.327734	506.054	7.29131	508.567	18.2873	520.815	94.8141	506.054	7.29131	2.83406	17.7443		506.054	8.04664
17-02	323	253.673	15090.5	0.524624	16.9921	5.44559	0.662588	5.6066	0.081692	1.334	0.237934	506.214	6.49456	516.196	22.6885	561.583	118.655	506.214	6.49456	9.8594	19.0806		506.214	7.33425
17-02	397	342.549	29866.5	0.582304	18.009	3.44047	0.626318	3.68481	0.0818411	1.31946	0.358082	507.103	6.43463	493.8	14.4093	433.52	76.6625	507.103	6.43463	-16.9732	20.7384		507.103	7.28403
17-02	200	504.863	15562	0.6736	17.7966	3.48192	0.634727	3.88502	0.0819618	1.72327	0.443568	507.822	8.41533	499.036	15.317	459.902	77.2121	507.822	8.41533	-10.4195	18.6282		507.822	9.07998
17-02	520	696.83	40350.5	0.671025	17.1905	2.67192	0.657343	3.03238	0.0819915	1.43394	0.472876	507.999	7.00478	512.987	12.2123	536.251	58.4798	507.999	7.00478	5.26851	10.413		507.999	7.79396
17-02	360	706.78	73663.5	0.539713	17.6033	2.33664	0.643289	2.66872	0.082165	1.28924	0.483095	509.033	6.31026	504.34	10.6079	484.095	51.5859	509.033	6.31026	-5.15135	11.2807		509.033	7.18055
17-02	196	291.902	17969	0.911553	17.5978	4.35492	0.644109	4.75406	0.0822443	1.90676	0.401082	509.505	9.34105	504.847	18.9119	484.781	96.162	509.505	9.34105	-5.09997	20.9367		509.505	9.94595
17-02	440	2203.56	9154.31	0.3893	17.664	1.50179	0.642516	2.02602	0.0823496	1.35991	0.671226	510.132	6.66997	503.863	8.04729	476.472	33.2131	510.132	6.66997	-7.0644	7.59321		510.132	7.50136
17-02	311	656.115	34459.3	1.1377	17.7997	3.21487	0.638204	3.53941	0.0824252	1.48057	0.418309	510.582	7.26789	501.194	14.001	459.521	71.331	510.582	7.26789	-11.1119	17.3202		510.582	8.03798
17-02	597	386.119	13030.2	0.550375	17.1902	4.57577	0.661381	4.73979	0.0824939	1.23612	0.260795	510.991	6.07258	515.458	19.1595	536.287	100.122	510.991	6.07258	4.71691	17.8249		510.991	6.97921
17-02	373	246.366	8184.05	0.509454	17.0358	6.64617	0.669722	6.77197	0.0827835	1.2992	0.19185	512.716	6.40319	520.543	27.5817	556.008	144.961	512.716	6.40319	7.78623	24.0693		512.716	7.27352
17-02	419	2050.27	2374.49	0.914302	17.2264	9.47168	0.664684	9.5944	0.0830801	1.52967	0.159434	514.481	7.56401	517.475	38.9031	531.691	207.598	514.481	7.56401	3.23685	37.8077		514.481	8.31669
17-02	102	1185.38	74056.4	0.796226	17.5059	1.81641	0.654499	2.28256	0.0831347	1.38228	0.605586	514.806	6.83936	511.244	9.16848	496.283	40.0046	514.806	6.83936	-3.7325	8.47454		514.806	7.66576
17-02	62	227.41	24972.9	0.761354	19.1338	6.23942	0.60052	6.36806	0.0833711	1.2735	0.199982	516.213	6.31765	477.564	24.2619	296.977	142.402	516.213	6.31765	-73.8228	83.3764		516.213	7.20936
17-02	278	238.167	13968.3	0.6383	17.786	5.78196	0.646901	6.05985	0.0834842	1.81405	0.299355	516.886	9.01049	506.57	24.1703	461.201	128.202	516.886	9.01049	-12.074	31.2149		516.886	9.65401
17-02	153	1090.18	2507.38	0.642631	17.2657	4.72086	0.666959	4.9715	0.0835546	1.55861	0.313509	517.305	7.74775	518.862	20.1979	526.7	103.478	517.305	7.74775	1.78375	19.352		517.305	8.4913
17-02	480	513.024	35549.6	1.15365	17.6354	2.72845	0.653779	3.01063	0.0836572	1.27257	0.422692	517.915	6.33302	510.801	12.085	480.025	60.3288	517.915	6.33302	-7.89335	13.6239		517.915	7.22812
17-02	364	188.153	10398.5	0.778966	17.4378	6.06484	0.661738	6.31451	0.0837268	1.75807	0.278418	518.329	8.75588	515.676	25.5338	504.917	133.503	518.329	8.75588	-2.65638	27.1983		518.329	9.4208
17-02	387	147.494	9758.42	0.687233	16.9652	10.5509	0.680264	10.785	0.0837383	2.23475	0.207209	518.398	11.1313	526.934	44.3425	565.016	229.929	518.398	11.1313	8.25076	37.3887		518.398	11.6567
17-02	137	177.5	14986.2	0.913834	17.8636	4.99922	0.646477	5.21074	0.0837934	1.46955	0.282024	518.725	7.32431	506.309	20.7751	451.547	111.025	518.725	7.32431	-14.8774	28.2924		518.725	8.1115
17-02	213	867.955	77251.2	0.645701	17.5135	2.01154	0.659819	2.40829	0.0838466	1.32423	0.549861	519.042	6.60387	514.503	9.7209	495.363	44.319	519.042	6.60387	-4.78012	9.46876		519.042	7.46957
17-02	252	120.097	8891.06	0.778646	15.7197	10.3188	0.73545	10.4329	0.0838851	1.53845	0.147462	519.271	7.67545	559.747	44.8999	728.86	218.839	519.271	7.67545	28.7557	21.4169		519.271	8.43078
17-02	370	268.748	17725.1	0.506876	17.0594	6.04709	0.684283	6.2845	0.0847005	1.71103	0.272262	524.119	8.61295	529.36	25.9266	552.95	131.951	524.119	8.61295	5.21397	22.6724		524.119	9.30254
17-02	129	1267.3	87153.7	0.968284	17.6176	1.86905	0.664642	2.64664	0.0849613	1.87387	0.708017	525.669	9.45941	517.449	10.7299	482.302	41.3037	525.669	9.45941	-8.99158	9.53773		525.669	10.0931
17-02	127	210.715	4912.65	0.491433	17.5523	9.87094	0.669787	10.1994	0.0853019	2.56742	0.251723	527.692	13.0084	520.583	41.547	490.485	217.842	527.692	13.0084	-7.58576	47.8563		527.692	13.4715
17-02	292	121.305	10718.3	0.629162	16.1313	9.87837	0.73003	10.0206	0.0854471	1.68223	0.167877	528.554	8.53675	556.571	42.9412	673.805	211.344	528.554	8.53675	21.5567	24.637		528.554	9.24317
17-02	514	285.803	19867.7	0.160653	16.3395	4.93881	0.72613	6.17759	0.0860878	3.7109	0.600704	532.358	18.9616	554.279	26.3885	646.336	106.079	532.358	18.9616	17.6344	13.8328		532.358	19.2688
17-02	390	601.89	20437	0.921795	17.9686	3.24685	0.664367	3.61986	0.0866183	1.60041	0.442121	535.506	8.22401	517.282	14.672	438.518	72.3096	535.506	8.22401	-22.1174	20.2238		535.506	8.97368
17-02	98	136.271	8909.19	0.134943	15.2378	6.92123	0.993509	7.5896	0.109846	3.11425	0.410331	671.851	19.8697	700.509	38.4109	794.455	145.218	671.851	19.8697	15.4325	15.6591		671.851	20.3358
17-02	406	361.799	48218.1	0.644864	15.9825	2.5044	0.965837	2.90863	0.112005	1.47923	0.508564	684.38	9.60466	686.316	14.5105	693.615	53.3537	684.38	9.60466	1.33142	7.71499		684.38	10.622
17-02	261	446.579	46672.6	0.262735	15.2049	2.23248	1.07283	3.39698	0.11836	2.56038	0.753721	721.115	17.468	740.13	17.8526	798.991	46.8255	721.115	17.468	9.7468	5.72338		721.115	18.0869
17-02	246	576.937	71496.6	0.180729	14.445	1.37443	1.30155	2.14634	0.136417	1.64855	0.768076	824.367	12.7571	846.406	12.3246	905.522	28.3226	824.367	12.7571	8.96223	3.1769		824.367	13.85
17-02	528	350.155	10316.3	0.295916	14.1839	3.02414	1.32834	4.78124	0.136708	3.70335	0.774559	826.021	28.7117	858.157	27.6988	943.02	61.9572	826.021	28.7117	12.4068	6.51071		826.021	29.1566
17-02	460	315.051	16424.9	0.312882	14.095	2.24063	1.35582	2.92844	0.138662	1.88556	0.64388	837.091	14.802	870.071	17.1134	955.865	45.8142	837.091	14.802	12.4259	4.47393		837.091	15.7747
17-02	215	467.397	31859.9	0.510523	13.9758	2.28485	1.38919	2.79559	0.140872	1.61085	0.576209	849.589	12.8221	884.351	16.5053	973.26	46.5755	849.589	12.8221	12.7068	4.38025		849.589	13.9709
17-02	504	578.823	11783.7	0.457901	14.1543	2.74637	1.37215	4.49796	0.140921	3.56218	0.791953	849.868	28.3631	877.083	26.4198	947.288	56.2199	849.868	28.3631	10.2841	6.1086		849.868	28.8436
17-02	531	381.921	15856.4	0.259602	13.7033	2.92387	1.4631	5.30471	0.145475	4.42616	0.834384	875.549	36.2368	915.289	31.9978	1013.24	59.2383	875.549	36.2368	13.589	6.18971		875.549	36.5853
17-02	567	274.53	2274.23	0.225684	13.683	4.53627	1.4863	5.12172	0.147562	2.37787	0.464272	887.284	19.7109	924.805	31.0908	1016.24	91.9438	887.284	19.7109	12.6897	8.13397		887.284	20.5187
17-02	584	172.674	16249.1	1.36441	14.5291	3.71517	1.4055	4.17266	0.14817	1.89963	0.455255	890.694	15.803	891.262	24.7566	893.55	76.7046	890.694	15.803	0.319575	8.73767		890.694	16.8249
17-02	150	376.68	30721.6	0.637844	13.7339	2.30437	1.51854	2.83754	0.151324	1.65576	0.583519	908.381	14.029	937.89	17.3725	1008.73	46.7216	908.381	14.029	9.94778	4.39674		908.381	15.2191
17-02	96	437.01	23540.8	0.964634	14.2932	2.2212	1.4711	2.62707	0.152566	1.40277	0.533967	915.334	11.9701	918.58	15.8804	927.259	45.6165	915.334	11.9701	1.28605	5.02488		915.334	13.3706
17-02	529	443.721	7047.61	0.215314	13.6412	4.74375	1.54203	9.13179	0.152627	7.80298	0.854485	915.674	66.6079	947.315	56.2612	1022.44	96.0609	915.674	66.6079	10.4426	10.6413		915.674	66.5317
17-02	111	367	35871	0.255534	13.2621	2.23769	1.64077	2.94692	0.157887	1.91756	0.650701	945.025	16.8558	986.008	18.592	1079.27	44.9053	945.025	16.8558	12.4387	3.96381		945.025	17.9242
17-02	157	1246.46	217191	0.153626	13.0799	2.08872	1.66542	5.22543	0.158058	4.78982	0.916636	945.976	42.143	995.444	33.155	1106.95	41.7802	945.976	42.143	14.5418	4.98981		945.976	42.4527
17-02	594	737.675	123144	0.0337757	13.9199	1.2491	1.57118	3.00592	0.15869	2.7341	0.909572	949.492	24.1388	958.893	18.6515	981.425	25.4775	949.492	24.1388	3.2537	3.51527		949.492	24.8732
17-02	59	374.846	54872.9	0.710638	14.1623	1.94835	1.56546	2.35979	0.160865	1.33137	0.564189	961.584	11.8931	956.631	14.6213	946.17	39.8973	961.584	11.8931	-1.62911	4.46596		961.584	13.4302
17-02	149	1532.77	148909	0.163666	13.4555	1.53878	1.65877	2.74422	0.161948	2.27221	0.827997	967.591	20.4152	992.906	17.3846	1050.16	31.0515	967.591	20.4152	7.86256	3.34683		967.591	21.3314
17-02	413	352.924	48531.7	0.784526	14.1913	2.08942	1.57811	2.60289	0.162499	1.55221	0.596341	970.647	13.987	961.627	16.1782	941.968	42.8143	970.647	13.987	-3.04454	4.91332		970.647	15.3319
17-02	396	764.192	110274	0.0588177	14.0502	1.33467	1.60201	2.00493	0.163318	1.49613	0.746226	975.191	13.5401	970.995	12.534	962.419	27.2616	975.191	13.5401	-1.32711	3.19647		975.191	14.9384
17-02	271	420.37	61140.7	0.315932	13.5076	2.07339	1.66979	5.11775	0.163653	4.67894	0.914256	977.048	42.4198	997.104	32.5035	1042.34	41.8776	977.048	42.4198	6.26376	5.54482		977.048	42.752
17-02	407	247.53	44306.5	0.110336	13.8197	2.10868	1.6354	2.59179	0.163987	1.50693	0.581426	978.898	13.6859	983.943	16.3312	996.1	42.8302	978.898	13.6859	1.72695	4.4433		978.898	15.0796
17-02	97	504.634	71220	0.824081	14.0404	1.64076	1.61306	2.05447	0.16433	1.23643	0.601822	980.798	11.2494	975.297	12.8776	963.835	33.4674	980.798	11.2494	-1.75987	3.7212		980.798	12.9221
17-02	165	455.404	55352.2	0.162008	13.0818	2.12659	1.73467	5.226	0.164653	4.77376	0.913462	982.585	43.5065	1021.49	33.6629	1106.69	42.509	982.585	43.5065	11.2142	5.20432		982.585	43.8246
17-02	259	873.837	116632	0.0473476	13.9543	1.73355	1.63509	2.49675	0.165553	1.79682	0.719664	987.563	16.4524	983.824	15.7311	976.397	35.3724	987.563	16.4524	-1.14359	4.03304		987.563	17.6385
17-02	75	290.72	49099	0.561143	13.7102	2.32392	1.66443	2.67316	0.165576	1.32105	0.49419	987.691	12.0975	995.066	16.9561	1012.22	47.0888	987.691	12.0975	2.42335	4.69399		987.691	13.684
17-02	547	601.593	39886.7	0.181891	13.7538	1.65196	1.66113	2.15621	0.165773	1.38574	0.642673	988.779	12.7028	993.806	13.6667	1005.78	33.5178	988.779	12.7028	1.6906	3.51118		988.779	14.2232
17-02	201	603.29	125181	0.527417	13.7992	1.51867	1.66167	2.06064	0.166374	1.3928	0.675904	992.101	12.8072	994.012	13.0626	999.098	30.8079	992.101	12.8072	0.700413	3.31947		992.101	14.3251
17-02	564	774.922	6836.62	0.31766	13.7006	1.56169	1.67765	2.05752	0.166774	1.33959	0.651073	994.31	12.3433	1000.09	13.0896	1013.64	31.6492	994.31	12.3433	1.90741	3.29596		994.31	13.9195
17-02	539	581.878	67831.7	0.364726	13.6353	1.60671	1.68595	2.13464	0.1668	1.40542	0.658385	994.457	12.9516	1003.23	13.6053	1023.32	32.5161	994.457	12.9516	2.8207	3.33719		994.457	14.4603
17-02	171	257.018	9250.02	0.426589	13.3988	2.67555	1.73359	3.43988	0.16854	2.16199	0.628507	1004.06	20.1016	1021.09	22.1515	1058.66	53.879	1004.06	20.1016	5.15775	5.18689		1004.06	21.0995
17-02	270	907.974	6508.21	0.312116	13.1218	2.95859	1.77907	5.49732	0.169386	4.63329	0.842826	1008.73	43.2641	1037.84	35.7372	1100.58	59.1669	1008.73	43.2641	8.34573	6.3033		1008.73	43.6096
17-02	488	291.689	41077.9	0.357816	13.8065	2.27571	1.69401	3.00709	0.169703	1.96565	0.65367	1010.47	18.3839	1006.28	19.2002	998.014	46.1938	1010.47	18.3839	-1.24833	5.03538		1010.47	19.4909
17-02	193	393.036	20202	0.757534	13.8095	2.31438	1.71185	2.83143	0.171527	1.63114	0.576083	1020.52	15.3953	1012.98	18.1488	997.578	47.0224	1020.52	15.3953	-2.29942	5.06298		1020.52	16.738
17-02	56	137.276	21945.2	0.596435	13.6797	3.63626	1.73975	3.87815	0.172683	1.34823	0.347648	1026.88	12.7983	1023.37	25.0065	1016.74	73.7023	1026.88	12.7983	-0.996857	7.42857		1026.88	14.4121
17-02	241	189.816	14378.4	0.653615	12.5169	3.71304	1.9037	4.22951	0.172896	2.02536	0.478865	1028.05	19.2462	1082.38	28.1575	1194.3	73.2993	1028.05	19.2462	13.9205	5.5234		1028.05	20.3367
17-02	403	755.747	137982	0.330355	13.6429	1.49018	1.75556	2.09551	0.173784	1.47327	0.70306	1032.93	14.0612	1029.21	13.556	1022.19	30.1616	1032.93	14.0612	-1.05038	3.28369		1032.93	15.5562
17-02	78	1053.99	21173	0.0226214	13.4383	1.23724	1.78515	1.71154	0.174063	1.18263	0.690972	1034.46	11.3027	1040.06	11.1391	1052.74	24.9648	1034.46	11.3027	1.73689	2.56566		1034.46	13.1295
17-02	301	296.536	44466.6	0.328534	13.9629	2.6299	1.71883	3.02496	0.174139	1.49467	0.494111	1034.88	14.2902	1015.59	19.4184	975.112	53.5762	1034.88	14.2902	-6.12882	6.01244		1034.88	15.7677
17-02	131	216.143	27558	0.325531	13.9077	3.13547	1.73036	3.6491	0.174614	1.86676	0.511567	1037.48	17.8892	1019.89	23.4829	983.203	63.8433	1037.48	17.8892	-5.52089	7.08935		1037.48	19.0833
17-02	542	156.416	18584.9	0.978298	13.4318	3.67072	1.79493	3.96464	0.174932	1.49807	0.377857	1039.23	14.3782	1043.62	25.8543	1053.71	73.9488	1039.23	14.3782	1.37469	7.05467		1039.23	15.8582
17-02	287	910.668	34516.1	0.33779	12.8957	1.11553	1.87452	1.59285	0.175398	1.13699	0.713809	1041.79	10.9374	1072.13	10.5471	1135.22	22.199	1041.79	10.9374	8.23076	2.03681		1041.79	12.8403
17-02	101	389.916	65939.3	0.299376	13.5595	2.07002	1.82199	2.44313	0.179258	1.29765	0.531142	1062.92	12.7158	1053.4	16.0168	1034.58	41.8584	1062.92	12.7158	-2.73875	4.33463		1062.92	14.44
17-02	267	336.41	51858.2	0.469208	13.7279	2.29197	1.80268	2.72727	0.17956	1.47814	0.541986	1064.57	14.5052	1046.43	17.8121	1009.61	46.4414	1064.57	14.5052	-5.44347	5.05863		1064.57	16.037
17-02	433	191.09	33379.4	0.336114	13.6977	2.76535	1.80725	3.07158	0.17962	1.33695	0.435265	1064.9	13.1234	1048.09	20.0791	1014.07	56.043	1064.9	13.1234	-5.01164	5.94602		1064.9	14.8045
17-02	573	553.785	11916.5	0.0158469	13.4019	1.59985	1.85217	2.2961	0.180109	1.64699	0.717297	1067.57	16.204	1064.2	15.1403	1058.2	32.2443	1067.57	16.204	-0.886063	3.43438		1067.57	17.5897
17-02	426	184.477	36638.3	0.542523	13.5031	2.86102	1.84416	3.22472	0.180684	1.48774	0.461356	1070.71	14.6768	1061.35	21.2316	1043	57.7635	1070.71	14.6768	-2.65706	5.85693		1070.71	16.2074
17-02	185	141.926	20333.8	0.730788	13.1916	3.71838	1.90356	3.98788	0.182202	1.44112	0.361375	1078.99	14.3179	1082.33	26.548	1089.95	74.467	1078.99	14.3179	1.0053	6.88987		1078.99	15.9057
17-02	471	258.092	57861.8	0.186971	13.235	2.0345	1.89762	2.51097	0.182231	1.47166	0.586091	1079.15	14.6233	1080.26	16.6974	1083.34	40.8022	1079.15	14.6233	0.387048	3.98718		1079.15	16.1805
17-02	493	417.222	66253.3	0.425695	13.2407	1.86993	1.89859	2.31409	0.182402	1.36322	0.589098	1080.08	13.5566	1080.6	15.3909	1082.49	37.4674	1080.08	13.5566	0.22214	3.67359		1080.08	15.2295
17-02	294	218.37	40519.8	0.879068	13.5292	2.30233	1.86011	2.98402	0.182599	1.89833	0.636166	1081.16	18.8952	1067.02	19.7061	1039.1	46.5194	1081.16	18.8952	-4.04696	5.00041		1081.16	20.1136
17-02	438	145.26	22024.3	0.625199	13.4759	4.64416	1.86825	4.87418	0.182675	1.47967	0.303573	1081.57	14.7332	1069.91	32.2394	1047.11	93.6944	1081.57	14.7332	-3.29093	9.34883		1081.57	16.2857
17-02	536	794.855	156569	0.582207	13.1689	1.3312	1.91568	2.07195	0.183046	1.58773	0.766296	1083.6	15.8363	1086.56	13.8229	1093.41	26.6944	1083.6	15.8363	0.89806	2.81983		1083.6	17.291
17-02	79	711.846	171435	0.228555	13.2198	1.57745	1.92875	2.15943	0.185008	1.47471	0.682918	1094.28	14.8421	1091.11	14.4401	1085.67	31.5859	1094.28	14.8421	-0.792602	3.23542		1094.28	16.416
17-02	423	444.118	90538.2	0.39711	13.1561	1.37798	1.93919	1.89839	0.185112	1.30577	0.687832	1094.84	13.1481	1094.72	12.7178	1095.36	27.5759	1094.84	13.1481	0.0476464	2.78794		1094.84	14.9094
17-02	168	1293.94	263458	0.115993	13.0764	1.41791	1.95131	2.04665	0.185141	1.47591	0.721135	1095	14.8631	1098.9	13.7401	1107.51	28.314	1095	14.8631	1.12922	2.86186		1095	16.4368
17-02	540	808.051	107582	0.365901	13.141	1.32208	1.9464	1.91281	0.185588	1.38237	0.722691	1097.43	13.9495	1097.21	12.8306	1097.64	26.4183	1097.43	13.9495	0.0191175	2.72135		1097.43	15.6251
17-02	182	632.619	151293	1.00623	13.2527	1.37359	1.93499	2.01049	0.186068	1.46811	0.730224	1100.04	14.847	1093.27	13.459	1080.68	27.5573	1100.04	14.847	-1.79106	2.93682		1100.04	16.4351
17-02	318	95.0491	15432.4	0.577568	12.831	5.15362	2.00014	5.52623	0.186213	1.99484	0.360978	1100.83	20.1871	1115.56	37.4134	1145.27	102.427	1100.83	20.1871	3.88014	8.77535		1100.83	21.3644
17-02	178	392.504	51498.1	0.492929	13.3545	1.55125	1.92317	1.98522	0.186351	1.23884	0.62403	1101.58	12.5444	1089.17	13.262	1065.33	31.1661	1101.58	12.5444	-3.40207	3.2461		1101.58	14.4013
17-02	63	121.73	17110.2	0.587108	12.6058	3.4322	2.03819	5.7225	0.186424	4.57897	0.800171	1101.97	46.382	1128.36	38.9851	1180.37	67.8476	1101.97	46.382	6.64175	6.65109		1101.97	46.7534
17-02	275	546.659	132708	0.512671	13.233	1.52031	1.94606	2.14306	0.186854	1.51041	0.704792	1104.31	15.3292	1097.09	14.3743	1083.65	30.4854	1104.31	15.3292	-1.90688	3.19687		1104.31	16.8809
17-02	179	726.906	204738	0.307993	13.1614	1.43928	1.9954	1.95337	0.190555	1.32065	0.67609	1124.38	13.6263	1113.96	13.2128	1094.56	28.816	1124.38	13.6263	-2.72392	2.97713		1124.38	15.4122
17-02	205	95.2329	20400.8	0.549375	12.8004	3.61543	2.06796	4.16841	0.192068	2.07467	0.497714	1132.57	21.5488	1138.26	28.5313	1149.98	71.8374	1132.57	21.5488	1.51422	6.43128		1132.57	22.7081
17-02	162	128.361	12667.9	0.148017	12.8022	4.54531	2.09767	5.24832	0.194854	2.62393	0.499956	1147.62	27.5846	1148.04	36.0909	1149.72	90.2922	1147.62	27.5846	0.182725	8.198		1147.62	28.491
17-02	220	733.906	14971.2	0.413288	12.0521	1.29673	2.23867	1.85742	0.195768	1.32985	0.715966	1152.54	14.0351	1193.24	13.0368	1268.59	25.2766	1152.54	14.0351	9.14796	2.12153		1152.54	15.85
17-02	184	194.731	34172.5	0.201834	12.7707	2.70954	2.23407	3.13815	0.207014	1.58316	0.504489	1212.89	17.5037	1191.8	22.0125	1154.59	53.7701	1154.59	53.7701	-5.04947	5.12175		1154.59	55.2385
17-02	86	1041.81	24185.5	0.354602	12.6453	1.68263	2.16104	2.18916	0.198281	1.40042	0.639705	1166.08	14.9382	1168.61	15.1967	1174.17	33.3117	1166.08	14.9382	0.689246	3.09141		1166.08	16.6873
17-02	173	135.528	7852.55	0.53646	12.7786	3.82171	2.1388	4.179	0.198309	1.69074	0.404579	1166.23	18.0372	1161.44	28.916	1153.35	75.8651	1166.23	18.0372	-1.11679	6.83265		1166.23	19.4997
17-02	457	350.794	53226.8	0.206114	12.5533	1.69087	2.20039	2.22201	0.200422	1.44163	0.648794	1177.59	15.5162	1181.17	15.5125	1188.61	33.3527	1177.59	15.5162	0.926853	3.07126		1177.59	17.2339
17-02	443	653.418	38105.4	0.898543	12.1132	1.31835	2.28181	4.64714	0.200551	4.45622	0.958916	1178.28	47.9877	1206.68	32.811	1258.73	25.7715	1178.28	47.9877	6.39136	4.26704		1178.28	48.3968
17-02	404	155.134	13432.5	0.392284	11.2327	5.56855	2.47336	10.5003	0.201585	8.90214	0.847796	1183.83	96.2772	1264.28	75.9578	1404.7	106.672	1183.83	96.2772	15.724	9.37733		1183.83	95.8579
17-02	320	132.375	38364.1	0.396351	12.617	3.40413	2.20292	3.67582	0.201671	1.38694	0.377313	1184.29	15.0049	1181.97	25.672	1178.6	67.2961	1184.29	15.0049	-0.482828	5.87694		1184.29	16.7945
17-02	418	414.813	58221	0.242666	11.7316	1.60917	2.37406	2.51837	0.202086	1.9372	0.76923	1186.52	20.994	1234.82	17.9928	1320.99	31.1792	1186.52	20.994	10.1795	2.64958		1186.52	22.2905
17-02	309	303.59	48924	0.280945	12.7431	2.18865	2.1868	2.6155	0.202196	1.43201	0.54751	1187.11	15.5261	1176.85	18.2243	1158.88	43.4047	1187.11	15.5261	-2.43589	4.06384		1187.11	17.2671
17-02	221	407.373	77421.8	0.97925	12.5339	1.52348	2.28197	1.96825	0.207531	1.2462	0.63315	1215.65	13.8067	1206.73	13.8961	1191.64	30.0706	1191.64	30.0706	-2.01483	2.82302		1191.64	33.8506
17-02	194	192.403	42763.1	0.59526	12.8834	2.32602	2.18178	2.80311	0.203952	1.5643	0.55806	1196.52	17.0827	1175.25	19.5175	1137.17	46.2766	1196.52	17.0827	-5.21888	4.53771		1196.52	18.6959
17-02	381	411.813	75454.6	0.72618	12.485	1.71414	2.28815	2.2576	0.207281	1.46918	0.65077	1214.32	16.2609	1208.64	15.9522	1199.37	33.7963	1199.37	33.7963	-1.24653	3.15874		1199.37	37.0689
17-02	316	91.0238	12988.2	0.320382	12.3963	3.92675	2.39839	4.33224	0.215725	1.83001	0.422416	1259.24	20.9333	1242.12	31.0472	1213.42	77.2305	1213.42	77.2305	-3.77683	6.82668		1213.42	76.9721
17-02	346	94.8835	18801.1	1.32178	12.3504	4.82194	2.37189	5.0352	0.212551	1.44987	0.287947	1242.39	16.3836	1234.17	35.9678	1220.69	94.7661	1220.69	94.7661	-1.7778	8.0145		1220.69	93.2629
17-02	414	97.2098	23969.6	0.578711	12.3432	4.22441	2.48416	4.48349	0.222483	1.50202	0.335011	1294.98	17.6217	1267.43	32.4612	1221.82	83.0269	1221.82	83.0269	-5.98801	7.34525		1221.82	82.3575
17-02	555	127.748	25361.3	0.182298	12.3281	3.43513	2.31968	3.81315	0.207497	1.6553	0.434104	1215.47	18.3367	1218.33	27.0565	1224.23	67.5074	1224.23	67.5074	0.715617	5.67601		1224.23	67.9048
17-02	180	582.712	112758	0.527704	12.245	1.15422	2.42859	1.71826	0.215775	1.27287	0.740788	1259.51	14.5629	1251.1	12.3584	1237.54	22.6611	1237.54	22.6611	-1.7758	2.2041		1237.54	27.5849
17-02	90	170.477	37596.4	0.444117	12.1954	2.91675	2.4798	3.14649	0.219431	1.18025	0.3751	1278.87	13.6909	1266.16	22.7686	1245.46	57.1533	1245.46	57.1533	-2.68265	4.83857		1245.46	58.2757
17-02	115	166.521	37081.2	0.362634	12.1732	2.53786	2.46863	2.95148	0.218046	1.50682	0.51053	1271.54	17.3886	1262.89	21.3297	1249.03	49.7145	1249.03	49.7145	-1.80257	4.28449		1249.03	51.4002
17-02	290	175.665	31214	0.298011	12.1712	2.26946	2.58544	2.7908	0.228327	1.62422	0.58199	1325.73	19.4628	1296.52	20.4345	1249.33	44.461	1249.33	44.461	-6.1145	4.08509		1249.33	46.591
17-02	177	730.303	197826	0.0947237	12.0944	1.15916	2.48106	1.77649	0.217725	1.3462	0.757789	1269.84	15.5163	1266.52	12.8565	1261.75	22.6264	1261.75	22.6264	-0.641682	2.18391		1261.75	27.582
17-02	223	377.768	73176.7	0.543387	12.0769	1.7257	2.36258	4.07359	0.207029	3.69	0.905835	1212.97	40.7999	1231.36	29.0637	1264.56	33.6983	1264.56	33.6983	4.07976	4.11624		1264.56	36.9418
17-02	577	252.611	60770.1	0.208099	12.0682	2.18424	2.46771	3.69559	0.216085	2.98102	0.806644	1261.16	34.1465	1262.62	26.7048	1265.96	42.6534	1265.96	42.6534	0.379257	4.30596		1265.96	44.9654
17-02	310	143.399	29569.1	0.487408	11.9288	4.0457	2.57538	4.33194	0.222907	1.54854	0.35747	1297.22	18.1958	1293.67	31.6859	1288.62	78.7202	1288.62	78.7202	-0.667466	6.30969		1288.62	78.3526
17-02	572	273.286	74188	0.319101	11.924	1.74814	2.5734	2.26672	0.222648	1.44292	0.636568	1295.85	16.9386	1293.11	16.5753	1289.39	33.9985	1289.39	33.9985	-0.501296	2.95776		1289.39	37.2112
17-02	436	306.915	51134.6	0.434506	11.9122	1.84227	2.56724	2.37304	0.221894	1.49578	0.630323	1291.87	17.5105	1291.36	17.3412	1291.32	35.8417	1291.32	35.8417	-0.0426101	3.09017		1291.32	38.8224
17-02	222	207.231	42449.3	0.335065	11.8904	1.99945	2.70333	2.36007	0.23323	1.25384	0.531275	1351.41	15.2863	1329.37	17.4933	1294.87	38.8849	1294.87	38.8849	-4.36588	3.34906		1294.87	41.5371
17-02	538	294.373	55690.8	0.259754	11.8815	1.814	2.41318	3.29774	0.20804	2.754	0.835117	1218.37	30.5737	1246.53	23.6754	1296.35	35.2726	1296.35	35.2726	6.01554	3.47876		1296.35	38.3056
17-02	268	87.8831	17614.9	0.553826	11.8656	3.95651	2.63053	4.30853	0.226475	1.7057	0.39589	1316	20.3041	1309.21	31.7006	1298.94	76.8717	1298.94	76.8717	-1.31367	6.1962		1298.94	76.6276
17-02	54	569.891	113532	0.276186	11.8517	1.40191	2.6248	1.92957	0.225716	1.32586	0.687127	1312.01	15.7394	1307.61	14.1877	1301.23	27.2386	1301.23	27.2386	-0.828383	2.43267		1301.23	31.332
17-02	154	145.383	33177	0.628829	11.8392	2.95528	2.63758	3.30521	0.226576	1.48013	0.447817	1316.53	17.6254	1311.18	24.3357	1303.28	57.4105	1303.28	57.4105	-1.01708	4.65087		1303.28	58.4988
17-02	262	121.416	21629.9	0.575264	11.7912	3.62398	2.64969	4.08999	0.226694	1.89599	0.463569	1317.15	22.587	1314.56	30.1525	1311.16	70.3244	1311.16	70.3244	-0.456452	5.65668		1311.16	70.4898
17-02	337	183.549	31246.3	0.934939	11.7404	2.29329	2.72707	2.69076	0.232309	1.40749	0.523084	1346.59	17.1046	1335.86	19.9916	1319.53	44.4448	1319.53	44.4448	-2.05093	3.67361		1319.53	46.5528
17-02	304	323.604	66883.3	0.397619	11.7335	1.70114	2.61789	2.17745	0.222877	1.3592	0.624215	1297.06	15.9692	1305.67	15.9986	1320.67	32.9649	1320.67	32.9649	1.7878	2.73344		1320.67	36.2455
17-02	545	206.756	41636.7	0.382515	11.7022	2.08038	2.74641	2.46759	0.233195	1.32703	0.537785	1351.22	16.1766	1341.12	18.3681	1325.84	40.2841	1325.84	40.2841	-1.91434	3.32825		1325.84	42.7703
17-02	170	174.24	45699	0.311487	11.5963	3.07721	2.79615	3.56095	0.235271	1.79197	0.503229	1362.06	22.0017	1354.51	26.6341	1343.43	59.4426	1343.43	59.4426	-1.38743	4.77569		1343.43	60.3563
17-02	391	298.669	55517.4	0.399881	11.5961	1.58304	2.64218	2.11151	0.222312	1.39731	0.661755	1294.08	16.3829	1312.47	15.5537	1343.46	30.5786	1343.46	30.5786	3.67574	2.50876		1343.46	34.1404
17-02	325	277.746	48724.8	0.387903	11.5881	1.72872	2.87022	2.14455	0.241333	1.2691	0.591779	1393.62	15.9053	1374.13	16.1493	1344.79	33.3861	1344.79	33.3861	-3.63125	2.83161		1344.79	36.5922
17-02	345	158.587	34027.4	0.374582	11.5529	2.26928	2.74524	4.14417	0.230122	3.46764	0.836751	1335.14	41.818	1340.8	30.8462	1350.67	43.7895	1350.67	43.7895	1.14957	4.45607		1350.67	45.9307
17-02	264	218.421	59924.4	0.37121	11.4858	1.81247	2.88155	2.49688	0.240146	1.71738	0.687809	1387.45	21.4381	1377.1	18.8218	1361.9	34.9192	1361.9	34.9192	-1.87647	3.04977		1361.9	37.9339
17-02	405	106.364	18420.6	0.38006	11.4212	2.61606	2.94208	3.02822	0.243812	1.52524	0.503675	1406.48	19.2733	1392.81	22.9491	1372.75	50.3266	1372.75	50.3266	-2.45712	4.01001		1372.75	51.907
17-02	313	76.002	13354.5	0.586924	11.3911	5.18334	2.77696	5.57971	0.229522	2.06547	0.370175	1331.99	24.8556	1349.36	41.661	1377.83	99.6597	1377.83	99.6597	3.32655	7.22146		1377.83	97.7076
17-02	233	612.228	22132.2	0.404714	11.3688	1.36626	2.77405	2.00729	0.228832	1.47055	0.732606	1328.37	17.6531	1348.58	14.9814	1381.6	26.2497	1381.6	26.2497	3.85234	2.22927		1381.6	30.4087
17-02	106	70.9853	17177.6	0.340133	11.257	6.18218	2.96393	6.32255	0.242091	1.32487	0.209547	1397.56	16.6463	1398.42	48.0115	1400.55	118.501	1400.55	118.501	0.213637	8.5262		1400.55	115.064
17-02	570	283.382	45132	0.437423	11.1958	1.53409	2.9714	2.39907	0.241381	1.84449	0.768833	1393.87	23.1202	1400.33	18.2265	1411	29.3563	1411	29.3563	1.21382	2.62851		1411	33.018
17-02	65	241.938	65452.2	0.725269	11.1825	1.48387	2.96224	1.84513	0.24035	1.09664	0.594343	1388.52	13.6988	1397.99	14.0069	1413.28	28.3866	1413.28	28.3866	1.75186	2.19858		1413.28	32.1837
17-02	330	661.723	126143	0.252671	11.1028	1.43547	2.72504	2.03293	0.21953	1.43952	0.708101	1279.39	16.7046	1335.31	15.1009	1426.94	27.4098	1426.94	27.4098	10.34	2.08246		1426.94	31.3371
17-02	300	192.243	14154.3	0.447607	11.0936	3.52431	2.69852	4.68071	0.217212	3.08031	0.658086	1267.13	35.435	1328.05	34.6802	1428.53	67.2851	1428.53	67.2851	11.2985	4.85881		1428.53	67.5993
17-02	479	311.482	90277.8	0.408691	11.0853	1.48839	3.0659	2.06787	0.246599	1.43554	0.694212	1420.91	18.3062	1424.21	15.833	1429.96	28.4087	1429.96	28.4087	0.632737	2.35287		1429.96	32.1848
17-02	187	200.692	51112	0.223812	11.0775	2.39027	3.06386	2.86785	0.246263	1.58466	0.55256	1419.18	20.1857	1423.7	21.955	1431.29	45.6155	1431.29	45.6155	0.846289	3.46048		1431.29	47.539
17-02	335	385.114	129071	0.522693	11.0239	1.72576	3.13011	2.31372	0.25037	1.54112	0.666077	1440.38	19.8929	1440.12	17.8053	1440.55	32.8923	1440.55	32.8923	0.0116769	2.6682		1440.55	36.0687
17-02	172	306.898	82323.8	0.565465	11.0094	1.53561	3.1331	2.14525	0.25028	1.49799	0.698284	1439.92	19.3307	1440.86	16.5126	1443.05	29.2582	1443.05	29.2582	0.217065	2.42641		1443.05	32.9001
17-02	354	126.351	29425.9	0.458747	11.0078	2.78313	3.04207	3.06542	0.242973	1.28492	0.419165	1402.13	16.1916	1418.24	23.4264	1443.33	53.0269	1443.33	53.0269	2.8542	3.74122		1443.33	54.3523
17-02	582	210	49092.4	0.841744	10.9968	1.76451	3.02194	2.23745	0.241123	1.37574	0.614871	1392.53	17.2297	1413.17	17.0704	1445.24	33.6097	1445.24	33.6097	3.64715	2.53813		1445.24	36.6968
17-02	272	686.642	154478	0.224037	10.9828	1.36376	3.16164	2.0688	0.251948	1.55567	0.751967	1448.52	20.1819	1447.84	15.959	1447.67	25.9675	1447.67	25.9675	-0.0585095	2.27262		1447.67	30.0978
17-02	132	109.868	23481.3	0.455841	10.8996	2.98311	3.23098	3.5904	0.255525	1.99801	0.556486	1466.91	26.2135	1464.62	27.8415	1462.12	56.6938	1462.12	56.6938	-0.327491	4.28345		1462.12	57.7349
17-02	376	272.531	71965.9	0.345531	10.8322	1.62958	3.27835	2.1368	0.257667	1.38216	0.646837	1477.9	18.2545	1475.93	16.6258	1473.91	30.9199	1473.91	30.9199	-0.270619	2.44103		1473.91	34.3082
17-02	353	205.095	44215.6	0.414272	10.8247	1.96501	3.43203	2.39109	0.269558	1.36236	0.569766	1538.56	18.6471	1511.76	18.8012	1475.22	37.2781	1475.22	37.2781	-4.29323	2.92288		1475.22	39.9372
17-02	347	95.6406	22829.7	0.90038	10.8074	2.79263	3.30749	3.086	0.259363	1.31325	0.425551	1486.58	17.435	1482.82	24.0614	1478.25	52.9585	1478.25	52.9585	-0.563435	3.79084		1478.25	54.265
17-02	77	323	95400	0.463874	10.7935	1.30527	3.36635	1.73592	0.263638	1.14442	0.659257	1508.43	15.3918	1496.6	13.5896	1480.69	24.7437	1480.69	24.7437	-1.87319	1.99467		1480.69	29.0401
17-02	186	619.07	112486	0.580824	10.7107	1.47145	3.36596	2.07139	0.261587	1.4579	0.703826	1497.96	19.487	1496.51	16.2155	1495.27	27.8398	1495.27	27.8398	-0.179758	2.2754		1495.27	31.6287
17-02	331	627.759	183472	0.30709	10.6907	1.40889	3.46551	2.09744	0.268821	1.55379	0.740806	1534.81	21.2214	1519.4	16.5282	1498.8	26.6434	1498.8	26.6434	-2.40252	2.30617		1498.8	30.609
17-02	458	246.149	64102.9	0.381601	10.6779	1.55249	3.22481	4.27734	0.24985	3.98565	0.931806	1437.7	51.362	1463.14	33.1543	1501.07	29.3503	1501.07	29.3503	4.22129	3.90067		1501.07	32.9191
17-02	82	407.895	106709	0.519817	10.6673	1.51502	3.38499	2.15211	0.261999	1.52849	0.710229	1500.06	20.4561	1500.93	16.8692	1502.95	28.6348	1502.95	28.6348	0.192393	2.33847		1502.95	32.3011
17-02	494	267.91	59053.8	0.345493	10.6482	1.57216	3.45723	2.09321	0.267112	1.38197	0.660216	1526.13	18.78	1517.52	16.486	1506.34	29.6983	1506.34	29.6983	-1.31368	2.35461		1506.34	33.2171
17-02	416	279.182	118763	0.564711	10.6413	1.47452	3.47704	2.14178	0.268469	1.55339	0.725278	1533.03	21.194	1522.02	16.8901	1507.56	27.849	1507.56	27.849	-1.68951	2.34632		1507.56	31.626
17-02	453	560.896	134023	0.613575	10.6167	1.35988	3.46193	2.00906	0.266683	1.47887	0.7361	1523.94	20.0713	1518.59	15.828	1511.93	25.6686	1511.93	25.6686	-0.794381	2.16578		1511.93	29.777
17-02	243	98.0385	32357.4	0.278526	10.5895	2.47358	3.46082	2.78686	0.265914	1.28374	0.460641	1520.03	17.3833	1518.33	21.9546	1516.78	46.6642	1516.78	46.6642	-0.214481	3.28926		1516.78	48.4388
17-02	119	251.489	74924.9	0.646592	10.5761	1.58695	3.47794	2.08041	0.266892	1.34525	0.646627	1525.01	18.2692	1522.22	16.4071	1519.16	29.9267	1519.16	29.9267	-0.385073	2.31449		1519.16	33.4049
17-02	306	1433.46	117639	0.542574	10.5661	1.34965	3.35325	2.07108	0.257081	1.57094	0.75851	1474.89	20.7102	1493.55	16.199	1520.94	25.445	1520.94	25.445	3.02803	2.11803		1520.94	29.5828
17-02	83	670.779	131611	0.266114	10.4676	1.63545	3.102	4.16577	0.2356	3.83131	0.919713	1363.78	47.0939	1433.19	31.9895	1538.59	30.7654	1538.59	30.7654	11.3618	3.53696		1538.59	34.1118
17-02	393	263.082	54708.7	0.785968	10.4535	1.31437	3.11936	2.52417	0.236601	2.15496	0.853731	1369	26.5793	1437.48	19.4087	1541.12	24.717	1541.12	24.717	11.1683	2.23703		1541.12	28.9507
17-02	210	380.49	4687.85	0.49657	10.4479	1.69252	3.13267	2.81587	0.237483	2.25044	0.7992	1373.6	27.8407	1440.75	21.6742	1542.13	31.8241	1542.13	31.8241	10.9282	2.57643		1542.13	35.0345
17-02	328	614.082	147107	0.232828	10.4421	1.27677	3.54047	1.90382	0.268247	1.41223	0.741786	1531.9	19.2555	1536.3	15.0739	1543.18	24.0034	1543.18	24.0034	0.730945	1.98523		1543.18	28.3585
17-02	341	105.461	33939.5	0.700798	10.3294	2.51456	3.71827	2.87286	0.27868	1.38935	0.483613	1584.71	19.5198	1575.31	22.989	1563.54	47.1456	1563.54	47.1456	-1.35436	3.30132		1563.54	48.8497
17-02	497	414.379	79953.7	0.750589	10.3105	1.49229	3.16845	3.58226	0.237037	3.25663	0.9091	1371.27	40.2273	1449.5	27.6494	1566.97	27.9645	1566.97	27.9645	12.489	3.00492		1566.97	31.6645
17-02	253	153.154	30792.5	1.05995	10.3057	1.71556	3.70404	2.30695	0.276975	1.54237	0.668573	1576.11	21.5657	1572.24	18.4453	1567.85	32.1452	1567.85	32.1452	-0.526437	2.47789		1567.85	35.2946
17-02	410	77.6952	19594.7	0.588397	10.166	2.59195	3.72789	3.43541	0.27498	2.25473	0.656322	1566.03	31.3482	1577.38	27.5062	1593.38	48.4078	1593.38	48.4078	1.71656	3.57579		1593.38	49.9927
17-02	204	149.491	30946.6	1.21697	10.16	2.00069	3.50745	2.4461	0.258566	1.40735	0.575346	1482.5	18.6388	1528.89	19.3276	1594.49	37.3618	1594.49	37.3618	7.02332	2.47241		1594.49	39.915
17-02	288	198.649	59752	0.538558	10.0521	1.46141	4.01794	1.99279	0.293055	1.3548	0.679852	1656.78	19.7937	1637.83	16.2024	1614.39	27.217	1614.39	27.217	-2.62595	2.12056		1614.39	30.9791
17-02	121	278.636	77588.2	1.1361	10.0287	1.49963	3.82316	2.04665	0.278197	1.39281	0.680528	1582.28	19.5418	1597.63	16.4731	1618.74	27.9132	1618.74	27.9132	2.25273	2.07326		1618.74	31.5695
17-02	537	302.722	80581.3	0.280329	10.0003	1.36144	3.96428	2.14261	0.287651	1.65446	0.772173	1629.78	23.8256	1626.92	17.3736	1624.01	25.3235	1624.01	25.3235	-0.355414	2.14503		1624.01	29.3717
17-02	588	337.789	106046	1.43599	9.97731	1.37199	4.0045	1.94901	0.289901	1.3843	0.710258	1641.03	20.0559	1635.11	15.8358	1628.29	25.5056	1628.29	25.5056	-0.782701	2.00233		1628.29	29.5197
17-02	163	112.944	34170.4	0.449105	9.96529	3.10106	3.91858	4.38722	0.283339	3.10341	0.707375	1608.16	44.1697	1617.53	35.4938	1630.53	57.6397	1630.53	57.6397	1.37213	4.41521		1630.53	58.5156
17-02	398	243.926	69111.5	0.913791	9.95932	1.51301	3.98386	2.01086	0.287886	1.32452	0.658683	1630.96	19.0862	1630.91	16.3215	1631.64	28.1155	1631.64	28.1155	0.0420476	2.08208		1631.64	31.7329
17-02	503	267.981	137945	0.632181	9.95428	1.44075	4.06188	1.88755	0.293376	1.21946	0.646055	1658.38	17.8315	1646.69	15.3799	1632.59	26.7694	1632.59	26.7694	-1.57982	1.99177		1632.59	30.5821
17-02	240	213.375	15019.1	0.723391	9.92456	1.6073	4.03716	3.05753	0.29072	2.60098	0.850679	1645.13	37.7658	1641.71	24.8836	1638.14	29.8463	1638.14	29.8463	-0.426611	2.94327		1638.14	33.2191
17-02	469	299.274	115301	1.0725	9.91433	1.45865	3.84499	2.11678	0.276596	1.53397	0.724674	1574.2	21.4254	1602.22	17.0576	1640.05	27.0793	1640.05	27.0793	4.01556	2.05385		1640.05	30.835
17-02	340	189	47722.3	0.458197	9.9087	1.61565	3.978	2.21501	0.286002	1.51523	0.684075	1621.52	21.7233	1629.72	17.9733	1641.11	29.9899	1641.11	29.9899	1.19363	2.23884		1641.11	33.3411
17-02	401	253.218	58967.7	0.378976	9.85139	1.49932	4.1353	2.11141	0.295592	1.48664	0.704099	1669.41	21.865	1661.31	17.2645	1651.87	27.7886	1651.87	27.7886	-1.06204	2.15464		1651.87	31.4316
17-02	392	130.588	32955.6	0.724415	9.84036	2.21955	4.21931	2.65377	0.301259	1.45469	0.548158	1697.55	21.7102	1677.78	21.7841	1653.94	41.129	1653.94	41.129	-2.63648	2.87005		1653.94	43.2822
17-02	533	247.469	48674.9	0.343083	9.72316	1.61687	4.18907	2.17226	0.295538	1.45066	0.667813	1669.14	21.3328	1671.88	17.8066	1676.11	29.8753	1676.11	29.8753	0.415798	2.18416		1676.11	33.2132
17-02	108	157.883	37425.4	1.5754	9.71547	1.84097	3.93682	2.65893	0.277522	1.91852	0.72154	1578.87	26.8668	1621.28	21.5304	1677.57	34.0103	1677.57	34.0103	5.88375	2.4911		1677.57	36.853
17-02	317	94.3209	22039	1.30516	9.70507	3.17173	4.16731	3.51597	0.293455	1.5173	0.431546	1658.77	22.1913	1667.62	28.7936	1679.55	58.5814	1679.55	58.5814	1.23731	3.68946		1679.55	59.3663
17-02	552	65.581	16119.6	0.718392	9.6709	3.28278	4.21029	3.52942	0.295438	1.29621	0.367259	1668.65	19.0565	1676.03	28.9609	1686.07	60.583	1686.07	60.583	1.03293	3.73134		1686.07	61.2237
17-02	250	231.009	20770.6	0.51706	9.54079	1.34065	4.09118	2.57098	0.283218	2.19377	0.85328	1607.55	31.2126	1652.54	20.9785	1711.02	24.6614	1711.02	24.6614	6.04756	2.27189		1711.02	28.729
17-02	255	281.775	64692.2	0.915369	9.54014	1.53421	4.41482	2.26034	0.305601	1.65992	0.734368	1719.02	25.0467	1715.12	18.7131	1711.15	28.2222	1711.15	28.2222	-0.460457	2.21086		1711.15	31.7505
17-02	202	209.704	44880.6	0.714264	9.47829	1.42885	4.50004	1.98168	0.309481	1.37311	0.692905	1738.15	20.9199	1730.98	16.4635	1723.1	26.2477	1723.1	26.2477	-0.873429	1.95834		1723.1	30.0475
17-02	197	113.333	14981.1	1.0645	9.47458	2.37891	3.71622	7.93199	0.255476	7.56685	0.953966	1466.65	99.262	1574.87	63.4835	1723.82	43.6903	1723.82	43.6903	14.9186	6.14878		1723.82	45.5773
17-02	571	83.7988	24311.1	0.477274	9.424	2.78707	4.06823	3.33521	0.278182	1.83191	0.549263	1582.2	25.7015	1647.96	27.1849	1733.65	51.1287	1733.65	51.1287	8.73587	3.07284		1733.65	52.418
17-02	485	207.977	55014	0.242782	9.40119	1.9972	4.55457	2.73199	0.310684	1.86413	0.682332	1744.07	28.4849	1741	22.747	1738.09	36.6164	1738.09	36.6164	-0.343926	2.67481		1738.09	39.1364
17-02	394	318.367	74474.5	0.497182	9.38088	1.27115	4.65763	1.83991	0.317027	1.33021	0.722973	1775.19	20.6414	1759.66	15.3804	1742.05	23.2919	1742.05	23.2919	-1.90238	1.80563		1742.05	27.5635
17-02	81	320.75	4472.92	0.207504	9.29422	1.57845	4.39362	2.27166	0.296294	1.63368	0.719159	1672.91	24.0716	1711.14	18.79	1759.04	28.8661	1759.04	28.8661	4.89693	2.07564		1759.04	32.2599
17-02	448	472.382	176311	0.167381	9.24019	1.25658	4.70865	2.23918	0.315693	1.85336	0.827695	1768.66	28.6674	1768.78	18.754	1769.7	22.9456	1769.7	22.9456	0.0586914	2.07442		1769.7	27.248
17-02	428	61.2225	17746.3	1.01043	9.20535	3.19696	4.79192	3.62389	0.320065	1.70648	0.470895	1790.05	26.6724	1783.48	30.4456	1776.6	58.337	1776.6	58.337	-0.757063	3.6332		1776.6	59.0829
17-02	578	127.697	1697.87	0.286212	9.16663	8.01484	4.13643	8.2495	0.275121	1.9536	0.236815	1566.74	27.1724	1661.53	67.481	1784.28	146.158	1784.28	146.158	12.1918	7.35221		1784.28	140.075
17-02	344	127.541	44348.8	0.230251	9.1663	1.86711	4.9154	2.22948	0.326919	1.21839	0.546491	1823.43	19.3509	1804.9	18.8114	1784.34	34.0348	1784.34	34.0348	-2.19058	2.23057		1784.34	36.7919
17-02	450	173.416	52077.1	0.815756	9.15693	1.63215	4.56311	2.21745	0.303179	1.50106	0.676931	1707.05	22.5119	1742.56	18.4688	1786.21	29.7444	1786.21	29.7444	4.43154	2.03004		1786.21	33.0041
17-02	332	68.4223	22333.1	1.14271	9.12689	2.88015	5.0405	3.37021	0.333798	1.75015	0.519301	1856.77	28.2351	1826.15	28.5572	1792.2	52.4501	1792.2	52.4501	-3.60282	3.4169		1792.2	53.6138
17-02	599	179.639	25810.6	0.937664	9.12136	1.51923	4.97116	2.14662	0.329007	1.51656	0.706485	1833.57	24.2022	1814.43	18.1466	1793.3	27.662	1793.3	27.662	-2.24531	2.07577		1793.3	31.1938
17-02	600	354.876	112283	0.505084	9.11583	1.23141	4.22776	1.85516	0.279637	1.38753	0.747932	1589.53	19.5465	1679.43	15.234	1794.4	22.4212	1794.4	22.4212	11.4173	1.55296		1794.4	26.7921
17-02	432	113.916	27603.1	0.500154	9.10926	2.44804	4.25929	2.83373	0.28152	1.42729	0.503678	1599.01	20.2122	1685.53	23.3033	1795.72	44.5599	1795.72	44.5599	10.9541	2.4798		1795.72	46.3297
17-02	139	226.251	57653	0.235712	9.10018	1.35701	4.5975	2.32858	0.303571	1.8923	0.812641	1708.99	28.4075	1748.82	19.4206	1797.53	24.6987	1797.53	24.6987	4.92578	2.05039		1797.53	28.6708
17-02	484	448.426	175928	0.289265	9.08747	1.68662	4.87589	2.52706	0.321503	1.88185	0.744678	1797.06	29.5135	1798.1	21.2933	1800.08	30.6884	1800.08	30.6884	0.167359	2.36325		1800.08	33.8138
17-02	338	143.127	40397.1	0.231876	9.07844	1.48849	4.98926	2.03073	0.328651	1.38139	0.680246	1831.84	22.0273	1817.5	17.1773	1801.88	27.0772	1801.88	27.0772	-1.66255	1.9566		1801.88	30.6806
17-02	148	100.786	24808.2	0.416624	9.06267	2.16489	4.73397	3.25842	0.311293	2.43528	0.74738	1747.07	37.2682	1773.27	27.317	1805.05	39.3633	1805.05	39.3633	3.21202	2.9526		1805.05	41.573
17-02	107	99.4528	37694.9	0.307877	9.05585	1.74541	4.90986	2.34798	0.322616	1.57053	0.668885	1802.49	24.6955	1803.95	19.8075	1806.42	31.7297	1806.42	31.7297	0.217186	2.22281		1806.42	34.7275
17-02	384	180.962	40896.4	1.23674	9.05573	1.82291	5.0056	2.40635	0.328902	1.57084	0.652788	1833.06	25.0625	1820.27	20.3659	1806.44	33.1387	1806.44	33.1387	-1.47363	2.32166		1806.44	35.9752
17-02	247	128.058	45018.3	0.339931	9.04623	1.57104	5.05396	2.0897	0.331732	1.37793	0.659391	1846.77	22.1267	1828.41	17.714	1808.35	28.5525	1808.35	28.5525	-2.12467	2.02417		1808.35	31.9475
17-02	161	216.072	64301.8	0.61732	9.04103	1.96317	5.04837	2.66513	0.331174	1.80247	0.676314	1844.07	28.9073	1827.48	22.5881	1809.39	35.676	1809.39	35.676	-1.91666	2.5672		1809.39	38.2393
17-02	431	195.589	59014.4	0.500019	9.03951	1.57008	4.86966	2.18098	0.319398	1.51377	0.69408	1786.79	23.623	1797.02	18.3729	1809.7	28.5304	1809.7	28.5304	1.266	2.03147		1809.7	31.9271
17-02	565	88.4313	36038	0.978265	9.03823	2.70351	4.77858	4.36556	0.313379	3.4277	0.785169	1757.31	52.7235	1781.14	36.6602	1809.95	49.1292	1809.95	49.1292	2.90833	3.92823		1809.95	50.5254
17-02	289	112.481	44747.5	0.904233	9.03518	1.93159	5.08936	2.30349	0.333648	1.25499	0.544823	1856.04	20.2399	1834.33	19.5489	1810.57	35.097	1810.57	35.097	-2.51126	2.27999		1810.57	37.7191
17-02	452	152.333	60270.7	0.700592	9.02969	1.9699	4.96151	2.64185	0.325068	1.76036	0.666337	1814.43	27.8393	1812.79	22.3261	1811.67	35.7883	1811.67	35.7883	-0.152489	2.50511		1811.67	38.3382
17-02	496	291.308	65938.5	0.562749	9.0233	1.42099	4.88509	2.59424	0.319835	2.17045	0.836643	1788.92	33.9059	1799.69	21.8663	1812.96	25.8106	1812.96	25.8106	1.3257	2.33904		1812.96	29.5941
17-02	307	264.566	101754	1.08938	9.02267	1.47347	5.02539	2.1482	0.328998	1.56322	0.727687	1833.52	24.9463	1823.61	18.1929	1813.09	26.7635	1813.09	26.7635	-1.12706	2.03014		1813.09	30.4044
17-02	277	68.0863	12246	1.28243	9.02066	2.45443	5.25404	2.88997	0.34389	1.52569	0.527927	1905.36	25.1676	1861.43	24.6535	1813.49	44.5826	1813.49	44.5826	-5.06571	2.93215		1813.49	46.3345
17-02	560	160.546	72518	0.417671	9.01963	1.9554	4.39126	2.6125	0.287386	1.7325	0.663159	1628.45	24.9315	1710.7	21.6073	1813.7	35.516	1813.7	35.516	10.2136	2.23179		1813.7	38.0922
17-02	472	292.208	89078.7	0.516445	9.01063	1.40913	4.97011	1.91384	0.324944	1.29504	0.676671	1813.83	20.4745	1814.25	16.1782	1815.51	25.5872	1815.51	25.5872	0.0924791	1.80402		1815.51	29.4025
17-02	152	500.818	10333	0.249801	9.01011	1.39632	4.33502	2.79913	0.283406	2.42598	0.866692	1608.49	34.5344	1700.05	23.0954	1815.62	25.3542	1815.62	25.3542	11.4078	2.26902		1815.62	29.2058
17-02	209	133.524	33397.4	0.0960932	9.00666	2.00776	4.97232	2.49665	0.324946	1.48396	0.59438	1813.84	23.4613	1814.63	21.1066	1816.31	36.4557	1816.31	36.4557	0.136225	2.38455		1816.31	38.9346
17-02	302	131.346	44105.3	0.596314	9.00473	1.64577	5.08946	2.16107	0.33253	1.40059	0.648103	1850.63	22.5312	1834.35	18.3402	1816.7	29.8804	1816.7	29.8804	-1.86783	2.08457		1816.7	33.0944
17-02	230	182.893	46131.6	0.880038	9.00091	1.50029	5.30565	2.14102	0.346508	1.52745	0.713421	1917.9	25.339	1869.77	18.2924	1817.47	27.2361	1817.47	27.2361	-5.52609	2.10822		1817.47	30.8082
17-02	249	110.531	36522.2	0.603765	9.00011	1.94857	5.07586	2.34463	0.331471	1.30399	0.556159	1845.51	20.927	1832.08	19.8894	1817.63	35.375	1817.63	35.375	-1.53388	2.28701		1817.63	37.9661
17-02	169	574.335	197974	0.327789	8.99919	1.44381	4.97613	2.1609	0.324925	1.60777	0.744026	1813.74	25.4176	1815.27	18.2704	1817.81	26.2095	1817.81	26.2095	0.224268	2.00615		1817.81	29.9314
17-02	68	319.059	76638.4	0.406556	8.99492	1.03765	4.99164	1.8005	0.325783	1.47143	0.817231	1817.91	23.3085	1817.91	15.231	1818.67	18.8334	1818.67	18.8334	0.0419766	1.64743		1818.67	23.9239
17-02	176	198.929	54783.1	1.72634	8.98935	1.68271	5.06609	2.15021	0.330437	1.33861	0.62255	1840.5	21.4323	1830.45	18.2342	1819.8	30.5397	1819.8	30.5397	-1.13743	2.06586		1819.8	33.6722
17-02	208	265.717	76705.2	0.315516	8.98621	1.34473	4.9991	1.85234	0.325954	1.27392	0.687733	1818.74	20.1877	1819.17	15.6735	1820.43	24.4029	1820.43	24.4029	0.0929657	1.73878		1820.43	28.4059
17-02	225	308.221	95556.2	0.232263	8.9664	1.43638	5.04832	2.95196	0.328438	2.57893	0.873633	1830.8	41.1028	1827.47	25.0193	1824.44	26.0537	1824.44	26.0537	-0.348956	2.67004		1824.44	29.7921
17-02	235	345.117	108206	0.862193	8.95905	1.57451	5.10743	2.22259	0.332011	1.56869	0.705796	1848.12	25.2058	1837.34	18.8732	1825.93	28.5544	1825.93	28.5544	-1.21553	2.10024		1825.93	31.9359
17-02	109	601.843	101227	0.0796608	8.94598	1.33637	4.68971	1.88425	0.304412	1.32836	0.704979	1713.15	19.9839	1765.4	15.7701	1828.57	24.227	1828.57	24.227	6.31226	1.65383		1828.57	28.2504
17-02	269	93.9763	35281.1	1.23262	8.94536	1.90311	5.32697	2.91553	0.345753	2.20872	0.757573	1914.29	36.5815	1873.2	24.926	1828.7	34.5029	1828.7	34.5029	-4.6802	2.81113		1828.7	37.1758
17-02	245	207.248	61988.6	0.794121	8.94524	1.4641	5.15839	2.45209	0.334807	1.96702	0.802181	1861.64	31.8056	1845.78	20.8559	1828.72	26.5426	1828.72	26.5426	-1.79986	2.28212		1828.72	30.2038
17-02	389	280.075	86190	0.386887	8.93892	1.44148	5.12971	1.93733	0.33271	1.29437	0.668121	1851.5	20.8309	1841.04	16.4625	1830	26.1284	1830	26.1284	-1.17465	1.83914		1830	29.8499
17-02	382	169.684	47485.9	0.870595	8.93007	2.12992	5.06934	2.63743	0.328469	1.55547	0.589766	1830.96	24.7926	1830.99	22.3686	1831.8	38.601	1831.8	38.601	0.0460668	2.50366		1831.8	40.8643
17-02	286	382.788	98440.3	0.532024	8.9289	1.01507	5.16826	1.64324	0.334835	1.29223	0.786395	1861.77	20.896	1847.41	13.9804	1832.04	18.3972	1832.04	18.3972	-1.62313	1.53047		1832.04	23.5703
17-02	105	393.11	93871	0.614046	8.92542	1.27899	4.82564	1.90608	0.312516	1.41327	0.741454	1753.07	21.6926	1789.38	16.0322	1832.74	23.1786	1832.74	23.1786	4.34703	1.69244		1832.74	27.3737
17-02	192	323.908	49421.8	1.14089	8.92072	1.37407	5.45447	1.98299	0.353053	1.42974	0.721006	1949.16	24.0493	1893.46	17.0158	1833.7	24.8988	1833.7	24.8988	-6.29667	1.95021		1833.7	28.8041
17-02	191	404.172	6989.68	0.592603	8.91865	1.56826	5.15822	2.2338	0.3338	1.59073	0.712119	1856.78	25.6632	1845.75	18.999	1834.12	28.4162	1834.12	28.4162	-1.23529	2.10186		1834.12	31.8052
17-02	315	163.052	33983.6	0.432792	8.91577	1.34229	5.20318	1.90357	0.336601	1.34975	0.709064	1870.3	21.9123	1853.14	16.213	1834.7	24.32	1834.7	24.32	-1.94002	1.80342		1834.7	28.3184
17-02	211	467.477	23255.4	0.357762	8.91402	1.4895	4.69588	3.73255	0.303724	3.42248	0.916926	1709.75	51.3989	1766.51	31.2483	1835.06	26.986	1835.06	26.986	6.82878	3.11811		1835.06	30.5731
17-02	164	387.926	116867	0.412654	8.8956	1.66026	4.66038	2.48037	0.300805	1.84276	0.742937	1695.3	27.4701	1760.16	20.7366	1838.81	30.0624	1838.81	30.0624	7.80441	2.12219		1838.81	33.2367
17-02	383	84.0906	25045.2	0.676036	8.89333	2.52792	5.22878	3.06461	0.337406	1.73247	0.565314	1874.18	28.1756	1857.32	26.1232	1839.27	45.77	1839.27	45.77	-1.89793	2.96253		1839.27	47.4149
17-02	257	47.4104	19818.5	1.45605	8.89182	4.14859	5.21896	4.5719	0.336715	1.92132	0.420245	1870.85	31.1991	1855.72	38.9624	1839.58	75.1206	1839.58	75.1206	-1.69992	4.48596		1839.58	74.6966
17-02	155	169.913	60769	0.468085	8.8913	1.76194	5.05211	2.73785	0.325931	2.09557	0.765406	1818.63	33.2068	1828.1	23.2073	1839.68	31.9004	1839.68	31.9004	1.14427	2.48928		1839.68	34.8524
17-02	379	30.436	8795.05	2.74635	8.89046	3.84374	5.23245	4.36313	0.337534	2.0646	0.473192	1874.8	33.5867	1857.92	37.1983	1839.85	69.5966	1839.85	69.5966	-1.89917	4.26499		1839.85	69.5466
17-02	158	158.973	43549.2	0.490925	8.86888	1.7371	5.27666	2.23855	0.339559	1.41194	0.63074	1884.55	23.0722	1865.09	19.1091	1844.25	31.4331	1844.25	31.4331	-2.18491	2.14437		1844.25	34.4358
17-02	203	409.4	147660	0.320581	8.85987	1.27256	5.01044	1.84727	0.3221	1.33902	0.724867	1799.98	21.0297	1821.09	15.6365	1846.09	23.0209	1846.09	23.0209	2.4979	1.66612		1846.09	27.2325
17-02	263	361.285	106174	1.3053	8.85511	1.75493	5.08716	2.66772	0.326856	2.00921	0.753159	1823.13	31.9064	1833.97	22.6385	1847.06	31.745	1847.06	31.745	1.29594	2.4211		1847.06	34.7086
17-02	365	218.282	66574.5	0.337076	8.85246	1.33853	5.28966	1.91174	0.339766	1.36496	0.713985	1885.54	22.3145	1867.2	16.3256	1847.61	24.21	1847.61	24.21	-2.05331	1.80192		1847.61	28.2162
17-02	120	250.044	59677.9	0.757088	8.8479	1.5616	5.05502	2.06539	0.324527	1.35176	0.654481	1811.8	21.3505	1828.59	17.5086	1848.54	28.2423	1848.54	28.2423	1.98735	1.89113		1848.54	31.6443
17-02	359	369.796	90571.2	0.213319	8.84634	1.26724	5.17227	1.80999	0.331996	1.29234	0.714008	1848.05	20.7647	1848.07	15.401	1848.86	22.9169	1848.86	22.9169	0.0437553	1.67226		1848.86	27.144
17-02	122	271.788	111305	0.653445	8.84495	1.29794	5.19403	1.94831	0.33334	1.45302	0.745783	1854.55	23.4173	1851.64	16.5894	1849.14	23.4715	1849.14	23.4715	-0.292589	1.79565		1849.14	27.601
17-02	371	50.6008	14905.5	0.64877	8.8368	4.47999	5.4563	4.73816	0.349849	1.54267	0.325585	1933.88	25.7744	1893.75	40.6642	1850.81	81.0092	1850.81	81.0092	-4.48822	4.78074		1850.81	80.18
17-02	427	108.177	33898	1.57348	8.83379	1.93403	5.31883	2.36967	0.340919	1.36925	0.577824	1891.09	22.4415	1871.89	20.2541	1851.42	34.967	1851.42	34.967	-2.14242	2.27832		1851.42	37.5723
17-02	319	208.888	51430.5	0.510382	8.82426	1.4578	5.19905	2.09948	0.332882	1.51084	0.719626	1852.33	24.3241	1852.46	17.8794	1853.38	26.3493	1853.38	26.3493	0.0561924	1.93427		1853.38	30.0146
17-02	464	105.235	19180.5	1.51419	8.8138	2.30125	5.22566	2.65887	0.334189	1.33185	0.500907	1858.65	21.5054	1856.81	22.6621	1855.52	41.5868	1855.52	41.5868	-0.169069	2.52655		1855.52	43.5677
17-02	500	370.247	75338.8	0.55289	8.80775	1.39873	4.61421	2.3743	0.294883	1.91856	0.808052	1665.89	28.1653	1751.84	19.8147	1856.76	25.2711	1856.76	25.2711	10.2798	1.94734		1856.76	29.1007
17-02	64	62.0711	22584.6	0.677895	8.80377	2.20932	5.35485	2.70172	0.342061	1.55504	0.575575	1896.58	25.55	1877.66	23.1169	1857.57	39.9153	1857.57	39.9153	-2.09979	2.58942		1857.57	42.0422
17-02	454	406.378	165558	0.417778	8.7748	1.32739	4.982	1.91142	0.317197	1.37535	0.719542	1776.02	21.3505	1816.27	16.1641	1863.53	23.9624	1863.53	23.9624	4.69551	1.67763		1863.53	27.9967
17-02	160	86.1146	31660.3	0.424344	8.77324	2.53221	5.24457	3.38156	0.333855	2.24118	0.662765	1857.04	36.1614	1859.89	28.8392	1863.85	45.7151	1863.85	45.7151	0.365303	3.12028		1863.85	47.3478
17-02	524	116.999	8488.06	0.462986	8.77079	2.2112	5.75098	3.83688	0.365989	3.13564	0.817237	2010.5	54.1588	1939.07	33.1911	1864.35	39.9165	1864.35	39.9165	-7.83921	3.71076		1864.35	42.0381
17-02	591	64.2307	19231.2	0.594602	8.74503	2.71534	5.34525	3.0624	0.33917	1.41607	0.462405	1882.67	23.1198	1876.13	26.196	1869.66	48.9836	1869.66	48.9836	-0.696111	2.91359		1869.66	50.3623
17-02	559	171.955	9705.1	1.241	8.73692	2.02704	5.02386	2.9423	0.318481	2.13267	0.724829	1782.31	33.2087	1823.35	24.9174	1871.33	36.5608	1871.33	36.5608	4.75745	2.57132		1871.33	38.9925
17-02	321	165.82	96496.3	1.07907	8.72978	1.55118	5.41963	2.03723	0.343289	1.32066	0.648262	1902.47	21.7571	1887.96	17.4639	1872.81	27.9756	1872.81	27.9756	-1.5841	1.91109		1872.81	31.3911
17-02	134	345.12	130726	0.205282	8.71969	1.72665	5.41048	2.56535	0.342314	1.89729	0.739584	1897.79	31.1906	1886.52	21.9856	1874.89	31.1285	1874.89	31.1285	-1.22136	2.3647		1874.89	34.1439
17-02	327	330.887	103605	0.448347	8.71931	1.37631	5.05937	1.95982	0.320086	1.39524	0.711919	1790.15	21.8087	1829.32	16.616	1874.97	24.8152	1874.97	24.8152	4.52393	1.71746		1874.97	28.6949
17-02	510	43.8953	8600.11	0.214745	8.69579	4.71435	5.10211	5.11181	0.321919	1.97623	0.3866	1799.09	31.024	1836.46	43.405	1879.84	84.9548	1879.84	84.9548	4.29544	4.6293		1879.84	83.8368
17-02	138	325.233	98504.1	0.163806	8.67233	1.27876	5.3386	1.8439	0.335932	1.32843	0.720446	1867.07	21.5339	1875.07	15.7692	1884.71	23.0255	1884.71	23.0255	0.935903	1.66439		1884.71	27.1983
17-02	60	161.051	59599.6	0.388789	8.67029	1.56884	5.42375	2.024	0.34121	1.2788	0.631815	1892.49	20.9722	1888.62	17.3525	1885.13	28.2484	1885.13	28.2484	-0.3902	1.87101		1885.13	31.6187
17-02	84	269.323	79870.5	0.29472	8.66953	1.47932	5.37214	2.20646	0.337933	1.6371	0.741958	1876.72	26.6558	1880.42	18.8887	1885.29	26.6356	1885.29	26.6356	0.454655	1.99424		1885.29	30.2311
17-02	234	170.286	56845.9	0.330273	8.6592	1.73221	5.576	2.3232	0.350339	1.54813	0.666379	1936.22	25.8924	1912.4	20.0029	1887.43	31.1819	1887.43	31.1819	-2.58453	2.18041		1887.43	34.1799
17-02	342	143.992	45269.1	0.633169	8.65113	1.59449	5.49363	1.97324	0.344842	1.16244	0.589105	1909.92	19.2149	1899.6	16.9508	1889.11	28.6965	1889.11	28.6965	-1.10134	1.84206		1889.11	32.0034
17-02	566	180.857	62235.1	0.314392	8.64907	1.64561	5.48427	2.11367	0.344172	1.32648	0.627573	1906.71	21.8948	1898.14	18.1525	1889.54	29.6153	1889.54	29.6153	-0.908538	1.96062		1889.54	32.8033
17-02	429	190.967	59105	0.226094	8.63159	1.42734	5.47607	1.98965	0.342963	1.38616	0.696683	1900.91	22.8199	1896.85	17.0834	1893.18	25.6753	1893.18	25.6753	-0.408239	1.81859		1893.18	29.4095
17-02	195	103.105	29773.5	0.882633	8.6148	1.93771	5.09874	2.36759	0.31871	1.36043	0.574605	1783.43	21.1954	1835.9	20.099	1896.68	34.8432	1896.68	34.8432	5.97114	2.05733		1896.68	37.4319
17-02	374	313.924	78568.3	0.308775	8.61414	1.47618	5.4119	2.09464	0.338259	1.48607	0.709463	1878.29	24.214	1886.74	17.952	1896.82	26.5426	1896.82	26.5426	0.976766	1.88405		1896.82	30.1441
17-02	368	167.497	62863.7	0.397152	8.59998	1.5925	5.57206	2.08588	0.347697	1.34716	0.645849	1923.59	22.4052	1911.79	17.9575	1899.78	28.6243	1899.78	28.6243	-1.25359	1.9283		1899.78	31.9345
17-02	61	102.64	32559.3	1.50034	8.55199	1.98667	5.53937	2.40666	0.343728	1.35837	0.564421	1904.58	22.3996	1906.73	20.7007	1909.83	35.6676	1909.83	35.6676	0.274892	2.20098		1909.83	38.1616
17-02	519	145.11	26605.7	1.3274	8.52775	1.79239	5.62912	2.37912	0.348307	1.56447	0.657581	1926.51	26.053	1920.57	20.5138	1914.93	32.1596	1914.93	32.1596	-0.604971	2.16926		1914.93	35.0242
17-02	399	177.832	56837.7	0.291341	8.527	1.4849	5.5659	2.07116	0.344365	1.44388	0.697135	1907.64	23.8425	1910.84	17.8278	1915.08	26.6411	1915.08	26.6411	0.388878	1.86284		1915.08	30.2107
17-02	417	83.1053	31367.5	0.453598	8.51443	2.44199	5.73302	2.78836	0.354182	1.34596	0.482707	1954.54	22.6934	1936.36	24.1086	1917.73	43.8027	1917.73	43.8027	-1.91936	2.61143		1917.73	45.5565
17-02	437	46.414	14468.3	0.246606	8.50937	4.38012	5.63882	4.60983	0.348156	1.43703	0.311731	1925.79	23.9231	1922.05	39.762	1918.8	78.5635	1918.8	78.5635	-0.364199	4.2943		1918.8	77.8707
17-02	67	504.06	192068	0.648591	8.5043	1.03515	5.49657	1.54307	0.339171	1.14434	0.7416	1882.68	18.6834	1900.06	13.2565	1919.86	18.5602	1919.86	18.5602	1.93687	1.3586		1919.86	23.5979
17-02	386	140.941	4896.95	0.596328	8.48513	3.15211	5.64246	3.44465	0.347388	1.38918	0.403287	1922.11	23.0887	1922.61	29.7129	1923.91	56.5014	1923.91	56.5014	0.0934095	3.17		1923.91	57.3017
17-02	291	97.2037	25142.9	0.470195	8.45685	2.38038	5.60919	2.84649	0.344188	1.56087	0.548348	1906.79	25.7644	1917.51	24.5308	1929.89	42.6357	1929.89	42.6357	1.19704	2.55868		1929.89	44.4818
17-02	543	173.31	51051.5	0.129359	8.44714	1.70641	5.50741	2.41772	0.337555	1.71276	0.70842	1874.9	27.8644	1901.75	20.7774	1931.95	30.555	1931.95	30.555	2.95297	2.10618		1931.95	33.5966
17-02	408	144.055	47276.7	1.36076	8.41813	1.68666	5.7017	2.25597	0.348263	1.49819	0.664102	1926.3	24.9471	1931.63	19.4893	1938.1	30.1793	1938.1	30.1793	0.609014	2.01299		1938.1	33.2611
17-02	377	105.53	48851.5	0.141655	8.11047	1.79506	6.16633	2.34533	0.362878	1.50941	0.643582	1995.8	25.9078	1999.69	20.4917	2004.46	31.871	2004.46	31.871	0.432225	2.04374		2004.46	34.7049
17-02	333	119.493	47144.8	0.686082	7.86114	1.83821	6.97882	2.42808	0.398066	1.58637	0.653343	2160.13	29.1172	2108.74	21.5651	2059.73	32.4304	2059.73	32.4304	-4.87439	2.17371		2059.73	35.1609
17-02	461	179.586	60947.2	0.862977	7.77348	1.30436	6.89629	1.75095	0.388972	1.1681	0.667126	2118.06	21.0875	2098.18	15.5276	2079.49	22.959	2079.49	22.959	-1.85482	1.51425		2079.49	26.9659
17-02	285	114.875	30137.6	0.209999	7.71802	4.29746	6.31734	6.16259	0.353776	4.41694	0.716734	1952.6	74.4091	2020.86	54.0352	2092.08	75.5491	2092.08	75.5491	6.667	4.89999		2092.08	74.9934
17-02	362	179.125	60362	0.483786	7.69084	1.54404	7.09138	2.01839	0.395724	1.29993	0.644045	2149.32	23.7592	2122.96	17.962	2098.28	27.1209	2098.28	27.1209	-2.43221	1.74213		2098.28	30.4733
17-02	511	32.0312	15570.9	0.551995	7.48609	3.36803	7.40936	3.91083	0.402461	1.9877	0.508255	2180.36	36.7708	2162.1	34.9913	2145.56	58.8563	2145.56	58.8563	-1.6221	3.27234		2145.56	59.3933
17-02	541	320.794	155729	0.37958	7.4092	1.26793	7.43951	1.83572	0.399947	1.32749	0.723143	2168.8	24.4478	2165.73	16.4313	2163.58	22.1132	2163.58	22.1132	-0.241315	1.52529		2163.58	26.1891
17-02	69	170.334	78035.4	0.381893	7.28446	1.44078	7.02436	1.81175	0.371272	1.09845	0.606294	2035.38	19.1721	2114.52	16.104	2193.13	25.0416	2193.13	25.0416	7.19306	1.37373		2193.13	28.6201
17-02	298	146.854	64280.8	1.92494	7.24855	1.66436	7.17772	2.42166	0.377507	1.75907	0.726391	2064.63	31.0766	2133.74	21.5831	2201.72	28.9061	2201.72	28.9061	6.22661	1.87295		2201.72	31.9461
17-02	425	198.146	80089.8	0.52034	7.24267	1.27228	7.47484	2.00408	0.392815	1.54843	0.772639	2135.87	28.1517	2169.98	17.9484	2203.13	22.093	2203.13	22.093	3.05305	1.60559		2203.13	26.1382
17-02	305	154.603	73951.8	0.314873	7.16282	1.76841	7.65445	2.58527	0.397819	1.88583	0.729451	2158.99	34.5985	2191.27	23.2183	2222.36	30.6395	2222.36	30.6395	2.85149	2.0537		2222.36	33.46
17-02	91	244.98	79784.5	0.645034	7.11217	1.20792	7.35712	1.90216	0.379662	1.46941	0.772492	2074.71	26.0666	2155.77	17.0035	2234.65	20.899	2234.65	20.899	7.15733	1.45416		2234.65	25.1403
17-02	99	80.2395	32166.5	0.216554	7.01281	1.66955	8.29751	2.67547	0.422209	2.09063	0.781407	2270.5	40.0093	2264.05	24.2455	2258.96	28.8122	2258.96	28.8122	-0.510741	2.18641		2258.96	31.8262
17-02	507	158.051	51062.6	0.55153	6.96158	1.95885	6.95105	7.21132	0.351112	6.94018	0.9624	1939.91	116.267	2105.2	64.0346	2271.6	33.7601	2271.6	33.7601	14.6018	5.27328		2271.6	36.2155
17-02	295	33.3876	15857.2	0.434772	6.75697	3.70186	8.97467	4.14797	0.440006	1.87133	0.451142	2350.67	36.8606	2335.43	37.8997	2322.88	63.4578	2322.88	63.4578	-1.19632	3.1876		2322.88	63.622
17-02	125	27.4691	9010.3	0.936029	6.6609	4.66507	8.63356	5.13981	0.417263	2.15749	0.419761	2248.04	40.9476	2300.1	46.7797	2347.39	79.7707	2347.39	79.7707	4.23223	3.69247		2347.39	78.8394
17-02	293	174.603	49219.4	1.16866	6.65096	1.27565	9.06401	1.9991	0.437414	1.53918	0.769941	2339.05	30.194	2344.48	18.282	2349.94	21.8022	2349.94	21.8022	0.463384	1.58232		2349.94	25.7826
17-02	324	412.896	200753	0.375122	6.62278	1.41563	8.41973	1.88006	0.404601	1.23718	0.658056	2190.19	22.9735	2277.31	17.0636	2357.2	24.182	2357.2	24.182	7.08512	1.36325		2357.2	27.7603
17-02	183	231.403	93263.8	0.485491	6.37454	1.20377	9.47548	1.88066	0.438266	1.44493	0.768308	2342.87	28.3834	2385.17	17.2734	2422.23	20.42	2422.23	20.42	3.27618	1.42757		2422.23	24.5913
17-02	367	92.833	48739.2	1.05983	6.26449	1.47509	10.2817	1.97014	0.467346	1.30597	0.662881	2471.91	26.8137	2460.46	18.2318	2451.73	24.9543	2451.73	24.9543	-0.823104	1.49973		2451.73	28.348
17-02	474	419.221	206128	0.243986	6.25645	1.5892	9.70756	2.65925	0.440682	2.13216	0.801787	2353.69	42.0432	2407.42	24.4811	2453.9	26.8731	2453.9	26.8731	4.0837	2.00967		2453.9	30.0048
17-02	219	147.086	44272.4	0.709851	6.19174	1.12291	9.38662	1.87531	0.421706	1.50195	0.800908	2268.22	28.7194	2376.52	17.2087	2471.47	18.9532	2471.47	18.9532	8.22376	1.35856		2471.47	23.3805
17-02	546	89.2732	36546.8	0.673605	6.18528	1.56036	10.5234	2.16263	0.472285	1.49741	0.692403	2493.57	30.9651	2481.98	20.054	2473.23	26.3344	2473.23	26.3344	-0.822634	1.64925		2473.23	29.528
17-02	495	291.294	98637.8	0.218744	6.0531	1.49601	9.1294	4.90368	0.400966	4.6699	0.952327	2173.49	86.1614	2351.06	44.8829	2509.62	25.1561	2509.62	25.1561	13.3939	3.5413		2509.62	28.4899
17-02	130	65.7252	18147.8	0.9836	6.02762	2.13645	10.1943	2.88385	0.445851	1.93705	0.67169	2376.78	38.5058	2452.56	26.6678	2516.71	35.9033	2516.71	35.9033	5.56013	2.03864		2516.71	38.0162
17-02	71	54.9491	26627.1	0.407235	5.99749	2.16606	10.3778	2.6992	0.451609	1.61054	0.596673	2402.4	32.3	2469.07	24.9996	2525.13	36.3709	2525.13	36.3709	4.86049	1.87458		2525.13	38.4355
17-02	490	101.952	46804.7	0.743771	5.93605	1.92153	11.4179	2.70546	0.491779	1.90453	0.703958	2578.37	40.4736	2557.89	25.2598	2542.41	32.2086	2542.41	32.2086	-1.41426	2.0457		2542.41	34.6653
17-02	350	82.8666	49014.6	0.524243	5.90216	1.40113	11.5375	1.97774	0.494094	1.39581	0.705761	2588.37	29.7562	2567.62	18.4804	2552	23.4618	2552	23.4618	-1.42486	1.49298		2552	27.0129
17-02	585	595.246	176946	0.355056	5.87981	1.14918	10.3607	1.97069	0.442017	1.60094	0.812375	2359.67	31.6347	2467.54	18.2492	2558.35	19.23	2558.35	19.23	7.76613	1.41762		2558.35	23.5302
17-02	445	133.278	52908.7	1.0153	5.81365	1.62983	10.924	4.22139	0.460808	3.89407	0.922461	2443.12	79.187	2516.68	39.2735	2577.27	27.2312	2577.27	27.2312	5.20515	3.23164		2577.27	30.2338
17-02	276	275.749	113930	0.491242	5.80464	1.33482	10.5587	2.02902	0.444708	1.52813	0.753136	2371.68	30.3231	2485.09	18.8204	2579.87	22.2963	2579.87	22.2963	8.06953	1.41871		2579.87	26.0118
17-02	133	138.687	69127.2	0.676528	5.78188	1.77058	11.9375	2.54624	0.500807	1.82985	0.718649	2617.27	39.3624	2599.51	23.8568	2586.43	29.5504	2586.43	29.5504	-1.19238	1.91123		2586.43	32.2721
17-02	260	318.912	174709	0.75602	5.74885	1.63256	11.8287	2.4597	0.493405	1.8398	0.747979	2585.39	39.1847	2590.93	23.0295	2595.99	27.2212	2595.99	27.2212	0.408054	1.83548		2595.99	30.2166
17-02	366	495.663	31542.2	0.103305	5.74828	1.15864	11.9384	1.77929	0.497934	1.35034	0.758921	2604.91	28.9361	2599.58	16.6706	2596.15	19.3168	2596.15	19.3168	-0.337439	1.34151		2596.15	23.5651
17-02	462	236.979	105834	0.959084	5.72387	1.18971	11.2238	1.86759	0.466143	1.43961	0.770838	2466.62	29.5057	2541.9	17.4123	2603.24	19.8217	2603.24	19.8217	5.24783	1.34356		2603.24	23.9703
17-02	517	293.79	36905.3	0.295269	5.71277	1.52067	11.536	3.66634	0.478176	3.3361	0.909928	2519.32	69.5702	2567.5	34.261	2606.47	25.3297	2606.47	25.3297	3.34395	2.82958		2606.47	28.5743
17-02	378	156.27	82490.5	0.703373	5.69062	1.57192	12.2305	2.16728	0.504999	1.49205	0.688441	2635.25	32.2742	2622.25	20.3436	2612.94	26.1734	2612.94	26.1734	-0.853557	1.59568		2612.94	29.2926
17-02	465	134.961	79388.7	0.788386	5.68222	1.43104	11.1684	1.92381	0.460467	1.28576	0.668338	2441.62	26.1327	2537.29	17.9292	2615.4	23.8219	2615.4	23.8219	6.64465	1.31202		2615.4	27.2728
17-02	357	34.9795	5967.86	1.15712	5.67756	3.92414	12.4327	4.21577	0.512173	1.54074	0.36547	2665.9	33.6405	2637.66	39.6246	2616.77	65.308	2616.77	65.308	-1.87756	2.84913		2616.77	65.2495
17-02	53	67.7555	26276.4	1.06599	5.65153	1.51658	12.0102	2.22714	0.492496	1.63099	0.732325	2581.46	34.6944	2605.2	20.8765	2624.42	25.2238	2624.42	25.2238	1.63661	1.62524		2624.42	28.4642
17-02	590	167.613	36031.7	0.367042	5.63937	1.28708	12.1881	3.22968	0.498719	2.96214	0.917161	2608.29	63.5423	2619	30.3093	2628	21.3992	2628	21.3992	0.749909	2.54939		2628	25.2323
17-02	94	387.199	187544	0.34491	5.61958	1.13197	11.7553	1.67257	0.479319	1.23131	0.736181	2524.3	25.7187	2585.11	15.6518	2633.84	18.8032	2633.84	18.8032	4.15894	1.19233		2633.84	23.1277
17-02	254	78.5115	38367.5	0.695171	5.60616	1.26252	12.1729	2.23245	0.495162	1.84116	0.824726	2592.97	39.307	2617.82	20.9479	2637.81	20.965	2637.81	20.965	1.69983	1.68253		2637.81	24.8715
17-02	420	148.734	73281.7	1.00355	5.5628	1.18497	12.5322	1.75022	0.505836	1.28808	0.735949	2638.83	27.8928	2645.15	16.4586	2650.69	19.653	2650.69	19.653	0.447665	1.28534		2650.69	23.7982
17-02	598	105.037	35408.1	0.565063	5.54621	1.29415	12.8601	2.17397	0.517523	1.7468	0.803508	2688.67	38.4024	2669.46	20.4822	2655.65	21.4607	2655.65	21.4607	-1.24328	1.66147		2655.65	25.2656
17-02	227	319.925	152807	0.580156	5.5457	1.14728	12.2142	1.72677	0.491483	1.29053	0.747371	2577.09	27.4144	2621	16.2068	2655.8	19.0248	2655.8	19.0248	2.96376	1.24448		2655.8	23.2848
17-02	415	88.6482	60493	0.424082	5.4776	2.14462	11.056	3.9896	0.439418	3.36415	0.84323	2348.03	66.2045	2527.86	37.1537	2676.27	35.4881	2676.27	35.4881	12.2647	2.73368		2676.27	37.5576
17-02	444	296.158	43162.7	0.415202	5.46668	1.27454	11.1893	2.60948	0.443828	2.27704	0.872605	2367.76	45.1222	2539.03	24.3236	2679.57	21.0806	2679.57	21.0806	11.6368	1.82178		2679.57	24.9376
17-02	334	57.1173	10801.5	1.74111	5.4634	1.86381	12.9292	2.42936	0.512533	1.55821	0.641407	2667.44	34.0379	2674.51	22.8974	2680.56	30.8278	2680.56	30.8278	0.48978	1.70941		2680.56	33.3555
17-02	363	52.8839	23355.3	1.23702	5.45772	1.87248	12.7943	2.4014	0.50666	1.5035	0.626095	2642.36	32.5931	2664.63	22.6167	2682.28	30.9663	2682.28	30.9663	1.48858	1.66432		2682.28	33.4781
17-02	104	67.1767	34776.7	0.504961	5.43028	1.72955	13.1899	2.74709	0.5197	2.13429	0.776925	2697.91	47.0509	2693.34	25.9292	2690.61	28.5798	2690.61	28.5798	-0.271262	2.04753		2690.61	31.3599
17-02	136	111.204	53756.6	0.73813	5.42331	1.36927	13.38	1.92407	0.526511	1.35172	0.702529	2726.73	30.0546	2706.84	18.1786	2692.73	22.6205	2692.73	22.6205	-1.26261	1.40335		2692.73	26.2144
17-02	166	249.255	121357	0.930484	5.41576	1.66496	13.1724	2.44943	0.51762	1.79656	0.733461	2689.08	39.5011	2692.08	23.1172	2695.04	27.5008	2695.04	27.5008	0.221201	1.78464		2695.04	30.4078
17-02	103	114.361	54340.5	0.445545	5.4144	1.412	13.1829	1.97908	0.517905	1.38672	0.70069	2690.29	30.501	2692.84	18.6789	2695.45	23.3208	2695.45	23.3208	0.191516	1.42343		2695.45	26.8026
17-02	562	195.123	24024	0.87246	5.41292	1.7363	11.7598	3.40469	0.461868	2.92868	0.86019	2447.8	59.6491	2585.47	31.8639	2695.9	28.6773	2695.9	28.6773	9.20287	2.4142		2695.9	31.442
17-02	228	294.469	73104.4	0.115337	5.40892	1.11043	12.0524	1.85876	0.473013	1.49061	0.801939	2496.76	30.8567	2608.49	17.428	2697.12	18.3358	2697.12	18.3358	7.42884	1.30572		2697.12	22.7126
17-02	190	52.829	36268.6	1.54811	5.39555	1.98719	13.654	2.44176	0.534545	1.41889	0.581095	2760.57	31.862	2726.01	23.1023	2701.21	32.806	2701.21	32.806	-2.19755	1.71227		2701.21	35.1217
17-02	375	133.322	51184.5	0.557687	5.39376	1.52374	12.6575	2.14169	0.495369	1.50501	0.702719	2593.86	32.1394	2654.51	20.1548	2701.76	25.1587	2701.76	25.1587	3.99363	1.48806		2701.76	28.3614
17-02	421	107.622	41850.4	0.440381	5.37239	1.26604	12.2338	1.88481	0.476888	1.3963	0.740818	2513.7	29.0648	2622.51	17.6924	2708.31	20.8906	2708.31	20.8906	7.18578	1.29006		2708.31	24.7576
17-02	575	101.83	65140.1	0.625543	5.37224	1.65495	13.2944	3.17551	0.518216	2.71016	0.853458	2691.61	59.6339	2700.78	29.99	2708.36	27.3081	2708.36	27.3081	0.618375	2.41914		2708.36	30.2235
17-02	273	105.768	60189.2	0.530777	5.36327	1.45851	13.7763	2.01219	0.536104	1.38623	0.688918	2767.12	31.1878	2734.45	19.0493	2711.12	24.0603	2711.12	24.0603	-2.06571	1.46418		2711.12	27.413
17-02	214	96.9626	29843.9	0.405932	5.36269	1.45347	13.7255	2.15552	0.53407	1.59176	0.738458	2758.58	35.7232	2730.95	20.4012	2711.29	23.9766	2711.29	23.9766	-1.74397	1.59547		2711.29	27.3416
17-02	439	98.0626	56202.3	0.811522	5.35595	1.32945	13.476	1.95944	0.523705	1.43943	0.734612	2714.87	31.893	2713.61	18.5219	2713.37	21.9265	2713.37	21.9265	-0.0555567	1.42664		2713.37	25.6113
17-02	265	205.361	91593.7	0.411117	5.31007	1.34203	13.7938	2.04681	0.531461	1.54544	0.755048	2747.61	34.573	2735.65	19.3787	2727.55	22.0978	2727.55	22.0978	-0.735354	1.50756		2727.55	25.7488
17-02	114	185.023	73795	0.243989	5.28748	1.28271	13.2226	1.87968	0.507285	1.37399	0.730969	2645.03	29.8097	2695.67	17.7444	2734.57	21.1072	2734.57	21.1072	3.27436	1.32126		2734.57	24.9203
17-02	312	135.796	65219.4	1.0857	5.27647	1.31731	14.2346	1.89014	0.544973	1.35548	0.717131	2804.23	30.8223	2765.46	17.9328	2737.99	21.67	2737.99	21.67	-2.41929	1.3872		2737.99	25.3903
17-02	466	61.6303	32981.1	1.20729	5.2735	1.39891	13.8468	2.15499	0.529831	1.63921	0.760659	2740.74	36.5972	2739.29	20.4083	2738.92	23.0109	2738.92	23.0109	-0.0665583	1.57867		2738.92	26.5135
17-02	189	82.7641	37375.1	1.49302	5.27262	1.52739	14.2786	2.22021	0.546263	1.61133	0.725757	2809.61	36.6963	2768.4	21.0689	2739.19	25.1243	2739.19	25.1243	-2.57082	1.63702		2739.19	28.3168
17-02	487	231.632	191854	0.347856	5.27107	1.85002	13.5212	3.68023	0.517131	3.18144	0.864466	2687	69.9074	2716.77	34.7985	2739.67	30.4315	2739.67	30.4315	1.92255	2.7745		2739.67	32.9759
17-02	329	93.4204	8987.52	0.60054	5.25669	1.62742	13.6095	2.24077	0.519089	1.54031	0.687403	2695.32	33.9303	2722.92	21.1958	2744.17	26.758	2744.17	26.758	1.78023	1.56398		2744.17	29.7298
17-02	274	77.0355	29558.5	1.21926	5.25042	1.59258	14.0176	2.18721	0.534017	1.49919	0.685435	2758.35	33.6435	2750.9	20.7305	2746.13	26.1804	2746.13	26.1804	-0.445023	1.55497		2746.13	29.2252
17-02	441	181.618	63714.8	0.513399	5.23591	1.30186	13.8469	1.98959	0.526057	1.50454	0.756207	2724.82	33.4338	2739.29	18.8418	2750.68	21.3976	2750.68	21.3976	0.940243	1.43916		2750.68	25.1478
17-02	80	134.804	72461.3	0.330204	5.22266	1.39822	13.5622	2.01966	0.513936	1.4574	0.721606	2673.41	31.8933	2719.63	19.0996	2754.85	22.9726	2754.85	22.9726	2.9561	1.41251		2754.85	26.4625
17-02	279	50.3588	28240.2	0.503555	5.17741	1.77893	14.6188	2.38084	0.549178	1.58235	0.664617	2821.75	36.1604	2790.76	22.6278	2769.13	29.1818	2769.13	29.1818	-1.90025	1.69067		2769.13	31.8456
17-02	116	358.809	178770	0.724563	5.17238	1.30945	14.3474	1.89211	0.538459	1.36581	0.721844	2776.99	30.816	2772.96	17.9609	2770.73	21.4822	2770.73	21.4822	-0.226201	1.35678		2770.73	25.2022
17-02	57	184.136	66174.1	0.652366	5.16972	1.20959	14.3853	1.78758	0.539601	1.31618	0.736293	2781.78	29.7372	2775.46	16.9714	2771.57	19.8424	2771.57	19.8424	-0.368219	1.29133		2771.57	23.8552
17-02	51	65.1265	35806.7	0.298779	5.03999	1.86084	14.2346	2.58371	0.520551	1.79244	0.693747	2701.52	39.5573	2765.47	24.5137	2813.18	30.4112	2813.18	30.4112	3.9691	1.74784		2813.18	32.9103
17-02	548	205.273	62413	0.411043	5.0367	1.20192	13.5734	1.76801	0.496046	1.29663	0.733384	2596.78	27.7148	2720.41	16.7206	2814.24	19.6405	2814.24	19.6405	7.7272	1.17666		2814.24	23.6624
17-02	509	146.578	26632.1	0.153896	4.9756	1.36107	14.2446	2.39997	0.514262	1.9767	0.823636	2674.8	43.2756	2766.13	22.7713	2834.16	22.1944	2834.16	22.1944	5.62295	1.69639		2834.16	25.7665
17-02	140	63.0214	29666.9	0.710386	4.96023	1.63009	15.3276	2.08106	0.551651	1.29369	0.62165	2832.04	29.6497	2835.82	19.8372	2839.21	26.5709	2839.21	26.5709	0.252578	1.4007		2839.21	29.5139
17-02	348	59.0634	30307.7	1.27918	4.92604	1.68912	15.7786	2.16315	0.563967	1.35134	0.624708	2883	31.413	2863.49	20.6559	2850.48	27.5131	2850.48	27.5131	-1.14089	1.47223		2850.48	30.3247
17-02	522	119.181	57912.1	0.520483	4.91356	1.672	14.6657	2.28107	0.522861	1.55168	0.68024	2711.3	34.3436	2793.8	21.6839	2854.61	27.224	2854.61	27.224	5.0202	1.50596		2854.61	30.0682
17-02	400	90.4357	36953.7	0.472561	4.90562	1.26336	15.7389	1.84727	0.560217	1.34771	0.729569	2867.53	31.1951	2861.08	17.6367	2857.24	20.5653	2857.24	20.5653	-0.359865	1.30912		2857.24	24.3886
17-02	52	99.7873	51301.2	0.424948	4.88299	1.39346	15.8611	2.03287	0.561961	1.48014	0.728104	2874.73	34.3288	2868.47	19.4178	2864.77	22.6678	2864.77	22.6678	-0.34771	1.4375		2864.77	26.135
17-02	551	296.975	128692	1.27132	4.86916	1.14606	15.2554	1.64926	0.538972	1.18601	0.719115	2779.15	26.7758	2831.32	15.7164	2869.38	18.6354	2869.38	18.6354	3.14468	1.12537		2869.38	22.8155
17-02	128	496.024	134145	0.6097	4.8373	1.6814	14.9703	2.47489	0.525439	1.81603	0.733782	2722.21	40.3246	2813.36	23.5571	2880.05	27.3076	2880.05	27.3076	5.48056	1.66239		2880.05	30.1315
17-02	144	323.48	126186	0.443554	4.80794	1.41015	15.794	2.13932	0.550983	1.60878	0.752006	2829.26	36.8424	2864.42	20.4295	2889.93	22.8813	2889.93	22.8813	2.09934	1.49201		2889.93	26.31
17-02	284	80.7279	40268.9	0.853522	4.71507	1.12816	17.2221	1.61466	0.589201	1.15515	0.715417	2986.18	27.6085	2947.29	15.4955	2921.54	18.2603	2921.54	18.2603	-2.21255	1.14068		2921.54	22.4808
17-02	188	102.118	70255	0.795364	4.69919	1.55038	17.2477	2.16735	0.588087	1.51451	0.698783	2981.66	36.1541	2948.71	20.8016	2927	25.075	2927	25.075	-1.86736	1.51237		2927	28.1611
17-02	581	124.874	49454.2	0.533916	4.60882	1.24542	15.28	2.05993	0.510976	1.6408	0.796534	2660.79	35.77	2832.85	19.632	2958.37	20.0947	2958.37	20.0947	10.0587	1.35469		2958.37	23.9372
17-02	412	85.3541	44948.2	0.604802	4.51552	1.48387	17.7403	2.06311	0.581243	1.43336	0.694759	2953.82	33.9652	2975.76	19.8312	2991.31	23.8667	2991.31	23.8667	1.25338	1.38203		2991.31	27.0918
17-02	258	301.862	113648	0.676027	4.39523	1.63481	18.6029	2.52345	0.593269	1.92229	0.76177	3002.66	46.1424	3021.45	24.3168	3034.67	26.198	3034.67	26.198	1.05481	1.74401		3034.67	29.0802
Analyses with >10% discordance; >5% reverse discordance; >10% for >700 Ma and 25%/50% for <700 Ma 2s uncertainty (1200 Ma cutoff for 206Pb/238U versus 207Pb/206Pb age)
17-02	74	84.6238	8986.6	0.823772	13.5962	13.6435	0.799404	13.7796	0.0788629	1.93218	0.14022	489.332	9.10485	596.493	62.1785	1029.12	276.119	489.332	9.10485	52.4516	12.7881		489.332	9.67953
17-02	95	69.5924	4911.91	0.461692	14.4277	17.3	0.76507	17.3959	0.0800912	1.8244	0.104876	496.667	8.72095	576.931	76.5987	908.001	356.94	496.667	8.72095	45.301	21.5239		496.667	9.33713
17-02	574	1395.45	1425.87	0.329197	16.7844	14.1088	0.675063	14.1917	0.0822124	1.53213	0.107959	509.315	7.50306	523.786	58.0895	588.328	306.411	509.315	7.50306	13.4301	45.1051		509.315	8.24741
17-02	218	493.574	202.875	0.513245	14.3633	64.6144	0.811801	64.8872	0.0846043	5.94396	0.0916045	523.547	29.8893	603.464	297.314	917.239	1363.63	523.547	29.8893	42.9214	84.9195		523.547	30.0268
17-02	206	80.19	4009.85	0.539896	14.4504	10.0415	0.819933	10.2798	0.0859696	2.2005	0.214061	531.657	11.2297	608.011	47.0342	904.759	207.066	531.657	11.2297	41.2378	13.5056		531.657	11.7762
17-02	224	317.813	34478.3	0.289335	14.5903	2.47376	1.04264	2.95126	0.110379	1.60948	0.545354	674.95	10.3138	725.233	15.2964	884.888	51.1439	674.95	10.3138	23.7248	4.55996		674.95	11.2418
17-02	530	1382.5	12296.2	0.248192	14.7692	1.98346	1.09749	2.8492	0.11761	2.04544	0.717901	716.792	13.8758	752.134	15.1377	859.622	41.1684	716.792	13.8758	16.6155	4.30729		716.792	14.6531
17-02	118	206.759	1692.21	0.373374	11.2817	3.46712	1.4485	4.66793	0.118571	3.12547	0.669563	722.334	21.3575	909.25	28.0414	1396.36	66.4858	722.334	21.3575	48.2703	2.8993		722.334	21.8521
17-02	534	659.188	6875.96	0.262204	11.4186	5.11004	1.43385	13.9773	0.118796	13.0097	0.930774	723.629	89.0522	903.155	83.6584	1373.2	98.3118	723.629	89.0522	47.3034	7.50259		723.629	88.569
17-02	456	546.801	21062.7	0.286333	12.7481	2.69345	1.29701	3.43902	0.119971	2.13827	0.621767	730.396	14.7656	844.399	19.7178	1158.1	53.4533	730.396	14.7656	36.9313	3.17798		730.396	15.5218
17-02	146	625.16	56921.2	0.280091	11.3102	1.74708	1.48934	2.98389	0.122222	2.41894	0.810668	743.34	16.983	926.045	18.1273	1391.52	33.5211	743.34	16.983	46.5808	1.77355		743.34	17.659
17-02	151	464.22	46552.6	0.309235	12.2603	1.95406	1.50328	3.20606	0.13373	2.54174	0.792794	809.109	19.3272	931.716	19.5499	1235.08	38.2929	809.109	19.3272	34.4894	2.56402		809.109	20.0192
17-02	535	138.702	23530.1	0.421268	13.7988	3.53061	1.35352	3.88517	0.135517	1.62152	0.417363	819.261	12.475	869.078	22.6884	999.152	71.6769	819.261	12.475	18.0043	6.01324		819.261	13.5789
17-02	470	284.108	38617	0.490896	10.778	2.94423	1.7961	6.62898	0.140462	5.93927	0.895955	847.272	47.1552	1044.04	43.2434	1483.41	55.7952	847.272	47.1552	42.8836	3.8367		847.272	47.309
17-02	550	688.082	4210.32	0.508862	13.7184	1.80646	1.41508	2.53781	0.140855	1.78247	0.702364	849.494	14.1867	895.295	15.0989	1011.01	36.6071	849.494	14.1867	15.9757	3.3504		849.494	15.2286
17-02	70	442.035	47852.3	0.216928	10.7423	3.48886	1.85563	10.9089	0.144636	10.3359	0.947479	870.822	84.1943	1065.43	72.0083	1489.71	66.059	870.822	84.1943	41.5441	6.21781		870.822	83.8394
17-02	216	83.031	5339.72	0.401378	13.0583	9.7269	1.611	11.7757	0.152641	6.63732	0.563647	915.748	56.6617	974.496	73.8066	1110.24	194.438	915.748	56.6617	17.5183	15.3201		915.748	56.7269
17-02	596	460.82	1390.64	0.398969	13.0638	6.07413	1.63463	6.28811	0.154944	1.62645	0.258655	928.621	14.0661	983.644	39.6191	1109.4	121.368	928.621	14.0661	16.2955	9.24461		928.621	15.3014
17-02	110	200.816	22405	0.496402	13.0201	3.30476	1.65422	4.56833	0.156276	3.15408	0.690422	936.051	27.4804	991.166	28.9116	1116.14	65.9688	936.051	27.4804	16.1346	5.53463		936.051	28.0911
17-02	569	947.351	34500.6	0.227754	12.975	1.2471	1.6787	1.84187	0.15804	1.35544	0.735905	945.876	11.9246	1000.49	11.7204	1123.02	24.8637	945.876	11.9246	15.774	2.14589		945.876	13.4141
17-02	576	154.353	13613.6	0.205953	12.5203	3.63269	1.75672	4.32367	0.15959	2.34472	0.542298	954.496	20.8022	1029.64	27.9782	1193.77	71.7202	954.496	20.8022	20.0437	5.10996		954.496	21.6775
17-02	568	348.496	2218.78	0.586536	11.6347	10.8364	1.93794	11.4383	0.1636	3.66133	0.320095	976.752	33.1847	1094.29	76.6467	1337.04	209.614	976.752	33.1847	26.9465	11.7189		976.752	33.7004
17-02	498	120.914	15210.9	0.332584	9.66666	7.74721	2.36997	27.9156	0.166229	26.819	0.960719	991.302	246.455	1233.59	199.983	1686.87	143.006	991.302	246.455	41.2344	15.4362		991.302	241.913
17-02	72	71.4861	10962.2	0.411628	14.0137	8.36942	1.64201	9.13696	0.166961	3.66565	0.401189	995.346	33.8088	986.486	57.6753	967.698	170.88	995.346	33.8088	-2.85714	18.4959		995.346	34.3311
17-02	523	351.385	2268.36	0.415767	9.22798	2.42712	2.50096	4.22391	0.167456	3.45695	0.818425	998.08	31.9649	1272.31	30.6406	1772.11	44.3117	998.08	31.9649	43.6785	2.28844		998.08	32.5346
17-02	549	419.251	1482.49	0.402073	10.6533	9.99552	2.16771	10.2997	0.167561	2.48466	0.241236	998.656	22.9867	1170.75	71.5962	1505.44	188.967	998.656	22.9867	33.6636	8.46554		998.656	23.8419
17-02	512	736.927	8976.51	0.901467	10.5921	1.81202	2.20231	4.27452	0.169258	3.87145	0.905703	1008.02	36.1269	1181.78	29.8513	1516.32	34.1845	1008.02	36.1269	33.5217	2.81473		1008.02	36.6114
17-02	343	267.955	29018	0.79745	11.0792	1.62335	2.1351	3.08897	0.171638	2.62802	0.850774	1021.13	24.8181	1160.24	21.3612	1431	30.9803	1021.13	24.8181	28.6422	2.32259		1021.13	25.6366
17-02	76	1002.18	41407.3	0.394747	12.2789	1.27075	1.95937	4.1106	0.174568	3.90925	0.951017	1037.23	37.4541	1101.67	27.6363	1232.11	24.9172	1037.23	37.4541	15.8164	3.48411		1037.23	37.9409
17-02	117	81.5817	8996.39	0.312531	13.8771	9.274	1.77114	9.42209	0.178337	1.66393	0.176599	1057.88	16.234	1034.94	61.165	987.68	188.771	1057.88	16.234	-7.10772	20.5369		1057.88	17.5947
17-02	217	204.803	4376.19	0.862148	10.5362	3.02285	2.36023	12.5433	0.180437	12.1736	0.970527	1069.36	119.959	1230.65	89.5177	1526.29	56.9561	1069.36	119.959	29.9374	8.28296		1069.36	119.049
17-02	181	745.735	129192	0.271281	11.4094	1.27327	2.18512	2.16473	0.180894	1.75066	0.808721	1071.86	17.2875	1176.31	15.0796	1374.75	24.4888	1071.86	17.2875	22.0327	1.87356		1071.86	18.5979
17-02	508	222.465	30358.2	0.247025	6.16968	1.91347	4.04793	3.12782	0.181211	2.47424	0.791043	1073.58	24.469	1643.88	25.4691	2477.49	32.2816	1073.58	24.469	56.6665	1.13766		1073.58	25.3841
17-02	356	29.4563	4559.94	0.682866	12.6967	17.8222	1.9888	17.9788	0.183218	2.36759	0.131688	1084.53	23.6336	1111.71	121.62	1166.11	353.72	1084.53	23.6336	6.99605	28.2839		1084.53	24.6029
17-02	73	155.009	24315.5	0.740729	13.8453	5.21581	1.82576	5.42395	0.183415	1.48812	0.274361	1085.61	14.8681	1054.76	35.5876	992.31	106.104	1085.61	14.8681	-9.40179	11.7935		1085.61	16.4175
17-02	156	634.829	16993.6	0.528894	10.6291	2.35085	2.38733	7.49217	0.184119	7.1138	0.949498	1089.44	71.3061	1238.81	53.6282	1509.73	44.3901	1089.44	71.3061	27.839	5.17779		1089.44	71.2562
17-02	314	87.475	17366.8	0.98889	12.7709	7.07358	2.00195	7.31094	0.185508	1.84782	0.252747	1097	18.6396	1116.17	49.5153	1154.55	140.415	1097	18.6396	4.98466	11.6679		1097	19.9079
17-02	558	25.3636	5262.32	0.813594	13.378	11.1731	1.91211	11.891	0.185607	4.069	0.342192	1097.53	41.0639	1085.32	79.3184	1061.79	225.005	1097.53	41.0639	-3.36624	22.2432		1097.53	41.5359
17-02	283	87.5187	14342.7	0.41181	13.2742	6.28463	1.93067	6.43831	0.185954	1.39833	0.21719	1099.42	14.1341	1091.77	43.0733	1077.44	126.178	1099.42	14.1341	-2.03974	12.0215		1099.42	15.7948
17-02	385	23.9489	5880.41	0.417016	12.3647	16.5574	2.07606	16.7909	0.186256	2.79011	0.166168	1101.06	28.2404	1140.93	115.19	1218.42	326.045	1101.06	28.2404	9.63224	24.2929		1101.06	29.0544
17-02	88	43.59	7844.39	0.392333	13.0471	11.8948	1.97122	12.6877	0.18661	4.4149	0.347967	1102.98	44.7577	1105.72	85.5204	1111.97	237.773	1102.98	44.7577	0.807621	21.5889		1102.98	45.1609
17-02	142	363.871	19997.4	0.319666	10.2955	1.84433	2.52538	2.9421	0.188653	2.29224	0.779119	1114.07	23.4524	1279.37	21.4005	1569.7	34.55	1114.07	23.4524	29.0263	2.16163		1114.07	24.4803
17-02	372	36.7769	4873.83	0.728324	12.0947	14.1405	2.1656	14.2599	0.190047	1.84108	0.129109	1121.63	18.9534	1170.07	99.1318	1261.71	276.637	1121.63	18.9534	11.1024	19.5491		1121.63	20.2518
17-02	449	1328.12	6662.3	0.222231	11.5255	1.30717	2.27479	2.2858	0.190234	1.87516	0.820348	1122.64	19.3202	1204.5	16.1226	1355.25	25.2103	1122.64	19.3202	17.1634	2.09922		1122.64	20.5959
17-02	167	243.375	2623.34	0.232978	12.473	13.6211	2.11664	13.754	0.19156	1.907	0.13865	1129.82	19.7632	1154.24	94.915	1201.27	268.737	1129.82	19.7632	5.94794	21.1047		1129.82	21.0246
17-02	583	66.1099	10766.2	0.539156	13.1404	6.62687	2.03424	6.81363	0.193955	1.58437	0.232529	1142.76	16.5915	1127.04	46.3913	1097.75	132.649	1142.76	16.5915	-4.10057	12.6697		1142.76	18.1208
17-02	248	280.802	42036.2	0.660448	9.93952	2.64553	2.70352	6.35687	0.194977	5.78022	0.909288	1148.28	60.798	1329.43	47.1266	1635.34	49.141	1148.28	60.798	29.7835	4.27477		1148.28	60.9549
17-02	561	154.39	2176.17	0.558685	9.62703	4.25	2.84678	4.70965	0.198854	2.02936	0.430894	1169.16	21.6993	1367.96	35.3931	1694.45	78.3553	1169.16	21.6993	31.0007	3.43808		1169.16	22.9193
17-02	199	129.461	14549.6	0.54605	11.4121	3.06262	2.42744	3.54492	0.201003	1.78518	0.503587	1180.7	19.2601	1250.76	25.494	1374.29	58.9053	1180.7	19.2601	14.0861	3.94014		1180.7	20.6617
17-02	587	650.298	49306.8	0.489203	6.40953	5.99587	4.3226	15.9881	0.201029	14.8212	0.927016	1180.85	159.93	1697.68	132.026	2412.94	101.847	1180.85	159.93	51.0618	6.94242		1180.85	158.145
17-02	355	66.8293	10971.5	0.58472	10.1397	6.38757	2.76221	9.9227	0.203223	7.59335	0.76525	1192.61	82.6768	1345.39	74.0058	1598.21	119.248	1192.61	82.6768	25.3784	7.60006		1192.61	82.4978
17-02	282	195.735	3453.26	0.295231	11.895	10.0637	2.36135	10.1381	0.203804	1.22547	0.120878	1195.72	13.3745	1230.99	72.3463	1294.13	195.858	1195.72	13.3745	7.60444	14.0215		1195.72	15.3939
17-02	593	300.31	25594.7	0.591209	10.0872	1.58992	2.93639	3.76143	0.214917	3.40889	0.906274	1254.96	38.8738	1391.34	28.4923	1607.9	29.6355	1607.9	29.6355	21.9503	2.81328		1607.9	33.0659
17-02	499	356.403	26439.7	0.62263	9.85536	2.11788	3.14185	11.8364	0.22467	11.6454	0.983862	1306.5	137.726	1443	91.2289	1651.12	39.259	1651.12	39.259	20.8717	8.55089		1651.12	41.5866
17-02	141	393.539	17814.8	0.451606	9.83351	1.79707	3.33702	2.40466	0.238098	1.59779	0.664455	1376.8	19.8079	1489.76	18.7873	1655.23	33.2938	1655.23	33.2938	16.8214	2.05699		1655.23	36.2336
17-02	481	115.727	16645.6	0.483201	9.80416	2.89306	3.49908	3.80965	0.248916	2.47864	0.650621	1432.88	31.8457	1527.01	30.0868	1660.77	53.5648	1660.77	53.5648	13.7219	3.37942		1660.77	54.7152
17-02	451	178.68	33961.6	1.67886	9.70279	2.40637	3.25992	3.48449	0.229504	2.52014	0.723243	1331.9	30.3252	1471.54	27.077	1679.99	44.4436	1679.99	44.4436	20.7197	2.76715		1679.99	46.2932
17-02	516	154.173	34011.9	0.973542	9.68116	2.51391	3.53165	6.66302	0.248081	6.17058	0.926094	1428.57	79.0679	1534.33	52.7376	1684.11	46.4023	1684.11	46.4023	15.1735	5.24453		1684.11	48.0916
17-02	435	17.2668	5928.42	0.93301	9.60608	11.7903	4.71067	12.1825	0.328335	3.06619	0.251689	1830.31	48.8572	1769.14	102.124	1698.47	217.431	1698.47	217.431	-7.76231	14.092		1698.47	203.264
17-02	515	174.315	4095.68	0.695891	9.57083	4.17741	3.46187	4.58275	0.240408	1.88437	0.411188	1388.82	23.5434	1518.58	36.1074	1705.24	76.9115	1705.24	76.9115	18.5557	3.92428		1705.24	76.4275
17-02	352	218.5	26751.4	0.526863	9.49052	2.01385	3.09029	5.02962	0.212802	4.60885	0.916341	1243.73	52.1314	1430.28	38.5889	1720.73	37.0021	1720.73	37.0021	27.721	3.40503		1720.73	39.4978
17-02	251	348.056	70167.3	0.48069	9.47221	1.39405	3.44826	2.05273	0.236995	1.50676	0.734027	1371.06	18.6095	1515.47	16.1578	1724.28	25.6047	1724.28	25.6047	20.4854	1.59968		1724.28	29.5028
17-02	232	572.352	28449.2	0.74959	9.27308	1.48459	3.50858	2.32655	0.236071	1.79131	0.769945	1366.24	22.0541	1529.15	18.3842	1763.21	27.1355	1763.21	27.1355	22.5139	1.72816		1763.21	30.7658
17-02	506	359.668	67336.1	0.625323	9.25235	1.67446	3.54259	8.21628	0.237827	8.04385	0.979013	1375.39	99.6302	1536.78	65.0835	1767.3	30.587	1767.3	30.587	22.1756	5.79611		1767.3	33.7548
17-02	468	543.321	100294	0.224059	9.22045	1.29705	3.70252	1.96708	0.247707	1.47887	0.75181	1426.64	18.9266	1571.91	15.7263	1773.6	23.6734	1773.6	23.6734	19.5627	1.51376		1773.6	27.843
17-02	579	130.218	15145.8	0.402506	9.17986	2.64823	3.52637	5.90303	0.234883	5.27567	0.893722	1360.04	64.6883	1533.15	46.7046	1781.65	48.2921	1781.65	48.2921	23.664	4.17899		1781.65	49.7717
17-02	563	448.994	47095	0.228997	9.1771	1.25045	3.23182	1.84955	0.215199	1.3628	0.736827	1256.46	15.5576	1464.82	14.3424	1782.2	22.7984	1782.2	22.7984	29.4995	1.25515		1782.2	27.117
17-02	434	57.45	11617	0.361631	9.13386	3.82764	3.54978	5.53261	0.235258	3.99486	0.722057	1362	49.0465	1538.39	43.8367	1790.8	69.7221	1790.8	69.7221	23.945	4.03349		1790.8	69.6872
17-02	369	603.979	36188.3	0.61419	9.11497	1.3123	3.75515	2.02646	0.248353	1.54415	0.761993	1429.98	19.8034	1583.21	16.2495	1794.58	23.8936	1794.58	23.8936	20.3167	1.53079		1794.58	28.0029
17-02	513	420.649	60561.7	0.770757	9.09775	1.3812	3.80904	2.998	0.251442	2.66089	0.887553	1445.91	34.4645	1594.66	24.1123	1798.02	25.1373	1798.02	25.1373	19.5833	2.22219		1798.02	29.0383
17-02	236	201.797	37678.1	0.639828	9.08739	1.5672	5.37219	2.99355	0.354224	2.55054	0.85201	1954.74	43.007	1880.43	25.6273	1800.09	28.5154	1800.09	28.5154	-8.591	2.944		1800.09	31.9201
17-02	175	364.132	79071.4	0.490772	9.06935	2.5792	3.8305	8.70249	0.252069	8.3115	0.955072	1449.14	107.87	1599.18	70.0986	1803.71	46.9057	1803.71	46.9057	19.6577	6.3349		1803.71	48.4781
17-02	229	346.289	21298.6	0.833351	9.0467	2.01415	3.6471	6.83315	0.239401	6.52956	0.955571	1383.58	81.3058	1559.88	54.4654	1808.25	36.6078	1808.25	36.6078	23.4852	4.75572		1808.25	39.0781
17-02	112	209.711	47113.9	0.706538	8.96436	1.41014	4.01184	2.17267	0.260946	1.65287	0.760758	1494.68	22.0502	1636.6	17.6596	1824.85	25.5763	1824.85	25.5763	18.093	1.6667		1824.85	29.3873
17-02	226	676.259	11784.9	0.4438	8.93278	1.34677	3.45105	2.1663	0.223679	1.69678	0.783262	1301.29	19.9941	1516.11	17.0548	1831.25	24.4114	1831.25	24.4114	28.94	1.44547		1831.25	28.3984
17-02	123	213.31	52774.5	0.792625	8.92226	1.54929	4.39985	2.07142	0.284839	1.37494	0.663766	1615.69	19.6495	1712.31	17.1381	1833.39	28.0751	1833.39	28.0751	11.8741	1.72331		1833.39	31.5111
17-02	556	483.023	41105.5	0.340643	8.62449	1.6326	4.37906	2.94484	0.274032	2.45086	0.832255	1561.24	33.9827	1708.4	24.3437	1894.66	29.3631	1894.66	29.3631	17.598	2.20179		1894.66	32.5822
17-02	402	378.651	16968.6	0.379503	8.59201	1.47457	4.44793	2.83031	0.277294	2.41584	0.853561	1577.72	33.8094	1721.31	23.4644	1901.44	26.499	1901.44	26.499	17.025	2.12103		1901.44	30.1023
17-02	476	158.504	291.885	0.604934	8.57337	60.2472	4.98454	60.3788	0.310073	3.9836	0.0659767	1741.07	60.7807	1816.7	521.822	1905.35	1109.21	1905.35	1109.21	8.62202	53.2917		1905.35	809.898
17-02	212	14.8365	4729.13	1.04501	8.4848	11.3932	5.90166	11.6985	0.363332	2.65484	0.226939	1997.95	45.6101	1961.48	101.658	1923.98	204.376	1923.98	204.376	-3.84452	11.2828		1923.98	191.725
17-02	505	60.3755	2868.28	1.25685	8.40135	1.96799	6.69963	2.88679	0.408402	2.11201	0.73161	2207.61	39.4799	2072.57	25.5064	1941.68	35.1993	1941.68	35.1993	-13.6961	2.89525		1941.68	37.7191
17-02	124	416.679	157435	0.515276	8.10741	1.34247	5.09233	2.7712	0.299562	2.42432	0.874827	1689.14	36.0246	1834.83	23.5207	2005.14	23.8321	2005.14	23.8321	15.7595	2.05677		2005.14	27.7582
17-02	502	116.93	23488.4	0.530961	7.83271	9.30522	3.65186	31.8509	0.207545	30.4614	0.956373	1215.73	337.58	1560.91	255.222	2066.12	164.138	2066.12	164.138	41.1589	16.9944		2066.12	156.092
17-02	297	140.714	1041.32	0.110526	7.80267	2.58214	4.41411	3.81026	0.249904	2.8019	0.735357	1437.98	36.1135	1714.99	31.5454	2072.89	45.4899	2072.89	45.4899	30.6291	2.3136		2072.89	47.0217
17-02	482	577.241	36547.7	0.287709	7.70939	1.82898	4.08555	3.58547	0.228538	3.0839	0.86011	1326.83	36.9819	1651.42	29.2495	2094.05	32.1467	2094.05	32.1467	36.6381	2.0162		2094.05	34.8813
17-02	55	145.342	30774.1	0.480731	7.55942	1.71462	3.73228	2.32591	0.204715	1.5716	0.675694	1200.6	17.2158	1578.32	18.6268	2128.51	30.0205	2128.51	30.0205	43.5941	1.1345		2128.51	32.976
17-02	85	329.369	12930.2	0.450249	7.54416	1.5777	6.05961	3.40688	0.331698	3.01955	0.886309	1846.61	48.4841	1984.45	29.6948	2132.04	27.6122	2132.04	27.6122	13.388	2.53567		2132.04	30.8688
17-02	595	90.0599	6662.51	0.559762	7.4545	2.93391	4.49412	4.04871	0.243081	2.79002	0.689114	1402.69	35.1705	1729.89	33.6305	2152.94	51.2264	2152.94	51.2264	34.8476	2.25207		2152.94	52.2944
17-02	489	464.187	41223.8	0.616828	7.28222	1.78307	5.86933	2.83696	0.310127	2.20658	0.777797	1741.33	33.6716	1956.71	24.6138	2193.67	30.9904	2193.67	30.9904	20.6201	1.90096		2193.67	33.7932
17-02	475	178.777	51496.7	0.601025	7.24791	1.98756	6.40028	2.65203	0.336589	1.75581	0.662062	1870.24	28.5034	2032.31	23.2904	2201.87	34.5142	2201.87	34.5142	15.0616	1.85698		2201.87	36.9346
17-02	525	346.152	21542.2	0.310475	6.98404	2.27536	4.44148	3.87166	0.225073	3.13249	0.809082	1308.62	37.0996	1720.11	32.0903	2266.05	39.2395	2266.05	39.2395	42.2509	1.91844		2266.05	41.1856
17-02	244	308.868	55014.7	0.278188	6.81212	1.87727	5.24085	4.3191	0.259043	3.88979	0.900602	1484.94	51.5915	1859.28	36.8323	2308.93	32.2257	2308.93	32.2257	35.6869	2.40799		2308.93	34.8188
17-02	174	187.79	19379.9	0.721447	6.71594	1.72701	7.70919	2.53154	0.375668	1.85098	0.731169	2056.01	32.5845	2197.67	22.7543	2333.31	29.5694	2333.31	29.5694	11.8843	1.78805		2333.31	32.4429
17-02	483	48.5618	7496.92	0.847917	6.64732	2.85732	5.42362	4.18393	0.261592	3.05631	0.730487	1497.98	40.8528	1888.59	35.8731	2350.88	48.8378	2350.88	48.8378	36.28	2.18452		2350.88	49.9886
17-02	231	187.54	3778.22	0.557791	6.59618	4.9839	4.69336	6.69906	0.224628	4.4764	0.668213	1306.28	52.931	1766.06	56.088	2364.07	85.0771	2364.07	85.0771	44.7443	2.99453		2364.07	83.7727
17-02	486	627.091	115795	0.169381	6.56167	1.95279	5.29234	4.5301	0.251971	4.08759	0.902318	1448.63	53.0327	1867.63	38.6924	2373.02	33.2979	2373.02	33.2979	38.9542	2.39336		2373.02	35.738
17-02	473	304.074	52962.1	0.555614	6.53931	1.70569	7.75712	5.70753	0.368061	5.4467	0.9543	2020.27	94.4656	2203.25	51.3464	2378.84	29.0662	2378.84	29.0662	15.0733	4.10442		2378.84	31.9697
17-02	380	69.2187	17492.5	0.340715	6.52482	2.57256	6.36065	3.39228	0.301133	2.21122	0.651838	1696.92	32.9903	2026.85	29.7672	2382.62	43.8251	2382.62	43.8251	28.7791	1.90613		2382.62	45.3327
17-02	492	291.057	68493.8	0.446443	6.43697	1.80297	6.35084	8.56966	0.29662	8.37785	0.977617	1674.53	123.553	2025.5	75.2118	2405.68	30.6449	2405.68	30.6449	30.3927	5.21185		2405.68	33.3453
17-02	463	119.958	15564.5	0.530146	6.39284	1.75241	7.75103	2.45303	0.359535	1.71652	0.699754	1979.97	29.2629	2202.54	22.0623	2417.37	29.7442	2417.37	29.7442	18.0939	1.57514		2417.37	32.5437
17-02	592	118.482	34712.2	0.790956	6.36435	2.5897	6.92494	17.4319	0.319784	17.2385	0.988903	1788.68	269.299	2101.86	154.966	2424.94	43.9257	2424.94	43.9257	26.2384	11.1855		2424.94	45.4114
17-02	266	62.4683	16870.5	0.783869	6.35479	2.08682	7.81193	2.92136	0.360203	2.04439	0.699807	1983.14	34.9001	2209.58	26.2982	2427.49	35.3852	2427.49	35.3852	18.305	1.86685		2427.49	37.5936
17-02	238	44.9043	9802.17	0.683156	6.03515	3.76943	7.59182	5.76947	0.332446	4.36786	0.757065	1850.23	70.2528	2183.9	51.7751	2514.62	63.3673	2514.62	63.3673	26.421	3.35308		2514.62	63.4665
17-02	532	481.339	43554.2	0.606635	6.01219	1.25961	9.01931	2.08113	0.393454	1.65665	0.796034	2138.83	30.1545	2339.96	19.023	2521.02	21.1621	2521.02	21.1621	15.1603	1.39208		2521.02	25.1179
17-02	527	160.528	40972.3	0.354396	6.01111	2.32828	6.14209	5.18085	0.267891	4.62821	0.89333	1530.09	63.0393	1996.25	45.2474	2521.32	39.11	2521.32	39.11	39.314	2.67158		2521.32	40.9374
17-02	237	141.596	23957.5	1.0435	6.00317	1.62012	7.44091	2.84346	0.324112	2.33676	0.821803	1809.78	36.8726	2165.9	25.4529	2523.54	27.2123	2523.54	27.2123	28.2842	1.65318		2523.54	30.2518
17-02	589	66.3516	26460.7	0.532234	5.84479	3.66915	8.37345	15.3757	0.355108	14.9315	0.97111	1958.95	252.27	2272.31	139.687	2568.35	61.3497	2568.35	61.3497	23.7274	9.9898		2568.35	61.5676
17-02	159	76.3358	29270.6	0.758241	5.80812	1.73829	9.10641	4.66818	0.38377	4.33247	0.928085	2093.87	77.4578	2348.75	42.7161	2578.86	29.0388	2578.86	29.0388	18.8065	3.13963		2578.86	31.8195
17-02	280	215.023	50495.4	0.274027	5.76174	2.27043	7.10604	8.20747	0.297077	7.88719	0.960977	1676.8	116.454	2124.8	73.0879	2592.25	37.8738	2592.25	37.8738	35.3149	4.59074		2592.25	39.7699
17-02	526	415.9	136971	0.267623	5.69763	1.83971	10.0446	2.73484	0.415256	2.02357	0.739922	2238.91	38.2753	2438.89	25.2562	2610.89	30.6323	2610.89	30.6323	14.2474	1.77801		2610.89	33.2216
17-02	147	66.239	3276.35	0.748991	5.66769	4.04726	8.82351	4.51934	0.362857	2.011	0.444976	1995.7	34.5157	2319.93	41.223	2619.66	67.3393	2619.66	67.3393	23.8185	2.36025		2619.66	67.1462
17-02	554	435.011	4165.9	0.938644	5.4628	1.4054	9.4988	2.59082	0.376506	2.17651	0.840085	2059.94	38.3772	2387.43	23.8021	2680.75	23.2433	2680.75	23.2433	23.1579	1.57903		2680.75	26.7425
17-02	557	186.23	5411.08	0.542351	5.41849	1.68713	8.69133	4.22346	0.341706	3.87185	0.916748	1894.87	63.5675	2306.17	38.4639	2694.2	27.8693	2694.2	27.8693	29.6687	2.46903		2694.2	30.7318
17-02	518	52.4965	4367.71	0.584864	5.4131	3.75671	8.81404	7.19928	0.346185	6.14139	0.853057	1916.36	101.812	2318.95	65.6746	2695.85	62.0592	2695.85	62.0592	28.9145	4.1159		2695.85	62.1842
17-02	326	392.504	25261.4	0.195087	5.34704	1.35153	6.90392	2.30556	0.267853	1.86789	0.810165	1529.9	25.4388	2099.16	20.4491	2716.11	22.2848	2716.11	22.2848	43.6733	1.0444		2716.11	25.9085
17-02	242	848.034	25284.6	0.429715	5.29599	1.62518	7.51262	4.37322	0.288686	4.06003	0.928384	1634.96	58.6312	2174.49	39.1934	2731.92	26.7511	2731.92	26.7511	40.1534	2.22472		2731.92	29.7262
17-02	586	229.078	11753.8	0.152414	5.17325	1.96138	10.748	10.4148	0.403441	10.2284	0.982106	2184.86	189.559	2501.58	96.8218	2770.45	32.172	2770.45	32.172	21.1369	6.90318		2770.45	34.5147
17-02	93	211.772	54767.9	0.477464	5.11084	1.22602	11.7205	2.11457	0.434638	1.72287	0.81476	2326.59	33.6477	2582.34	19.7837	2790.34	20.0712	2790.34	20.0712	16.6197	1.34678		2790.34	24.0378
17-02	66	335.184	14775.6	0.494596	4.87381	0.994137	12.3226	2.44514	0.43577	2.23392	0.913617	2331.68	43.7079	2629.29	22.9649	2867.83	16.1673	2867.83	16.1673	18.6953	1.59151		2867.83	20.8963
17-02	521	146.85	48823.5	0.348444	4.83792	1.77786	11.3635	12.2957	0.398893	12.1665	0.989491	2163.94	223.666	2553.43	114.873	2879.84	28.8753	2879.84	28.8753	24.8591	7.80306		2879.84	31.5148
17-02	358	33.7681	12364.2	0.483569	4.82877	2.24408	13.3778	3.20971	0.468715	2.29486	0.714973	2477.92	47.2114	2706.69	30.3264	2882.92	36.4401	2882.92	36.4401	14.048	1.96524		2882.92	38.3303
17-02	239	371.524	6821.15	0.344986	4.51382	1.54958	10.5999	3.54953	0.347163	3.19343	0.899676	1921.04	53.0507	2488.7	32.9372	2991.92	24.9226	2991.92	24.9226	35.7924	1.85205		2991.92	27.9999
Sample 17-14			(Analyzed October_29_2020; 300/hr; 20 µm spot)
			Systematic errors (2σ): 206Pb/238U=	0.794711
			206Pb/207Pb=	1.00224
17-14	133	861.881	8658.85	0.00547918	18.5142	3.40932	0.48052	3.70046	0.0645512	1.43874	0.3888	403.244	5.62391	398.43	12.1952	371.553	76.7711	403.244	5.62391	-8.52951	22.4757		403.244	6.42163
17-14	174	658.27	13086.7	0.102286	13.6294	3.23784	1.47536	5.90275	0.145903	4.93547	0.836131	877.955	40.5102	920.329	35.7264	1024.19	65.5237	877.955	40.5102	14.278	6.76172		877.955	40.9018
17-14	181	1685.03	38150.8	0.104264	14.0101	1.76191	1.44069	5.07511	0.146454	4.75945	0.937803	881.053	39.1941	906.008	30.4205	968.218	35.9219	881.053	39.1941	9.00264	5.27113		881.053	39.6146
17-14	113	318.001	9114.86	0.0922929	14.3431	3.55509	1.46816	4.23545	0.152793	2.30225	0.543567	916.601	19.6709	917.37	25.583	920.133	73.0584	916.601	19.6709	0.383798	8.19333		916.601	20.7763
17-14	186	677.162	13870.2	0.209015	13.8402	2.3994	1.52792	4.42888	0.153437	3.72262	0.840532	920.202	31.923	941.662	27.1824	993.097	48.7827	920.202	31.923	7.34015	5.57227		920.202	32.5599
17-14	153	793.721	15002.1	0.0420547	14.2192	2.07528	1.4965	2.78275	0.154397	1.85389	0.666208	925.564	15.984	928.963	16.9379	937.909	42.5099	925.564	15.984	1.31617	4.78644		925.564	17.3673
17-14	107	567.761	15455.8	0.414021	14.2013	2.88971	1.52356	3.16371	0.156991	1.28789	0.407081	940.033	11.2653	939.909	19.3948	940.53	59.2428	940.033	11.2653	0.0528434	6.40847		940.033	13.2238
17-14	161	431.674	12181.5	0.364345	14.1097	3.13217	1.53369	3.3866	0.157016	1.28786	0.380282	940.17	11.2666	943.976	20.8158	953.774	64.0533	940.17	11.2666	1.42627	6.72456		940.17	13.2254
17-14	116	453.507	11771.2	0.141779	14.2971	2.82453	1.5165	4.03615	0.157318	2.88314	0.71433	941.854	25.2645	937.065	24.6981	926.706	58.0141	941.854	25.2645	-1.63465	6.92207		941.854	26.1535
17-14	104	281.853	7596.64	0.0332223	13.9947	3.83382	1.54963	4.11233	0.157354	1.48764	0.36175	942.058	13.0385	950.344	25.38	970.492	78.178	942.058	13.0385	2.92988	7.93407		942.058	14.7654
17-14	136	1227.29	36547.9	0.0300424	13.8443	1.40233	1.56701	2.05248	0.15741	1.49871	0.730195	942.365	13.1395	957.245	12.7221	992.501	28.5129	942.365	13.1395	5.05152	3.032		942.365	14.8554
17-14	168	382.78	10908.6	0.0453097	13.9359	4.23788	1.56211	4.43289	0.157956	1.30036	0.293344	945.406	11.4347	955.304	27.4446	979.034	86.3298	945.406	11.4347	3.43483	8.59471		945.406	13.3872
17-14	171	264.603	6595.83	0.34996	13.9891	4.04678	1.55783	4.34484	0.158124	1.58151	0.363998	946.343	13.9198	953.605	26.8706	971.295	82.5496	946.343	13.9198	2.56897	8.40368		946.343	15.5596
17-14	163	2038.69	62208.7	0.0120793	13.8034	1.28597	1.57961	1.78567	0.158206	1.23891	0.693808	946.8	10.9093	962.216	11.1028	998.479	26.104	946.8	10.9093	5.17577	2.70915		946.8	12.9478
17-14	160	426.624	11541.5	0.40215	14.007	3.52148	1.55675	3.80089	0.158217	1.43037	0.376324	946.859	12.5959	953.177	23.4999	968.658	71.8421	946.859	12.5959	2.25039	7.36545		946.859	14.3933
17-14	196	396.788	10555.6	0.0755243	14.0688	3.31733	1.5509	3.88002	0.158318	2.01243	0.518665	947.422	17.7314	950.853	23.9538	959.674	67.755	947.422	17.7314	1.27662	7.21081		947.422	19.0357
17-14	150	270.001	8245.52	0.268064	13.9017	4.27179	1.56971	4.60571	0.158334	1.72174	0.373827	947.514	15.1714	958.31	28.5687	984.054	86.9351	947.514	15.1714	3.71318	8.64494		947.514	16.688
17-14	152	306.499	8176.09	0.0909958	14.0545	3.88592	1.55774	4.22166	0.158854	1.64985	0.390807	950.406	14.5792	953.571	26.1081	961.789	79.3468	950.406	14.5792	1.18353	8.292		950.406	16.1621
17-14	111	348.514	8184.9	0.059771	14.4859	3.88805	1.51223	4.1718	0.158946	1.51229	0.362503	950.916	13.3702	935.339	25.4996	899.699	80.1984	950.916	13.3702	-5.69265	9.53784		950.916	15.0863
17-14	148	298.811	9297.87	0.275837	14.3718	3.77903	1.5249	4.03975	0.159015	1.42776	0.353427	951.303	12.6276	940.45	24.7744	916.032	77.7133	951.303	12.6276	-3.85041	8.91754		951.303	14.4358
17-14	115	400.213	14341.3	0.253125	14.1135	3.58612	1.55859	3.92151	0.159608	1.58683	0.404646	954.597	14.0796	953.909	24.2569	953.234	73.357	954.597	14.0796	-0.142997	7.84687		954.597	15.7274
17-14	105	498.985	14602.9	0.0235175	14.0743	2.32719	1.5637	2.80032	0.159687	1.55755	0.556204	955.036	13.8257	955.936	17.3434	958.878	47.5603	955.036	13.8257	0.400749	5.14624		955.036	15.5028
17-14	143	406.281	11189	0.0808546	13.999	4.57693	1.57214	5.02585	0.15969	2.07626	0.413117	955.053	18.4305	959.272	31.1939	969.827	93.3528	955.053	18.4305	1.52335	9.6677		955.053	19.7042
17-14	108	3028	82769.1	0.0133418	13.949	1.32595	1.57832	1.90049	0.159745	1.36152	0.716404	955.36	12.0894	961.709	11.813	977.141	27.0201	955.36	12.0894	2.22911	2.97323		955.36	13.983
17-14	182	566.918	12289.3	0.308309	13.7865	2.24765	1.59932	2.55901	0.159984	1.22336	0.478059	956.69	10.8767	969.946	15.9878	1000.96	45.6406	956.69	10.8767	4.4232	4.49141		956.69	12.9572
17-14	102	360.901	8527.32	0.071921	14.007	3.41168	1.57428	3.80165	0.159999	1.6772	0.441176	956.772	14.9129	960.117	23.6074	968.657	69.6158	956.772	14.9129	1.22694	7.26369		956.772	16.4812
17-14	120	368.746	9600.55	0.0553976	13.8817	3.9897	1.58916	4.18233	0.160065	1.25467	0.299992	957.138	11.1599	965.967	26.0664	987.006	81.1777	957.138	11.1599	3.02607	8.05551		957.138	13.1967
17-14	170	366.191	8622.3	0.121904	13.6396	3.87449	1.62012	4.7203	0.160338	2.69621	0.571194	958.654	24.0172	978.038	29.6385	1022.69	78.427	958.654	24.0172	6.2611	7.56248		958.654	24.9903
17-14	138	570.857	13561.2	0.106223	14.1238	2.39109	1.56589	2.69539	0.160473	1.24411	0.461568	959.405	11.0903	956.802	16.7026	951.731	48.9354	959.405	11.0903	-0.806364	5.31256		959.405	13.1464
17-14	164	3160.6	94907.5	0.0641959	13.6933	1.17413	1.61565	1.67446	0.160526	1.19383	0.712962	959.7	10.6451	976.305	10.5021	1014.72	23.7909	959.7	10.6451	5.42197	2.45309		959.7	12.7754
17-14	159	294.485	6508.6	0.142541	13.947	4.76491	1.5875	5.39956	0.160651	2.53986	0.470383	960.392	22.6626	965.317	33.6404	977.415	97.1153	960.392	22.6626	1.74162	10.0344		960.392	23.7025
17-14	157	704.928	16690.2	0.0794155	14.0217	2.97081	1.58011	3.27248	0.16076	1.37238	0.41937	960.999	12.2526	962.414	20.3503	966.529	60.6202	960.999	12.2526	0.572184	6.3636		960.999	14.1431
17-14	139	319.776	8052.83	0.107506	14.2461	4.00028	1.55686	4.44596	0.160929	1.94019	0.436393	961.939	17.3377	953.222	27.4894	934.039	82.061	961.939	17.3377	-2.9871	9.23648		961.939	18.7086
17-14	114	691.265	17679.8	0.40908	14.1276	2.14617	1.57217	3.07523	0.161159	2.20249	0.716205	963.215	19.7059	959.282	19.0862	951.179	43.9542	963.215	19.7059	-1.26537	5.11759		963.215	20.9155
17-14	134	408.242	11274.4	0.518077	13.9526	2.59266	1.59578	3.04394	0.161553	1.59488	0.523954	965.402	14.2996	968.559	19.0013	976.612	52.8093	965.402	14.2996	1.14786	5.54224		965.402	15.9567
17-14	122	697.631	18501.1	0.0117736	14.0168	2.14712	1.58865	2.51807	0.161571	1.31549	0.52242	965.5	11.7957	965.766	15.6913	967.269	43.7845	965.5	11.7957	0.182948	4.68		965.5	13.7663
17-14	135	1167.46	32414.7	0.0227529	13.894	1.97088	1.60321	2.90502	0.161625	2.13419	0.734655	965.798	19.1422	971.465	18.1665	985.17	40.0784	965.798	19.1422	1.9663	4.43632		965.798	20.394
17-14	130	284.73	8508.9	0.119411	14.0292	4.5828	1.58938	4.93933	0.161789	1.84253	0.373032	966.71	16.5407	966.054	30.7867	965.47	93.5374	966.71	16.5407	-0.12843	9.85084		966.71	17.9885
17-14	179	325.52	10520.5	0.164874	13.5768	2.8422	1.64337	3.12727	0.16189	1.3045	0.417138	967.271	11.7171	987.008	19.7418	1032.02	57.4801	967.271	11.7171	6.27373	5.34229		967.271	13.7055
17-14	187	416.318	10708.3	0.0574533	13.7736	3.29378	1.62047	3.98103	0.161947	2.23597	0.561657	967.59	20.0896	978.171	24.9982	1002.87	66.8496	967.59	20.0896	3.51755	6.73613		967.59	21.2856
17-14	106	615.116	21810.9	0.0166474	13.8755	2.66507	1.61036	2.96082	0.162129	1.28991	0.435658	968.599	11.6007	974.25	18.5472	987.879	54.1887	968.599	11.6007	1.95172	5.505		968.599	13.6113
17-14	117	436.436	9549.6	0.104088	14.1482	3.15456	1.58023	3.66891	0.162221	1.87339	0.510614	969.108	16.8565	962.459	22.8164	948.207	64.5413	969.108	16.8565	-2.20426	7.18025		969.108	18.2845
17-14	180	782.949	20250	0.183254	13.6513	2.05348	1.64381	2.37465	0.162822	1.19256	0.502205	972.442	10.7646	987.176	14.992	1020.94	41.5718	972.442	10.7646	4.75029	4.01925		972.442	12.9229
17-14	140	409.989	10833.4	0.391816	14.1755	2.59644	1.58402	3.0481	0.162925	1.59668	0.52383	973.009	14.4202	963.95	18.973	944.233	53.1674	973.009	14.4202	-3.04758	5.99997		973.009	16.0876
17-14	131	281.227	7622.18	0.0993593	14.1182	3.70209	1.60296	4.03812	0.164206	1.61274	0.39938	980.11	14.6637	971.366	25.2515	952.539	75.7383	980.11	14.6637	-2.89445	8.32491		980.11	16.3267
17-14	188	252.84	7067.2	0.354616	13.8099	4.83992	1.65461	5.20356	0.165796	1.91108	0.367265	988.908	17.5207	991.318	32.9355	997.52	98.3416	988.908	17.5207	0.863304	9.93007		988.908	18.9473
17-14	129	263.81	6132	0.149433	14.2562	4.23981	1.60649	4.44978	0.166176	1.35073	0.303551	991.006	12.4077	972.741	27.8495	932.606	87.0169	991.006	12.4077	-6.26208	10.0037		991.006	14.3799
17-14	110	534.747	13804.4	0.0613394	14.09	3.82871	1.63382	5.08066	0.167033	3.33978	0.657351	995.744	30.8146	983.332	32.004	956.594	78.2421	995.744	30.8146	-4.09264	9.103		995.744	31.5973
17-14	137	433.904	11381.4	0.642934	13.7619	2.81938	1.67704	3.11559	0.16746	1.3259	0.425568	998.099	12.2602	999.861	19.8186	1004.59	57.1811	998.099	12.2602	0.646094	5.7854		998.099	14.2779
17-14	141	399.521	9440.67	0.105398	13.3371	3.91782	1.76143	4.83048	0.170456	2.82564	0.58496	1014.62	26.5273	1031.37	31.2886	1067.96	78.7826	1014.62	26.5273	4.9941	7.43567		1014.62	27.4977
17-14	158	421.343	13121.1	0.0860756	13.396	2.60182	1.82514	2.89937	0.177402	1.27942	0.441275	1052.77	12.427	1054.53	19.0197	1059.09	52.3946	1052.77	12.427	0.597287	5.05562		1052.77	14.6126
17-14	192	281.934	9346.52	0.31578	12.3201	2.81626	2.13135	3.18043	0.190527	1.47778	0.464648	1124.23	15.2457	1159.02	21.9814	1225.5	55.3107	1124.23	15.2457	8.26317	4.32325		1124.23	17.2872
17-14	156	349.462	11789.7	0.172367	12.4046	5.42643	2.17389	7.32945	0.195663	4.92694	0.672211	1151.98	51.9753	1172.72	50.9845	1212.09	106.808	1151.98	51.9753	4.95885	9.40893		1151.98	52.433
17-14	151	510.256	18542	0.498826	12.532	1.8566	2.28902	2.38546	0.208142	1.49782	0.627894	1218.91	16.6348	1208.91	16.8576	1191.95	36.6416	1191.95	36.6416	-2.26154	3.43946		1191.95	41.3474
17-14	123	957.94	34160.6	0.106498	11.0996	5.49101	2.68664	8.01634	0.216373	5.84041	0.728564	1262.68	66.9734	1324.79	59.3346	1427.49	104.859	1427.49	104.859	11.5453	8.0144		1427.49	104.433
17-14	193	656.503	22795.2	0.0651613	10.4589	6.23188	2.96348	8.6473	0.224894	5.99495	0.693274	1307.68	70.9557	1398.31	65.673	1540.14	117.227	1540.14	117.227	15.0934	7.93667		1540.14	115.986
17-14	191	295.499	15323.3	0.778483	9.74303	1.75997	4.01541	2.28386	0.283865	1.45551	0.637304	1610.8	20.7456	1637.32	18.5667	1672.34	32.5353	1672.34	32.5353	3.68	2.24731		1672.34	37.1372
17-14	167	843.378	40873.3	0.302054	9.66871	1.5018	4.08366	2.00428	0.286488	1.32731	0.662235	1623.96	19.0542	1651.05	16.3483	1686.48	27.7156	1686.48	27.7156	3.70758	1.9444		1686.48	33.0732
17-14	175	59.1741	2528.16	0.218835	9.60781	7.97867	4.50665	8.15487	0.314171	1.68607	0.206756	1761.2	25.9841	1732.2	67.7914	1698.14	147.076	1698.14	147.076	-3.71362	9.11204		1698.14	143.815
Analyses with >10% discordance; >5% reverse discordance; >10% for >700 Ma and 25%/50% for <700 Ma 2s uncertainty (1200 Ma cutoff for 206Pb/238U versus 207Pb/206Pb age)
17-14	103	839.388	12261.6	0.122999	17.0783	4.86009	0.607036	20.2523	0.0752224	19.6605	0.970779	467.542	88.6683	481.689	77.715	550.526	106.12	467.542	88.6683	15.0735	22.9652		467.542	88.1341
17-14	132	534.403	6839.61	0.0327897	16.1451	7.99583	0.675587	13.3261	0.0791425	10.6608	0.799992	491.003	50.4013	524.104	54.5699	672	171.091	491.003	50.4013	26.9341	20.0576		491.003	50.3438
17-14	147	444.06	10591.2	0.177026	14.3568	4.64368	1.3331	6.2467	0.13887	4.17822	0.668868	838.269	32.8431	860.229	36.2456	918.165	95.5421	838.269	32.8431	8.7017	10.1514		838.269	33.3454
17-14	166	196.432	4778.24	0.430069	14.1659	6.22862	1.49634	6.754	0.153802	2.61169	0.386688	922.243	22.4425	928.899	41.1128	945.627	127.542	922.243	22.4425	2.4729	13.3664		922.243	23.4159
17-14	173	138.339	4405.2	0.425658	14.3516	8.29228	1.50187	8.49415	0.156394	1.84081	0.216716	936.705	16.0488	931.146	51.7859	918.923	170.578	936.705	16.0488	-1.93508	19.0025		936.705	17.4568
17-14	121	135.887	3930.09	0.774897	14.7006	7.25159	1.46924	7.38368	0.156717	1.39037	0.188303	938.505	12.1433	917.815	44.6172	869.288	150.346	938.505	12.1433	-7.96245	18.7246		938.505	13.9718
17-14	142	196.832	1771.87	0.111387	15.2833	20.0589	1.41584	20.1915	0.157006	2.31039	0.114424	940.119	20.2109	895.614	120.296	788.205	422.071	940.119	20.2109	-19.2734	63.9204		940.119	21.3377
17-14	162	229.693	5779.88	0.137002	14.1588	4.89596	1.52891	5.1116	0.157071	1.46902	0.28739	940.481	12.8554	942.062	31.3813	946.654	100.247	940.481	12.8554	0.652078	10.6079		940.481	14.5994
17-14	149	169.704	5321.96	0.217704	14.0816	4.87932	1.54487	5.28551	0.157845	2.03196	0.384439	944.79	17.8572	948.449	32.5822	957.823	99.7474	944.79	17.8572	1.3606	10.4401		944.79	19.1459
17-14	172	132.684	3199.15	0.31854	14.7115	9.55523	1.48136	9.73169	0.158127	1.84481	0.189568	946.36	16.2376	922.787	59.008	867.764	198.18	946.36	16.2376	-9.05727	24.9767		946.36	17.6559
17-14	199	242.417	7082.24	0.53957	14.2155	6.91153	1.53376	7.04272	0.158201	1.353	0.192113	946.769	11.9135	944.007	43.2941	938.442	141.735	946.769	11.9135	-0.887288	15.29		946.769	13.8018
17-14	109	387.703	8633.24	0.0588625	14.0196	4.84174	1.55728	5.06523	0.158413	1.48798	0.293763	947.951	13.1172	953.387	31.3222	966.859	98.8018	947.951	13.1172	1.95564	10.1104		947.951	14.8537
17-14	178	111.458	3058.06	0.399196	13.5144	9.39035	1.61709	9.52838	0.158569	1.61597	0.169595	948.818	14.2576	976.861	59.7984	1041.32	189.609	948.818	14.2576	8.88271	16.6476		948.818	15.8689
17-14	169	166.218	4611.52	0.228723	14.7358	10.5603	1.48462	10.6603	0.158736	1.45622	0.136602	949.75	12.8598	924.119	64.6994	864.361	219.164	949.75	12.8598	-9.87885	27.9001		949.75	14.6336
17-14	198	200.557	4351.33	0.109023	14.8974	6.50467	1.46864	6.68847	0.15875	1.55724	0.232825	949.826	13.753	917.567	40.4084	841.693	135.424	949.826	13.753	-12.8471	18.2298		949.826	15.4219
17-14	185	158.388	4327.29	0.121953	14.2409	6.71222	1.5369	6.95957	0.158807	1.83897	0.264236	950.143	16.2462	945.263	42.8173	934.785	137.685	950.143	16.2462	-1.64298	15.0716		950.143	17.674
17-14	190	148.305	3798.76	0.321977	13.6059	9.59976	1.61219	9.91545	0.159159	2.48208	0.250325	952.104	21.9697	974.96	62.1569	1027.68	194.219	952.104	21.9697	7.35422	17.6389		952.104	23.0271
17-14	154	147.187	4011.12	0.110047	14.6334	10.9594	1.50045	11.059	0.159314	1.48149	0.133961	952.966	13.1241	930.57	67.4079	878.785	226.978	952.966	13.1241	-8.44124	28.0486		952.966	14.876
17-14	165	186.415	5872.1	0.330561	13.7835	7.70401	1.59323	7.85302	0.159341	1.52255	0.193881	953.115	13.4899	967.564	48.9992	1001.4	156.455	953.115	13.4899	4.82163	14.9313		953.115	15.199
17-14	155	201.53	4502.33	0.170711	14.6971	4.90311	1.49562	5.13376	0.159493	1.5215	0.296373	953.957	13.4916	928.604	31.2422	869.768	101.616	953.957	13.4916	-9.67947	12.9076		953.957	15.2032
17-14	195	245.101	7114.43	0.795243	14.1269	4.85289	1.55751	5.12729	0.159648	1.65487	0.322758	954.822	14.6866	953.478	31.7078	951.252	99.3083	954.822	14.6866	-0.375298	10.5921		954.822	16.2717
17-14	119	192.666	4875.14	0.342957	14.6329	7.79771	1.50943	7.90784	0.160262	1.31514	0.166308	958.234	11.7102	934.21	48.3067	878.844	161.451	958.234	11.7102	-9.03344	20.0746		958.234	13.6677
17-14	127	115.569	3456.89	0.456722	13.9778	8.87899	1.58545	8.96569	0.160798	1.24382	0.138731	961.21	11.1071	964.512	55.8393	972.953	181.149	961.21	11.1071	1.20697	18.4292		961.21	13.1672
17-14	184	166.096	4188.88	0.19902	14.6045	6.66875	1.51951	6.78029	0.161019	1.22483	0.180645	962.437	10.9504	938.279	41.5266	882.9	137.909	962.437	10.9504	-9.0086	17.0722		962.437	13.0403
17-14	197	209.58	4063.75	0.236575	14.2349	7.48793	1.55966	7.61352	0.161091	1.37713	0.18088	962.837	12.3168	954.332	47.113	935.676	153.63	962.837	12.3168	-2.90278	16.9469		962.837	14.2049
17-14	118	254.488	6424.47	0.346247	14.2998	5.4054	1.5575	5.5554	0.161602	1.28221	0.230804	965.674	11.4992	953.476	34.3557	926.345	111.043	965.674	11.4992	-4.24569	12.5577		965.674	13.5146
17-14	126	250.633	6658.21	0.170673	14.3417	5.96138	1.55314	6.21387	0.161621	1.75335	0.282167	965.78	15.7261	951.742	38.3866	920.337	122.623	965.78	15.7261	-4.93757	14.0856		965.78	17.2429
17-14	146	264.693	7321.9	0.0670828	14.0831	6.7411	1.58228	6.86417	0.161685	1.294	0.188516	966.132	11.6101	963.266	42.7132	957.599	137.82	966.132	11.6101	-0.89111	14.571		966.132	13.6104
17-14	124	233.684	7140.66	0.663464	14.4659	5.77914	1.54173	5.94092	0.161824	1.377	0.231782	966.906	12.3639	947.196	36.594	902.541	119.19	966.906	12.3639	-7.1315	14.214		966.906	14.2594
17-14	112	273.603	7724.94	0.0943494	14.2019	4.91809	1.57228	5.14163	0.162018	1.49958	0.291654	967.979	13.4783	959.325	31.9137	940.449	100.838	967.979	13.4783	-2.92728	11.1288		967.979	15.2361
17-14	144	280.105	9007.17	0.0930492	14.1192	6.70025	1.58341	7.16331	0.162216	2.53369	0.353705	969.078	22.7971	963.711	44.5876	952.39	137.077	969.078	22.7971	-1.75223	14.8394		969.078	23.848
17-14	183	260.187	8998.93	0.286474	14.0753	5.91554	1.58909	6.05282	0.16229	1.28176	0.211763	969.493	11.5373	965.94	37.7258	958.734	120.923	969.493	11.5373	-1.12217	12.8109		969.493	13.5606
17-14	177	183.324	5499.66	0.179354	14.3524	8.90429	1.55915	9.03845	0.162368	1.5515	0.171655	969.924	13.971	954.13	55.9275	918.796	183.167	969.924	13.971	-5.56465	21.0998		969.924	15.678
17-14	200	204.442	4898.63	0.153504	14.5066	6.2119	1.5426	6.36256	0.16237	1.37638	0.216325	969.936	12.3942	947.542	39.2004	896.755	128.222	969.936	12.3942	-8.1606	15.5269		969.936	14.296
17-14	176	284.369	6471.15	0.0892377	14.2119	4.79845	1.57682	5.01506	0.162601	1.45801	0.290726	971.212	13.1453	961.116	31.1629	938.96	98.4134	971.212	13.1453	-3.43487	10.9311		971.212	14.9538
17-14	194	166.507	4489.85	0.170073	13.7608	9.64023	1.63206	9.76389	0.162955	1.54905	0.15865	973.177	13.9922	982.653	61.493	1004.75	195.768	973.177	13.9922	3.14222	18.9234		973.177	15.707
17-14	145	292.418	7818.13	0.146092	14.091	6.35007	1.61559	6.70109	0.165181	2.14038	0.319408	985.506	19.5604	976.281	42.0339	956.455	129.84	985.506	19.5604	-3.0374	14.1362		985.506	20.8314
17-14	125	116.074	2954.12	0.404771	14.6892	8.58369	1.55215	8.822	0.165431	2.03661	0.230856	986.89	18.6362	951.347	54.4914	870.902	177.956	986.89	18.6362	-13.3181	23.2536		986.89	19.9738
17-14	189	186.829	5847.08	0.374418	14.1108	6.70954	1.6272	6.91521	0.166602	1.67396	0.24207	993.362	15.4107	980.777	43.496	953.618	137.244	993.362	15.4107	-4.16768	15.0785		993.362	17.0366
17-14	101	131.933	3837.35	0.0972889	14.0348	9.18266	1.65097	10.4056	0.168125	4.89433	0.470357	1001.77	45.4105	989.924	65.8237	964.661	187.627	1001.77	45.4105	-3.847	20.7395		1001.77	45.8417
17-14	128	224.059	5459.02	0.364071	14.3214	8.10428	1.63639	8.19674	0.170043	1.22766	0.149774	1012.35	11.5015	984.323	51.6704	923.251	166.565	1012.35	11.5015	-9.65047	19.8214		1012.35	13.6865
Sample 17-16			(Analyzed October_28_2020; 300/hr; 20 µm spot)
			Systematic errors (2σ): 206Pb/238U=	1.02275
			206Pb/207Pb=	1.2212
17-16	142	1686.7	30170.5	0.212984	17.9718	3.71653	0.513564	5.46535	0.0678173	3.7513	0.68638	422.992	15.3583	420.843	18.8301	410.036	88.9063	422.992	15.3583	-3.15978	22.6791		422.992	15.8993
17-16	207	1855.11	33242.1	0.394278	17.7492	3.27313	0.529689	5.29216	0.0685809	4.09801	0.774355	427.6	16.9546	431.603	18.6077	454.011	74.3309	427.6	16.9546	5.81709	15.8654		427.6	17.451
17-16	475	6189.58	41059.6	0.470033	17.624	1.4012	0.580094	2.23783	0.0732912	1.67205	0.747171	455.954	7.36038	464.522	8.34211	508.082	32.6666	455.954	7.36038	10.2599	5.94882		455.954	8.62238
17-16	64	4551.93	101100	0.640806	17.5799	1.40825	0.590917	2.02511	0.0763783	1.36518	0.674128	474.469	6.24474	471.453	7.63765	457.745	33.2095	474.469	6.24474	-3.6534	7.64281		474.469	7.79809
17-16	439	1216.94	9197.67	0.34143	17.2801	3.14428	0.625523	4.45208	0.079148	1.64179	0.36877	491.035	7.76239	493.303	17.3962	504.796	91.0461	491.035	7.76239	2.72599	17.6118		491.035	9.13888
17-16	284	472.69	13876.1	0.0738782	16.8956	5.36583	0.647607	6.4201	0.0803865	3.43576	0.535156	498.43	16.4795	507.005	25.6244	546.808	118.456	498.43	16.4795	8.84734	19.9752		498.43	17.1713
17-16	385	1066.07	7054.42	0.597737	17.4802	3.32951	0.659389	4.45364	0.0830561	1.53642	0.344981	514.339	7.59538	514.24	17.9701	514.738	91.8218	514.339	7.59538	0.0775825	17.8857		514.339	9.11787
17-16	159	1031.55	22914.5	0.31741	16.6033	3.1063	0.783239	3.59391	0.0962663	1.51362	0.421163	592.491	8.56828	587.33	16.0284	568.4	70.9229	592.491	8.56828	-4.23849	13.0936		592.491	10.3326
17-16	158	1802.03	43968.6	0.100027	15.7376	3.18188	0.928602	8.48249	0.107602	7.83522	0.923693	658.804	49.069	666.899	41.4764	695.259	69.3048	658.804	49.069	5.24342	11.791		658.804	49.296
17-16	514	1873.17	2271.47	0.153071	13.9376	1.76621	1.06313	3.37043	0.115761	2.25003	0.667581	706.121	15.0487	735.366	17.6354	826.422	52.3879	706.121	15.0487	14.5568	5.71425		706.121	16.5093
17-16	559	1202.85	14805.9	0.100086	14.8734	1.96252	1.08116	4.23804	0.116822	2.83607	0.669193	712.248	19.1239	744.202	22.3562	842.483	65.556	712.248	19.1239	15.4585	6.95904		712.248	20.2974
17-16	140	1391.16	25343.5	0.0879986	14.3219	1.96912	1.27938	8.16885	0.134552	7.893	0.966231	813.783	60.3434	836.576	46.5639	898.464	43.4629	813.783	60.3434	9.4251	8.01912		813.783	60.5621
17-16	195	799.63	30153.7	0.130186	14.4099	2.56694	1.34751	5.52612	0.138782	4.8541	0.878391	837.769	38.1346	866.482	32.2115	941.548	54.0835	837.769	38.1346	11.0221	6.52122		837.769	38.8545
17-16	84	1262.37	36817.8	0.161546	13.8031	1.74521	1.40767	3.92762	0.141912	3.4966	0.890259	855.466	28.0125	892.174	23.3175	985.15	36.3837	855.466	28.0125	13.1639	4.28608		855.466	29.1203
17-16	244	592.251	22945.3	0.295863	14.6748	3.67195	1.32299	4.33519	0.142493	1.71301	0.395141	858.747	13.7727	855.82	25.0709	849.13	82.8399	858.747	13.7727	-1.13261	9.99878		858.747	16.0208
17-16	598	2774.9	31706.2	0.101058	14.2629	2.46789	1.40358	6.8036	0.143868	6.29712	0.925557	866.498	51.0564	890.451	40.3464	951.291	52.7297	866.498	51.0564	8.91353	7.36863		866.498	51.5188
17-16	276	7195.82	322102	0.00550741	14.0012	1.23021	1.42423	2.07832	0.144776	1.67222	0.804603	871.611	13.6329	899.135	12.3981	968.3	25.1845	871.611	13.6329	9.98548	2.73192		871.611	15.9608
17-16	120	1141.65	44145.5	0.106954	14.1342	2.96079	1.43942	4.29781	0.14727	3.07829	0.716245	885.644	25.4728	905.479	25.7515	955.052	61.3333	885.644	25.4728	7.26753	6.52525		885.644	26.7862
17-16	157	800.737	29398.2	0.215945	13.5852	2.74277	1.46691	7.47455	0.147777	6.91684	0.925386	888.492	57.4089	916.858	45.1375	986.67	57.6545	888.492	57.4089	9.95046	7.84487		888.492	57.773
17-16	315	1127.96	15786.6	0.0352883	14.1204	1.78309	1.46402	2.50891	0.14912	1.49451	0.595683	896.028	12.5023	915.665	15.1365	964.203	41.1331	896.028	12.5023	7.07063	4.17105		896.028	15.1317
17-16	346	2908.27	11863.5	0.280202	13.8634	1.37448	1.51518	3.2249	0.150877	1.96285	0.608655	905.878	16.5882	936.533	19.7267	1010.23	51.8821	905.878	16.5882	10.3293	4.88919		905.878	18.6779
17-16	335	660.375	6973.1	0.647288	14.192	2.27463	1.47535	4.011	0.151953	2.38019	0.593414	911.902	20.2397	920.323	24.2751	941.475	66.1904	911.902	20.2397	3.1411	7.14095		911.902	21.9915
17-16	473	630.799	8300.63	0.316838	13.9583	2.86163	1.50003	3.68499	0.152095	1.98291	0.538105	912.697	16.8752	930.397	22.4511	973.479	63.2997	912.697	16.8752	6.24375	6.33809		912.697	18.9597
17-16	268	1173.48	53482.2	0.134198	14.1866	1.47827	1.48848	2.21351	0.153644	1.61053	0.72759	921.357	13.8271	925.696	13.4439	936.932	31.124	921.357	13.8271	1.6623	3.58458		921.357	16.3588
17-16	57	1300.47	60086.3	0.0516904	13.9625	1.32246	1.48604	1.97841	0.153717	1.44998	0.732902	921.767	12.4538	924.701	12.0081	932.6	27.5788	921.767	12.4538	1.16153	3.21345		921.767	15.2222
17-16	570	682.239	8740.32	0.0714112	13.7272	2.63532	1.53099	3.83598	0.154164	1.67577	0.436857	924.264	14.4294	942.895	23.5617	987.548	70.2126	924.264	14.4294	6.40827	6.81271		924.264	16.8824
17-16	28	443.454	16969	0.154514	14.3232	4.12885	1.47176	4.46501	0.154547	1.44351	0.323293	926.399	12.4562	918.853	26.9966	901.653	87.1428	926.399	12.4562	-2.74449	10.0257		926.399	15.2478
17-16	132	2172.13	73001.4	0.831995	13.4613	1.62288	1.60589	4.85452	0.154703	4.56828	0.941036	927.27	39.4547	972.507	30.3786	1077.05	32.9671	927.27	39.4547	13.9064	4.5126		927.27	40.305
17-16	562	801.416	10773.9	0.0512538	14.2165	3.04626	1.48029	4.31065	0.154833	1.40912	0.326894	927.999	12.179	922.349	26.1241	909.74	83.9141	927.999	12.179	-2.00704	9.50386		927.999	15.0313
17-16	412	490.906	6565.19	0.134408	14.2665	3.35216	1.48099	4.55851	0.155504	2.15407	0.472538	931.744	18.6874	922.635	27.6316	901.799	82.8627	931.744	18.6874	-3.32062	9.71725		931.744	20.6537
17-16	146	1042.39	33616.9	0.247102	13.7699	1.90691	1.55546	2.46381	0.156482	1.33071	0.540103	937.195	11.6072	952.664	15.2277	989.433	42.1739	937.195	11.6072	5.27959	4.20436		937.195	14.6228
17-16	115	741.676	27058.1	0.0746341	13.6807	2.33962	1.57796	4.29271	0.156489	3.55266	0.827603	937.235	30.9895	961.566	26.6813	1018.49	48.7594	937.235	30.9895	7.97823	5.35406		937.235	32.1676
17-16	225	1191.45	26106.6	0.155546	14.1406	1.72772	1.54377	2.46099	0.157349	1.54216	0.62664	942.029	13.516	948.008	15.1654	962.825	39.2119	942.029	13.516	2.15989	4.22467		942.029	16.1978
17-16	516	657.984	8566.76	0.0565953	13.7687	2.59349	1.57628	3.26541	0.158227	1.49261	0.457097	946.916	13.1447	960.903	20.2872	993.916	59.0018	946.916	13.1447	4.7288	5.80815		946.916	15.9148
17-16	75	722.205	26834.1	0.118693	13.8646	2.29448	1.55985	3.42597	0.158277	2.45059	0.715296	947.192	21.587	954.406	21.1981	971.942	48.8665	947.192	21.587	2.54644	5.37958		947.192	23.3493
17-16	494	3348.13	45123.6	0.0813334	14.0143	1.31657	1.56889	2.09478	0.158309	1.43091	0.683084	947.371	12.607	957.986	12.9904	983.342	31.1247	947.371	12.607	3.65809	3.30795		947.371	15.4776
17-16	447	665.515	8732.3	0.112088	14.0201	2.44692	1.54988	3.46264	0.158396	1.45384	0.419864	947.858	12.8151	950.444	21.3713	957.306	64.2446	947.858	12.8151	0.986937	6.77825		947.858	15.6495
17-16	174	292.685	14055.4	0.183812	13.8662	4.65398	1.56504	5.94867	0.158397	3.53673	0.594541	947.86	31.1752	956.463	36.8577	977.18	97.4857	947.86	31.1752	3.00047	10.1892		947.86	32.3711
17-16	582	593.306	7830.38	0.241721	14.0488	2.47596	1.53988	3.62145	0.15863	1.36598	0.377191	949.161	12.056	946.457	22.2948	941.083	68.7442	949.161	12.056	-0.858332	7.47804		949.161	15.0433
17-16	208	768.385	25707.5	0.113501	14.0992	2.47322	1.5541	3.20932	0.158743	1.92047	0.598403	949.788	16.9603	952.126	19.8289	958.404	52.5151	949.788	16.9603	0.898983	5.71125		949.788	19.1868
17-16	588	510.036	5983.45	0.388319	14.6814	3.04913	1.47375	5.13861	0.158868	3.68742	0.71759	950.481	32.5869	919.67	31.0869	847.388	74.47	950.481	32.5869	-12.166	10.5809		950.481	33.7287
17-16	117	843.226	35900.4	0.142449	13.6868	1.8528	1.60594	2.44668	0.159051	1.54985	0.633452	951.501	13.7101	972.529	15.3102	1021.2	38.325	951.501	13.7101	6.82557	3.74564		951.501	16.4054
17-16	521	378.606	5032.06	0.237581	13.5767	3.89919	1.58249	5.0989	0.159173	1.63288	0.320241	952.179	14.4542	963.349	31.7281	989.796	98.225	952.179	14.4542	3.80046	9.65766		952.179	17.0329
17-16	86	459.361	22102.5	0.0756323	13.8112	3.60958	1.57512	4.02814	0.159459	1.54928	0.384614	953.769	13.7354	960.449	25.0192	976.661	75.7897	953.769	13.7354	2.34392	7.70758		953.769	16.4374
17-16	138	381.41	15663.9	0.094272	13.7855	3.63307	1.57784	3.97413	0.159468	1.34293	0.33792	953.821	11.9066	961.521	24.7002	980.039	76.1602	953.821	11.9066	2.67518	7.6602		953.821	14.9491
17-16	71	672.928	32992.7	0.0660304	13.8043	2.38747	1.58266	2.98997	0.159493	1.6844	0.56335	953.958	14.9361	963.414	18.6049	985.956	50.2413	953.958	14.9361	3.24538	5.1578		953.958	17.4502
17-16	29	602.121	22943	0.292993	13.7552	2.47757	1.58821	3.05876	0.159548	1.36898	0.447561	954.266	12.1428	965.596	19.0589	992.345	55.5784	954.266	12.1428	3.8373	5.52305		954.266	15.1396
17-16	145	479.233	21009.8	0.133454	14.2199	2.47331	1.53227	3.29038	0.159804	2.00164	0.608332	955.689	17.7791	943.41	20.2169	915.773	53.6945	955.689	17.7791	-4.35869	6.41947		955.689	19.9346
17-16	454	964.609	13215.8	0.205427	13.9663	2.21619	1.592	2.86496	0.16017	1.3625	0.475574	957.721	12.1259	967.083	17.8677	989.288	51.2292	957.721	12.1259	3.19087	5.16083		957.721	15.1443
17-16	32	1097.75	49470.9	0.421473	13.913	1.62267	1.58648	2.06048	0.160469	1.1945	0.57972	959.38	10.6478	964.917	12.833	978.429	34.1715	959.38	10.6478	1.94691	3.59325		959.38	14.0024
17-16	572	752.323	7275.84	0.231541	13.9948	2.01974	1.55645	4.40044	0.16062	2.01575	0.458079	960.219	17.9831	953.058	27.205	937.454	80.2259	960.219	17.9831	-2.42838	8.97311		960.219	20.1339
17-16	491	419.948	5581.75	0.288734	13.9523	3.269	1.5549	4.55685	0.160642	1.56783	0.34406	960.343	13.9887	952.443	28.1612	935.147	87.732	960.343	13.9887	-2.69427	9.74983		960.343	16.6804
17-16	552	556.821	6814.89	0.100718	13.9619	2.69489	1.58866	4.17473	0.160811	1.28505	0.307817	961.283	11.4761	965.772	26.0159	976.901	80.9375	961.283	11.4761	1.59865	8.23688		961.283	14.6505
17-16	116	403.608	17478.6	0.0832072	14.1851	4.25722	1.55778	4.8599	0.160896	1.70993	0.351844	961.755	15.2774	953.586	30.056	935.682	93.3281	961.755	15.2774	-2.78652	10.3815		961.755	17.7771
17-16	236	1229.85	46386.8	0.0724958	13.9479	1.73111	1.58985	2.2661	0.161559	1.42679	0.629621	965.434	12.7928	966.238	14.1253	968.938	35.9032	965.434	12.7928	0.361609	3.92099		965.434	15.7209
17-16	461	791.087	14146.1	0.0642972	13.9728	2.06169	1.60345	3.39832	0.162048	1.71553	0.504817	968.146	15.4218	971.556	21.2528	980.144	59.7558	968.146	15.4218	1.22416	6.22416		968.146	17.9295
17-16	155	397.354	15040.5	0.0751665	14.0727	4.33597	1.54849	4.61025	0.162081	1.46132	0.316973	968.33	13.1389	949.893	28.4452	908.29	90.052	968.33	13.1389	-6.61021	10.6684		968.33	16.0173
17-16	250	351.791	13375.4	0.201274	14.0477	3.62006	1.57493	4.41333	0.162239	1.71436	0.388452	969.208	15.427	960.374	27.4106	941.111	83.3876	969.208	15.427	-2.98548	9.27115		969.208	17.9387
17-16	77	1099.86	39607.4	0.181265	13.9848	1.66261	1.5915	2.23062	0.162507	1.27407	0.571172	970.696	11.4812	966.884	13.9097	959.098	37.3953	970.696	11.4812	-1.20928	4.12373		970.696	14.7061
17-16	299	545.731	22149.5	0.100859	14.0007	3.23392	1.59248	3.68583	0.162812	1.44341	0.39161	972.386	13.0282	967.27	22.9902	956.532	69.3273	972.386	13.0282	-1.65745	7.49274		972.386	15.9475
17-16	94	619.733	24103.9	0.0592328	13.8631	2.57919	1.60004	3.13999	0.162892	1.71931	0.547554	972.828	15.5251	970.224	19.621	965.241	53.6832	972.828	15.5251	-0.786056	5.83155		972.828	18.039
17-16	368	516.897	8526.13	0.206414	13.8591	3.18767	1.61667	3.63545	0.163238	1.47672	0.406201	974.744	13.3589	976.699	22.8075	982.004	67.616	974.744	13.3589	0.739259	6.96869		974.744	16.2295
17-16	363	552.891	8618.55	0.456809	13.3722	3.12663	1.67452	6.63038	0.163495	4.31406	0.650651	976.17	39.0792	998.904	42.1575	1050.04	101.495	976.17	39.0792	7.03525	9.72597		976.17	40.0377
17-16	214	576.067	22439.5	0.137096	13.8179	2.31408	1.64761	3.002	0.163677	1.498	0.499002	977.179	13.5827	988.635	18.9694	1015.01	52.6978	977.179	13.5827	3.72756	5.17433		977.179	16.4256
17-16	359	561.938	7720.13	0.20536	14.1027	2.84956	1.59655	3.59844	0.164051	1.25737	0.349421	979.247	11.4232	968.862	22.4672	946.284	69.0819	979.247	11.4232	-3.4835	7.65049		979.247	14.7082
17-16	269	626.226	39379	0.550086	13.6101	2.76177	1.65599	3.25172	0.164339	1.64181	0.504905	980.846	14.9384	991.843	20.5868	1017.11	56.8738	980.846	14.9384	3.56551	5.58876		980.846	17.5758
17-16	92	795.266	35130.3	0.192418	13.8099	2.18888	1.62941	2.84438	0.16441	1.66602	0.585724	981.24	15.1643	981.63	17.8979	983.41	46.9007	981.24	15.1643	0.220691	5.00227		981.24	17.7692
17-16	111	420.671	21366	0.0574814	14.1294	3.2785	1.58274	3.564	0.165143	1.27682	0.358254	985.293	11.6661	963.449	22.1776	914.843	68.4718	985.293	11.6661	-7.70081	8.16115		985.293	14.9301
17-16	252	895.74	41066.7	0.550956	13.9896	4.23693	1.63324	7.32024	0.165518	5.94576	0.812236	987.368	54.432	983.11	46.1094	974.483	87.0662	987.368	54.432	-1.32229	10.6373		987.368	54.9958
17-16	229	582.605	28246.6	0.0681025	13.5175	2.9582	1.68679	3.93092	0.165766	2.43596	0.619693	988.743	22.3293	1003.55	25.0596	1036.89	62.3468	988.743	22.3293	4.6437	6.1247		988.743	24.1721
17-16	324	387.796	5947.33	0.40837	13.1974	4.36528	1.71033	4.98845	0.166108	1.7439	0.349588	990.631	16.0137	1012.41	31.966	1060.72	94.0623	990.631	16.0137	6.60747	8.41834		990.631	18.5378
17-16	220	439.809	17855.7	0.259311	14.1017	3.0083	1.63387	3.77776	0.166638	1.31375	0.34776	993.562	12.0968	983.352	23.7962	961.537	72.3618	993.562	12.0968	-3.33062	7.8774		993.562	15.3121
17-16	534	683.479	5451.06	0.71097	13.6827	2.34469	1.65291	3.66395	0.167091	1.7985	0.490862	996.061	16.5987	990.667	23.1807	979.609	65.0344	996.061	16.5987	-1.67937	6.95972		996.061	19.0667
17-16	9	1028.57	48053.5	0.13157	13.3654	1.67149	1.71715	2.19725	0.167405	1.37384	0.625252	997.799	12.6999	1014.96	14.0998	1053.07	34.5842	997.799	12.6999	5.24832	3.3373		997.799	15.8133
17-16	554	704.518	9622	0.0876431	14.0478	2.05998	1.6436	3.2664	0.167545	1.39467	0.426975	998.573	12.9018	987.096	20.6212	962.576	60.3454	998.573	12.9018	-3.73961	6.64027		998.573	15.9793
17-16	553	1856.39	29840.6	0.416574	14.1065	1.3979	1.66116	2.35072	0.167626	1.80137	0.766303	999.018	16.6709	993.818	14.8998	983.262	30.7384	999.018	16.6709	-1.60238	3.60044		999.018	19.142
17-16	318	941.456	11950.4	0.0421029	13.7377	1.87338	1.68378	2.82978	0.167875	1.34105	0.473908	1000.39	12.4266	1002.41	18.0273	1007.7	50.5105	1000.39	12.4266	0.724966	5.12666		1000.39	15.6092
17-16	292	501.521	24864.6	0.0936115	13.8308	3.54993	1.6763	4.33367	0.16893	2.06107	0.475595	1006.21	19.2012	999.579	27.5632	985.955	77.5913	1006.21	19.2012	-2.0546	8.26408		1006.21	21.3997
17-16	254	2663.02	86648	0.035724	14.0576	1.38038	1.66908	2.77847	0.169843	2.4	0.863784	1011.24	22.462	996.834	17.6425	966.175	28.5407	1011.24	22.462	-4.66479	3.86834		1011.24	24.3704
17-16	593	445.002	6493.61	0.273821	13.0621	3.09808	1.76877	6.10826	0.169899	4.23999	0.694141	1011.56	39.6942	1034.07	39.6266	1082.85	88.1948	1011.56	39.6942	6.58397	8.44547		1011.56	40.7038
17-16	128	620.446	25924.7	0.133746	14.2046	2.57991	1.65791	3.43522	0.170217	2.20944	0.643173	1013.31	20.7175	992.577	21.7581	947.907	53.8288	1013.31	20.7175	-6.89954	6.45197		1013.31	22.7892
17-16	113	309.043	14660.6	0.202367	13.8716	4.23655	1.68214	4.90079	0.170228	1.78388	0.363999	1013.37	16.7281	1001.79	31.2112	977.407	93.033	1013.37	16.7281	-3.67928	10.0159		1013.37	19.2536
17-16	96	357.297	15737.2	0.148641	13.3522	4.63513	1.73576	5.75926	0.170816	3.31261	0.57518	1016.61	31.1552	1021.89	37.1071	1034.09	95.2022	1016.61	31.1552	1.69052	9.53903		1016.61	32.5241
17-16	200	1081.11	47123.5	0.497245	13.9725	1.63057	1.69947	2.37872	0.17108	1.67193	0.70287	1018.06	15.7452	1008.33	15.206	988.131	34.4108	1018.06	15.7452	-3.02857	3.9258		1018.06	18.4312
17-16	114	3291.06	120524	0.275432	13.9601	1.54704	1.70071	2.26079	0.171149	1.63829	0.724651	1018.44	15.4338	1008.8	14.4561	988.792	31.6543	1018.44	15.4338	-2.99853	3.64808		1018.44	18.1687
17-16	98	691.583	27990.4	0.280718	13.3563	2.4683	1.75085	3.22193	0.171437	1.92697	0.598081	1020.02	18.1794	1027.48	20.823	1044.24	52.1283	1020.02	18.1794	2.3187	5.17771		1020.02	20.5485
17-16	51	341.013	12545.4	0.809946	13.3369	4.82138	1.72036	5.14843	0.171535	1.36954	0.266012	1020.56	12.9268	1016.16	33.0625	1007.54	100.726	1020.56	12.9268	-1.29282	10.2074		1020.56	16.1135
17-16	80	559.056	29440.9	0.22009	13.8286	1.99323	1.71554	2.92026	0.172927	2.02581	0.693707	1028.22	19.2534	1014.36	18.7331	985.45	42.7728	1028.22	19.2534	-4.33993	4.93227		1028.22	21.532
17-16	3	547.888	30185.7	0.0240232	13.3251	2.48304	1.77693	2.94863	0.173173	1.42503	0.483285	1029.57	13.56	1037.06	19.1588	1053.78	52.0016	1029.57	13.56	2.29702	4.9902		1029.57	16.6694
17-16	22	284.612	13349.3	0.260356	13.4626	4.75888	1.76063	5.04079	0.174012	1.38484	0.274726	1034.18	13.2319	1031.08	32.6457	1025.37	98.0777	1034.18	13.2319	-0.858639	9.73313		1034.18	16.4284
17-16	546	613.18	8439.42	0.142315	12.8802	2.52419	1.84782	3.44196	0.174068	1.83684	0.533662	1034.49	17.5556	1062.65	22.6778	1121.83	58.0842	1034.49	17.5556	7.78568	5.02444		1034.49	20.0623
17-16	156	467.834	24041.3	0.284345	13.0536	2.95281	1.81068	3.35968	0.174796	1.44871	0.431207	1038.48	13.8954	1049.32	21.9773	1072.86	60.9085	1038.48	13.8954	3.20445	5.64585		1038.48	16.9868
17-16	432	1156.04	15687.8	0.325202	13.5723	1.54639	1.78653	2.29108	0.174878	1.32364	0.577735	1038.93	12.7008	1040.56	14.9151	1044.85	37.7595	1038.93	12.7008	0.565862	3.79347		1038.93	16.0306
17-16	147	275.311	11033	0.297748	13.1079	4.61412	1.81022	5.12655	0.175302	1.59146	0.310436	1041.26	15.3022	1049.16	33.534	1066.53	98.0294	1041.26	15.3022	2.3698	9.08755		1041.26	18.164
17-16	69	1070.04	20533.4	0.0296954	13.2096	1.78654	1.81703	2.88089	0.175783	1.5309	0.5314	1043.9	14.7542	1051.62	18.8686	1068.57	49.055	1043.9	14.7542	2.30899	4.69245		1043.9	17.7195
17-16	470	494.86	9067.41	0.122192	13.0293	2.26345	1.86592	3.5699	0.175999	1.12371	0.314774	1045.08	10.8412	1069.09	23.6012	1119.28	67.5711	1045.08	10.8412	6.6297	5.71937		1045.08	14.6426
17-16	265	672.7	37908.4	0.019301	13.1635	2.15727	1.83703	2.9713	0.176035	1.99466	0.671309	1045.27	19.2471	1058.8	19.5363	1087.68	44.1011	1045.27	19.2471	3.89826	4.27955		1045.27	21.5935
17-16	256	561.204	26362.9	0.456595	13.3097	2.63342	1.82244	3.28335	0.176441	1.65985	0.505535	1047.5	16.0478	1053.56	21.5274	1067.04	56.9923	1047.5	16.0478	1.83109	5.45479		1047.5	18.8221
17-16	298	704.314	35781.6	0.334458	13.4798	1.98426	1.80655	2.53407	0.176701	1.40398	0.55404	1048.93	13.591	1047.83	16.5629	1046.44	42.5817	1048.93	13.591	-0.23773	4.28065		1048.93	16.7929
17-16	1	412.091	24119.5	0.384303	13.1309	3.11645	1.83388	3.67911	0.176895	1.44439	0.392593	1049.99	13.9953	1057.67	24.1759	1074.45	67.9535	1049.99	13.9953	2.27702	6.31623		1049.99	17.1258
17-16	184	414.344	22117	0.201788	13.1387	3.77131	1.90172	4.91872	0.177704	3.09388	0.629001	1054.42	30.0943	1081.69	32.7349	1137.93	76.096	1054.42	30.0943	7.33882	6.73723		1054.42	31.6183
17-16	380	812.377	12797.3	0.279983	13.2207	2.10754	1.91194	3.86013	0.178171	1.40595	0.364222	1056.98	13.7062	1085.26	25.7364	1143.36	71.5009	1056.98	13.7062	7.55498	5.90411		1056.98	16.9268
17-16	505	1785.15	32180.3	0.00714199	13.1889	1.30099	1.87194	1.89093	0.178241	1.19641	0.632707	1057.36	11.6673	1071.22	12.5149	1100.41	29.2937	1057.36	11.6673	3.9125	2.76895		1057.36	15.3311
17-16	107	892.587	31971.4	0.0108743	13.3278	2.1606	1.81383	3.04145	0.178399	2.06684	0.679557	1058.22	20.1709	1050.46	19.9078	1035.22	45.1111	1058.22	20.1709	-2.2213	4.86192		1058.22	22.4662
17-16	261	567.417	26995.2	0.0800199	13.8448	2.65446	1.76846	4.02198	0.178618	2.85062	0.708761	1059.42	27.8491	1033.96	26.0886	981.393	57.7811	1059.42	27.8491	-7.95062	6.96048		1059.42	29.5195
17-16	226	829.968	30362.8	0.510639	13.7937	2.44151	1.79986	4.62065	0.178724	3.82669	0.828171	1060	37.4036	1045.41	30.1625	1015.9	52.4692	1060	37.4036	-4.34099	6.52666		1060	38.6005
17-16	55	679.454	29937.9	0.314107	13.2951	2.03457	1.81587	2.81968	0.179357	1.80335	0.639557	1063.46	17.6795	1051.2	18.4635	1026.67	43.8816	1063.46	17.6795	-3.58378	4.75046		1063.46	20.293
17-16	503	963.886	15432.8	1.61349	13.2779	1.62848	1.85958	2.64322	0.179416	1.48458	0.561658	1063.78	14.5585	1066.84	17.4537	1073.99	43.9064	1063.78	14.5585	0.950524	4.27017		1063.78	17.6547
17-16	165	409.436	16871.5	0.33274	12.9857	2.98066	1.89152	3.87203	0.179718	1.97061	0.508934	1065.43	19.3523	1078.12	25.7204	1104.73	66.634	1065.43	19.3523	3.55738	6.07516		1065.43	21.7667
17-16	266	746.811	39260.2	0.172954	12.8448	2.18719	1.93332	2.59432	0.180723	1.36461	0.525999	1070.92	13.4646	1092.69	17.3624	1137.21	43.8976	1070.92	13.4646	5.82863	3.8231		1070.92	16.8046
17-16	381	547.888	8461.05	0.263314	13.286	2.92938	1.92022	3.90959	0.181236	2.15639	0.551564	1073.72	21.3282	1088.15	26.1049	1118.02	65.0628	1073.72	21.3282	3.96185	5.90553		1073.72	23.5623
17-16	294	518.901	28597.3	0.137211	12.6442	3.30714	1.97915	9.06553	0.181747	8.41081	0.927779	1076.51	83.3881	1108.43	61.1703	1172.49	66.9548	1076.51	83.3881	8.18595	8.83576		1076.51	83.4586
17-16	354	861.228	4359.58	0.791915	11.763	1.93285	2.12653	7.72433	0.184029	5.00309	0.647705	1088.95	50.1283	1157.46	53.3581	1288.92	114.539	1088.95	50.1283	15.5146	8.45525		1088.95	50.9628
17-16	177	228.665	13298.9	0.242506	12.016	4.06459	2.11019	8.72168	0.184819	7.64765	0.876855	1093.25	76.9035	1152.14	60.1024	1265.53	81.8922	1093.25	76.9035	13.6137	8.25685		1093.25	77.124
17-16	59	342.488	18274.4	0.344392	13.1114	2.84368	1.89203	3.17784	0.185018	1.12468	0.353913	1094.33	11.3197	1078.29	21.1107	1046.92	59.9727	1094.33	11.3197	-4.52868	6.08476		1094.33	15.2822
17-16	95	876.973	37449.6	0.0880728	11.8969	2.70709	2.12928	7.30367	0.185278	6.72737	0.921094	1095.74	67.7907	1158.35	50.4718	1278.27	55.4035	1095.74	67.7907	14.2793	6.47526		1095.74	68.2069
17-16	139	500.371	15920.7	0.490169	11.9593	2.2151	2.10809	3.89699	0.185599	3.02009	0.774979	1097.49	30.4773	1151.45	26.8399	1255.35	48.1296	1097.49	30.4773	12.575	4.13871		1097.49	32.0975
17-16	428	468.16	9323.37	0.00697349	12.7356	2.81136	2.00547	3.6852	0.186147	1.50996	0.409737	1100.47	15.2758	1117.36	24.9699	1151.23	66.7493	1100.47	15.2758	4.40892	5.69909		1100.47	18.4237
17-16	89	245.688	10305.1	0.321124	12.9925	4.63588	1.94004	5.4445	0.186469	1.72043	0.315994	1102.22	17.4304	1095.01	36.4831	1081.58	103.637	1102.22	17.4304	-1.90872	9.89701		1102.22	20.2459
17-16	82	342.945	19815.7	0.293607	12.8567	3.72444	1.98955	4.05687	0.186922	1.4952	0.368559	1104.68	15.1794	1111.97	27.4155	1127.1	75.1217	1104.68	15.1794	1.98891	6.66988		1104.68	18.3647
17-16	395	665.823	11806.8	0.518123	12.8353	2.06568	2.04471	2.88569	0.188167	1.22422	0.424237	1111.44	12.4981	1130.53	19.6779	1168.24	51.7529	1111.44	12.4981	4.8619	4.34828		1111.44	16.2651
17-16	20	258.083	5609.72	0.535222	11.6836	4.52802	2.16238	5.23783	0.188331	1.91781	0.366145	1112.33	19.5933	1169.04	36.3702	1276.48	95.052	1112.33	19.5933	12.8597	6.66791		1112.33	22.1672
17-16	347	633.306	10189.4	0.556988	12.3676	2.09927	2.12604	3.38502	0.188951	1.37529	0.406287	1115.69	14.0896	1157.3	23.3769	1236.94	60.6525	1115.69	14.0896	9.80274	4.56707		1115.69	17.5347
17-16	60	340.942	19151	0.0498927	12.6471	3.91753	2.00873	8.28158	0.189313	7.1215	0.859921	1117.65	73.0767	1118.46	56.1555	1120.92	84.2743	1117.65	73.0767	0.291715	9.93464		1117.65	73.4062
17-16	130	845.546	55569.7	0.278944	12.7345	2.11074	2.08228	3.0304	0.189883	2.08236	0.687156	1120.74	21.4218	1142.99	20.788	1186.33	43.527	1120.74	21.4218	5.52895	3.90832		1120.74	23.822
17-16	589	414.986	6502.65	0.351871	12.948	3.50091	2.01359	5.44878	0.190162	1.69559	0.311187	1122.25	17.4645	1120.1	36.9712	1116.81	103.312	1122.25	17.4645	-0.487024	9.4263		1122.25	20.3634
17-16	203	540.481	9810.04	0.316001	12.7642	2.28665	2.03917	4.44053	0.190603	2.21651	0.499155	1124.64	22.8745	1128.68	30.2548	1137.36	76.5717	1124.64	22.8745	1.11826	6.95431		1124.64	25.1431
17-16	238	1201.34	37329.3	0.17131	12.4576	1.62419	2.11328	2.40936	0.191866	1.66475	0.690952	1131.48	17.2758	1153.15	16.6066	1194.96	34.3258	1131.48	17.2758	5.31245	3.0803		1131.48	20.2438
17-16	180	1188.3	64219.8	0.308901	12.7781	2.18712	2.10779	3.20879	0.192044	2.33538	0.727807	1132.44	24.2541	1151.35	22.0986	1188.03	43.4543	1132.44	24.2541	4.67912	4.04028		1132.44	26.4237
17-16	460	914.002	13149.6	0.224631	12.7623	1.60384	2.08154	2.5477	0.192069	1.60652	0.630578	1132.57	16.6863	1142.74	17.4745	1162.94	39.217	1132.57	16.6863	2.6115	3.58392		1132.57	19.7505
17-16	577	362.834	7734.9	0.85237	11.578	2.76077	2.26685	4.38432	0.192249	1.63965	0.37398	1133.55	17.0438	1202.04	30.893	1328.13	78.7191	1133.55	17.0438	14.6511	5.2189		1133.55	20.0565
17-16	87	882.581	43757.2	0.208182	12.547	1.53439	2.10249	2.12661	0.192421	1.43202	0.673382	1134.48	14.8967	1149.62	14.6335	1179.17	31.1049	1134.48	14.8967	3.79014	2.83493		1134.48	18.28
17-16	50	245.303	14709.3	0.420875	11.3947	4.8557	2.27765	5.18441	0.193191	1.4389	0.277544	1138.64	15.0185	1205.39	36.5848	1327.87	96.4314	1138.64	15.0185	14.2506	6.32911		1138.64	18.3995
17-16	383	891.832	18978.7	0.149074	12.8559	1.78255	2.12897	3.97621	0.193934	3.49791	0.879708	1142.65	36.6269	1158.25	27.4722	1188.43	37.3745	1142.65	36.6269	3.85246	4.31754		1142.65	38.0479
17-16	262	1183.7	36130.7	0.611987	12.4485	1.25722	2.1483	1.95864	0.194494	1.4699	0.750471	1145.67	15.4287	1164.51	13.5709	1200.58	25.4766	1145.67	15.4287	4.57309	2.39835		1145.67	18.7687
17-16	88	1809.04	122660	0.16594	12.7785	1.38755	2.0955	2.09802	0.194961	1.57139	0.748984	1148.19	16.527	1147.33	14.4213	1146.58	27.6008	1148.19	16.527	-0.140421	2.80869		1148.19	19.6892
17-16	104	483.634	24171.7	0.124283	13.0446	3.01233	2.03134	3.63867	0.195444	1.88314	0.517536	1150.8	19.847	1126.07	24.7596	1079.54	62.441	1150.8	19.847	-6.60135	6.43414		1150.8	22.5458
17-16	391	549.697	8841.57	0.277588	12.5357	2.54386	2.20235	3.74376	0.195477	1.50247	0.401326	1150.98	15.8372	1181.79	26.1444	1239.47	67.2561	1150.98	15.8372	7.13954	5.19827		1150.98	19.1299
17-16	105	593.248	39594	0.194143	12.7493	2.42566	2.09812	2.90827	0.196685	1.55287	0.53395	1157.49	16.453	1148.19	19.9991	1131.53	48.932	1157.49	16.453	-2.29419	4.65648		1157.49	19.6709
17-16	137	403.709	21579.3	0.331984	12.3255	3.00681	2.19472	3.65875	0.196841	1.50857	0.412318	1158.33	15.9942	1179.37	25.523	1219.04	65.5361	1158.33	15.9942	4.98038	5.27409		1158.33	19.2946
17-16	133	549.552	30237.3	0.0271875	12.6433	2.43499	2.1596	2.93893	0.197038	1.31886	0.448756	1159.39	13.9946	1168.14	20.3974	1185.28	51.8867	1159.39	13.9946	2.18444	4.44176		1159.39	17.6852
17-16	313	512.697	8819.78	0.342433	12.107	2.69077	2.25915	4.41401	0.198618	2.7873	0.631467	1167.89	29.7742	1199.64	31.0697	1258.15	66.9162	1167.89	29.7742	7.17417	5.47492		1167.89	31.6375
17-16	53	559.394	28893.4	0.111806	12.0348	2.47509	2.23622	3.0779	0.199846	1.79469	0.583089	1174.49	19.2699	1192.47	21.5962	1226.05	49.1211	1174.49	19.2699	4.20475	4.14735		1174.49	22.1412
17-16	476	422.018	6658.09	0.141451	12.2179	2.48546	2.2366	5.5825	0.199852	2.58224	0.46256	1174.53	27.7266	1192.59	39.1752	1226.32	97.1776	1174.53	27.7266	4.22324	7.9193		1174.53	29.7534
17-16	6	486.625	19899.9	0.356083	12.565	2.16201	2.17026	2.74391	0.199974	1.38293	0.503999	1175.18	14.8566	1171.56	19.0735	1165.73	46.9608	1175.18	14.8566	-0.810227	4.25635		1175.18	18.4516
17-16	73	1116.01	68282.4	0.0419308	12.0772	1.60334	2.27751	2.28751	0.20032	1.61205	0.704719	1177.04	17.343	1205.34	16.1405	1257.29	31.7694	1177.04	17.343	6.3829	2.73833		1177.04	20.5063
17-16	438	503.432	8108.8	0.511217	12.7372	2.75357	2.15791	4.62369	0.200343	1.4804	0.320176	1177.16	15.9281	1167.6	32.084	1150.77	86.9837	1177.16	15.9281	-2.29308	7.85496		1177.16	19.3307
17-16	178	580.149	35231.2	0.31448	12.5807	2.67692	2.21387	3.56464	0.200405	2.33598	0.655319	1177.49	25.1401	1185.44	24.934	1200.83	53.0372	1177.49	25.1401	1.94292	4.81039		1177.49	27.3859
17-16	303	993.947	19645.2	0.232606	11.9429	1.46335	2.38143	2.3348	0.20055	1.34036	0.574079	1178.27	14.4338	1237.04	16.6965	1341.75	36.9352	1178.27	14.4338	12.1837	2.64593		1178.27	18.1303
17-16	171	362.962	16472.5	0.14975	11.4126	3.40911	2.40301	6.6031	0.201001	5.47476	0.829119	1180.69	59.0664	1243.5	47.3532	1354.83	71.1976	1180.69	59.0664	12.8527	6.32302		1180.69	59.8095
17-16	435	783.344	11319	0.143291	11.536	2.35029	2.40836	7.41181	0.201162	6.87418	0.927463	1181.56	74.2145	1245.09	53.1899	1357.56	53.4277	1181.56	74.2145	12.9646	6.45122		1181.56	74.5973
17-16	488	341.223	5935.32	0.386729	12.3376	3.79525	2.21334	4.83396	0.201333	1.73135	0.358163	1182.47	18.7048	1185.27	33.8115	1191.21	89.1051	1182.47	18.7048	0.733002	7.58962		1182.47	21.6881
17-16	283	767.498	41577.2	0.152882	11.7918	1.69551	2.36034	2.58817	0.201947	1.88266	0.72741	1185.77	20.3912	1230.69	18.4598	1311.08	34.4599	1185.77	20.3912	9.55746	2.84075		1185.77	23.1642
17-16	221	196.692	10066.4	0.481303	12.0034	4.97305	2.33537	5.95659	0.203878	2.23098	0.374539	1196.12	24.3558	1223.11	42.3548	1271.89	107.78	1196.12	24.3558	5.95738	8.196		1196.12	26.7376
17-16	33	336.131	19308.1	0.614954	12.3277	3.54627	2.31686	3.8319	0.209201	1.29146	0.33703	1224.56	14.4034	1217.46	27.1795	1205.74	71.0684	1205.74	71.0684	-1.56082	6.10419		1205.74	54.1382
17-16	125	283.912	18173.6	0.280065	12.451	4.00503	2.41124	4.35885	0.216442	1.25331	0.287533	1263.05	14.3757	1245.95	31.287	1217.36	82.0998	1217.36	82.0998	-3.75276	7.09611		1217.36	93.9253
17-16	314	391.033	6751.67	0.366236	12.2687	2.82409	2.35955	4.85107	0.211575	1.59094	0.327956	1237.2	17.9096	1230.45	34.5985	1219.48	90.0859	1219.48	90.0859	-1.45347	7.63717		1219.48	45.4517
17-16	337	339.318	5042.54	0.442757	12.2776	2.71776	2.2985	4.37102	0.205917	1.45376	0.332591	1207.03	16.0024	1211.83	30.9296	1221.23	80.9863	1221.23	80.9863	1.16307	6.6841		1221.23	46.7841
17-16	580	272.336	6243.58	0.207232	12.1508	3.8282	2.34707	5.66591	0.209502	1.76938	0.312285	1226.16	19.757	1226.67	40.3476	1228.39	105.659	1228.39	105.659	0.181158	8.73517		1228.39	53.251
17-16	46	249.423	11422.2	0.604825	11.9426	4.51382	2.30315	5.37618	0.205075	1.52313	0.283311	1202.53	16.7092	1213.26	38.067	1233.27	101.135	1233.27	101.135	2.49276	8.1101		1233.27	36.4434
17-16	24	219.169	12476.1	0.431014	11.9895	5.57851	2.45896	5.79652	0.21621	1.50811	0.260175	1261.82	17.283	1260.06	41.847	1257.93	109.442	1257.93	109.442	-0.309128	8.83454		1257.93	88.288
17-16	185	422.643	33903.4	0.765769	12.3866	2.83249	2.33636	4.91375	0.205144	3.95881	0.80566	1202.9	43.4415	1223.42	34.9424	1260.61	56.8491	1260.61	56.8491	4.57824	5.51297		1260.61	105.697
17-16	372	972.032	16152.2	0.555834	12.1655	2.25612	2.38854	3.34057	0.209196	2.15357	0.64467	1224.53	24.0178	1239.17	23.9106	1265.55	49.8619	1265.55	49.8619	3.24141	4.25849		1265.55	65.0335
17-16	415	743.731	13070.4	0.345727	12.0402	1.93534	2.36395	2.68939	0.205677	1.55025	0.576431	1205.75	17.048	1231.78	19.1904	1278.46	42.8045	1278.46	42.8045	5.68775	3.42771		1278.46	52.2438
17-16	122	130.578	7582.67	0.29554	11.7485	5.82829	2.80772	6.67122	0.24297	1.57744	0.236454	1402.12	19.8775	1357.6	49.9587	1288.99	126.2	1288.99	126.2	-8.77638	10.7609		1288.99	83.8131
17-16	566	348.816	6974.67	0.669878	11.7239	3.1117	2.62266	5.70971	0.226604	2.20008	0.385323	1316.68	26.2012	1307.01	41.9779	1292.01	102.528	1292.01	102.528	-1.90878	8.33741		1292.01	33.7228
17-16	543	236.985	4792.66	0.799019	11.6872	4.05145	2.66488	5.29471	0.229841	1.44281	0.272499	1333.67	17.3822	1318.77	39.097	1295.48	99.0464	1295.48	99.0464	-2.94742	7.98441		1295.48	47.8204
17-16	393	305.335	4484.97	0.257095	11.8662	3.36196	2.49033	5.61606	0.212976	3.57505	0.636576	1244.65	40.465	1269.23	40.6921	1311.93	84.0333	1311.93	84.0333	5.12822	6.8148		1311.93	81.7082
17-16	170	349.929	22605.4	0.30885	11.6571	2.89477	2.71498	3.47025	0.231384	1.67437	0.482493	1341.75	20.282	1332.56	25.7528	1318.66	58.9207	1318.66	58.9207	-1.75103	4.79959		1318.66	45.4152
17-16	539	347.137	6357.92	0.334346	11.6497	2.70585	2.63652	3.57334	0.224677	1.45932	0.408391	1306.54	17.2587	1310.89	26.3072	1318.83	63.2264	1318.83	63.2264	0.931764	4.92645		1318.83	41.0724
17-16	496	510.842	11150.7	0.256701	11.7027	2.1991	2.61426	3.73341	0.222639	1.65376	0.442962	1295.8	19.413	1304.65	27.4215	1320.06	64.8679	1320.06	64.8679	1.83751	5.04291		1320.06	42.5525
17-16	288	138.452	9168.65	0.333207	11.5783	6.06086	2.70659	6.86312	0.229747	1.86825	0.272216	1333.17	22.5003	1330.27	50.8968	1326.41	127.878	1326.41	127.878	-0.509525	9.83739		1326.41	96.7629
17-16	377	281.633	5845.8	0.183221	11.654	3.23498	2.45849	6.84974	0.20758	5.30593	0.774619	1215.91	58.7968	1259.92	49.4506	1336.7	83.7647	1336.7	83.7647	9.03607	7.2001		1336.7	68.8999
17-16	301	387.62	6654.09	0.403603	11.7894	2.70325	2.52959	3.78324	0.213501	1.93964	0.512692	1247.44	21.9988	1280.58	27.5326	1337.46	62.798	1337.46	62.798	6.73033	4.67802		1337.46	82.9217
17-16	477	492.781	9364.4	0.225306	11.5937	1.81281	2.61558	3.96697	0.219849	3.09391	0.779918	1281.07	35.9455	1305.02	29.1413	1345.43	47.9471	1345.43	47.9471	4.78355	4.31877		1345.43	43.4396
17-16	398	306.059	6259.18	0.376859	11.5748	3.18452	2.70225	4.98572	0.226683	1.47991	0.296829	1317.09	17.6295	1329.08	36.9544	1349.27	91.9011	1349.27	91.9011	2.38472	6.77593		1349.27	67.2761
17-16	408	552.253	10132.9	0.364859	11.5107	2.2689	2.87781	3.47169	0.240959	1.324	0.381371	1391.68	16.5727	1376.12	26.162	1352.88	61.9123	1352.88	61.9123	-2.86779	4.86434		1352.88	44.347
17-16	355	247.305	6575.49	0.404118	11.4912	3.48747	2.88737	4.3623	0.240716	1.57464	0.360965	1390.42	19.6939	1378.62	32.9026	1361.21	78.393	1361.21	78.393	-2.1454	6.05791		1361.21	70.4636
17-16	586	220.548	5398.11	0.382808	11.3556	3.0614	2.83124	4.97984	0.234736	1.60686	0.322673	1359.27	19.6926	1363.85	37.3708	1371.85	90.6977	1371.85	90.6977	0.916865	6.70615		1371.85	50.5652
17-16	253	1608.93	108635	0.215224	11.4331	4.05269	2.72898	7.21115	0.225661	5.95816	0.826242	1311.72	70.7165	1336.38	53.5976	1376.93	78.1067	1376.93	78.1067	4.73622	7.45507		1376.93	86.3807
17-16	523	425.526	11205.7	0.549356	11.4218	1.90228	2.8776	3.22992	0.237766	1.9418	0.601192	1375.07	24.0456	1376.06	24.3394	1378.42	49.6145	1378.42	49.6145	0.242665	3.99196		1378.42	48.8827
17-16	323	1236.07	22635.8	0.100507	11.5504	1.38149	2.74282	2.26429	0.226585	1.25105	0.552516	1316.58	14.898	1340.14	16.8488	1378.8	36.277	1378.8	36.277	4.51279	2.73482		1378.8	63.0409
17-16	571	323.464	5724.73	1.11127	11.1576	2.80039	2.96281	6.02265	0.243697	1.329	0.220667	1405.89	16.7872	1398.14	45.7289	1387.15	112.8	1387.15	112.8	-1.35121	8.33009		1387.15	27.3532
17-16	451	360.226	7251.99	0.47497	11.3344	2.31541	2.93797	4.45797	0.24137	1.61082	0.361335	1393.81	20.1905	1391.75	33.774	1389.41	79.7879	1389.41	79.7879	-0.316953	5.94123		1389.41	51.7619
17-16	121	424.45	27050.6	0.193042	11.2705	2.31608	2.80889	3.99911	0.229445	3.17047	0.792794	1331.59	38.1428	1357.91	29.9476	1400.41	46.7107	1400.41	46.7107	4.91438	4.1806		1400.41	51.8529
17-16	62	245.828	15072	0.43435	10.9324	2.78634	3.14427	3.40737	0.256403	1.53241	0.449732	1471.41	20.1598	1443.6	26.251	1403.68	58.2978	1403.68	58.2978	-4.82575	4.58443		1403.68	4.45342
17-16	430	543.497	10086.9	0.731469	11.1423	1.52155	2.9555	2.79448	0.238254	1.23117	0.440574	1377.61	15.2711	1396.26	21.202	1425.67	47.9112	1425.67	47.9112	3.37048	3.41945		1425.67	42.5138
17-16	216	366.254	24800.3	0.477901	11.2395	2.20085	2.99043	3.01623	0.241046	1.77808	0.589502	1392.13	22.2629	1405.19	22.9524	1425.86	46.5303	1425.86	46.5303	2.36514	3.54815		1425.86	70.0839
17-16	353	274.942	6004.16	0.366272	11.0788	2.87522	3.09531	3.93293	0.249114	1.43608	0.365141	1433.91	18.4626	1431.53	30.1853	1428.81	69.8996	1428.81	69.8996	-0.356546	5.07679		1428.81	56.6614
17-16	330	679.272	18034.2	0.328149	11.1747	1.64895	2.9445	2.6438	0.236542	1.41821	0.536429	1368.69	17.4887	1393.43	20.0397	1432.32	42.5741	1432.32	42.5741	4.44211	3.09168		1432.32	56.6535
17-16	555	207.128	4824.86	0.290909	10.9221	3.51297	3.04045	4.33275	0.24364	1.50025	0.346259	1405.59	18.9468	1417.84	33.1085	1437.09	77.5146	1437.09	77.5146	2.19177	5.43789		1437.09	48.6297
17-16	83	454.972	27505.6	0.261238	10.9609	1.93934	2.83444	2.86278	0.226538	2.07273	0.724026	1316.33	24.6786	1364.7	21.4881	1442.08	37.6288	1442.08	37.6288	8.72019	2.93285		1442.08	33.8449
17-16	334	322.437	6605.74	0.617723	11.0691	2.31027	2.92062	3.74582	0.233236	2.48495	0.663394	1351.44	30.2961	1387.27	28.3351	1443.63	53.4012	1443.63	53.4012	6.38586	4.04917		1443.63	60.2467
17-16	126	653.71	41255.3	0.49212	11.1329	2.51241	2.78474	4.32043	0.22218	3.50845	0.81206	1293.38	41.1154	1351.45	32.2806	1445.38	48.0244	1445.38	48.0244	10.516	4.11482		1445.38	76.4273
17-16	506	609.854	11649.2	0.535304	10.9677	1.82324	2.97883	3.25451	0.237611	2.33573	0.717689	1374.27	28.9084	1402.23	24.7416	1445.82	43.1651	1445.82	43.1651	4.94872	3.47142		1445.82	36.9512
17-16	551	200.631	5262.35	0.633915	10.9089	4.8213	3.10638	5.66346	0.247278	1.6151	0.285179	1424.42	20.6415	1434.27	43.5085	1449.72	103.35	1449.72	103.35	1.74492	7.14779		1449.72	82.0348
17-16	93	395.407	27213.7	0.295788	10.8949	2.22489	3.16496	2.80025	0.251931	1.55278	0.554515	1448.43	20.1433	1448.65	21.6073	1449.8	44.3598	1449.8	44.3598	0.0943757	3.35777		1449.8	34.6085
17-16	312	216.107	4614.17	0.616699	10.8062	4.27689	3.18282	5.71318	0.253187	1.64199	0.287403	1454.89	21.3853	1453	44.1488	1451.04	104.166	1451.04	104.166	-0.265762	7.34717		1451.04	55.5437
17-16	436	592.965	12012.4	0.436626	11.0013	1.88696	3.158	3.04226	0.251159	1.48514	0.488171	1444.45	19.2187	1446.95	23.4624	1451.45	50.5325	1451.45	50.5325	0.481874	3.70915		1451.45	49.432
17-16	215	143.22	9021.19	0.61451	10.9602	5.6751	2.86573	7.11129	0.227685	3.40991	0.479507	1322.36	40.7671	1372.95	53.5405	1453.37	118.761	1453.37	118.761	9.01433	7.94636		1453.37	109.949
17-16	249	741.412	42848.8	0.363336	10.8674	1.64099	3.0456	2.76082	0.240443	2.21315	0.801628	1389	27.6545	1419.13	21.1044	1465.44	31.3521	1465.44	31.3521	5.21646	2.77006		1465.44	36.2274
17-16	568	268.58	5226.24	0.246814	10.6607	3.13379	2.99688	3.83716	0.236366	1.51167	0.393956	1367.78	18.63	1406.83	29.2158	1467.3	66.9823	1467.3	66.9823	6.78281	4.44075		1467.3	25.9401
17-16	320	285.64	6980.54	0.373299	10.8241	3.79556	3.24574	5.60153	0.255351	2.67307	0.477203	1466.01	35.0511	1468.16	43.4874	1472.07	93.4341	1472.07	93.4341	0.411501	6.75459		1472.07	71.2693
17-16	549	1009.61	22513.3	0.474125	10.9783	1.50838	3.06529	2.3998	0.241006	1.66455	0.693622	1391.92	20.8386	1424.06	18.3737	1473.25	32.803	1473.25	32.803	5.5201	2.53498		1473.25	61.4688
17-16	81	747.019	61504.6	0.377554	10.8309	1.40857	3.23136	1.94773	0.254026	1.327	0.681307	1459.2	17.3285	1464.71	15.1033	1473.52	27.0534	1473.52	27.0534	0.971674	2.16531		1473.52	34.4931
17-16	296	323.396	26294.4	0.396551	10.8149	2.5934	3.28679	3.05666	0.258021	1.4512	0.474766	1479.71	19.1872	1477.93	23.7978	1476.18	51.0303	1476.18	51.0303	-0.23902	3.70093		1476.18	53.0221
17-16	297	245.46	21010.7	0.366991	10.7582	3.09371	3.31214	3.68831	0.259012	1.53534	0.416272	1484.79	20.3617	1483.91	28.7675	1483.48	63.5528	1483.48	63.5528	-0.0884229	4.50216		1483.48	58.7971
17-16	542	323.892	5643.12	0.539042	10.6773	2.79648	3.24708	3.7963	0.253761	1.32519	0.349073	1457.84	17.2904	1468.48	29.4729	1484.7	67.404	1484.7	67.404	1.80858	4.60742		1484.7	40.5433
17-16	124	314.454	18356.1	0.227248	10.8231	2.42945	3.00801	4.65079	0.234359	3.91548	0.841896	1357.31	47.9232	1409.65	35.4447	1490.49	47.5159	1490.49	47.5159	8.93583	4.33193		1490.49	66.0461
17-16	151	198.691	15924.4	0.416464	10.6082	2.96148	3.29627	3.39304	0.256425	1.51522	0.446568	1471.52	19.9351	1480.17	26.4347	1493.4	57.4532	1493.4	57.4532	1.46462	4.01897		1493.4	39.6807
17-16	517	2359.97	49049.8	0.293596	10.8862	2.68303	2.96315	7.73953	0.230489	7.23646	0.935	1337.06	87.3824	1398.22	58.7731	1493.57	51.9418	1493.57	51.9418	10.479	6.62733		1493.57	84.4883
17-16	213	325.204	18007.4	0.370983	10.7729	3.18008	3.27962	3.78822	0.253888	1.5248	0.40251	1458.5	19.9028	1476.23	29.4791	1502.62	65.5472	1502.62	65.5472	2.93633	4.43645		1502.62	82.0332
17-16	362	661.694	14730.6	0.502605	10.7993	1.55654	3.26019	2.56432	0.252313	1.38299	0.539319	1450.39	17.9624	1471.61	19.9265	1503.15	40.8106	1503.15	40.8106	3.50973	2.87939		1503.15	60.6947
17-16	264	246.976	19357.2	0.524028	10.5563	3.02693	3.40617	3.44137	0.262444	1.43574	0.4172	1502.33	19.2406	1505.82	27.0142	1511.53	59.045	1511.53	59.045	0.6084	4.08588		1511.53	49.6037
17-16	348	781.591	18154.3	0.530312	10.8038	1.43595	3.21564	2.12895	0.24742	1.46808	0.68958	1425.16	18.7711	1460.94	16.4895	1514.15	29.0945	1514.15	29.0945	5.87754	2.19267		1514.15	70.7495
17-16	311	744.991	12475.2	1.20465	10.7659	1.76546	2.99276	4.59602	0.230104	4.04075	0.879185	1335.04	48.7263	1405.78	34.9827	1515.53	41.319	1515.53	41.319	11.9091	4.01314		1515.53	70.305
17-16	232	437.898	30283.3	0.407665	10.5798	1.91143	3.42591	2.61954	0.262985	1.54754	0.59077	1505.09	20.7728	1510.36	20.5894	1518.55	39.862	1518.55	39.862	0.886055	2.93944		1518.55	42.4455
17-16	58	223.232	15795	0.621111	10.2958	2.98421	3.59493	4.02916	0.275719	2.50359	0.621367	1569.77	34.8814	1548.41	32.0105	1520.19	59.531	1520.19	59.531	-3.26128	4.64938		1520.19	10.202
17-16	247	231.614	15247.2	0.420575	10.3909	2.9164	3.12212	3.47252	0.237673	1.4984	0.431504	1374.59	18.549	1438.16	26.7072	1534.28	58.9621	1534.28	58.9621	10.4081	3.6491		1534.28	40.5235
17-16	12	872.783	55520.9	0.907435	10.4044	1.5789	3.35299	3.17798	0.25284	2.7202	0.855953	1453.1	35.3892	1493.49	24.8569	1552.09	30.8559	1552.09	30.8559	6.37782	2.94329		1552.09	39.3247
17-16	54	243.148	21553.4	1.01734	9.95401	2.71416	3.83391	3.18431	0.283529	1.53256	0.481285	1609.11	21.8237	1599.89	25.6455	1588.57	52.1632	1588.57	52.1632	-1.29271	3.59864		1588.57	10.608
17-16	450	626.086	14334.8	0.674463	10.3187	1.55112	3.59451	3.22513	0.26561	2.52372	0.782518	1518.48	34.1432	1548.32	25.6213	1590.09	37.5176	1590.09	37.5176	4.5035	3.1125		1590.09	61.3227
17-16	490	534.218	9951.11	0.304049	10.1883	1.96092	3.24425	3.53278	0.239388	2.2302	0.631287	1383.51	27.7687	1467.8	27.4212	1592.74	51.1746	1592.74	51.1746	13.1362	3.29074		1592.74	46.2228
17-16	508	172.081	4527.54	1.13682	10.0076	3.13196	3.83171	4.21104	0.282449	1.68656	0.400508	1603.68	23.9453	1599.43	33.9119	1594.63	72.0533	1594.63	72.0533	-0.567836	4.78584		1594.63	33.7184
17-16	466	307.616	7643.01	0.731112	10.1017	1.9935	3.8545	2.60605	0.284104	1.48154	0.5685	1612	21.1304	1604.21	21.0112	1594.79	40.0357	1594.79	40.0357	-1.07914	2.86259		1594.79	32.7567
17-16	63	230.393	20368.9	0.469879	9.93395	2.99903	4.06785	4.27998	0.298353	3.02996	0.707938	1683.14	44.8843	1647.88	34.8863	1604.01	56.3786	1604.01	56.3786	-4.93329	4.62964		1604.01	27.0194
17-16	370	1159.08	30598.7	0.694251	10.2287	1.56856	3.68526	3.72925	0.269746	3.34104	0.895903	1539.51	45.7552	1568.18	29.7863	1607.78	30.8814	1607.78	30.8814	4.24612	3.38844		1607.78	62.7823
17-16	332	292.326	7443.11	0.780463	10.0658	2.70164	3.39026	3.29184	0.247829	1.14499	0.347827	1427.27	14.6595	1502.15	25.8128	1610.21	57.5161	1610.21	57.5161	11.3612	3.29444		1610.21	52.9636
17-16	322	610.009	2855.41	0.172494	9.7705	1.80964	3.83909	7.4322	0.279951	1.66754	0.224367	1591.11	23.5117	1600.98	59.8877	1614.79	134.93	1614.79	134.93	1.46604	8.36112		1614.79	-12.311
17-16	10	110.194	10842.7	1.05298	9.90931	5.0619	3.85032	5.80138	0.28073	1.64085	0.282837	1595.04	23.1856	1603.33	46.7696	1615.05	103.645	1615.05	103.645	1.23874	6.49851		1615.05	68.8307
17-16	425	228.67	7650.24	0.778527	9.98718	3.0577	4.09629	4.89982	0.298449	1.63534	0.333756	1683.61	24.2311	1653.56	39.9947	1616.39	86.013	1616.39	86.013	-4.15911	5.74178		1616.39	50.3939
17-16	290	146.239	13299.4	0.792942	10.003	4.39304	3.927	4.85401	0.286094	1.73302	0.357028	1621.98	24.8518	1619.26	39.2883	1616.53	84.4357	1616.53	84.4357	-0.337285	5.46173		1616.53	76.3946
17-16	279	675.815	57021	0.287049	9.96665	1.53028	3.92568	1.99007	0.285072	1.24721	0.626716	1616.86	17.8355	1618.99	16.1048	1622.55	28.8509	1622.55	28.8509	0.351077	2.08514		1622.55	28.3803
17-16	206	196.271	11767.2	1.00259	9.97873	2.82279	3.88467	3.67609	0.281923	2.21076	0.601389	1601.04	31.3422	1610.5	29.687	1623.69	54.6388	1623.69	54.6388	1.39466	3.8388		1623.69	52.1695
17-16	414	189.63	4454.79	0.433652	9.86034	4.99343	3.43442	10.2778	0.249145	6.68077	0.650021	1434.06	85.8994	1512.31	80.8677	1624.45	145.33	1624.45	145.33	11.7199	9.50467		1624.45	67.7414
17-16	573	264.275	4524.29	0.486465	9.86161	2.64404	3.69341	5.14297	0.267586	1.40215	0.272635	1528.54	19.0809	1569.94	41.1	1626.86	92.0225	1626.86	92.0225	6.04381	5.44246		1626.86	30.3047
17-16	74	199.517	16203.1	0.469258	9.8853	2.88974	3.98717	3.59241	0.288751	1.92341	0.53541	1635.29	27.7809	1631.59	29.1646	1627.61	56.4166	1627.61	56.4166	-0.471574	3.87835		1627.61	39.6124
17-16	172	316.16	21398.1	0.42496	9.87432	2.5578	3.83476	3.327	0.276587	1.99088	0.598401	1574.15	27.8064	1600.07	26.7961	1635.17	49.5147	1635.17	49.5147	3.73132	3.37487		1635.17	39.5977
17-16	471	254.357	6500.16	0.479723	9.93321	2.99416	4.02233	4.81496	0.289426	1.49004	0.30946	1638.66	21.5604	1638.72	39.1606	1639.59	85.0084	1639.59	85.0084	0.0569956	5.34602		1639.59	62.3838
17-16	426	336.209	7458.26	0.058962	9.84455	2.18464	3.88285	3.32735	0.278913	1.42098	0.42706	1585.89	19.9771	1610.12	26.8677	1642.76	55.831	1642.76	55.831	3.46193	3.49907		1642.76	35.5322
17-16	85	543.88	43333.7	0.318769	9.84467	1.51096	4.02683	2.03803	0.288893	1.29974	0.637744	1635.99	18.78	1639.63	16.5775	1645.09	29.1236	1645.09	29.1236	0.552758	2.09827		1645.09	27.6784
17-16	352	889.721	23375.3	0.0874786	10.0196	1.54507	3.79522	2.64338	0.270489	2.01394	0.761882	1543.28	27.6404	1591.73	21.2439	1657.3	31.7121	1657.3	31.7121	6.87953	2.4406		1657.3	73.235
17-16	97	388.155	37137	0.475977	9.74315	1.95795	4.26868	2.54137	0.303927	1.50764	0.593238	1710.75	22.6533	1687.34	20.9076	1659.16	37.885	1659.16	37.885	-3.10933	2.72163		1659.16	29.1154
17-16	164	329.933	23747.6	0.807539	9.76336	1.96346	3.83492	2.55514	0.272496	1.31749	0.515622	1553.46	18.1873	1600.11	20.5791	1662.88	40.5219	1662.88	40.5219	6.58018	2.52561		1662.88	36.7694
17-16	360	489.682	14413.2	0.26526	9.89379	1.55808	4.09778	2.11073	0.290415	1.25239	0.593346	1643.61	18.1698	1653.86	17.2282	1667.7	31.4271	1667.7	31.4271	1.44497	2.15321		1667.7	60.2399
17-16	17	144.171	11225.8	1.77075	9.67362	4.98252	4.00107	5.41299	0.282815	1.32409	0.244614	1605.53	18.8181	1634.41	43.9793	1672.57	97.0416	1672.57	97.0416	4.00867	5.68186		1672.57	79.8861
17-16	308	382.39	6751.84	0.799099	9.83436	1.90663	3.77255	2.77817	0.265768	1.5969	0.574803	1519.28	21.6145	1586.92	22.2993	1678.78	41.993	1678.78	41.993	9.50076	2.60427		1678.78	65.2841
17-16	497	481.02	830.012	0.280244	8.44506	1.47	3.62047	4.21678	0.254807	1.48548	0.352279	1463.22	19.4455	1554.04	33.5528	1680.58	72.8855	1680.58	72.8855	12.9335	3.94932		1680.58	-217.866
17-16	416	440.197	10529.7	0.877376	9.70929	1.86198	4.13026	2.58	0.289691	1.634	0.633334	1639.98	23.6603	1660.31	21.0913	1686.9	36.8422	1686.9	36.8422	2.78141	2.5447		1686.9	48.9207
17-16	443	109.065	2889.04	1.28561	9.34091	6.39492	4.41069	8.52312	0.30701	2.34996	0.275715	1725.98	35.5838	1714.35	70.576	1700.96	150.972	1700.96	150.972	-1.47064	9.24599		1700.96	67.3825
17-16	474	583.587	11884.2	0.517081	9.66094	1.60376	4.03984	3.12309	0.281175	1.91497	0.613167	1597.28	27.0926	1642.26	25.4205	1701.11	45.4435	1701.11	45.4435	6.10355	2.97126		1701.11	50.0283
17-16	198	238.131	16793.1	0.579678	9.7095	2.47065	4.31504	3.05608	0.299772	1.55054	0.507364	1690.18	23.0529	1696.24	25.1939	1704.52	48.4885	1704.52	48.4885	0.841441	3.12824		1704.52	76.172
17-16	2	576.096	56639.3	0.640864	9.47777	1.63415	4.76751	2.60907	0.330118	2.03022	0.778138	1838.96	32.4819	1779.2	21.8996	1710.57	30.1475	1710.57	30.1475	-7.5054	2.68248		1710.57	24.5302
17-16	154	82.3234	6114.61	0.738349	9.17483	7.37064	4.01567	9.25812	0.276017	5.08124	0.548842	1571.27	70.8553	1637.37	75.2976	1724.12	142.187	1724.12	142.187	8.86509	8.56603		1724.12	73.9076
17-16	223	299.76	32740.6	1.11402	9.45831	2.00621	4.66997	2.52327	0.318521	1.5033	0.595777	1782.5	23.4108	1761.88	21.1029	1738.29	37.1538	1738.29	37.1538	-2.54337	2.57245		1738.29	54.0316
17-16	511	281.201	9202.99	0.207922	9.38357	2.03433	4.44383	3.37621	0.301984	1.31935	0.390779	1701.14	19.7269	1720.55	27.986	1745.03	56.9317	1745.03	56.9317	2.51489	3.37539		1745.03	46.5696
17-16	13	563.494	37381.6	0.423768	9.37244	1.70891	4.48853	2.38868	0.304804	1.6535	0.692224	1715.09	24.9	1728.85	19.8358	1746.33	31.5719	1746.33	31.5719	1.78916	2.27719		1746.33	40.785
17-16	316	263.982	7200.34	0.597605	9.36126	1.83568	4.47724	2.88338	0.303858	1.38931	0.481836	1710.41	20.8718	1726.76	23.9332	1747.42	46.2698	1747.42	46.2698	2.11796	2.8538		1747.42	41.5544
17-16	112	524.242	50306.5	0.0869957	9.29426	2.1836	4.3196	6.17758	0.292807	5.77138	0.934245	1655.54	84.2658	1697.11	50.9453	1749.62	40.3343	1749.62	40.3343	5.37686	5.28721		1749.62	35.8771
17-16	23	728.609	50140.2	0.203147	9.30256	1.35419	4.36023	2.08298	0.293927	1.56713	0.752348	1661.12	22.9484	1704.84	17.2049	1759.76	25.0918	1759.76	25.0918	5.60524	1.87407		1759.76	35.461
17-16	561	301.391	8187.89	0.34016	9.25962	2.64204	4.16333	7.36178	0.280348	6.16852	0.837912	1593.12	87.0715	1666.83	60.2908	1761.75	73.4561	1761.75	73.4561	9.57201	6.2163		1761.75	48.4643
17-16	531	1164.91	32144.1	0.413955	9.32396	1.30026	4.41406	2.16837	0.29561	1.61897	0.74663	1669.5	23.8123	1714.98	17.951	1771.75	26.3343	1771.75	26.3343	5.77095	1.94112		1771.75	50.9538
17-16	65	384.156	22476.7	0.362943	9.0682	1.84018	4.14762	4.96472	0.277353	4.48287	0.902945	1578.02	62.7481	1663.74	40.6233	1774.47	38.9412	1774.47	38.9412	11.0707	4.03895		1774.47	10.3342
17-16	255	338.435	37459.9	0.217197	9.20485	1.81996	4.77463	2.3992	0.318464	1.48904	0.620639	1782.22	23.1855	1780.45	20.1431	1779.15	34.3137	1779.15	34.3137	-0.173038	2.33043		1779.15	42.0923
17-16	287	150.628	15304.2	1.1584	9.14385	3.62097	4.89976	4.05487	0.32598	1.56367	0.385628	1818.87	24.781	1802.22	34.1971	1783.78	68.2069	1783.78	68.2069	-1.96696	4.13904		1783.78	63.5637
17-16	376	276.769	6391.44	0.708165	9.2468	2.4376	4.61434	4.2748	0.306515	1.49572	0.349892	1723.54	22.6207	1751.87	35.6781	1786.61	72.984	1786.61	72.984	3.53031	4.13924		1786.61	67.4806
17-16	446	79.0489	2731.27	1.27159	8.89558	7.60846	4.85715	10.0512	0.32197	2.29418	0.228249	1799.34	36.0197	1794.85	84.6827	1790.42	178.356	1790.42	178.356	-0.498639	10.2115		1790.42	87.1314
17-16	437	793.021	16799.4	0.169114	9.20019	1.58195	4.3825	2.47771	0.289926	1.68341	0.679423	1641.16	24.3911	1709.05	20.4849	1794.06	33.1	1794.06	33.1	8.52289	2.16721		1794.06	52.6121
17-16	563	622.262	10226.2	1.01984	9.0731	1.40192	4.57765	4.01097	0.302511	3.23953	0.807667	1703.75	48.5023	1745.21	33.428	1796.02	43.0469	1796.02	43.0469	5.13744	3.53022		1796.02	26.6212
17-16	222	446.451	44072.7	0.079912	9.21499	1.48256	4.42046	1.99796	0.292117	1.24515	0.623212	1652.1	18.1467	1716.18	16.5447	1796.06	28.4442	1796.06	28.4442	8.01508	1.77285		1796.06	56.1527
17-16	364	247.856	7032.24	0.288726	9.09226	2.10032	4.93986	3.89965	0.326425	1.87969	0.482017	1821.03	29.82	1809.09	32.933	1796.14	62.1942	1796.14	62.1942	-1.38577	3.88341		1796.14	40.8064
17-16	421	229.43	5535.07	0.626723	9.0196	2.28381	4.83958	4.01759	0.319175	1.68288	0.418878	1785.7	26.2482	1791.81	33.8113	1799.7	66.3789	1799.7	66.3789	0.777607	3.93958		1799.7	32.5493
17-16	530	756.45	20814.8	0.360336	9.1581	1.56724	4.17308	4.0504	0.275062	3.64678	0.900351	1566.45	50.7142	1668.75	33.1798	1800.73	32.0682	1800.73	32.0682	13.0105	3.21426		1800.73	50.6702
17-16	349	470.343	5869.56	0.207929	9.14395	1.6078	4.4089	3.24098	0.290556	1.60934	0.496559	1644.31	23.3571	1714.01	26.8258	1801.04	51.1747	1801.04	51.1747	8.70245	2.90023		1801.04	48.7313
17-16	110	717.766	74534.6	0.107137	8.98502	1.24436	4.77428	1.72908	0.314296	1.1862	0.68603	1761.81	18.2862	1780.39	14.5165	1803.01	22.8817	1803.01	22.8817	2.28492	1.60201		1803.01	13.7445
17-16	25	479.457	38816.8	0.103357	9.03575	1.44899	4.64934	2.9705	0.304887	2.53253	0.852562	1715.5	38.1453	1758.17	24.8241	1810.05	28.2089	1810.05	28.2089	5.22375	2.57349		1810.05	33.7629
17-16	369	174.945	4563.67	0.986224	8.956	3.37557	4.6396	4.0629	0.304079	1.59394	0.392316	1711.5	23.9592	1756.42	33.9421	1811.07	67.9046	1811.07	67.9046	5.49773	3.7822		1811.07	48.716
17-16	386	2851.38	62473.5	0.452837	9.41646	1.26069	4.43731	1.85693	0.290814	1.35211	0.728145	1645.59	19.6373	1719.33	15.3875	1811.11	23.1232	1811.11	23.1232	9.13881	1.58789		1811.11	107.952
17-16	564	401.676	9438.04	0.624946	8.97759	1.81868	4.51845	3.83715	0.295713	3.27096	0.852446	1670.01	48.1234	1734.37	31.9041	1813.68	36.4375	1813.68	36.4375	7.92137	3.23456		1813.68	30.9011
17-16	100	407.524	28695.7	0.326235	8.88774	1.72946	4.58698	2.44117	0.299651	1.56546	0.641274	1689.58	23.2675	1746.9	20.3513	1816.99	34.0081	1816.99	34.0081	7.01253	2.16075		1816.99	14.5859
17-16	72	265.296	23396.2	0.146942	8.93848	1.96598	4.81599	2.48777	0.314008	1.50394	0.604532	1760.4	23.1681	1787.69	20.9179	1820.47	35.9642	1820.47	35.9642	3.29967	2.29545		1820.47	31.9378
17-16	441	98.3195	2801.16	0.909189	8.7584	4.08009	5.11612	7.94523	0.333243	1.58956	0.200065	1854.08	25.6122	1838.79	67.5089	1822.29	141.295	1822.29	141.295	-1.74457	8.01321		1822.29	30.9806
17-16	45	287.94	23216.4	0.786594	8.7956	1.72205	4.94706	2.3102	0.321291	1.21693	0.526763	1796.03	19.0758	1810.32	19.5136	1827.59	35.6064	1827.59	35.6064	1.7271	2.18065		1827.59	6.14571
17-16	481	685.459	15964.9	0.274311	9.02803	1.71321	4.73924	2.67768	0.307439	2.04212	0.762645	1728.09	30.9554	1774.21	22.4523	1829.68	31.396	1829.68	31.396	5.55248	2.34283		1829.68	55.5743
17-16	123	315.715	27971.8	0.312961	8.97089	1.69029	4.8729	2.1067	0.315263	1.21851	0.578397	1766.55	18.8281	1797.58	17.7492	1834.54	31.138	1834.54	31.138	3.70586	1.92993		1834.54	48.5187
17-16	167	271.478	23451.2	0.383112	8.89297	1.90203	5.11255	2.89679	0.330721	2.15809	0.744993	1841.87	34.5751	1838.19	24.6027	1834.8	35.0112	1834.8	35.0112	-0.38577	2.68706		1834.8	36.0078
17-16	162	823.705	62209	0.262163	8.90187	1.45571	4.97871	2.01276	0.321712	1.37636	0.683815	1798.08	21.5963	1815.71	17.0193	1836.77	26.6022	1836.77	26.6022	2.10641	1.8419		1836.77	33.3862
17-16	325	73.8247	1663.86	0.676285	8.43918	8.49436	4.98618	10.1728	0.321989	1.6835	0.165491	1799.44	26.433	1816.98	86.0891	1837.93	181.798	1837.93	181.798	2.09436	9.79049		1837.93	52.9902
17-16	532	215.338	6479.3	0.927308	8.85105	1.98388	4.98125	4.49862	0.321363	1.50229	0.333945	1796.38	23.553	1816.14	38.0458	1839.66	76.7822	1839.66	76.7822	2.35282	4.27187		1839.66	33.5148
17-16	378	288.322	7854.51	0.37505	9.08403	1.70074	4.70626	3.66873	0.303232	2.46907	0.673003	1707.31	37.0344	1768.35	30.7258	1841.99	49.1191	1841.99	49.1191	7.31163	3.18613		1841.99	78.9968
17-16	336	169.179	5214.03	0.314802	8.91663	3.24651	4.85593	4.6634	0.312314	1.7504	0.375348	1752.09	26.854	1794.64	39.2702	1845.24	78.2158	1845.24	78.2158	5.0484	4.27983		1845.24	72.7042
17-16	405	98.6106	3454.42	1.18422	8.62419	4.15368	5.42355	7.69298	0.348486	2.1235	0.276031	1927.37	35.3762	1888.58	65.9759	1846.98	133.803	1846.98	133.803	-4.35241	7.7986		1846.98	28.8214
17-16	286	247.376	21612	0.731697	8.85057	2.19339	4.93052	2.62509	0.316685	1.37362	0.523264	1773.52	21.2975	1807.5	22.1611	1847.68	40.4642	1847.68	40.4642	4.01359	2.39739		1847.68	44.639
17-16	271	586.564	44469.5	0.502068	8.81234	1.29527	4.97757	1.86947	0.319118	1.30814	0.69974	1785.42	20.4006	1815.52	15.807	1851.01	24.1461	1851.01	24.1461	3.54342	1.6727		1851.01	27.1234
17-16	518	192.065	4769.07	0.696815	8.76145	2.40269	5.1722	4.95329	0.331371	1.72946	0.349154	1845.02	27.7488	1848.05	42.1523	1852.24	83.9175	1852.24	83.9175	0.389756	4.7551		1852.24	34.086
17-16	99	493.898	44805.4	0.58007	8.75211	1.45692	5.01592	2.09309	0.320514	1.4712	0.702882	1792.24	23.0194	1822.01	17.7206	1856.99	26.8986	1856.99	26.8986	3.48701	1.86842		1856.99	22.8244
17-16	109	170.947	17138.9	0.482821	8.6188	2.51706	5.26487	3.00325	0.334182	1.45688	0.485102	1858.62	23.524	1863.19	25.6283	1869.05	47.3789	1869.05	47.3789	0.558082	2.81752		1869.05	22.9554
17-16	339	421.635	7092.63	0.305345	8.82832	1.64698	4.57424	3.1543	0.290157	2.56395	0.812843	1642.31	37.1724	1744.59	26.284	1870.22	33.143	1870.22	33.143	12.1861	2.52433		1870.22	54.4345
17-16	48	116.746	10563.1	0.962289	8.52571	3.50081	5.30497	4.36375	0.335897	1.58575	0.363392	1866.9	25.7033	1869.66	37.2854	1873.5	73.313	1873.5	73.313	0.352363	4.13367		1873.5	23.7068
17-16	78	403.957	27851.2	0.247119	8.68209	1.59105	5.01449	2.96926	0.317024	2.3723	0.798955	1775.18	36.8118	1821.77	25.1378	1876.24	32.1878	1876.24	32.1878	5.38638	2.54638		1876.24	29.3874
17-16	212	153.208	12118.6	0.255729	8.75416	2.97046	4.96383	4.55365	0.313518	3.10775	0.682473	1758	47.8181	1813.18	38.4887	1877.98	59.9847	1877.98	59.9847	6.38889	3.92731		1877.98	67.4211
17-16	465	307.401	8514.51	0.3089	8.68999	1.67776	5.25432	2.42163	0.331653	1.50142	0.620004	1846.39	24.1054	1861.47	20.6581	1879.13	34.2371	1879.13	34.2371	1.74256	2.20237		1879.13	35.1585
17-16	472	202.592	6338.44	0.681431	8.70952	3.10976	5.30075	3.95255	0.333578	1.43374	0.362738	1855.7	23.1189	1868.98	33.767	1884.55	66.3327	1884.55	66.3327	1.5309	3.67663		1884.55	66.9868
17-16	37	105.004	9849.54	0.953465	8.54859	6.83458	5.47155	7.35863	0.343647	1.64917	0.224114	1904.19	27.1902	1896.14	63.193	1888.11	129.13	1888.11	129.13	-0.851672	7.04606		1888.11	98.9311
17-16	79	208.046	17104.9	0.124939	8.60216	2.49855	5.08014	2.8688	0.318566	1.32547	0.462029	1782.72	20.6436	1832.8	24.3396	1890.92	45.7831	1890.92	45.7831	5.7222	2.53029		1890.92	41.0386
17-16	302	497.852	14113	0.522224	8.88134	1.39191	5.07117	2.04439	0.317104	1.26022	0.61643	1775.57	19.559	1831.3	17.3396	1896.02	28.9478	1896.02	28.9478	6.35266	1.76307		1896.02	87.5676
17-16	134	440.23	44508.8	0.291686	8.63761	1.5026	5.13308	1.9758	0.320869	1.26847	0.642003	1793.97	19.864	1841.6	16.7912	1896.61	27.2386	1896.61	27.2386	5.4118	1.71531		1896.61	39.2447
17-16	504	247.151	7014.02	0.265961	8.56407	1.71401	5.36083	3.32965	0.335025	1.41269	0.424277	1862.69	22.8536	1878.62	28.4955	1897.05	54.2182	1897.05	54.2182	1.81095	3.05393		1897.05	27.2207
17-16	452	338.034	8499.38	0.652742	8.60648	1.96403	5.49018	2.95297	0.340418	1.83547	0.621567	1888.68	30.0496	1899.06	25.3654	1911.19	41.5251	1911.19	41.5251	1.17771	2.66127		1911.19	53.9581
17-16	342	400.358	12575.4	0.281948	8.6552	1.95538	5.29065	3.04453	0.326496	1.96842	0.646541	1821.38	31.2326	1867.35	26.0009	1919.69	41.6513	1919.69	41.6513	5.12133	2.62387		1919.69	72.5336
17-16	540	443.471	13170.2	0.597494	8.58115	1.69843	5.26491	2.26161	0.324829	1.42742	0.631153	1813.27	22.5614	1863.19	19.2991	1920.13	31.4555	1920.13	31.4555	5.56509	1.94266		1920.13	53.6703
17-16	526	328.83	11844.1	0.439481	8.54412	1.67991	5.48608	2.44585	0.337704	1.17779	0.481546	1875.61	19.1674	1898.42	21.0066	1924.21	38.4199	1924.21	38.4199	2.5255	2.18634		1924.21	49.6897
17-16	358	258.341	7847.36	0.533531	8.52757	2.75561	5.56531	4.47532	0.34174	3.2404	0.724059	1895.03	53.2042	1910.75	38.5248	1928.61	55.2997	1928.61	55.2997	1.74103	3.94311		1928.61	67.0844
17-16	538	223.664	5890.39	0.353046	8.45225	2.37418	5.53046	4.15772	0.338562	2.2703	0.546046	1879.75	37.0171	1905.34	35.7559	1934.09	62.3572	1934.09	62.3572	2.81003	3.67178		1934.09	50.5325
17-16	390	442.301	14599.5	0.830279	8.54596	1.55329	5.50556	2.33255	0.329048	1.41425	0.606313	1833.77	22.5717	1901.46	20.0443	1976.93	33.0393	1976.93	33.0393	7.24172	1.9253		1976.93	101.013
17-16	394	63.3294	2379.93	1.02285	8.13604	5.89547	5.83425	7.02333	0.348529	1.86645	0.26575	1927.57	31.0967	1951.51	60.8972	1977.77	120.62	1977.77	120.62	2.53796	6.14847		1977.77	83.3798
17-16	512	247.677	7826.22	0.0848935	8.24898	3.45982	5.69396	5.41184	0.339445	3.58112	0.661719	1884	58.5039	1930.45	46.7502	1981.45	72.241	1981.45	72.241	4.91824	4.55353		1981.45	71.5322
17-16	199	875.413	67815	0.375568	8.03492	1.82949	5.61026	6.05688	0.321635	5.77201	0.952967	1797.71	90.5532	1917.68	52.2082	2050.76	32.4192	2050.76	32.4192	12.3394	4.62794		2050.76	68.3191
17-16	331	807.179	20667.9	0.829483	7.91086	1.2503	6.06921	1.90632	0.34392	1.38315	0.725562	1905.5	22.8177	1985.83	16.6187	2071.29	23.1122	2071.29	23.1122	8.00442	1.50576		2071.29	53.3419
17-16	8	40.4782	5870.83	1.13484	6.82331	6.18394	8.00123	6.93386	0.402689	2.30937	0.333057	2181.41	42.7387	2231.16	62.6033	2277.88	112.636	2277.88	112.636	4.23513	5.0935		2277.88	77.3083
17-16	596	114.217	5321.81	0.0155347	6.24977	10.5601	9.33131	12.2352	0.422695	5.55899	0.454343	2272.7	106.473	2371.1	112.324	2457.53	184.405	2457.53	184.405	7.5209	8.18076		2457.53	174.138
17-16	239	204.647	30562.3	0.46503	5.94907	1.63463	10.9287	2.54406	0.474096	1.94141	0.763113	2501.5	40.251	2517.08	23.6675	2530.39	27.5967	2530.39	27.5967	1.14176	1.92166		2530.39	25.5684
17-16	153	340.183	33059.2	0.403625	5.87989	1.54752	10.0158	3.34618	0.433131	2.95315	0.882543	2319.82	57.536	2436.24	30.8946	2535.65	26.3969	2535.65	26.3969	8.51197	2.46086		2535.65	10.0328
17-16	275	315.6	41812.8	0.425203	5.81086	1.38903	10.6204	2.09931	0.448549	1.5497	0.738195	2388.8	30.9346	2490.49	19.4823	2575.22	23.666	2575.22	23.666	7.23923	1.47298		2575.22	27.7932
17-16	345	185.018	3653.71	1.41867	5.77978	2.16349	11.7009	3.78715	0.487149	1.85672	0.490269	2558.33	39.2079	2580.77	35.43	2599.14	55.0295	2599.14	55.0295	1.5703	2.57264		2599.14	53.139
17-16	41	297.257	40171.1	0.731672	5.62526	1.40785	11.2903	2.02782	0.464964	1.43488	0.707596	2461.44	29.358	2547.41	18.9154	2617.29	23.8484	2617.29	23.8484	5.95483	1.41156		2617.29	15.8531
17-16	600	143.237	963.635	0.627861	5.35026	2.52968	11.1754	10.1475	0.459879	4.85436	0.47838	2439.02	98.5792	2537.87	94.6417	2618.57	148.347	2618.57	148.347	6.85668	6.482		2618.57	-50.792
17-16	411	261.284	10503.1	1.31686	5.52413	1.62166	11.4554	3.34507	0.455933	2.84074	0.849234	2421.58	57.3473	2560.95	31.2408	2673.93	29.2318	2673.93	29.2318	9.43772	2.36216		2673.93	45.0128
17-16	350	175.101	6394.28	0.763049	5.57907	2.2255	11.3294	5.33845	0.450532	4.71068	0.882406	2397.62	94.3208	2550.62	49.8192	2675.35	41.5675	2675.35	41.5675	10.3811	3.79057		2675.35	71.1689
17-16	192	588.238	73786.4	0.145168	5.55221	1.34635	12.0493	3.95897	0.477623	3.72124	0.939953	2516.91	77.5413	2608.25	37.1223	2680.67	22.3469	2680.67	22.3469	6.10903	2.99664		2680.67	56.7134
17-16	536	211.753	7365.03	0.533471	5.48947	1.54688	11.6881	2.3861	0.461247	1.5318	0.641971	2445.06	31.1697	2579.75	22.3194	2688.03	30.239	2688.03	30.239	9.03885	1.54651		2688.03	47.6857
17-16	136	297.223	45453	0.479728	5.43967	1.31013	12.3904	1.97873	0.487201	1.46058	0.738142	2558.55	30.8449	2634.45	18.5917	2693.98	22.0506	2693.98	22.0506	5.0271	1.38391		2693.98	35.5953
17-16	338	203.533	7235.5	0.774633	5.49067	1.4256	12.4257	2.14231	0.486436	1.44056	0.672432	2555.24	30.3899	2637.13	20.1331	2701.29	26.182	2701.29	26.182	5.40653	1.4513		2701.29	59.7796
17-16	175	208.609	31957.4	0.0425305	5.42741	1.78404	12.2532	2.67609	0.479562	1.98792	0.742843	2525.36	41.5364	2623.99	25.1236	2701.7	29.5741	2701.7	29.5741	6.5272	1.84678		2701.7	45.6018
17-16	448	322.872	14518.5	0.430942	5.45082	1.41743	12.9004	2.42326	0.503102	1.92783	0.795553	2627.11	41.5964	2672.41	22.8362	2707.56	24.2284	2707.56	24.2284	2.97132	1.76468		2707.56	53.8725
17-16	143	118.488	18952.9	0.93444	5.33141	1.91903	12.9333	2.4684	0.503955	1.52054	0.616003	2630.77	32.8455	2674.81	23.2659	2708.97	32.0837	2708.97	32.0837	2.88663	1.67121		2708.97	25.148
17-16	515	174.183	7776.13	0.49686	5.42249	1.72464	12.7336	2.35655	0.496038	1.45302	0.616587	2596.75	31.0572	2660.15	22.1866	2709.43	30.6107	2709.43	30.6107	4.15887	1.57683		2709.43	51.0336
17-16	144	316.7	38511.9	0.205693	5.33985	2.28532	11.7522	4.60559	0.457259	3.99479	0.867379	2427.45	80.8061	2584.86	43.1037	2711.39	37.8091	2711.39	37.8091	10.4723	3.23116		2711.39	35.2951
17-16	592	178.615	7725.94	1.53387	5.38864	1.50459	13.3608	2.29851	0.518655	1.395	0.606917	2693.47	30.7123	2705.49	21.7143	2715.18	30.1239	2715.18	30.1239	0.799596	1.57821		2715.18	43.5675
17-16	459	86.1096	4323.57	0.908824	5.35691	2.28906	13.5405	3.09614	0.52504	1.65145	0.533391	2720.52	36.6519	2718.12	29.2776	2717.04	43.1735	2717.04	43.1735	-0.127855	2.08592		2717.04	46.2821
17-16	445	82.9714	3413.07	1.54768	5.34179	2.64577	13.6654	3.69355	0.529846	1.55642	0.42139	2740.8	34.7495	2726.8	34.9498	2717.16	55.2223	2717.16	55.2223	-0.870177	2.41624		2717.16	46.8664
17-16	444	185.699	9404.84	0.146482	5.41499	2.4659	13.3457	3.53831	0.517138	2.47213	0.698676	2687.03	54.3218	2704.42	33.4261	2718.15	41.7267	2718.15	41.7267	1.14484	2.50936		2718.15	67.7953
17-16	230	258.566	27686.8	0.39321	5.3506	2.00697	12.8105	2.86504	0.496084	2.00288	0.699076	2596.95	42.8128	2665.82	26.9862	2719.2	33.7631	2719.2	33.7631	4.49589	1.97107		2719.2	42.5277
17-16	547	188.812	8146.93	0.742135	5.35939	1.61451	13.2753	2.58662	0.513149	1.44823	0.559891	2670.06	31.6604	2699.43	24.4255	2722.19	35.3121	2722.19	35.3121	1.91519	1.72382		2722.19	42.9736
17-16	344	180.118	7163.58	0.820692	5.42321	2.00444	13.1735	2.89001	0.508015	1.92287	0.66535	2648.15	41.758	2692.16	27.2759	2726.08	35.535	2726.08	35.535	2.85863	1.98741		2726.08	71.6988
17-16	371	188	7797	0.249042	5.32774	2.31402	13.5193	3.27612	0.517286	2.28596	0.697765	2687.66	50.2404	2716.63	30.9765	2738.95	38.6076	2738.95	38.6076	1.87266	2.29735		2738.95	59.5092
17-16	319	232.954	9336.39	0.235082	5.31602	2.28384	13.5308	3.5008	0.515048	2.63522	0.752748	2678.14	57.751	2717.44	33.1031	2747.48	37.884	2747.48	37.884	2.52369	2.49494		2747.48	63.9662
17-16	26	207.724	28607.3	0.534013	5.2345	1.55866	13.4945	2.0311	0.512148	1.29484	0.637508	2665.79	28.2707	2714.9	19.2012	2752.35	25.7163	2752.35	25.7163	3.14494	1.36893		2752.35	33.4843
17-16	402	181.382	8203.1	0.347545	5.1985	1.64143	13.8604	2.4162	0.521973	1.54744	0.640443	2707.54	34.2116	2740.21	22.8837	2765.08	30.4594	2765.08	30.4594	2.08083	1.64144		2765.08	35.9027
17-16	30	78.8861	10336.9	0.80814	5.16145	2.37787	15.2306	3.24977	0.572564	2.07782	0.639373	2918.34	48.7689	2829.77	30.967	2767.97	40.9983	2767.97	40.9983	-5.43244	2.35435		2767.97	37.108
17-16	431	117.989	5552.14	0.93146	5.19266	1.71038	14.0978	2.71024	0.527344	1.58096	0.583328	2730.25	35.1882	2756.31	25.698	2776.15	36.0908	2776.15	36.0908	1.65332	1.80035		2776.15	46.0237
17-16	455	76.314	3551.17	0.628851	5.16855	2.19202	15.1163	3.11371	0.563991	1.70866	0.548753	2883.1	39.7204	2822.6	29.6565	2780.37	42.6615	2780.37	42.6615	-3.69503	2.13833		2780.37	49.1369
17-16	544	147.169	7132.56	1.06055	5.17191	1.51407	14.2084	2.2703	0.527254	1.31103	0.577467	2729.87	29.1769	2763.72	21.5373	2789.22	30.3506	2789.22	30.3506	2.12797	1.49279		2789.22	49.9842
17-16	406	123.595	5180.43	0.523422	5.03855	1.7879	14.4413	2.66317	0.529976	1.74211	0.65415	2741.35	38.9016	2779.15	25.2914	2807.41	32.9373	2807.41	32.9373	2.35284	1.79793		2807.41	28.8068
17-16	5	54.0461	8355.58	0.835978	5.00191	2.86769	14.7398	3.63576	0.539636	1.85556	0.510364	2781.92	41.9255	2798.59	34.5748	2811.33	51.1013	2811.33	51.1013	1.0459	2.33651		2811.33	35.9636
17-16	44	110.538	17278.9	0.302457	4.96282	2.03633	14.2492	2.5164	0.520028	1.45658	0.578833	2699.3	32.1239	2766.44	23.8767	2816.49	33.5179	2816.49	33.5179	4.16072	1.61299		2816.49	16.4388
17-16	492	294.363	10554.1	0.273247	5.04525	1.37449	14.0772	4.38415	0.509999	4.11774	0.939234	2656.63	89.6555	2754.92	41.5691	2828.46	24.5542	2828.46	24.5542	6.07503	3.27296		2828.46	46.7888
17-16	327	60.9576	2840.71	0.433837	4.95153	2.63956	15.2879	5.07374	0.550732	1.95985	0.386274	2828.22	44.8691	2833.35	48.3641	2837.7	76.3177	2837.7	76.3177	0.334135	3.11205		2837.7	42.4375
17-16	161	1063.09	152332	0.0329377	4.89885	1.51117	15.1351	2.1251	0.54331	1.49329	0.702694	2797.29	33.889	2823.78	20.2412	2843.44	24.6361	2843.44	24.6361	1.62309	1.46525		2843.44	15.2953
17-16	399	156.084	9973.82	0.640183	4.90051	1.77981	16.152	3.02971	0.572329	2.35073	0.775892	2917.38	55.1601	2885.83	28.9715	2864.59	31.0931	2864.59	31.0931	-1.84261	2.22032		2864.59	40.4492
17-16	366	153.58	8015.24	0.602804	4.90857	1.56932	15.4302	2.45397	0.544702	1.64431	0.670059	2803.1	37.378	2842.18	23.4017	2870.71	29.6094	2870.71	29.6094	2.35519	1.6461		2870.71	46.5303
17-16	326	195.012	9035.16	1.42551	4.91824	1.5324	15.7241	2.19138	0.55466	1.53628	0.701054	2844.53	35.333	2860.18	20.9212	2871.92	25.3969	2871.92	25.3969	0.953957	1.51023		2871.92	50.4899
17-16	235	192.785	30007.8	0.556669	4.79845	1.55582	16.1082	2.15547	0.561762	1.48623	0.689519	2873.91	34.4623	2883.24	20.6077	2890.46	25.3309	2890.46	25.3309	0.572651	1.47674		2890.46	29.1312
17-16	43	247.256	28442.4	0.691613	4.67311	1.84423	14.2814	6.50574	0.488691	6.23744	0.95876	2565.01	131.999	2768.58	61.7544	2921.21	29.9221	2921.21	29.9221	12.1936	4.60727		2921.21	20.6198
17-16	293	169.944	27699.5	0.590958	4.69872	1.93513	16.5863	2.75251	0.564448	1.94274	0.705804	2884.98	45.1852	2911.22	26.3608	2930.12	31.5308	2930.12	31.5308	1.54036	1.871		2930.12	39.6001
17-16	106	191.226	33142.1	0.347907	4.50221	1.75228	16.5736	2.99164	0.547004	2.42063	0.809133	2812.7	55.1758	2910.49	28.65	2979.54	28.3047	2979.54	28.3047	5.59963	2.05753		2979.54	17.5012
17-16	31	115.408	18045.1	0.56347	4.50795	1.4793	18.4265	2.15892	0.603156	1.50863	0.698791	3042.54	36.5894	3012.28	20.7936	2992.83	24.8363	2992.83	24.8363	-1.66102	1.4854		2992.83	29.4022
17-16	187	180.441	25599	1.07462	4.59915	1.48331	15.6074	4.71032	0.507268	4.45801	0.946435	2644.95	96.7195	2853.07	44.9552	3004.23	24.4447	3004.23	24.4447	11.959	3.29818		3004.23	73.1939
17-16	384	107.696	4291.21	0.89292	4.55206	1.80011	18.0461	2.78119	0.577525	1.52424	0.548053	2938.65	35.9723	2992.19	26.7586	3029.06	37.3014	3029.06	37.3014	2.98501	1.68452		3029.06	85.419
17-16	305	130.971	7233.9	0.685237	4.49668	1.65126	18.0328	2.2046	0.570919	1.34141	0.608461	2911.59	31.427	2991.49	21.2098	3046.32	28.0105	3046.32	28.0105	4.42256	1.35521		3046.32	80.9977
Analyses with >10% discordance; >5% reverse discordance; >10% for >700 Ma and 25%/50% for <700 Ma 2s uncertainty (1200 Ma cutoff for 206Pb/238U versus 207Pb/206Pb age)
17-16	597	362.051	2408.08	0.0412025	14.7739	7.34087	0.603633	10.9954	0.0698749	4.7451	0.431555	435.402	19.978	479.537	42.0309	697.461	211.386	435.402	19.978	37.5734	19.1358		435.402	20.4045
17-16	7	171.569	4009.96	0.909475	13.138	12.6208	0.725032	13.8886	0.0726228	2.72606	0.19628	451.938	11.8981	553.633	59.2887	998.278	276.906	451.938	11.8981	54.7283	12.6141		451.938	12.6955
17-16	227	458.984	9268.8	0.462662	15.8115	5.37457	0.63267	6.08064	0.0733559	1.7376	0.285759	456.342	7.65523	497.758	23.9264	693.984	124.193	456.342	7.65523	34.2431	11.8192		456.342	8.87677
17-16	417	440.11	2576.44	0.217734	15.7316	7.74549	0.599223	14.0147	0.0737796	1.91561	0.136686	458.886	8.4849	476.741	53.3327	564.51	302.71	458.886	8.4849	18.7107	43.6161		458.886	9.61133
17-16	21	572.587	11415.8	0.235052	16.1184	7.50391	0.628756	25.6329	0.0748644	24.2456	0.945876	465.396	108.864	495.32	100.556	637.097	179.021	465.396	108.864	26.9505	26.7081		465.396	108.047
17-16	27	140.039	2144.53	0.225467	11.7181	14.8621	0.844207	16.9927	0.0775639	2.81865	0.165875	481.565	13.079	621.464	79.0223	1171.47	332.285	481.565	13.079	58.8922	11.7135		481.565	13.8984
17-16	150	161.065	3446.84	0.469637	11.554	18.1226	0.890147	19.0865	0.0784258	2.52619	0.132355	486.719	11.8428	646.448	91.3302	1253.96	370.843	486.719	11.8428	61.1853	11.5177		486.719	12.7639
17-16	420	2201.04	675.528	0.217014	11.8204	6.65227	0.713842	14.5127	0.0807026	1.72778	0.119053	500.315	8.3174	547.025	61.3962	747.562	304.839	500.315	8.3174	33.0737	27.3138		500.315	9.65815
17-16	186	1726.02	35662.2	0.287448	16.8108	2.72178	0.678567	4.13864	0.0809995	3.03148	0.732483	502.086	14.643	525.908	16.9884	631.664	60.6837	502.086	14.643	20.5138	7.98032		502.086	15.4354
17-16	487	141.317	1074.01	0.837671	11.9684	13.2744	0.828046	21.6831	0.0840587	2.80705	0.129458	520.304	14.0313	612.527	99.8088	971.067	439.815	520.304	14.0313	46.4194	24.3106		520.304	14.9164
17-16	525	713.607	3359.02	0.522017	13.8562	3.77433	0.802281	7.45891	0.0843007	3.10398	0.416144	521.742	15.5567	598.115	33.717	900.307	139.936	521.742	15.5567	42.0484	9.17174		521.742	16.3587
17-16	241	567.823	16268	0.239031	13.922	7.28479	0.835328	33.5345	0.0856444	32.7149	0.975558	529.726	166.379	616.564	155.278	950.75	150.799	529.726	166.379	44.2834	19.6046		529.726	164.339
17-16	240	1252.42	27386	0.17997	12.9374	6.08981	0.91281	33.3898	0.0864859	32.8189	0.982901	534.721	168.418	658.55	162.134	1110.29	122.835	534.721	168.418	51.8396	16.0774		534.721	166.326
17-16	499	1438.38	12685.9	0.123008	14.55	2.67397	0.824637	4.43908	0.0878803	3.33453	0.751176	542.989	17.3646	610.632	20.3715	871.179	60.6708	542.989	17.3646	37.672	4.77642		542.989	18.1374
17-16	218	200.389	4509.59	0.173042	12.4386	11.1838	0.96233	12.4258	0.0892344	3.5254	0.283717	551.008	18.6182	684.503	61.8926	1153.19	236.722	551.008	18.6182	52.2187	9.94036		551.008	19.3568
17-16	519	265.273	2101.28	0.701985	13.3804	8.88156	0.874002	18.3849	0.091673	14.3795	0.782138	565.424	77.8426	637.738	87.1164	903.987	236.3	565.424	77.8426	37.4522	18.4788		565.424	77.5697
17-16	205	530.687	5173.58	0.214777	15.2016	4.16855	0.850388	9.46315	0.0970331	2.31014	0.24412	596.998	13.1722	624.862	44.166	728.025	194.597	596.998	13.1722	17.9976	21.9934		596.998	14.3893
17-16	389	128.775	1263.63	0.48278	11.6796	15.076	1.06628	33.6043	0.0994884	3.74899	0.111563	611.41	21.8683	736.916	176.522	1140.89	668.518	611.41	21.8683	46.4095	31.4604		611.41	22.6276
17-16	35	616.347	19509.9	0.284226	15.2501	5.51001	0.892021	13.648	0.099903	12.4164	0.909757	613.841	72.7012	647.455	65.3579	767.389	119.4	613.841	72.7012	20.0092	15.6415		613.841	72.537
17-16	258	898.694	2846.28	0.0987441	13.1644	2.8636	0.981928	3.54668	0.100235	1.42681	0.402295	615.786	8.37952	694.593	17.8425	959.698	66.3835	615.786	8.37952	35.8354	4.52341		615.786	10.3017
17-16	584	301.892	2974.96	0.733425	13.1771	9.10355	1.00837	12.2798	0.100513	3.7345	0.304118	617.417	21.9877	708.049	62.623	1008.15	237.453	617.417	21.9877	38.7572	14.5887		617.417	22.7571
17-16	188	956.258	1942.4	0.174256	10.9704	6.0556	1.20123	40.9624	0.101847	37.7498	0.921572	625.224	224.959	801.153	227.926	1328.66	308.234	625.224	224.959	52.9434	20.1455		625.224	221.181
17-16	513	415.186	4424.32	0.210939	13.7071	5.7162	1.02878	24.9197	0.105106	23.6277	0.948152	644.265	144.871	718.316	128.481	957.969	161.935	644.265	144.871	32.7469	18.9193		644.265	143.394
17-16	267	2216.64	47505.5	0.149498	12.9462	4.30209	1.12569	17.065	0.105976	16.506	0.967244	649.337	101.961	765.697	91.8229	1123.04	86.3753	649.337	101.961	42.1805	10.1096		649.337	101.353
17-16	343	47.5648	479.733	0.603511	8.54091	29.1919	1.32025	46.9729	0.106052	5.53879	0.117915	649.777	34.2355	854.624	273.027	1432.48	902.41	649.777	34.2355	54.6396	28.6752		649.777	34.7205
17-16	340	1327.5	10451	0.311456	10.412	3.70052	1.45293	6.74252	0.108359	4.93914	0.732535	663.21	31.1282	911.085	40.5573	1572.79	85.9614	663.21	31.1282	57.8323	3.03788		663.21	31.7104
17-16	590	891.138	8886.67	0.313056	12.5562	6.32013	1.20541	36.234	0.109608	35.6429	0.983688	670.47	226.991	803.08	201.752	1191.96	128.675	670.47	226.991	43.7508	19.9881		670.47	223.153
17-16	183	1339.64	41272.2	0.157701	15.0594	2.4482	1.0224	5.23936	0.109805	4.54396	0.867273	671.614	28.9819	715.117	26.8959	855.08	54.1791	671.614	28.9819	21.456	6.02122		671.614	29.6387
17-16	382	499.81	2198.96	0.271354	14.7241	4.81038	1.02775	13.5001	0.116358	2.79068	0.206715	709.565	18.7508	717.802	69.5042	744.536	279.56	709.565	18.7508	4.69709	35.873		709.565	19.9395
17-16	579	968.954	1782.37	0.457093	13.6191	2.59597	1.06986	5.83126	0.116947	1.5701	0.269256	712.966	10.5975	738.672	30.6063	818.35	117.362	712.966	10.5975	12.8776	12.5614		712.966	12.6351
17-16	101	850.096	15593.4	0.158728	13.9108	2.72592	1.16032	3.38908	0.119666	1.91281	0.564403	728.642	13.1787	782.106	18.4835	938.709	57.3945	728.642	13.1787	22.3783	4.94924		728.642	14.927
17-16	108	801.718	27905.3	0.0814079	11.0644	2.76762	1.48169	3.59975	0.120586	2.12214	0.589523	733.934	14.7212	922.921	21.8237	1407.48	55.6704	733.934	14.7212	47.8548	2.31255		733.934	16.321
17-16	242	835.573	22793.2	0.174741	13.7484	3.24432	1.2122	5.699	0.122286	4.43814	0.778758	743.706	31.174	806.201	31.7112	983.829	72.7912	743.706	31.174	24.4069	6.42817		743.706	31.9118
17-16	457	1073.56	9256.68	0.104534	13.8519	2.92649	1.23211	14.3437	0.123736	13.6123	0.94901	752.029	96.6246	815.299	80.4361	993.006	91.939	752.029	96.6246	24.2675	11.9937		752.029	96.1742
17-16	500	323.117	4183.76	0.251528	13.2777	5.37652	1.24287	8.9684	0.124031	6.53286	0.728431	753.721	46.4702	820.181	50.4726	1005.81	124.718	753.721	46.4702	25.0636	10.3772		753.721	46.8653
17-16	76	677.261	21325.5	0.230839	12.9721	3.03626	1.32414	3.80376	0.125871	2.25716	0.593404	764.267	16.2674	856.324	22.0055	1103.73	61.1798	764.267	16.2674	30.7559	4.11146		764.267	17.8348
17-16	243	1365.36	11566.8	0.216737	12.9578	1.667	1.32656	8.37477	0.127063	8.03762	0.959741	771.089	58.4144	857.381	48.4952	1088.52	47.1028	771.089	58.4144	29.1614	6.1802		771.089	58.6176
17-16	181	1251.78	48600.7	0.143963	13.4331	3.0128	1.33029	8.5951	0.127561	8.0281	0.934032	773.937	58.548	859.008	49.8316	1086.34	61.5452	773.937	58.548	28.7573	6.73329		773.937	58.7522
17-16	591	452.205	5470.85	0.650274	11.2699	4.14876	1.56239	6.45706	0.129296	3.58356	0.554983	783.85	26.4491	955.415	39.982	1375.42	103.31	783.85	26.4491	43.0103	4.69266		783.85	27.4467
17-16	277	184.382	4566.9	0.244638	13.075	7.08147	1.32714	16.0514	0.131252	12.5103	0.779389	795.005	93.571	857.632	93.0125	1024.07	203.577	795.005	93.571	22.3682	17.9346		795.005	93.2045
17-16	565	428.892	5613.45	0.525359	12.7479	3.73158	1.38599	7.79769	0.131372	4.33739	0.55624	795.687	32.4672	882.992	46.0004	1109.47	129.482	795.687	32.4672	28.2826	8.86665		795.687	33.2715
17-16	489	471.513	7047.6	0.246068	10.7676	6.86787	1.75922	12.7519	0.138192	10.4341	0.818239	834.429	81.667	1030.56	82.5998	1474.96	139.117	834.429	81.667	43.4271	7.68953		834.429	81.5394
17-16	291	413.578	16747.5	0.299639	12.9745	4.90409	1.46783	11.7987	0.138975	10.5512	0.894272	838.863	82.9945	917.234	71.2856	1111.68	105.426	838.863	82.9945	24.5412	10.3414		838.863	82.8477
17-16	135	887.295	39624.2	0.133933	10.745	5.08843	1.78686	24.4637	0.139109	23.9257	0.978006	839.621	188.366	1040.68	159.595	1491.97	96.595	839.621	188.366	43.724	13.1406		839.621	185.82
17-16	263	1338.88	6204.43	0.187051	10.475	1.43949	1.79242	2.83659	0.139273	2.39724	0.845114	840.553	18.8917	1042.71	18.4883	1495.61	28.6889	840.553	18.8917	43.7988	1.66064		840.553	20.5065
17-16	413	1183.37	3268.75	0.639939	12.7033	2.195	1.4578	13.3243	0.139812	6.3942	0.479892	843.598	50.5612	913.1	80.288	1085.99	234.517	843.598	50.5612	22.3199	17.4089		843.598	51.0014
17-16	260	698.371	23064.1	0.331533	13.4992	2.47285	1.41846	7.33861	0.139835	6.8144	0.928569	843.729	53.8918	896.717	43.7108	1030.55	55.1014	843.729	53.8918	18.1286	6.81974		843.729	54.266
17-16	419	576.496	5016.64	0.275007	11.755	4.79696	1.61168	18.6954	0.140086	17.8929	0.957074	845.146	141.734	974.761	117.275	1280.4	105.618	845.146	141.734	33.9936	12.3361		845.146	140.419
17-16	423	597.379	7554.5	0.255382	13.9252	4.28019	1.37777	11.1895	0.140836	8.9927	0.80367	849.388	71.5654	879.489	65.857	956.895	136.126	849.388	71.5654	11.235	14.6761		849.388	71.6266
17-16	36	124.88	5018.39	0.363118	10.9593	11.1368	1.72022	19.349	0.141202	15.5987	0.806176	851.459	124.423	1016.11	124.397	1391.07	219.856	851.459	124.423	38.7912	13.1752		851.459	123.495
17-16	367	871.138	12707.1	0.159865	13.2767	3.01248	1.51879	11.9022	0.146151	11.4478	0.961824	879.349	94.1037	937.99	72.9036	1079.26	65.3301	879.349	94.1037	18.5233	10.0175		879.349	93.7912
17-16	587	1185.39	13186.8	0.213447	13.166	2.41048	1.55402	9.10704	0.14707	8.74709	0.960475	884.516	72.2969	952.094	56.2796	1112.59	50.6595	884.516	72.2969	20.499	7.43835		884.516	72.3808
17-16	272	1204.7	32044.4	0.181003	12.959	1.60177	1.55614	3.2189	0.147162	2.71788	0.844353	885.034	22.4761	952.934	19.8982	1114.05	34.4319	885.034	22.4761	20.5568	3.17791		885.034	23.9701
17-16	234	2407.69	17914.1	0.140889	11.2657	2.94312	1.79059	9.1817	0.147635	8.67245	0.944537	887.693	71.9201	1042.04	59.8383	1382.52	57.9305	887.693	71.9201	35.7917	5.85666		887.693	72.014
17-16	498	998.433	12066.2	0.333047	12.9628	2.34669	1.56438	3.19973	0.14765	2.06359	0.644925	887.777	17.1145	956.203	19.8206	1118.02	48.7596	887.777	17.1145	20.5937	3.78635		887.777	19.073
17-16	545	1359.37	10837.7	0.158602	12.436	1.4809	1.63695	2.761	0.148065	1.9966	0.723145	890.107	16.5995	984.539	17.4037	1202.35	37.5628	890.107	16.5995	25.9691	2.69354		890.107	18.6237
17-16	524	104.872	1474.7	0.568831	12.8287	13.9787	1.42016	91.0151	0.148485	88.1237	0.968231	892.468	735.258	897.431	555.768	910.551	470.003	892.468	735.258	1.98604	95.2886		892.468	695.595
17-16	280	264.606	9399.76	0.289591	13.5678	5.63047	1.4851	7.30733	0.149534	2.40592	0.329247	898.35	20.1752	924.315	44.3475	987.694	140.429	898.35	20.1752	9.0457	13.0921		898.35	21.8852
17-16	173	1311.17	49429.6	0.0991428	12.3126	2.16785	1.70274	9.24842	0.151676	8.97827	0.97079	910.349	76.2257	1009.56	59.1786	1232.48	43.5105	910.349	76.2257	26.1366	6.712		910.349	76.2649
17-16	537	315.51	3820.58	0.552949	13.6426	6.39923	1.48117	10.0347	0.151684	3.45913	0.344716	910.397	29.3693	922.71	60.8435	953.17	192.816	910.397	29.3693	4.48751	19.5652		910.397	30.5535
17-16	169	246.595	9086.82	0.228045	13.8508	6.56169	1.48238	7.58579	0.152341	2.80577	0.369872	914.075	23.9115	923.205	46.0041	945.978	144.36	914.075	23.9115	3.37255	14.9608		914.075	25.4005
17-16	595	518.397	5883.76	1.26988	13.8334	3.76208	1.50735	5.38634	0.154064	1.51343	0.280975	923.704	13.0242	933.368	32.8822	957.129	105.69	923.704	13.0242	3.49227	10.7433		923.704	15.7002
17-16	217	117.077	6147.68	0.426228	11.9046	12.0978	1.78132	13.8221	0.155358	5.92118	0.428385	930.926	51.3269	1038.66	89.9453	1273.8	243.854	930.926	51.3269	26.9176	14.5594		930.926	51.8774
17-16	581	560.622	7265.18	0.102647	14.0565	2.75362	1.50612	5.4826	0.15556	1.69687	0.309501	932.053	14.7256	932.87	33.4591	935.695	106.903	932.053	14.7256	0.389136	11.4889		932.053	17.1707
17-16	528	302.06	3940.04	0.495412	14.1249	5.37908	1.46423	11.4053	0.155822	1.56885	0.137555	933.517	13.6344	915.751	68.8382	874.098	234.133	933.517	13.6344	-6.79769	28.6489		933.517	16.2553
17-16	15	246.329	9025.58	0.28365	13.8543	6.26773	1.52685	7.55412	0.156165	1.69792	0.224768	935.43	14.7843	941.232	46.356	955.704	150.554	935.43	14.7843	2.12132	15.4965		935.43	17.2362
17-16	351	515.039	7908.09	0.596134	14.2315	3.21342	1.51844	5.55268	0.156406	1.52827	0.275232	936.771	13.3248	937.848	33.9969	941.292	109.446	936.771	13.3248	0.480313	11.6576		936.771	16.0134
17-16	278	248.758	11536.5	0.356421	13.539	7.37657	1.57608	8.01254	0.157624	2.11174	0.263555	943.561	18.5359	960.825	49.7858	1001.42	156.988	943.561	18.5359	5.77733	14.8864		943.561	20.5626
17-16	166	338.257	11037.8	0.151697	13.7809	5.57551	1.55343	5.88934	0.157733	1.60382	0.272326	944.169	14.0861	951.857	36.384	970.577	115.625	944.169	14.0861	2.72086	11.6794		944.169	16.6849
17-16	373	720.823	9203.91	0.355529	12.5577	3.02737	1.75064	6.11975	0.15788	5.04743	0.824778	944.987	44.3665	1027.4	39.5532	1208.19	68.1254	944.987	44.3665	21.7852	5.73887		944.987	45.1097
17-16	328	202.135	3144.28	0.320836	13.8374	6.7957	1.50555	8.00476	0.157891	1.7407	0.217458	945.048	15.3014	932.637	48.8488	904.3	161.102	945.048	15.3014	-4.50607	18.6946		945.048	17.7228
17-16	442	689.786	7316.67	0.142332	13.6877	2.53676	1.57657	5.95949	0.15791	2.71724	0.455951	945.151	23.888	961.019	37.0304	998.372	107.76	945.151	23.888	5.33081	10.4946		945.151	25.4737
17-16	141	273.638	11821.4	0.194892	13.6385	5.63521	1.5696	6.01857	0.158534	1.59999	0.265842	948.627	14.114	958.267	37.3332	981.366	118.151	948.627	14.114	3.33605	11.7264		948.627	16.7294
17-16	329	450.194	5382.32	0.131377	14.3689	3.38437	1.49328	6.02719	0.159005	1.44	0.238918	951.244	12.7352	927.654	36.6575	872.88	121.232	951.244	12.7352	-8.97761	15.2057		951.244	15.6016
17-16	148	89.5428	4081.48	0.442869	12.2419	11.169	1.71678	12.6298	0.159415	1.85717	0.147047	953.525	16.4611	1014.82	81.0806	1150.46	248.292	953.525	16.4611	17.1179	17.9448		953.525	18.7649
17-16	281	304.09	15337.9	0.130435	13.8563	5.38757	1.56329	6.00271	0.159502	1.77829	0.296248	954.01	15.7694	955.77	37.1764	960.733	117.16	954.01	15.7694	0.699778	12.2203		954.01	18.1659
17-16	246	227.541	10466.6	0.522285	14.6395	6.06862	1.47296	6.81114	0.15969	2.17283	0.319012	955.052	19.2877	919.342	41.1986	835.52	134.526	955.052	19.2877	-14.3062	18.5485		955.052	21.2823
17-16	469	245.272	3046.45	0.480058	13.5325	6.50086	1.55962	11.0568	0.159826	1.53329	0.138673	955.808	13.6206	954.317	68.4335	951.789	224.185	955.808	13.6206	-0.422284	23.6968		955.808	16.3519
17-16	478	354.157	5222.17	0.117996	13.8354	4.94493	1.56237	5.98896	0.159936	1.62788	0.271814	956.422	14.4695	955.408	37.0828	953.972	117.885	956.422	14.4695	-0.256747	12.4815		956.422	17.0657
17-16	502	184.712	2798.75	0.412643	13.6868	7.18476	1.50977	10.6668	0.160071	1.91684	0.179702	957.171	17.0503	934.348	65.1762	881.781	217.17	957.171	17.0503	-8.54969	26.804		957.171	19.2966
17-16	179	209.769	12959.3	0.325563	14.2667	7.22753	1.55818	7.85917	0.16059	2.63399	0.335148	960.052	23.4948	953.745	48.6156	940.094	151.776	960.052	23.4948	-2.12302	16.6758		960.052	25.1546
17-16	510	240.631	4570.47	0.142819	13.7085	5.4735	1.57059	6.53502	0.16064	1.6099	0.24635	960.334	14.364	958.66	40.5475	955.692	129.504	960.334	14.364	-0.485782	13.6994		960.334	16.995
17-16	210	156.001	7214.54	0.774552	12.2432	63.2003	1.78854	88.8757	0.161262	62.4466	0.702628	963.785	559.372	1041.29	595.293	1208.64	1277.15	963.785	559.372	20.2589	96.1346		963.785	536.167
17-16	16	305.504	13572.4	0.0822717	14.0878	5.3438	1.56196	5.89449	0.16128	2.18911	0.371382	963.884	19.5988	955.244	36.4939	936.27	112.289	963.884	19.5988	-2.94935	12.5231		963.884	21.596
17-16	560	246.103	2618.23	0.244317	13.4618	8.21137	1.55193	14.1706	0.161464	1.70695	0.120458	964.908	15.2971	951.261	87.5567	920.736	289.57	964.908	15.2971	-4.79736	33.0004		964.908	17.8082
17-16	569	505.624	6488.71	0.284545	13.9529	3.87423	1.57246	6.53244	0.162328	1.43052	0.218987	969.702	12.8789	959.399	40.5503	936.749	130.711	969.702	12.8789	-3.51785	14.5098		969.702	15.8125
17-16	295	209.405	7272.29	0.395138	12.2153	7.01903	1.80043	8.82357	0.162583	3.04975	0.345636	971.114	27.4937	1045.61	57.6159	1205.59	163.159	971.114	27.4937	19.4488	11.1374		971.114	28.9335
17-16	493	300.643	3905.39	0.204904	13.987	5.38474	1.54724	9.4045	0.162874	1.87541	0.199416	972.728	16.933	949.393	58.0192	896.569	190.27	972.728	16.933	-8.49446	23.102		972.728	19.2585
17-16	533	441.698	5301.61	0.0864204	13.6744	3.94186	1.61132	6.96816	0.162965	1.67429	0.240277	973.235	15.1244	974.62	43.6653	978.611	137.889	973.235	15.1244	0.549322	14.0979		973.235	17.6986
17-16	404	356.571	7057.14	0.407635	14.1161	3.55827	1.55812	6.34248	0.163023	1.61792	0.255093	973.557	14.6197	953.72	39.2304	909.109	126.337	973.557	14.6197	-7.08912	14.9686		973.557	17.2726
17-16	527	374.824	4232.49	0.237098	14.4754	4.76296	1.50228	6.61695	0.163166	1.47406	0.22277	974.35	13.3298	931.31	40.3422	831.709	134.511	974.35	13.3298	-17.1503	19.0142		974.35	16.2037
17-16	401	284.144	3706.11	0.155133	14.247	3.94168	1.53943	9.67775	0.163868	1.59659	0.164975	978.238	14.4911	946.277	59.5872	873.519	197.815	978.238	14.4911	-11.9881	25.4147		978.238	17.1865
17-16	427	295.495	4752.23	0.456067	13.5787	4.63244	1.61582	6.34778	0.163873	3.6117	0.568971	978.265	32.7818	976.37	39.8192	973.016	106.43	978.265	32.7818	-0.539475	11.5017		978.265	33.9811
17-16	453	461.131	5948.01	0.273309	14.0145	3.29819	1.59276	6.8352	0.163897	1.74148	0.254782	978.396	15.8086	967.378	42.6415	943.301	135.42	978.396	15.8086	-3.72043	14.9841		978.396	18.3072
17-16	479	139.314	1926.9	0.76766	12.8324	8.09476	1.63395	13.0651	0.165217	3.16422	0.242188	985.703	28.9223	983.382	82.3403	979.07	258.463	985.703	28.9223	-0.677529	26.7414		985.703	30.3241
17-16	321	357.718	6150.18	0.0956541	14.1518	4.58747	1.58959	6.51311	0.165426	2.84101	0.436198	986.861	25.9963	966.136	40.6004	920.187	120.559	986.861	25.9963	-7.24574	14.3321		986.861	27.5704
17-16	127	1084.41	18439	0.196376	9.47384	1.89379	2.43573	3.33679	0.165919	2.70389	0.810327	989.587	24.8048	1253.21	24.0209	1740.64	35.8363	989.587	24.8048	43.1479	1.84412		989.587	26.4656
17-16	274	139.309	5714.13	0.347876	12.9539	7.45102	1.71516	9.57532	0.166573	1.979	0.206677	993.199	18.2161	1014.22	61.4362	1060.77	188.591	993.199	18.2161	6.37033	16.7344		993.199	20.4724
17-16	575	98.9606	1170.46	0.988875	11.5701	11.4064	1.73682	27.1379	0.167662	3.31122	0.122015	999.216	30.6495	1022.29	175.304	1072.9	543.347	999.216	30.6495	6.86812	47.2508		999.216	31.9987
17-16	396	204.822	2595.6	1.58343	12.5535	7.69272	1.76602	9.24941	0.168058	1.55463	0.168079	1001.4	14.4192	1033.06	59.9806	1101.55	182.455	1001.4	14.4192	9.09152	15.1144		1001.4	17.2367
17-16	131	62.3141	2897.3	0.821807	10.5971	17.4271	2.12339	18.7799	0.169247	3.48658	0.185655	1007.96	32.5337	1156.44	129.813	1447.26	352.132	1007.96	32.5337	30.3538	17.094		1007.96	33.8156
17-16	149	170.503	7077.85	0.337228	12.5904	6.87396	1.81629	8.71796	0.170642	1.64486	0.188675	1015.65	15.4564	1051.35	57.1041	1127.13	170.66	1015.65	15.4564	9.89042	13.7124		1015.65	18.175
17-16	365	385.401	3585.93	0.339437	13.1737	4.27341	2.1703	29.3795	0.215412	28.8604	0.982333	1257.59	329.809	1171.58	204.91	1016.8	111.391	1016.8	111.391	-23.6809	35.1522		1016.8	11.799
17-16	285	176.229	7434.34	0.18637	13.3759	9.27194	1.72587	10.8402	0.170984	2.14966	0.198305	1017.53	20.2345	1018.21	69.7172	1020.55	215.225	1017.53	20.2345	0.296029	21.1199		1017.53	22.3691
17-16	38	203.07	12723.6	0.498104	13.2365	6.23534	1.75161	6.99603	0.171378	1.56227	0.223309	1019.7	14.7344	1027.76	45.2276	1045.85	137.551	1019.7	14.7344	2.50077	12.9003		1019.7	17.587
17-16	129	330.176	16474.7	0.293589	12.1908	3.60293	1.95029	8.89247	0.171489	8.00092	0.899741	1020.31	75.5024	1098.54	59.7051	1257.86	75.844	1020.31	75.5024	18.8854	7.74275		1020.31	75.6701
17-16	548	173.548	1182.68	0.629345	12.64	7.94643	1.60794	16.2232	0.171744	1.86164	0.114751	1021.71	17.5898	973.306	101.649	866.511	334.641	1021.71	17.5898	-17.9109	45.5816		1021.71	20.0384
17-16	42	44.8622	1752.97	0.311998	10.6935	17.8053	2.02326	23.1609	0.172912	4.02091	0.173607	1028.14	38.2124	1123.35	157.701	1313.26	443.837	1028.14	38.2124	21.7114	26.6183		1028.14	39.3089
17-16	209	886.751	37196.8	0.228643	13.1044	62.4825	1.831	88.3273	0.173336	62.4297	0.7068	1030.46	594.954	1056.64	596.657	1111.98	1278.74	1030.46	594.954	7.33044	119.244		1030.46	568.766
17-16	306	94.263	1573.75	0.4389	12.3812	10.2037	1.77899	20.8801	0.173438	3.33334	0.159642	1031.02	31.7602	1037.81	135.924	1053.03	416.308	1031.02	31.7602	2.08964	38.8255		1031.02	33.1361
17-16	429	149.923	1895.52	0.336735	13.042	7.61212	1.68763	10.678	0.173895	1.55486	0.145614	1033.54	14.8481	1003.87	68.1069	940.555	216.673	1033.54	14.8481	-9.88606	25.3633		1033.54	17.7478
17-16	307	63.678	1132.94	1.16713	10.3316	13.3433	2.10568	30.0723	0.174425	3.09047	0.102768	1036.45	29.5888	1150.67	207.752	1373.56	578.572	1036.45	29.5888	24.5431	31.8569		1036.45	31.0918
17-16	70	1119.13	14468.3	0.114215	11.4357	1.61445	2.0837	4.49422	0.174853	3.85792	0.858417	1038.79	37.0136	1143.45	30.8376	1348.63	44.5	1038.79	37.0136	22.9742	3.7406		1038.79	38.1788
17-16	486	238.581	4302.74	0.651086	13.5901	6.19501	1.74295	11.0464	0.176874	1.70744	0.15457	1049.88	16.5424	1024.56	71.301	971.733	222.762	1049.88	16.5424	-8.04163	24.8261		1049.88	19.2543
17-16	361	147.059	2686.79	0.629162	12.8029	6.52424	1.83269	15.2102	0.178608	1.75979	0.115698	1059.37	17.1914	1057.24	100.001	1053.76	304.751	1059.37	17.1914	-0.531973	29.1199		1059.37	19.8533
17-16	509	62.5412	994.527	0.444915	10.4698	15.9082	2.04454	31.2459	0.179491	2.95398	0.0945398	1064.2	28.9784	1130.48	213.844	1260.94	611.497	1064.2	28.9784	15.6031	40.993		1064.2	30.5934
17-16	550	68.2616	871.715	0.890652	10.9086	16.2045	1.91416	25.3233	0.179919	2.3448	0.0925944	1066.53	23.0488	1086.04	169.286	1126.23	504.391	1066.53	23.0488	5.30121	42.4607		1066.53	25.097
17-16	403	223.971	3260.23	0.376415	13.4465	4.92306	1.75345	7.32654	0.180382	1.80398	0.246225	1069.06	17.7714	1028.44	47.3831	943.881	145.493	1069.06	17.7714	-13.2625	17.5599		1069.06	20.3965
17-16	407	178.292	2258.49	0.34388	13.1631	6.6154	1.7657	19.2477	0.182279	1.62901	0.0846341	1079.42	16.1905	1032.94	124.93	936.708	394.179	1079.42	16.1905	-15.235	48.5232		1079.42	19.0887
17-16	535	201.267	3043.1	0.308725	13.3581	7.07359	1.80108	11.7462	0.182839	1.63865	0.139505	1082.47	16.3286	1045.85	76.7258	971.006	237.453	1082.47	16.3286	-11.4787	27.3132		1082.47	19.2194
17-16	574	99.3042	1495.4	0.327031	12.856	9.3159	1.75313	29.1097	0.184299	2.51065	0.086248	1090.42	25.1865	1028.32	188.757	899.33	601.165	1090.42	25.1865	-21.248	81.0977		1090.42	27.1389
17-16	501	1116.58	4062.52	0.312407	9.37121	1.50063	2.65564	4.88955	0.184415	4.24941	0.869081	1091.05	42.6522	1316.21	36.0704	1705.28	44.5287	1091.05	42.6522	36.0193	3.00784		1091.05	43.7214
17-16	14	654.002	7259.76	0.31752	12.9129	3.25433	2.284	35.2965	0.21847	34.7912	0.985683	1273.78	402.258	1207.35	250.524	1091.27	119.236	1091.27	119.236	-16.7251	39.0055		1091.27	27.0475
17-16	356	565.945	2800.01	0.572858	12.6293	2.62411	1.94586	12.9862	0.185837	1.50322	0.115756	1098.78	15.1862	1097.02	87.1519	1094.41	258.506	1098.78	15.1862	-0.39936	23.7554		1098.78	18.3417
17-16	18	159.178	6465.87	0.745042	13.1201	6.7684	1.90775	7.57905	0.186293	1.62243	0.214068	1101.26	16.4244	1083.8	50.5008	1049.76	149.27	1101.26	16.4244	-4.90672	14.9991		1101.26	19.3863
17-16	424	201.12	2742.46	0.854509	14.1762	6.23984	1.7014	10.6599	0.186652	1.79682	0.168558	1103.21	18.2193	1009.06	68.197	810.777	219.921	1103.21	18.2193	-36.0684	36.9765		1103.21	20.93
17-16	103	912.386	40486.1	0.249904	10.3226	2.99595	2.46176	14.2827	0.186656	13.951	0.976777	1103.23	141.468	1260.88	103.22	1541.78	57.5419	1103.23	141.468	28.4444	9.55633		1103.23	140.304
17-16	68	151.856	3265.63	0.282361	12.3182	6.8412	1.96586	11.4851	0.186733	2.77788	0.241867	1103.65	28.1773	1103.89	77.3353	1105.25	222.959	1103.65	28.1773	0.144824	20.3041		1103.65	29.9567
17-16	34	146.181	7135.22	0.360866	9.67127	6.37886	2.61124	9.23877	0.186861	6.46392	0.699651	1104.35	65.6048	1303.8	67.8572	1649.79	122.413	1104.35	65.6048	33.0615	6.36253		1104.35	66.0806
17-16	52	133.448	6661.89	0.447219	12.6671	6.47845	1.95091	8.03764	0.187444	1.52432	0.189648	1107.51	15.5115	1098.76	53.9686	1082.32	158.35	1107.51	15.5115	-2.3278	15.0396		1107.51	18.6525
17-16	422	1095.23	10608.9	0.206354	6.73128	6.2565	3.87114	19.501	0.187867	18.4608	0.946659	1109.81	188.227	1607.68	157.677	2340.34	107.544	1109.81	188.227	52.5792	8.33269		1109.81	185.799
17-16	484	409.745	6716.73	0.398178	13.1469	3.67931	1.95282	7.48608	0.188301	3.53356	0.472017	1112.17	36.096	1099.42	50.2804	1075.16	132.589	1112.17	36.096	-3.44204	13.1909		1112.17	37.4683
17-16	434	242.644	3702.55	0.373126	12.8346	6.04413	1.95811	7.34432	0.188659	1.53619	0.209167	1114.11	15.7175	1101.23	49.373	1076.78	144.234	1114.11	15.7175	-3.46676	13.936		1114.11	18.8547
17-16	462	428.945	7503.08	0.114128	12.6458	5.82293	2.04074	8.20871	0.188843	5.09224	0.620346	1115.1	52.144	1129.21	55.953	1157.28	127.707	1115.1	52.144	3.64477	11.5481		1115.1	52.9669
17-16	273	1016.85	20563	0.840729	10.2884	1.46297	2.53632	3.43593	0.190155	2.86633	0.834222	1122.22	29.5222	1282.52	25.0235	1562.94	35.5246	1122.22	29.5222	28.1982	2.49628		1122.22	31.2693
17-16	317	110.418	2012.95	0.475131	12.1552	9.95377	2.01224	12.4041	0.190505	2.24296	0.180824	1124.11	23.1374	1119.65	84.185	1111.84	243.846	1124.11	23.1374	-1.103	22.271		1124.11	25.3793
17-16	557	271.761	3978.35	0.412032	13.2677	4.2489	1.91785	8.23317	0.190784	1.27761	0.155178	1125.62	13.1955	1087.32	54.961	1012.24	164.934	1125.62	13.1955	-11.2007	18.1658		1125.62	16.8806
17-16	189	672.874	39169	0.287949	10.9839	4.94488	2.4332	14.7639	0.191379	13.906	0.941892	1128.84	144.007	1252.47	106.342	1472.55	94.1278	1128.84	144.007	23.341	10.9384		1128.84	142.796
17-16	529	210.812	3179.12	0.352835	12.5274	5.5808	2.01675	8.30348	0.191454	1.69104	0.203655	1129.25	17.517	1121.17	56.3786	1106.43	162.577	1129.25	17.517	-2.06192	15.0802		1129.25	20.4392
17-16	418	101.615	1351.99	0.701716	12.2401	8.81044	1.90519	18.284	0.191561	3.91439	0.214088	1129.83	40.5671	1082.9	121.895	990.582	363.919	1129.83	40.5671	-14.0567	42.1017		1129.83	41.7931
17-16	467	358.955	5270.74	0.320398	12.165	2.64371	2.14419	6.6587	0.19315	1.35207	0.203053	1138.42	14.1097	1163.18	46.1157	1210.43	128.336	1138.42	14.1097	5.94942	10.0396		1138.42	17.6675
17-16	11	151.461	7940.87	0.701983	12.9508	7.3001	2.02498	8.01751	0.193592	2.62517	0.327429	1140.8	27.4478	1123.93	54.5095	1092.32	151.773	1140.8	27.4478	-4.43861	14.7273		1140.8	29.3902
17-16	19	82.5932	5571.97	0.558986	11.1844	12.4568	2.33697	13.0031	0.1946	2.162	0.166268	1146.25	22.7037	1223.6	92.5293	1363.48	247.208	1146.25	22.7037	15.9325	15.3326		1146.25	25.067
17-16	102	41.1567	1646.37	0.44261	8.78273	20.0055	2.80524	21.4574	0.195087	3.82006	0.178029	1148.87	40.1992	1356.94	160.955	1702.61	389.947	1148.87	40.1992	32.5228	15.6336		1148.87	41.4811
17-16	282	212.085	12349.5	0.845111	12.5886	5.7546	2.34621	6.43706	0.217818	1.77426	0.275632	1270.34	20.4573	1226.41	45.8358	1150.84	122.876	1150.84	122.876	-10.3829	11.9189		1150.84	81.7203
17-16	599	145.292	2615.41	0.187089	11.8498	7.59094	2.15577	9.37137	0.195555	2.0026	0.213693	1151.4	21.116	1166.91	65.0247	1196.65	180.656	1151.4	21.116	3.78162	14.6327		1151.4	23.667
17-16	409	313.679	5550.47	0.354649	13.1848	3.87856	2.00695	7.40998	0.196043	1.55718	0.210147	1154.03	16.4537	1117.86	50.228	1049.11	146.068	1154.03	16.4537	-10.0009	15.3955		1154.03	19.6553
17-16	583	77.2697	1571.34	0.445756	11.587	9.15539	2.3983	10.5002	0.220466	2.3165	0.220615	1284.33	26.9753	1242.09	75.2779	1170.4	202.869	1170.4	202.869	-9.73512	19.16		1170.4	-1.8972
17-16	224	156.786	11219.9	0.427827	12.8015	6.70833	2.14497	7.5527	0.199618	1.90583	0.252338	1173.27	20.4437	1163.43	52.3158	1146.04	145.237	1173.27	20.4437	-2.37551	13.096		1173.27	23.1598
17-16	237	128.097	7754.25	0.103442	13.3522	7.07184	2.01439	7.79758	0.200017	2.0175	0.258734	1175.41	21.6776	1120.37	52.9215	1016	152.606	1175.41	21.6776	-15.6903	17.5075		1175.41	24.2582
17-16	578	531.371	7578.51	0.283349	11.1111	2.26593	2.46516	5.03022	0.200153	3.0961	0.615501	1176.14	33.2859	1261.88	36.34	1411.99	75.8605	1176.14	33.2859	16.7032	5.05813		1176.14	34.9599
17-16	270	963.332	48583.9	0.205127	9.74895	2.60185	2.83187	8.40854	0.200868	7.99257	0.950531	1179.98	86.1839	1364.02	63.1179	1666.14	48.3262	1179.98	86.1839	29.179	5.5656		1179.98	86.305
17-16	49	152.377	4730.49	0.415701	12.0094	9.31578	7.7419	34.7076	0.70674	33.0106	0.951107	3446.16	882.556	2201.48	314.594	1184.21	211.958	1184.21	211.958	-191.008	90.9243		1184.21	86.081
17-16	507	308.656	5472.67	0.485925	12.7019	4.63013	2.1598	8.00989	0.202802	5.52792	0.690137	1190.36	60.0844	1168.21	55.6057	1128.27	115.5	1190.36	60.0844	-5.50286	12.0418		1190.36	60.8159
17-16	118	159.321	9481.63	1.51311	12.3541	6.63061	2.27985	7.65135	0.207265	3.07531	0.40193	1214.23	34.0354	1206.07	54.016	1192.34	138.309	1192.34	138.309	-1.83563	12.1526		1192.34	101.7
17-16	485	118.775	2022.63	0.0689362	10.0499	12.3112	2.65618	14.9436	0.204457	3.8193	0.255581	1199.22	41.7941	1316.36	110.342	1513.38	273.025	1199.22	41.7941	20.7585	14.5601		1199.22	43.122
17-16	202	78.1565	1672.14	0.0946909	11.183	11.2941	2.33609	15.5576	0.208756	3.07059	0.197369	1222.19	34.1854	1223.33	110.727	1226.19	299.916	1226.19	299.916	0.326479	24.5382		1226.19	21.8319
17-16	119	155.98	8003.11	0.243374	12.0246	6.62199	2.43349	7.52393	0.215403	1.53484	0.203995	1257.54	17.5353	1252.55	54.1591	1244.83	144.28	1244.83	144.28	-1.02072	11.7931		1244.83	100.088
17-16	341	120.086	1711.09	1.26471	11.3135	8.82528	2.43419	13.2552	0.214538	3.4993	0.263993	1252.95	39.8468	1252.76	95.4702	1253.27	250.365	1253.27	250.365	0.025224	20.2234		1253.27	27.9724
17-16	397	141.261	2924.24	0.384383	11.574	6.34197	2.56243	12.7989	0.221713	1.91184	0.149375	1290.92	22.3662	1289.99	93.5439	1289.26	246.554	1289.26	246.554	-0.128889	19.2268		1289.26	63.9571
17-16	483	205.632	3804.54	0.275533	11.517	5.12064	2.70381	9.9706	0.232739	1.9594	0.196518	1348.84	23.8473	1329.51	73.9385	1299.32	190.116	1299.32	190.116	-3.81125	15.3001		1299.32	42.2411
17-16	456	118.618	944.876	0.397362	10.2565	6.54348	2.97959	31.6066	0.255794	1.76124	0.0557239	1468.28	23.1265	1402.43	241.415	1304.51	616.682	1304.51	616.682	-12.5547	53.2377		1304.51	-150.739
17-16	400	197.193	4969.2	0.301938	11.5265	3.49624	2.71686	7.57709	0.228509	1.71137	0.225861	1326.68	20.5204	1333.08	56.2516	1344.19	142.595	1344.19	142.595	1.30272	10.5808		1344.19	59.5739
17-16	67	58.7322	1657.15	0.512197	10.3882	9.22688	3.06732	17.8117	0.256081	2.44985	0.137542	1469.76	32.1972	1424.57	136.596	1358.48	340.681	1358.48	340.681	-8.1913	27.2356		1358.48	-25.4425
17-16	576	157.904	3282.02	1.05734	11.068	5.30554	2.64956	9.71404	0.220716	4.30625	0.443302	1285.66	50.1925	1314.52	71.638	1362.73	167.816	1362.73	167.816	5.65593	12.1881		1362.73	31.6284
17-16	468	61.8145	1220.33	0.212229	10.2227	14.4695	2.48324	16.213	0.204737	3.93868	0.242933	1200.72	43.1494	1267.16	117.494	1382.59	302.563	1382.59	302.563	13.1547	19.2596		1382.59	57.5396
17-16	433	666.077	13280.6	0.291137	11.4111	2.03165	2.49262	2.80147	0.205082	1.61372	0.576025	1202.56	17.7034	1269.89	20.3019	1386.6	43.9712	1386.6	43.9712	13.2724	3.03217		1386.6	57.3251
17-16	556	404.483	1689.09	0.32182	10.5482	2.77423	3.13637	16.53	0.25753	1.83821	0.111204	1477.19	24.2674	1441.66	127.433	1390.44	315.738	1390.44	315.738	-6.23944	24.1877		1390.44	-77.2249
17-16	357	118.287	1964.91	0.590504	10.5801	6.18856	3.0457	11.1811	0.247163	1.67827	0.150098	1423.83	21.4407	1419.16	85.5197	1412.97	211.642	1412.97	211.642	-0.768375	15.1697		1412.97	10.7727
17-16	522	106.33	2413.85	0.813703	10.6531	6.9658	3.14088	8.13739	0.253982	2.63109	0.323333	1458.98	34.3531	1442.77	62.6919	1419.76	147.231	1419.76	147.231	-2.76198	10.9277		1419.76	44.5173
17-16	231	609.455	35478.7	0.233236	11.1173	2.14785	2.57946	3.24814	0.207971	2.36926	0.72942	1218	26.2953	1294.83	23.7682	1425.38	42.4368	1425.38	42.4368	14.549	3.14254		1425.38	47.6918
17-16	47	108.1	7101.97	0.375565	10.6265	7.45459	3.18227	8.63678	0.253689	1.90422	0.220477	1457.47	24.8397	1452.86	66.7518	1446.94	160.488	1446.94	160.488	-0.72812	11.3034		1446.94	75.5107
17-16	245	630.777	29572.3	0.303203	10.8307	1.66996	2.6296	2.39684	0.207742	1.68792	0.704228	1216.78	18.7164	1308.95	17.6324	1464.15	32.3306	1464.15	32.3306	16.8951	2.23643		1464.15	28.9213
17-16	458	170.225	3879.81	0.951353	10.6414	5.89229	3.226	8.62649	0.254503	1.94024	0.224916	1461.66	25.3744	1463.43	66.8892	1466.8	159.702	1466.8	159.702	0.350758	10.9866		1466.8	70.4343
17-16	152	120.408	8902.66	0.114087	10.4756	7.8616	2.72099	9.02776	0.210521	3.84891	0.426341	1231.59	43.1499	1334.2	67.0558	1503.71	154.385	1503.71	154.385	18.0968	8.88508		1503.71	111.99
17-16	464	91.2345	3057.06	0.837544	10.2886	5.50371	3.61809	8.42353	0.279713	1.69771	0.201544	1589.91	23.9212	1553.52	67.0346	1505.17	155.954	1505.17	155.954	-5.62987	11.0593		1505.17	37.6272
17-16	375	114.685	2523.82	0.628231	10.2418	7.12271	3.35248	13.3498	0.256232	2.04202	0.152962	1470.54	26.8499	1493.37	104.5	1526.74	248.821	1526.74	248.821	3.68109	15.7958		1526.74	78.9125
17-16	520	570.392	8454.79	0.442869	10.5167	2.04785	2.7866	3.12441	0.21242	1.6842	0.539044	1241.7	19.0219	1351.95	23.3476	1531.71	49.5481	1531.71	49.5481	18.9341	2.90153		1531.71	46.4171
17-16	194	567.476	32525.5	0.481151	10.7254	2.98531	2.96725	5.77372	0.225303	4.90291	0.849178	1309.83	58.1163	1399.27	43.8548	1539.11	57.3542	1539.11	57.3542	14.897	4.93103		1539.11	106.739
17-16	300	372.538	21316	0.452021	10.3519	3.49373	2.7624	5.39073	0.208335	3.91384	0.726031	1219.94	43.5008	1345.44	40.1935	1551.83	69.6114	1551.83	69.6114	21.3868	4.50483		1551.83	60.8192
17-16	193	465.06	21624.6	1.00903	10.4665	2.19433	2.82365	3.27961	0.212223	2.3921	0.729385	1240.65	26.9965	1361.84	24.5927	1558.29	42.0935	1558.29	42.0935	20.3838	2.76164		1558.29	66.2754
17-16	309	112.374	2323.98	0.628402	9.95249	5.06471	3.92997	9.13054	0.291837	1.53953	0.168613	1650.7	22.4202	1619.87	73.9372	1580.85	168.434	1580.85	168.434	-4.41882	11.2155		1580.85	42.8534
17-16	257	510.692	31939.8	0.574619	10.0012	1.71403	3.24076	3.97066	0.235587	3.57602	0.90061	1363.72	43.954	1466.97	30.8127	1620.57	32.1153	1620.57	32.1153	15.8494	3.18393		1620.57	35.5419
17-16	310	705.656	11879	0.908638	10.0434	1.46963	3.42761	2.14928	0.24451	1.30705	0.608131	1410.1	16.5542	1510.75	16.8949	1655.62	31.6081	1655.62	31.6081	14.8295	1.90885		1655.62	74.9269
17-16	304	74.0873	2120.25	0.499275	9.5661	9.28111	3.9427	13.557	0.281145	2.37367	0.175088	1597.13	33.5792	1622.49	109.912	1656.34	247.531	1656.34	247.531	3.57497	14.5521		1656.34	116.658
17-16	66	772.716	36630.8	0.265475	9.39909	1.45811	3.63845	3.23587	0.251682	2.87413	0.888208	1447.15	37.255	1557.98	25.7744	1712.44	27.3436	1712.44	27.3436	15.4921	2.56005		1712.44	8.53745
17-16	4	127.064	7582.72	1.65345	9.35636	12.4014	3.00226	13.8819	0.207663	5.91457	0.426062	1216.36	65.563	1408.19	105.832	1712.55	231.22	1712.55	231.22	28.9741	10.3255		1712.55	183.757
17-16	259	671.108	12692.8	0.285958	9.41651	1.81299	3.21017	5.95555	0.221161	5.57238	0.935661	1288	65.0575	1459.62	46.1164	1719.88	38.6208	1719.88	38.6208	25.1109	4.13964		1719.88	24.5181
17-16	40	734.213	47318.5	0.125414	9.26732	2.58719	3.54105	9.65989	0.240475	9.30135	0.962883	1389.17	116.241	1536.44	76.5215	1746.24	47.7566	1746.24	47.7566	20.4484	7.00311		1746.24	33.5972
17-16	289	490.07	34380.6	0.351201	9.40005	2.39594	3.40851	9.10826	0.231407	8.77985	0.963943	1341.87	106.363	1506.36	71.5349	1746.78	44.3902	1746.78	44.3902	23.1804	6.39437		1746.78	57.2474
17-16	388	634.339	8990.27	0.281534	9.52898	2.64482	3.17054	4.66405	0.214992	2.50624	0.537353	1255.36	28.5884	1450.01	36.0064	1748.98	72.0225	1748.98	72.0225	28.2236	3.37759		1748.98	88.6525
17-16	541	55.3141	1036.67	0.400055	8.45097	9.06766	3.50207	19.2252	0.237399	9.02023	0.469187	1373.16	111.562	1527.68	152.134	1749.55	311.393	1749.55	311.393	21.5134	15.356		1749.55	-23.3284
17-16	228	1048.48	46907.7	0.277477	9.36789	1.4567	3.6993	2.3961	0.249759	1.89235	0.789765	1437.23	24.379	1571.22	19.1528	1756.93	26.8859	1756.93	26.8859	18.1965	1.86881		1756.93	46.8904
17-16	567	173.146	5457.86	0.622933	9.07475	3.9765	3.95493	5.43592	0.264244	2.28481	0.420317	1511.52	30.7853	1625	44.0628	1776.01	90.0146	1776.01	90.0146	14.8925	4.6488		1776.01	47.8393
17-16	387	501.234	10441.5	0.226986	9.42347	1.93905	3.35227	3.83749	0.222159	2.38564	0.621667	1293.27	27.955	1493.32	30.0145	1790.88	54.7483	1790.88	54.7483	27.7856	2.70376		1790.88	98.7811
17-16	191	873.396	9898.39	0.0228982	9.08831	1.37598	4.0743	2.00138	0.267458	1.4272	0.713106	1527.89	19.4145	1649.17	16.3172	1808.15	25.5002	1808.15	25.5002	15.4998	1.60407		1808.15	41.4596
17-16	585	375.087	6099.02	0.186304	9.0624	1.80779	5.58984	2.86466	0.366314	1.62111	0.565898	2012.03	28.0177	1914.53	24.6746	1811.28	42.9123	1811.28	42.9123	-11.0833	3.05268		1811.28	45.5012
17-16	392	1114.18	8447.62	0.100541	9.26237	1.4246	3.71278	3.64692	0.242238	2.89392	0.793524	1398.32	36.3784	1574.13	29.1748	1819.27	40.2825	1819.27	40.2825	23.1381	2.62582		1819.27	87.9711
17-16	219	751.793	49487.3	0.712142	9.07638	1.52229	3.8617	2.42713	0.251266	1.88459	0.776468	1445	24.3961	1605.72	19.5762	1824.23	27.7432	1824.23	27.7432	20.7883	1.79991		1824.23	57.1489
17-16	440	571.025	12147.3	0.120481	8.92621	2.18476	3.42669	10.4163	0.220046	10.0758	0.967316	1282.12	117.152	1510.54	81.9168	1848.07	47.7757	1848.07	47.7757	30.624	6.58795		1848.07	60.3939
17-16	233	554.348	44073.9	0.174407	8.78241	3.35714	4.11364	7.51379	0.261302	6.7118	0.893264	1496.5	89.6371	1657.02	61.3928	1867.72	60.9499	1867.72	60.9499	19.8756	5.46533		1867.72	69.3645
17-16	558	378.119	9336.31	0.584942	8.74835	2.35968	4.36202	5.40722	0.27674	4.60418	0.851486	1574.92	64.3343	1705.17	44.6718	1869.93	51.1487	1869.93	51.1487	15.7765	4.14056		1869.93	48.3845
17-16	211	288.663	23261.4	0.78937	8.75961	62.4915	4.69103	88.3293	0.296875	62.4235	0.706714	1675.8	922.748	1765.64	774.814	1874.41	1157	1874.41	1157	10.596	73.9522		1874.41	938.709
17-16	201	191.384	6826.89	0.64373	8.64527	4.31395	3.86585	5.62403	0.243952	3.20107	0.569178	1407.21	40.4684	1606.58	45.377	1879.58	83.3314	1879.58	83.3314	25.1319	3.95642		1879.58	68.5368
17-16	251	22.8518	2416.13	0.556306	8.04333	14.5198	6.25824	18.8691	0.380455	10.8841	0.57682	2078.41	193.385	2012.63	165.562	1946.56	275.948	1946.56	275.948	-6.77365	18.1056		1946.56	171.924
17-16	374	382.466	9947.85	0.20009	8.30026	1.96111	4.98317	2.72702	0.294576	1.52836	0.560451	1664.36	22.4189	1816.47	23.0628	1996.46	40.1377	1996.46	40.1377	16.6347	2.01742		1996.46	73.9913
17-16	182	331.491	18435.3	0.47373	7.99745	5.88634	4.37623	13.2213	0.2503	11.7996	0.892473	1440.02	152.284	1707.86	109.382	2054.9	105.308	2054.9	105.308	29.9225	8.23508		2054.9	129.519
17-16	61	1124.03	73296.3	0.29086	7.4228	1.78286	4.96533	2.6107	0.272451	1.90529	0.7298	1553.23	26.2983	1813.44	22.0657	2127.84	31.2522	2127.84	31.2522	27.0043	1.63612		2127.84	4.82363
17-16	495	1185.53	7978.08	0.0494329	6.68815	1.84905	5.13743	5.76906	0.249073	5.45019	0.944729	1433.69	70.0605	1842.32	49.0432	2342.04	32.3553	2342.04	32.3553	38.7844	3.10868		2342.04	39.1886
17-16	168	574.328	52684.4	0.262074	6.58785	5.12916	5.69183	16.1018	0.272442	15.2607	0.947762	1553.19	210.653	1930.13	139.281	2363.91	87.6787	2363.91	87.6787	34.2957	9.23845		2363.91	85.7449
17-16	91	780.918	19237.9	1.05103	6.53909	1.74034	5.78351	4.78524	0.275985	4.45106	0.930165	1571.11	62.0619	1943.94	41.4315	2369.12	29.9685	2369.12	29.9685	33.6839	2.75065		2369.12	26.1316
17-16	204	188.785	5280.82	0.699607	6.40272	5.77476	6.53363	14.0534	0.305461	12.4658	0.88703	1718.33	188.044	2050.44	123.908	2403.99	110.324	2403.99	110.324	28.5217	8.48213		2403.99	87.0937
17-16	39	684.675	41918.4	0.36579	6.36528	1.51037	6.42048	3.03598	0.299263	2.62799	0.865615	1687.65	39.021	2035.07	26.674	2409.14	25.8282	2409.14	25.8282	29.9477	1.78536		2409.14	17.1086
17-16	190	430.068	31706.3	0.157283	6.36581	1.39609	6.69742	5.85311	0.304887	5.66553	0.967951	1715.5	85.3358	2072.28	51.7217	2449.17	24.8737	2449.17	24.8737	29.9559	3.55615		2449.17	55.8199
17-16	482	658.323	14957.8	0.298976	6.18263	3.29891	6.01069	15.128	0.266385	14.7588	0.975596	1522.43	200.147	1977.39	131.882	2494.43	55.9455	2494.43	55.9455	38.967	8.13966		2494.43	78.986
17-16	449	418.557	17862.7	1.31289	6.10649	1.44041	7.59956	3.48481	0.331221	3.0625	0.878812	1844.3	49.1206	2184.81	31.272	2522.53	27.9267	2522.53	27.9267	26.8872	2.1088		2522.53	59.2318
17-16	410	439.481	9638.01	0.336743	6.01411	1.71723	7.12365	2.42656	0.309132	1.54051	0.634853	1736.43	23.45	2127	21.6067	2529.83	31.4709	2529.83	31.4709	31.3617	1.26027		2529.83	44.4243
17-16	196	140.387	12996.3	0.281575	5.66204	3.12898	9.16106	4.96269	0.370207	3.84656	0.775095	2030.37	66.9965	2354.23	45.4387	2648.72	52.028	2648.72	52.028	23.3451	2.94364		2648.72	82.4808
17-16	379	412.399	11171.4	0.439692	5.75721	1.56758	10.3932	5.45744	0.418259	5.14366	0.942504	2252.57	97.7886	2470.44	50.5606	2655.6	30.2387	2655.6	30.2387	15.1764	3.80693		2655.6	94.8949
17-16	176	229.183	15234.4	0.42109	5.56665	2.31665	7.88506	6.1608	0.317313	5.68747	0.923171	1776.59	88.3167	2217.97	55.529	2655.65	39.2649	2655.65	39.2649	33.1014	3.46959		2655.65	49.0643
17-16	197	305.402	22422	0.797946	5.64145	2.43552	8.19946	10.4821	0.329384	10.1893	0.972058	1835.4	162.755	2253.28	94.9334	2658.58	40.7863	2658.58	40.7863	30.9632	6.21285		2658.58	75.9668
17-16	90	410.433	38760.5	0.128946	5.48503	3.19927	8.71302	13.9689	0.347838	13.5965	0.973337	1924.27	226.219	2308.44	127.402	2668.91	53.0642	2668.91	53.0642	27.9005	8.59646		2668.91	50.7467
17-16	248	306.095	33997.2	0.312909	5.45932	1.5093	10.7932	3.9003	0.428456	3.59418	0.921514	2298.76	69.4963	2505.48	36.2487	2678.26	25.0567	2678.26	25.0567	14.1697	2.71624		2678.26	28.2962
17-16	56	534.959	6750.57	0.627472	5.28807	1.67381	8.12733	6.86857	0.320373	6.65507	0.968916	1791.55	104.097	2245.29	62.1207	2689.86	28.0803	2689.86	28.0803	33.3961	3.93196		2689.86	-10.7305
17-16	480	315.936	5221.07	0.18287	5.4485	1.7016	8.65139	4.45661	0.340521	3.80206	0.853127	1889.18	62.2603	2301.98	40.5685	2692.33	38.4164	2692.33	38.4164	29.8311	2.51995		2692.33	41.5673
17-16	163	178.616	13788.2	0.49749	5.33033	3.91419	8.66431	14.5273	0.335826	13.9718	0.961761	1866.56	226.453	2303.34	132.432	2717.71	65.5902	2717.71	65.5902	31.3189	8.49577		2717.71	62.8526
17-16	463	535.843	10072.3	0.293251	5.34198	4.08638	7.81366	17.376	0.300987	16.8765	0.971253	1696.2	251.727	2209.78	156.725	2727.9	68.1294	2727.9	68.1294	37.8203	9.35763		2727.9	79.2862
17-16	333	124.907	4882.36	0.172735	5.17405	2.38195	11.7441	8.77099	0.436333	8.23728	0.93915	2334.2	161.32	2584.22	82.1156	2787.25	49.3501	2787.25	49.3501	16.2542	5.97469		2787.25	60.4606
17-16	160	187.815	22964.2	0.0517651	4.98971	1.76515	10.9455	2.31882	0.401102	1.43907	0.620603	2174.11	26.5574	2518.51	21.5747	2809.78	29.7244	2809.78	29.7244	22.6233	1.25036		2809.78	14.9213
17-16	594	238.618	11371.3	0.558897	4.18825	3.83606	15.4956	11.2453	0.465358	10.5643	0.939447	2463.17	216.294	2846.22	107.36	3130.58	61.2847	3130.58	61.2847	21.319	7.07867		3130.58	81.8531
Sample 17-18			(Analyzed July_24_2020; 600/hr; 30 µm spot)
			Systematic errors (2σ): 206Pb/238U=	1.09972
			206Pb/207Pb=	0.998513
17-18	339	569.64	19328.5	0.202077	17.912	4.39837	0.557897	4.74358	0.0725081	1.7765	0.374506	451.249	7.74229	450.156	17.2489	445.528	97.7814	451.249	7.74229	-1.28401	22.2969		451.249	9.20075
17-18	94	819.074	33046.8	0.368749	17.8533	2.83384	0.569145	3.0622	0.0737274	1.16036	0.37893	458.573	5.13624	457.462	11.2779	452.829	62.9586	458.573	5.13624	-1.26852	14.1254		458.573	7.20683
17-18	67	490.742	16156.6	0.246475	17.6386	4.2958	0.579589	4.73404	0.0741775	1.98927	0.420207	461.275	8.85542	464.197	17.638	479.621	94.9808	461.275	8.85542	3.82505	19.1351		461.275	10.2059
17-18	279	800.647	53647.5	0.194334	17.8046	3.07911	0.579308	3.43104	0.0748391	1.51363	0.441159	465.244	6.79398	464.017	12.7792	458.891	68.3012	465.244	6.79398	-1.3846	15.1625		465.244	8.50892
17-18	323	908.83	32101.2	0.66852	17.5608	2.18562	0.592333	2.6625	0.0754742	1.52051	0.571085	469.052	6.87872	472.356	10.0567	489.407	48.2271	469.052	6.87872	4.15907	9.54836		469.052	8.60085
17-18	49	519.048	22114.4	0.698729	17.8784	4.38154	0.588363	6.1933	0.0763242	4.3771	0.706748	474.145	20.009	469.822	23.2952	449.705	97.3359	474.145	20.009	-5.4347	23.2504		474.145	20.6472
17-18	25	1111.16	45005.3	0.203878	17.7961	1.86783	0.591471	2.34635	0.076374	1.42005	0.605218	474.443	6.49539	471.806	8.85442	459.989	41.4179	474.443	6.49539	-3.14233	9.39378		474.443	8.33383
17-18	534	981.009	38913	0.898844	17.9829	2.09834	0.586535	2.97642	0.0765317	2.11093	0.709218	475.388	9.67401	468.653	11.1731	436.745	46.7358	475.388	9.67401	-8.84773	11.8564		475.388	10.9926
17-18	594	717.829	30100.6	0.31215	17.8532	3.34084	0.591317	3.61313	0.0765994	1.37604	0.380845	475.793	6.31133	471.709	13.6327	452.833	74.2089	475.793	6.31133	-5.0702	17.2749		475.793	8.20061
17-18	556	1342.54	21890.3	0.714291	17.3651	2.13109	0.616927	2.60402	0.0777319	1.49645	0.574669	482.57	6.95774	487.92	10.0884	514.076	46.7761	482.57	6.95774	6.12862	8.64798		482.57	8.75035
17-18	273	480.897	22098	0.289915	18.1098	3.62499	0.598732	3.89593	0.0786743	1.42747	0.366402	488.205	6.71165	476.428	14.8151	421.072	80.9292	488.205	6.71165	-15.9432	22.341		488.205	8.59354
17-18	105	881.707	38978.9	1.29101	17.5954	3.01937	0.625231	3.34827	0.079823	1.44717	0.432215	495.066	6.89626	493.121	13.0792	485.08	66.6648	495.066	6.89626	-2.05872	14.0979		495.066	8.78302
17-18	490	516.195	20285.7	0.34884	17.6933	4.22182	0.621962	4.58906	0.0798472	1.79881	0.391977	495.211	8.57434	491.076	17.8685	472.814	93.4148	495.211	8.57434	-4.73692	20.7724		495.211	10.1519
17-18	331	925.374	37144.8	0.537265	17.6762	1.97136	0.622837	2.46788	0.0798827	1.48465	0.601588	495.422	7.07974	491.624	9.61737	474.923	43.5987	495.422	7.07974	-4.31645	9.69176		495.422	8.92981
17-18	526	524.858	26921.5	0.485799	17.9539	3.95922	0.613819	4.34736	0.0799625	1.79558	0.413027	495.899	8.57038	485.966	16.79	440.34	88.1373	495.899	8.57038	-12.6171	22.625		495.899	10.1525
17-18	22	575.253	31904	0.75794	17.6813	3.07668	0.624574	3.31109	0.0801281	1.22367	0.369568	496.887	5.85184	492.71	12.9256	474.325	68.0802	496.887	5.85184	-4.75668	15.0863		496.887	8.00394
17-18	99	510.981	32196.4	0.451508	17.4088	4.43798	0.635242	4.59296	0.0802408	1.18305	0.257578	497.56	5.66493	499.356	18.1172	508.53	97.5847	497.56	5.66493	2.15721	18.8086		497.56	7.87352
17-18	513	538.1	26111.2	0.533157	17.4407	2.74595	0.634755	3.19491	0.0803262	1.63317	0.511178	498.069	7.82801	499.054	12.5964	504.519	60.4382	498.069	7.82801	1.27845	11.9276		498.069	9.54873
17-18	73	403.79	16447.2	0.681293	17.8005	4.08608	0.624076	4.335	0.080604	1.44783	0.333985	499.727	6.96185	492.399	16.9145	459.426	90.6258	499.727	6.96185	-8.77215	21.5097		499.727	8.86495
17-18	71	273.592	13634.6	0.44114	17.0558	5.28106	0.654717	5.48335	0.0810239	1.47566	0.269116	502.231	7.12987	511.378	22.0304	553.437	115.253	502.231	7.12987	9.25234	18.942		502.231	9.01342
17-18	191	315.142	18878.9	0.433616	17.358	5.53848	0.643428	5.7756	0.081038	1.63796	0.283599	502.316	7.91532	504.427	22.9612	514.947	121.659	502.316	7.91532	2.45291	23.0972		502.316	9.64588
17-18	364	1232.05	65212.6	0.741733	17.3412	1.6665	0.646146	2.06526	0.0813013	1.21987	0.59066	503.886	5.91264	506.104	8.23131	517.077	36.6223	503.886	5.91264	2.5512	6.99596		503.886	8.09881
17-18	435	1207.72	49926.5	0.936123	17.5917	2.3293	0.64089	2.82311	0.0818049	1.59509	0.565012	506.887	7.77561	502.857	11.1961	485.525	51.4451	506.887	7.77561	-4.39974	11.1773		506.887	9.55987
17-18	448	611.51	26673.3	0.423235	17.3767	2.99054	0.648949	3.27035	0.0818212	1.32358	0.404722	506.984	6.45326	507.832	13.0687	512.603	65.7372	506.984	6.45326	1.09611	12.746		506.984	8.52212
17-18	397	235.096	14966.6	0.654576	17.236	5.90698	0.654349	6.02602	0.0818342	1.19185	0.197784	507.061	5.81185	511.151	24.2027	530.462	129.422	507.061	5.81185	4.41132	23.3474		507.061	8.04884
17-18	349	571.959	29175.7	0.704052	17.5371	2.96843	0.644608	3.32544	0.0820239	1.49898	0.450763	508.192	7.32519	505.155	13.2348	492.366	65.4402	508.192	7.32519	-3.21441	13.7986		508.192	9.2064
17-18	126	357.417	13763.7	0.527753	17.227	5.23236	0.657865	5.42457	0.0822306	1.43121	0.263839	509.423	7.01029	513.308	21.8575	531.616	114.619	509.423	7.01029	4.17468	20.7025		509.423	8.96651
17-18	584	609.432	39500.6	0.910281	17.6237	3.14768	0.643901	3.49828	0.0823387	1.52647	0.436348	510.067	7.48595	504.718	13.9135	481.489	69.5395	510.067	7.48595	-5.93528	15.3786		510.067	9.34639
17-18	400	1731.75	72920.7	0.813725	17.5512	1.40266	0.649576	1.81021	0.0827229	1.14429	0.632131	512.355	5.63589	508.218	7.238	490.594	30.9401	512.355	5.63589	-4.43564	6.68584		512.355	7.96234
17-18	563	650.361	29942.1	0.39574	17.1232	2.9019	0.666237	3.33019	0.0827756	1.63375	0.490587	512.669	8.05133	518.422	13.5206	544.79	63.4017	512.669	8.05133	5.89609	11.0509		512.669	9.81978
17-18	518	661.044	22932.8	0.605105	17.8179	3.03986	0.642242	3.46974	0.0830315	1.67284	0.482121	514.192	8.26748	503.693	13.7783	457.229	67.4377	514.192	8.26748	-12.4582	16.685		514.192	10.0064
17-18	179	609.437	25198.7	0.573907	17.6838	2.78639	0.64718	3.08466	0.0830402	1.3233	0.428996	514.244	6.54066	506.742	12.3063	473.965	61.6692	514.244	6.54066	-8.4983	14.1844		514.244	8.63823
17-18	432	853.916	38996.7	0.387757	17.4772	2.87556	0.65503	3.21947	0.0830654	1.4478	0.449702	514.394	7.15802	511.57	12.9382	499.947	63.3255	514.394	7.15802	-2.88974	13.1109		514.394	9.11463
17-18	307	267.485	15408	0.445958	17.496	4.93851	0.664793	5.11103	0.0843942	1.31672	0.257624	522.298	6.60599	517.541	20.7243	497.554	108.852	522.298	6.60599	-4.97307	23.0038		522.298	8.74311
17-18	463	596.772	29051.9	0.431152	17.5056	3.10596	0.664891	3.41774	0.0844528	1.42616	0.417281	522.646	7.15959	517.601	13.8592	496.348	68.485	522.646	7.15959	-5.29845	14.6003		522.646	9.17
17-18	524	340.019	18029.8	0.543609	17.4298	4.41883	0.668417	4.89593	0.0845335	2.10808	0.430579	523.126	10.5923	519.749	19.9169	505.875	97.1784	523.126	10.5923	-3.41004	19.975		523.126	12.0388
17-18	393	569.409	25021.5	0.55917	16.9837	3.88911	0.686863	4.15273	0.0846428	1.45603	0.35062	523.776	7.32473	530.914	17.1698	562.642	84.7415	523.776	7.32473	6.90787	14.0812		523.776	9.30657
17-18	358	499.277	24782	0.41056	17.9363	3.46405	0.650501	3.95408	0.0846579	1.90659	0.482184	523.865	9.59293	508.787	15.824	442.522	77.046	523.865	9.59293	-18.3818	20.7247		523.865	11.176
17-18	140	168.971	11178.3	0.48313	18.1856	3.65386	0.643013	4.0473	0.0848469	1.74067	0.430083	524.989	8.77613	504.17	16.0836	411.733	81.7057	524.989	8.77613	-27.5072	25.3926		524.989	10.4916
17-18	496	598.124	6331.13	0.950752	17.2218	4.12758	0.679059	4.38006	0.0848544	1.46561	0.33461	525.033	7.38992	526.206	17.9872	532.271	90.3695	525.033	7.38992	1.35977	16.8047		525.033	9.36598
17-18	510	673.196	35164.6	0.34674	17.4122	2.80701	0.678729	3.24974	0.0857509	1.63751	0.503891	530.358	8.33703	526.006	13.3414	508.139	61.7313	530.358	8.33703	-4.37265	12.7854		530.358	10.1603
17-18	248	416.773	19253.2	0.496406	17.6532	4.15403	0.6697	4.39208	0.0857812	1.42631	0.324746	530.538	7.2641	520.53	17.8876	477.79	91.8339	530.538	7.2641	-11.0401	21.3966		530.538	9.30336
17-18	367	1132.03	45699.5	0.466716	17.5169	2.15399	0.675383	3.23801	0.085841	2.41766	0.746648	530.893	12.3209	523.98	13.2541	494.905	47.475	530.893	12.3209	-7.27168	10.5872		530.893	13.6149
17-18	43	1647.98	89584.8	0.57409	17.3162	1.48808	0.700328	2.24473	0.0879916	1.6806	0.748688	543.648	8.76189	538.987	9.38783	520.252	32.6684	543.648	8.76189	-4.49699	6.77441		543.648	10.5888
17-18	573	623.198	31072.5	0.428167	17.6812	2.84648	0.688071	3.25656	0.0882738	1.58201	0.48579	545.32	8.27218	531.641	13.4784	474.337	62.9855	545.32	8.27218	-14.9647	15.365		545.32	10.1985
17-18	577	1140.2	69847	0.483981	17.2913	2.26313	0.710275	2.72791	0.0891132	1.52306	0.558325	550.29	8.03348	544.909	11.5034	523.401	49.6803	550.29	8.03348	-5.13739	10.0968		550.29	10.0375
17-18	363	741.118	42074.8	0.321229	17.433	3.0888	0.713976	3.4019	0.0903119	1.42557	0.41905	557.381	7.61203	547.105	14.3893	505.511	67.919	557.381	7.61203	-10.2609	14.8907		557.381	9.7506
17-18	233	719.098	44446.3	0.54837	17.4097	2.17158	0.725838	2.68752	0.0916892	1.58335	0.589149	565.52	8.57262	554.108	11.4769	508.461	47.7519	565.52	8.57262	-11.2217	10.5805		565.52	10.5655
17-18	200	1122.55	61169	0.753213	17.0727	1.76592	0.760118	2.43776	0.0941611	1.68054	0.689377	580.099	9.323	574.078	10.6897	551.25	38.523	580.099	9.323	-5.2334	7.54599		580.099	11.2664
17-18	300	1019.89	58657.4	0.446295	16.6894	1.46106	0.783344	1.91324	0.0948593	1.23524	0.645624	584.212	6.89906	587.389	8.53337	600.61	31.5888	584.212	6.89906	2.73033	5.24322		584.212	9.3942
17-18	566	386.081	20202.7	0.638497	17.4778	3.71244	0.756684	4.08659	0.0959597	1.7082	0.418002	590.687	9.64165	572.095	17.874	499.869	81.7959	590.687	9.64165	-18.1685	19.4324		590.687	11.5918
17-18	489	306.259	13973.6	0.626545	17.2777	4.70439	0.784995	5.04644	0.0984102	1.82626	0.361891	605.085	10.5477	588.329	22.5353	525.131	103.206	605.085	10.5477	-15.2256	22.7347		605.085	12.4324
17-18	260	321.999	19889.7	0.131717	14.3867	2.89794	1.36861	3.5144	0.142866	1.98819	0.565728	860.846	16.0217	875.566	20.6196	913.851	59.6279	860.846	16.0217	5.80012	6.39161		860.846	18.4558
17-18	371	1428.48	149924	0.0451058	13.6966	1.4424	1.49373	4.84071	0.148447	4.62082	0.954574	892.255	38.5035	927.835	29.4436	1014.23	29.2294	892.255	38.5035	12.0261	4.56511		892.255	39.5431
17-18	528	441.73	42045.3	0.200834	13.7912	2.67912	1.4861	3.95962	0.148709	2.91563	0.736341	893.724	24.3321	924.724	24.0344	1000.27	54.3706	893.724	24.3321	10.6516	5.43177		893.724	26.0834
17-18	596	305.77	23507.4	0.411842	14.7324	2.75165	1.44931	3.11725	0.154926	1.46481	0.469905	928.518	12.6669	909.587	18.7297	864.832	57.0749	928.518	12.6669	-7.36396	7.23532		928.518	16.049
17-18	341	1113.62	114331	0.0773304	13.4481	1.82355	1.5962	3.36451	0.155753	2.82746	0.84038	933.131	24.5633	968.726	21.0047	1051.27	36.786	933.131	24.5633	11.238	3.88668		933.131	26.4414
17-18	107	326.676	43955.2	0.389668	13.7118	2.13984	1.57608	2.95489	0.156805	2.03777	0.689624	938.999	17.8063	960.826	18.357	1011.98	43.3411	938.999	17.8063	7.2121	4.34602		938.999	20.3856
17-18	208	668.837	74028.1	0.100223	14.1336	1.48668	1.56429	2.15853	0.16042	1.56494	0.725003	959.109	13.9463	956.166	13.3704	950.311	30.4232	959.109	13.9463	-0.925766	3.5487		959.109	17.2491
17-18	356	501.15	36987.8	0.314806	13.8824	2.43982	1.59449	2.85386	0.160611	1.48047	0.518761	960.17	13.2071	968.057	17.8092	986.887	49.61	960.17	13.2071	2.70717	5.07062		960.17	16.6658
17-18	221	403.926	34763.1	0.163984	13.4477	2.48989	1.65897	3.26487	0.161873	2.11182	0.646832	967.176	18.9667	992.981	20.684	1051.33	50.2144	967.176	18.9667	8.00449	4.7499		967.176	21.5322
17-18	7	581.148	51648	0.0957862	13.7818	1.85924	1.63571	2.42395	0.163568	1.55522	0.641609	976.576	14.0935	984.06	15.2746	1001.66	37.7108	976.576	14.0935	2.50378	3.93102		976.576	17.4688
17-18	219	239.512	25453.8	0.284693	14.1119	2.3993	1.60161	5.38512	0.163995	4.82108	0.895261	978.939	43.7869	970.838	33.6651	953.442	49.0646	978.939	43.7869	-2.6743	7.0006		978.939	44.845
17-18	232	441.62	41944.4	0.303248	14.1834	2.37776	1.59919	2.79044	0.164576	1.46041	0.523362	982.158	13.3043	969.894	17.4331	943.121	48.7129	982.158	13.3043	-4.13915	5.56077		982.158	16.8748
17-18	56	486.894	41859.7	0.284685	14.1715	1.98287	1.60084	2.53339	0.164608	1.57679	0.622405	982.335	14.367	970.536	15.8334	944.791	40.6131	982.335	14.367	-3.9738	4.72105		982.335	17.7223
17-18	16	852.566	88526	0.528936	13.964	1.42263	1.62705	1.92552	0.164854	1.29759	0.673891	983.696	11.8382	980.721	12.1092	974.954	28.9635	983.696	11.8382	-0.896659	3.234		983.696	15.7591
17-18	509	543.956	50565.1	0.317377	13.6895	1.6396	1.66176	2.18662	0.165061	1.44672	0.661627	984.842	13.213	994.048	13.8614	1015.28	33.2224	984.842	13.213	2.9979	3.43058		984.842	16.8194
17-18	455	999.991	104745	0.180409	13.2924	1.55199	1.71196	2.497	0.165114	1.9561	0.783381	985.135	17.87	1013.02	16.0054	1074.7	31.1285	985.135	17.87	8.33372	3.13281		985.135	20.6658
17-18	483	759.971	67235.4	0.213654	13.8679	1.3979	1.64132	1.85397	0.165155	1.21782	0.656869	985.36	11.1278	986.221	11.698	989.021	28.4384	985.36	11.1278	0.370145	3.07779		985.36	15.2457
17-18	267	2204.15	208239	0.118537	13.7834	1.24463	1.65146	1.87091	0.165163	1.39685	0.746619	985.403	12.7642	990.111	11.8323	1001.43	25.248	985.403	12.7642	1.59995	2.78914		985.403	16.4741
17-18	45	184.932	19825.2	0.328005	14.2191	4.49697	1.60167	7.83948	0.165246	6.42142	0.819113	985.867	58.7039	970.861	49.0142	937.924	92.1887	985.867	58.7039	-5.11166	12.0794		985.867	59.3527
17-18	109	356.821	39186.3	0.286415	13.8163	2.253	1.66396	2.68177	0.16681	1.45461	0.542407	994.511	13.4057	994.885	17.0089	996.578	45.763	994.511	13.4057	0.207317	4.77585		994.511	17.0289
17-18	98	486.809	48272.6	0.404632	13.6309	1.50928	1.69668	1.94882	0.167807	1.23287	0.632625	1000.02	11.4202	1007.28	12.4502	1023.98	30.5396	1000.02	11.4202	2.34003	3.11888		1000.02	15.5568
17-18	320	1681.39	186463	0.137587	13.8678	1.24689	1.67016	1.83307	0.168056	1.34365	0.733008	1001.39	12.4622	997.248	11.6422	989.028	25.3257	1001.39	12.4622	-1.25013	2.88265		1001.39	16.343
17-18	88	1674.96	117505	0.031156	13.3103	1.55303	1.74055	2.14413	0.168098	1.47831	0.689466	1001.63	13.7141	1023.67	13.8273	1071.99	31.1629	1001.63	13.7141	6.56409	3.00239		1001.63	17.3142
17-18	82	545.181	49160.1	0.466854	13.8637	2.07959	1.67239	2.46692	0.168231	1.32703	0.537929	1002.36	12.319	998.096	15.6759	989.61	42.2864	1002.36	12.319	-1.28824	4.50355		1002.36	16.2406
17-18	340	257.767	26692.3	0.186876	13.8585	3.79012	1.67421	4.17045	0.16835	1.74	0.417222	1003.01	16.1625	998.784	26.5125	990.418	77.0877	1003.01	16.1625	-1.27166	8.04948		1003.01	19.3108
17-18	561	222.996	16461.9	0.538357	13.7287	3.21417	1.70046	3.84683	0.169388	2.11357	0.549433	1008.74	19.7361	1008.7	24.597	1009.49	65.1673	1008.74	19.7361	0.0740181	6.74047		1008.74	22.4
17-18	2	648.086	83992.2	0.0863677	13.3594	1.73262	1.75363	2.59976	0.169985	1.93824	0.745547	1012.03	18.1534	1028.5	16.8114	1064.6	34.8337	1012.03	18.1534	4.9377	3.54719		1012.03	21.0423
17-18	352	142.513	16323.3	0.267937	14.0079	3.75892	1.67609	4.48296	0.170356	2.44285	0.544919	1014.07	22.9222	999.499	28.5115	968.551	76.7076	1014.07	22.9222	-4.69997	8.62318		1014.07	25.2592
17-18	533	267.878	24701.7	0.341022	13.9907	2.61395	1.67822	2.88497	0.170364	1.22078	0.423153	1014.11	11.4555	1000.31	18.3563	971.069	53.323	1014.11	11.4555	-4.43282	5.85466		1014.11	15.6763
17-18	258	1102.8	92506.8	0.183868	13.4768	1.33695	1.74223	1.81349	0.170365	1.22528	0.675646	1014.12	11.4977	1024.29	11.6991	1046.98	26.9962	1014.12	11.4977	3.13867	2.72833		1014.12	15.7071
17-18	547	237.627	23527.2	0.226863	13.7847	2.94388	1.70757	3.34725	0.17079	1.59301	0.475916	1016.46	14.9803	1011.37	21.4355	1001.24	59.7704	1016.46	14.9803	-1.52062	6.24239		1016.46	18.4133
17-18	68	467.13	59114.2	0.120002	12.3796	2.71023	1.90728	10.6172	0.17132	10.2655	0.96687	1019.38	96.7917	1083.63	70.7528	1216.07	53.3076	1019.38	96.7917	16.174	8.76669		1019.38	96.6601
17-18	402	382.822	44339	0.422044	13.1469	2.0441	1.80455	2.89817	0.172139	2.05451	0.7089	1023.89	19.4504	1047.11	18.9353	1096.72	40.9123	1023.89	19.4504	6.64101	3.90824		1023.89	22.2213
17-18	301	268.06	33387	0.224406	13.6695	2.37255	1.73625	2.709	0.172208	1.30757	0.482674	1024.26	12.3831	1022.07	17.4545	1018.25	48.0123	1024.26	12.3831	-0.591018	4.8965		1024.26	16.4288
17-18	476	214.042	37383.3	0.197814	13.839	4.22227	1.71673	4.42401	0.172383	1.32072	0.298536	1025.23	12.5186	1014.8	28.3877	993.274	85.8132	1025.23	12.5186	-3.21679	9.00597		1025.23	16.5369
17-18	188	301.762	32657.2	0.251497	13.7348	2.43471	1.73074	2.81917	0.172481	1.42123	0.504131	1025.76	13.4778	1020.03	18.1432	1008.59	49.3616	1025.76	13.4778	-1.70275	5.15371		1025.76	17.2748
17-18	108	435.969	35155.1	0.198461	13.7316	2.39992	1.73305	2.80256	0.172671	1.44731	0.516425	1026.81	13.738	1020.88	18.0451	1009.06	48.6729	1026.81	13.738	-1.75975	5.09381		1026.81	17.4841
17-18	535	490.364	44134.8	0.260834	13.4526	1.71259	1.77099	2.09554	0.172865	1.2076	0.576274	1027.88	11.4737	1034.88	13.5992	1050.6	34.5528	1027.88	11.4737	2.16292	3.398		1027.88	15.7814
17-18	281	178.587	18007.5	0.452896	13.7587	3.61402	1.74274	3.89288	0.17398	1.44685	0.371666	1034	13.8223	1024.48	25.1172	1005.05	73.343	1034	13.8223	-2.8801	7.63252		1034	17.5934
17-18	482	438.658	50676.4	0.16976	13.3547	2.13338	1.80111	2.53309	0.174527	1.36574	0.53916	1037.01	13.0824	1045.86	16.5387	1065.3	42.9343	1037.01	13.0824	2.65605	4.11091		1037.01	17.0393
17-18	544	218.386	25798.7	0.284363	13.4831	3.18355	1.78466	3.42745	0.174595	1.26979	0.370478	1037.38	12.1674	1039.88	22.3049	1046.03	64.2408	1037.38	12.1674	0.826772	6.2007		1037.38	16.3525
17-18	103	213.366	19450.3	0.229978	14.1459	2.93949	1.7017	3.30814	0.174663	1.51763	0.458755	1037.75	14.5469	1009.17	21.1581	948.536	60.1326	1037.75	14.5469	-9.4058	7.10333		1037.75	18.1878
17-18	52	231.542	26176	0.510298	13.8965	3.42145	1.73569	3.9928	0.175011	2.05819	0.515475	1039.66	19.7619	1021.87	25.7239	984.805	69.6508	1039.66	19.7619	-5.57056	7.73149		1039.66	22.567
17-18	503	435.476	31469.3	0.219961	13.4035	2.01983	1.80142	2.40388	0.175194	1.30343	0.54222	1040.67	12.5261	1045.97	15.6959	1057.96	40.6789	1040.67	12.5261	1.63492	3.96314		1040.67	16.6412
17-18	214	826.092	97649.8	0.188098	13.4913	1.44635	1.79523	1.98756	0.175736	1.36326	0.685898	1043.64	13.1356	1043.73	12.9616	1044.77	29.2139	1043.64	13.1356	0.107979	3.06312		1043.64	17.1214
17-18	550	168.565	17350.8	0.14959	12.8015	2.84028	1.89323	4.04223	0.175854	2.87618	0.711533	1044.28	27.7289	1078.72	26.8594	1149.81	56.4443	1044.28	27.7289	9.17793	5.06889		1044.28	29.7708
17-18	531	599.808	102742	0.0755394	13.7187	1.54134	1.76764	1.99225	0.175953	1.26227	0.633591	1044.83	12.1753	1033.66	12.9201	1010.96	31.2449	1044.83	12.1753	-3.35012	3.41366		1044.83	16.4068
17-18	505	587.472	65307.4	0.00606507	13.3116	1.85381	1.82287	2.40686	0.176065	1.53505	0.637781	1045.44	14.8144	1053.72	15.7818	1071.8	37.2044	1045.44	14.8144	2.45949	3.65708		1045.44	18.446
17-18	91	395.413	36137.1	0.109159	13.3596	2.23188	1.81697	2.76843	0.176128	1.63797	0.59166	1045.79	15.8124	1051.59	18.1318	1064.56	44.9032	1045.79	15.8124	1.76371	4.40177		1045.79	19.2552
17-18	231	1223.44	134646	0.186344	13.4492	1.20891	1.80691	1.79579	0.176328	1.32792	0.739465	1046.89	12.8317	1047.96	11.7381	1051.1	24.4002	1046.89	12.8317	0.401459	2.61456		1046.89	16.9108
17-18	466	1837.52	217645	0.30496	13.1787	1.12744	1.85444	1.70506	0.177327	1.27911	0.750185	1052.36	12.4195	1065.01	11.2478	1091.88	22.552	1052.36	12.4195	3.61996	2.2927		1052.36	16.6367
17-18	34	1491.71	201191	0.212979	13.5549	1.10827	1.81043	1.68719	0.17806	1.27214	0.754001	1056.37	12.3952	1049.23	11.0359	1035.27	22.4249	1056.37	12.3952	-2.0379	2.51369		1056.37	16.6445
17-18	355	505.383	68186.2	0.270394	12.9842	1.60639	1.89286	4.97111	0.178329	4.70441	0.94635	1057.84	45.8967	1078.59	33.0303	1121.63	32.0392	1057.84	45.8967	5.68745	4.89916		1057.84	47.0605
17-18	42	279.8	35913.4	0.346086	13.5622	2.73953	1.81399	3.05011	0.178507	1.34096	0.439642	1058.81	13.0935	1050.52	19.9651	1034.18	55.3881	1058.81	13.0935	-2.38136	5.62754		1058.81	17.1842
17-18	173	739.079	56839.4	0.213393	13.6583	1.54073	1.80495	2.12824	0.178875	1.46819	0.68986	1060.83	14.3609	1047.25	13.9059	1019.91	31.1949	1060.83	14.3609	-4.01207	3.479		1060.83	18.1765
17-18	312	1028.43	120758	0.143546	13.4006	1.37999	1.84771	1.96953	0.179657	1.40523	0.713486	1065.1	13.7961	1062.61	12.9759	1058.4	27.8183	1065.1	13.7961	-0.632705	2.94871		1065.1	17.7615
17-18	69	560.184	49231.6	0.066603	13.4583	1.76373	1.841	2.20736	0.179777	1.32728	0.601299	1065.76	13.0381	1060.22	14.5242	1049.74	35.5883	1065.76	13.0381	-1.52593	3.65918		1065.76	17.186
17-18	423	159.197	21476.7	0.307814	13.4852	3.80203	1.83842	4.77359	0.179883	2.88648	0.604677	1066.34	28.3687	1059.3	31.3963	1045.72	76.7236	1066.34	28.3687	-1.97176	7.95826		1066.34	30.4413
17-18	130	399.54	33078.2	0.247678	13.6718	2.02099	1.81359	2.44936	0.17991	1.38382	0.564972	1066.48	13.602	1050.37	16.0313	1017.9	40.9342	1066.48	13.602	-4.77279	4.4202		1066.48	17.6203
17-18	123	848.173	76683.1	0.0808065	13.2687	1.3401	1.87528	1.86472	0.180543	1.29666	0.695365	1069.94	12.7833	1072.4	12.3491	1078.28	26.8582	1069.94	12.7833	0.773726	2.74118		1069.94	17.021
17-18	368	283.857	39614.7	0.244292	13.443	2.62831	1.85141	2.95216	0.180588	1.34433	0.455373	1070.18	13.2561	1063.93	19.4637	1052.03	52.9992	1070.18	13.2561	-1.7252	5.27732		1070.18	17.3789
17-18	174	401.527	29931.8	0.161677	13.7391	1.68381	1.81757	2.2141	0.181192	1.43772	0.649347	1073.48	14.2171	1051.81	14.5028	1007.95	34.1162	1073.48	14.2171	-6.50207	3.87093		1073.48	18.1394
17-18	229	371.645	42146	0.320416	13.2854	1.87868	1.88115	2.31623	0.181337	1.35481	0.584918	1074.27	13.4063	1074.47	15.356	1075.76	37.7199	1074.27	13.4063	0.138049	3.71667		1074.27	17.5187
17-18	427	164.165	9496.54	0.330107	12.3688	3.7336	2.0223	4.26644	0.181494	2.06464	0.483926	1075.13	20.4454	1123.03	28.989	1217.74	73.383	1075.13	20.4454	11.711	5.57906		1075.13	23.329
17-18	195	290.184	34068.7	0.263054	13.6885	2.45106	1.82784	2.79784	0.181544	1.34914	0.482209	1075.41	13.3631	1055.5	18.3632	1015.43	49.624	1075.41	13.3631	-5.90645	5.34034		1075.41	17.493
17-18	269	171.983	30149.4	0.476499	13.3661	3.28026	1.87604	3.59117	0.181943	1.46164	0.40701	1077.58	14.5044	1072.67	23.7866	1063.58	65.9837	1077.58	14.5044	-1.31644	6.43183		1077.58	18.3889
17-18	186	278.213	24217.4	0.443478	13.4674	2.83021	1.86285	3.10868	0.182032	1.28599	0.413678	1078.07	12.7666	1068	20.5399	1048.39	57.0961	1078.07	12.7666	-2.83087	5.73113		1078.07	17.0605
17-18	433	378.134	35946.5	0.12251	13.0717	2.75476	1.91937	5.23428	0.182044	4.45073	0.850304	1078.13	44.187	1087.85	34.9461	1108.2	55.0237	1078.13	44.187	2.71332	6.26347		1078.13	45.461
17-18	521	759.972	93254.6	0.196586	12.1646	1.71289	2.07139	3.88031	0.18283	3.48179	0.897296	1082.41	34.6933	1139.39	26.5735	1250.44	33.5237	1082.41	34.6933	13.437	3.61713		1082.41	36.413
17-18	28	134.533	10608.1	0.529245	13.6432	4.50716	1.84774	4.70586	0.182913	1.353	0.287514	1082.87	13.4868	1062.62	31.0058	1022.15	91.2471	1082.87	13.4868	-5.9404	9.54889		1082.87	17.6336
17-18	150	1059.28	95081.3	0.389374	12.9741	1.41692	1.95896	1.98804	0.184413	1.3945	0.701447	1091.04	13.9968	1101.53	13.3643	1123.19	28.285	1091.04	13.9968	2.86199	2.74534		1091.04	18.0748
17-18	240	376.204	30787.9	0.371182	13.1925	1.80109	1.92848	2.34389	0.184599	1.49996	0.639946	1092.05	15.0681	1091.01	15.6729	1089.81	36.0481	1092.05	15.0681	-0.205868	3.59137		1092.05	18.919
17-18	343	491.652	41015.9	0.212385	13.1817	1.85912	1.94841	2.80237	0.186355	2.0969	0.748257	1101.6	21.2335	1097.9	18.8045	1091.43	37.2014	1101.6	21.2335	-0.931148	3.95221		1101.6	24.1398
17-18	361	165	16304.2	0.43911	13.7435	3.93865	1.87396	4.40735	0.186874	1.97781	0.448753	1104.42	20.0746	1071.93	29.1821	1007.3	79.9169	1104.42	20.0746	-9.6416	8.92412		1104.42	23.1462
17-18	243	470.597	49370.5	0.434584	12.2006	2.00607	2.12239	3.01604	0.187886	2.25215	0.746725	1109.91	22.9634	1156.11	20.8171	1244.62	39.3097	1109.91	22.9634	10.8229	3.36705		1109.91	25.702
17-18	481	350.991	57073	0.275282	13.1526	1.95006	1.97081	2.64689	0.18808	1.78977	0.676179	1110.97	18.2647	1105.58	17.8298	1095.86	38.9993	1110.97	18.2647	-1.3783	3.97421		1110.97	21.6374
17-18	185	342.29	42898	0.355967	13.2285	1.88047	1.97218	2.34236	0.189297	1.39659	0.596233	1117.57	14.3298	1106.05	15.782	1084.37	37.7005	1117.57	14.3298	-3.06152	3.81908		1117.57	18.4932
17-18	287	348.428	26903.7	0.387771	13.3517	2.18751	1.95894	2.76641	0.189778	1.69346	0.61215	1120.17	17.413	1101.52	18.597	1065.75	44.0262	1120.17	17.413	-5.10696	4.63923		1120.17	20.9763
17-18	391	353.452	31611.9	0.340609	12.9649	2.16989	2.01897	2.71958	0.189926	1.63942	0.60282	1120.98	16.8684	1121.91	18.4678	1124.61	43.239	1120.98	16.8684	0.323296	4.11544		1120.98	20.533
17-18	480	567.888	78230.3	0.309024	12.8582	1.39224	2.03833	1.9627	0.19017	1.38342	0.704858	1122.3	14.2497	1128.4	13.3699	1141.05	27.6837	1122.3	14.2497	1.64343	2.69332		1122.3	18.4604
17-18	357	359.145	36178.8	0.280585	12.9956	2.01207	2.01787	2.48841	0.190273	1.46416	0.588392	1122.85	15.0882	1121.54	16.8948	1119.89	40.1305	1122.85	15.0882	-0.264255	3.83719		1122.85	19.1155
17-18	20	233.166	22564.9	0.298465	12.5528	3.50276	2.08911	4.70897	0.190279	3.14723	0.668348	1122.89	32.4332	1145.23	32.3385	1188.68	69.1721	1122.89	32.4332	5.5352	6.13702		1122.89	34.4152
17-18	291	759.643	86179.5	0.280829	12.868	1.28232	2.03891	1.89245	0.190369	1.39177	0.735434	1123.37	14.3483	1128.6	12.8926	1139.51	25.5033	1123.37	14.3483	1.41598	2.54042		1123.37	18.5428
17-18	488	502.418	48427.4	0.165714	12.7435	1.48947	2.05939	2.12015	0.190421	1.50882	0.711655	1123.66	15.5585	1135.42	14.4913	1158.82	29.5761	1123.66	15.5585	3.03428	2.81556		1123.66	19.4919
17-18	172	340.329	29576	0.454473	13.4023	1.73432	1.96356	2.11781	0.190947	1.21543	0.573909	1126.5	12.5623	1103.1	14.248	1058.14	34.95	1126.5	12.5623	-6.46019	3.71134		1126.5	17.2243
17-18	296	516.878	83395.7	0.576708	12.8185	1.78918	2.05647	2.11798	0.19127	1.13344	0.535152	1128.25	11.7315	1134.45	14.4698	1147.17	35.5098	1128.25	11.7315	1.64878	3.21157		1128.25	16.6424
17-18	55	828.937	85578.9	0.322094	12.4536	1.60507	2.11756	2.52008	0.191346	1.94282	0.770935	1128.66	20.1156	1154.54	17.381	1204.29	31.6241	1128.66	20.1156	6.28018	2.97433		1128.66	23.2985
17-18	412	798.964	108134	0.357848	12.6459	1.57642	2.09472	2.23243	0.192204	1.58072	0.70807	1133.31	16.428	1147.08	15.3434	1174.09	31.2303	1133.31	16.428	3.47332	2.92408		1133.31	20.2435
17-18	210	140.03	12658.7	0.386859	12.949	3.14251	2.05427	3.40994	0.19301	1.32373	0.388199	1137.66	13.8056	1133.72	23.2887	1127.02	62.6206	1137.66	13.8056	-0.944189	5.74096		1137.66	18.217
17-18	228	214.463	29687.6	0.172695	13.027	2.62504	2.04676	3.60096	0.193464	2.46497	0.684531	1140.11	25.7585	1131.22	24.564	1115.03	52.3905	1140.11	25.7585	-2.2491	5.33078		1140.11	28.3324
17-18	540	260.505	25053.7	0.0318077	12.8306	2.27905	2.07884	2.71736	0.193532	1.47984	0.54459	1140.48	15.4687	1141.85	18.6304	1145.33	45.2913	1140.48	15.4687	0.423619	4.16285		1140.48	19.5185
17-18	347	414.567	36204.7	0.10169	12.6534	1.7641	2.1129	2.44442	0.193988	1.69208	0.692221	1142.94	17.722	1153.02	16.8473	1172.91	34.924	1142.94	17.722	2.55518	3.27131		1142.94	21.3534
17-18	89	770.716	49981.8	0.284346	12.2981	1.67847	2.17915	2.55612	0.194453	1.92781	0.754196	1145.45	20.2315	1174.41	17.7909	1229	32.9395	1145.45	20.2315	6.79847	2.99161		1145.45	23.4795
17-18	592	191.291	20267.5	0.200363	12.6571	3.28482	2.11809	3.55903	0.194521	1.36991	0.384911	1145.82	14.3808	1154.71	24.5493	1172.33	65.0168	1145.82	14.3808	2.26077	5.55766		1145.82	18.7046
17-18	574	186.043	18595.9	0.31355	12.815	3.30922	2.09748	3.73427	0.195031	1.73027	0.46335	1148.57	18.2036	1147.98	25.6772	1147.74	65.7771	1148.57	18.2036	-0.0724686	5.95044		1148.57	21.7823
17-18	588	184.386	18300.9	0.508595	12.5805	3.30286	2.13664	3.57704	0.195037	1.37344	0.383959	1148.61	14.4499	1160.74	24.7424	1184.33	65.2835	1148.61	14.4499	3.0168	5.48342		1148.61	18.7745
17-18	215	513.419	54965	0.477164	12.8517	1.7222	2.09191	2.2471	0.195069	1.44342	0.64235	1148.78	15.1883	1146.15	15.4375	1142.03	34.2209	1148.78	15.1883	-0.590633	3.29455		1148.78	19.3471
17-18	203	651.587	68721.4	0.250154	12.7147	1.50271	2.11454	2.03246	0.195078	1.36848	0.673313	1148.83	14.4002	1153.56	14.0114	1163.3	29.8198	1148.83	14.4002	1.24462	2.81792		1148.83	18.7379
17-18	157	207.756	24333.6	0.280775	12.8251	3.36551	2.10153	3.65204	0.195562	1.418	0.388276	1151.44	14.9523	1149.31	25.1273	1146.17	66.9115	1151.44	14.9523	-0.459255	6.00796		1151.44	19.1791
17-18	104	366.842	38521	0.180948	12.9163	2.24877	2.09029	2.61309	0.195898	1.3309	0.509319	1153.25	14.054	1145.62	17.9475	1132.05	44.7756	1153.25	14.054	-1.8722	4.21622		1153.25	18.5017
17-18	275	271.32	24033.1	0.506692	12.6665	2.87823	2.13251	3.19682	0.19599	1.39119	0.435179	1153.74	14.6964	1159.4	22.0985	1170.86	56.9848	1153.74	14.6964	1.4619	4.9573		1153.74	18.9952
17-18	9	277.817	30907.5	0.800184	12.8215	1.9777	2.10771	2.46074	0.196083	1.46423	0.595036	1154.24	15.4741	1151.33	16.9464	1146.72	39.2941	1154.24	15.4741	-0.655877	3.7037		1154.24	19.6033
17-18	313	844.425	92829.8	0.164445	12.7774	1.45928	2.11787	2.02512	0.19635	1.40414	0.693363	1155.68	14.856	1154.64	13.9678	1153.54	28.9506	1155.68	14.856	-0.185438	2.825		1155.68	19.13
17-18	297	189.264	14145.4	0.529447	12.5984	3.45727	2.16032	3.70636	0.197479	1.3358	0.360407	1161.76	14.2008	1168.37	25.7269	1181.52	68.3797	1161.76	14.2008	1.67211	5.8162		1161.76	18.6656
17-18	142	374.805	56003.4	0.137107	12.6771	1.67765	2.14832	2.35286	0.197609	1.64968	0.701137	1162.46	17.5473	1164.51	16.3026	1169.17	33.2568	1162.46	17.5473	0.573435	3.20173		1162.46	21.3147
17-18	406	415.186	58906.2	0.350509	12.7525	1.93627	2.13924	2.47697	0.197945	1.54475	0.623642	1164.27	16.4544	1161.58	17.1395	1157.41	38.4092	1164.27	16.4544	-0.592859	3.62834		1164.27	20.4391
17-18	81	126.856	16989.1	0.330765	12.5837	4.29658	2.18	4.57161	0.199046	1.56176	0.341621	1170.19	16.7128	1174.68	31.8247	1183.83	84.8722	1170.19	16.7128	1.15164	7.226		1170.19	20.6799
17-18	326	213.958	30495.7	0.433948	12.9042	2.46245	2.12866	2.8681	0.199308	1.47048	0.512703	1171.6	15.7533	1158.15	19.8146	1133.92	49.0172	1171.6	15.7533	-3.32335	4.67756		1171.6	19.9244
17-18	475	380.764	37509	0.362338	12.6408	2.22832	2.1742	2.57772	0.199418	1.29585	0.502711	1172.19	13.8888	1172.83	17.9285	1174.88	44.1282	1172.19	13.8888	0.228687	3.92944		1172.19	18.4959
17-18	460	766.507	138453	0.262941	12.5459	1.37547	2.1955	2.01887	0.199859	1.47781	0.731998	1174.56	15.8683	1179.62	14.0845	1189.77	27.1175	1174.56	15.8683	1.27814	2.61567		1174.56	20.0322
17-18	63	587.253	84091.6	0.383334	12.7401	1.35084	2.17174	1.84728	0.200756	1.26003	0.682099	1179.38	13.5804	1172.04	12.8434	1159.34	26.7894	1179.38	13.5804	-1.72835	2.62637		1179.38	18.3122
17-18	498	377.207	64138.3	0.375195	12.53	1.86941	2.21934	2.31574	0.201774	1.36674	0.590195	1184.84	14.7927	1187.16	16.2101	1192.27	36.8919	1184.84	14.7927	0.623288	3.31584		1184.84	19.2578
17-18	322	1016.84	69183.4	0.0218213	13.111	1.41922	2.12522	2.08512	0.202175	1.52759	0.732615	1186.99	16.5609	1157.03	14.3976	1102.23	28.382	1186.99	16.5609	-7.6897	3.15385		1186.99	20.6531
17-18	384	430.147	44660.5	0.42585	12.4328	2.0245	2.24751	2.53002	0.202749	1.51737	0.599745	1190.07	16.4889	1196.01	17.7793	1207.63	39.8303	1190.07	16.4889	1.45365	3.52543		1190.07	20.6133
17-18	6	485.231	59649.7	0.206799	11.8417	1.90971	2.35994	3.0768	0.20277	2.41241	0.784064	1190.18	26.2175	1230.57	21.944	1302.85	37.0985	1190.18	26.2175	8.6478	3.28875		1190.18	28.9481
17-18	166	193.153	25359.3	0.306665	12.9585	3.02396	2.15817	4.06197	0.202922	2.71207	0.667672	1191	29.4925	1167.68	28.1868	1125.55	60.2303	1191	29.4925	-5.8152	6.23927		1191	31.9272
17-18	167	169.434	27371.9	0.464922	12.7282	2.57077	2.19792	2.96841	0.202986	1.48411	0.499967	1191.34	16.1432	1180.38	20.7163	1161.2	51.0039	1191.34	16.1432	-2.59615	4.71596		1191.34	20.3464
17-18	184	314.516	35672.1	0.444465	12.8443	1.6375	2.18096	2.1598	0.203256	1.4083	0.652051	1192.79	15.3355	1174.98	15.0363	1143.18	32.5511	1192.79	15.3355	-4.33979	3.25982		1192.79	19.7234
17-18	437	472.173	55693.3	0.310521	12.7184	1.80264	2.2064	2.39788	0.203613	1.58124	0.659433	1194.7	17.2439	1183.07	16.7546	1162.72	35.7673	1194.7	17.2439	-2.75014	3.4914		1194.7	21.2448
17-18	176	563.942	65916.5	0.167346	12.7673	1.46734	2.2041	1.96436	0.204182	1.30601	0.664849	1197.75	14.2754	1182.34	13.7209	1155.11	29.098	1197.75	14.2754	-3.69126	2.88966		1197.75	18.9455
17-18	403	322.26	34714.7	0.297715	12.4101	2.00361	2.34341	2.48219	0.211014	1.46521	0.59029	1234.22	16.4582	1225.56	17.6659	1211.19	39.4677	1211.19	39.4677	-1.90137	3.58783		1211.19	44.8092
17-18	506	201.535	38071.6	0.274508	12.3264	2.51894	2.36441	2.90158	0.211469	1.44017	0.496341	1236.64	16.2057	1231.92	20.7059	1224.49	49.4678	1224.49	49.4678	-0.992016	4.28922		1224.49	53.4547
17-18	404	178.796	18740.6	0.36376	12.3002	3.3807	2.38651	4.33274	0.212993	2.70989	0.625444	1244.74	30.6745	1238.56	31.0054	1228.67	66.3756	1228.67	66.3756	-1.30825	6.01545		1228.67	68.5532
17-18	252	409.889	54793.2	0.116276	12.289	1.7321	2.36632	2.18891	0.210999	1.33835	0.611421	1234.14	15.0322	1232.49	15.6238	1230.5	33.9851	1230.5	33.9851	-0.295769	3.02749		1230.5	40.2361
17-18	238	351.263	69007	0.193217	12.1983	1.54941	2.4163	2.19356	0.213865	1.55275	0.707867	1249.38	17.6356	1247.46	15.7537	1244.98	30.3114	1244.98	30.3114	-0.353047	2.82422		1244.98	37.3323
17-18	24	748.84	87437.8	0.0308077	12.0941	1.30386	2.33612	1.78418	0.205001	1.21789	0.682604	1202.13	13.3566	1223.34	12.6861	1261.78	25.4753	1261.78	25.4753	4.72699	2.19559		1261.78	33.5849
17-18	196	372.155	47000.4	0.513567	12.0281	1.7131	2.41078	2.26309	0.210399	1.47881	0.653447	1230.94	16.5709	1245.81	16.2422	1272.47	33.3855	1272.47	33.3855	3.26373	2.85264		1272.47	39.7111
17-18	40	149.008	23931.5	0.352878	11.8608	3.78994	2.69694	3.9672	0.232099	1.17261	0.295576	1345.49	14.2397	1327.62	29.3882	1299.73	73.6253	1299.73	73.6253	-3.52128	5.96562		1299.73	75.0978
17-18	439	604.957	66860.1	0.50255	11.7772	1.55854	2.45129	2.15654	0.20947	1.49051	0.691157	1226	16.6411	1257.8	15.5528	1313.47	30.2305	1313.47	30.2305	6.65977	2.49406		1313.47	37.1132
17-18	272	316.022	38015.4	0.457341	11.7694	2.07675	2.55058	2.50818	0.217811	1.40644	0.560742	1270.3	16.2159	1286.6	18.2953	1314.75	40.277	1314.75	40.277	3.38135	3.20657		1314.75	45.359
17-18	244	232.778	24618.4	0.270815	11.7551	2.52948	2.73945	3.02665	0.233657	1.66204	0.549134	1353.64	20.2929	1339.23	22.5147	1317.1	49.0386	1317.1	49.0386	-2.77422	4.12506		1317.1	52.9442
17-18	515	222.184	26569.8	0.502769	11.7385	2.82608	2.67499	3.22001	0.227835	1.54329	0.479281	1323.14	18.4606	1321.57	23.7998	1319.85	54.7703	1319.85	54.7703	-0.24955	4.38893		1319.85	58.0146
17-18	102	377.738	56803.4	0.350039	11.7307	1.75945	2.66243	2.32518	0.226615	1.52013	0.653767	1316.74	18.1042	1318.1	17.1635	1321.13	34.0925	1321.13	34.0925	0.332953	2.91425		1321.13	40.1927
17-18	74	218.436	48054.3	0.587763	11.729	2.13396	2.69927	2.63403	0.229717	1.54413	0.586222	1333.02	18.5947	1328.26	19.5162	1321.42	41.3453	1321.42	41.3453	-0.87768	3.45579		1321.42	46.2606
17-18	293	310.464	37969	0.236229	11.6619	1.61974	2.75122	2.15694	0.232799	1.42437	0.660367	1349.15	17.3392	1342.42	16.0631	1332.52	31.3361	1332.52	31.3361	-1.24792	2.71335		1332.52	37.9507
17-18	444	130.757	22887.4	0.387017	11.654	3.61737	2.91768	3.94328	0.246717	1.56974	0.398079	1421.52	20.0252	1386.51	29.8214	1333.84	69.9735	1333.84	69.9735	-6.57424	5.78899		1333.84	71.7071
17-18	201	444.038	63067.5	0.26052	11.5988	1.70816	2.61664	2.31245	0.220215	1.55873	0.674058	1283.01	18.1342	1305.32	16.9884	1343	32.997	1343	32.997	4.46693	2.70788		1343	39.268
17-18	72	287.298	34547	0.335684	11.5975	1.73954	2.77831	2.2196	0.233795	1.37863	0.621115	1354.36	16.8406	1349.73	16.5728	1343.22	33.6021	1343.22	33.6021	-0.82916	2.81676		1343.22	39.7584
17-18	493	173.524	31892.8	0.270395	11.5948	2.60674	2.79468	3.02345	0.235116	1.53171	0.506609	1361.26	18.7961	1354.12	22.6104	1343.68	50.3513	1343.68	50.3513	-1.3079	4.0458		1343.68	54.0627
17-18	560	197.858	43105.1	0.295369	11.5874	2.58097	2.79174	2.9124	0.234719	1.34931	0.463299	1359.18	16.5352	1353.33	21.7738	1344.91	49.8452	1344.91	49.8452	-1.06099	3.94215		1344.91	53.6144
17-18	315	650.114	50438.7	0.240858	11.5848	1.57407	2.74048	2.13688	0.230357	1.44519	0.676307	1336.37	17.4427	1339.51	15.8971	1345.35	30.3947	1345.35	30.3947	0.667509	2.59176		1345.35	37.1844
17-18	580	241.752	37899.7	0.41063	11.5253	1.85859	2.88455	2.40067	0.241223	1.51949	0.632944	1393.05	19.0364	1377.88	18.1013	1355.27	35.8428	1355.27	35.8428	-2.7876	3.05986		1355.27	41.5749
17-18	414	229.567	28408.6	0.29777	11.5145	1.93683	2.77905	2.78085	0.232183	1.99544	0.717566	1345.93	24.2389	1349.92	20.7652	1357.08	37.3424	1357.08	37.3424	0.821451	3.2616		1357.08	42.8199
17-18	446	194.618	32436.3	0.362677	11.5125	2.71172	2.59293	3.04823	0.216595	1.39223	0.456735	1263.86	15.9784	1298.64	22.3377	1357.42	52.2786	1357.42	52.2786	6.89259	3.77413		1357.42	55.7542
17-18	75	173.465	18585.5	0.299316	11.5011	2.83938	2.82057	3.18187	0.235378	1.43605	0.451323	1362.62	17.6382	1361.02	23.8529	1359.32	54.7255	1359.32	54.7255	-0.242619	4.23917		1359.32	57.9296
17-18	440	111.159	11711	0.383196	11.4969	5.08891	2.59107	5.28707	0.216147	1.43388	0.271205	1261.48	16.4283	1298.12	38.7394	1360.03	98.083	1360.03	98.083	7.2458	6.79747		1360.03	97.3634
17-18	501	159.052	16740.4	0.915129	11.4844	2.55208	2.72913	3.01987	0.227415	1.61446	0.534612	1320.94	19.2829	1336.42	22.4415	1362.13	49.1696	1362.13	49.1696	3.02407	3.77601		1362.13	52.9991
17-18	30	435.455	60049.6	0.318256	11.4781	1.39584	2.88662	1.86659	0.240407	1.23926	0.663919	1388.81	15.4833	1378.42	14.0768	1363.19	26.8882	1363.19	26.8882	-1.87997	2.30831		1363.19	34.4436
17-18	223	474.417	12913	0.444413	11.4744	2.46517	2.97811	3.13789	0.247946	1.94145	0.618714	1427.87	24.8661	1402.05	23.8534	1363.81	47.4844	1363.81	47.4844	-4.69702	4.07582		1363.81	51.5165
17-18	64	207.469	36588.8	0.469324	11.4311	2.36666	2.91091	2.75489	0.241437	1.41008	0.511846	1394.16	17.6783	1384.75	20.8209	1371.09	45.5391	1371.09	45.5391	-1.68286	3.61503		1371.09	49.8072
17-18	418	567.125	65612.9	0.212925	11.3973	1.66864	2.72111	2.90946	0.225029	2.3834	0.81919	1308.39	28.2232	1334.24	21.6039	1376.78	32.0832	1376.78	32.0832	4.96717	3.01771		1376.78	38.4712
17-18	562	157.057	17030.6	0.329545	11.3936	2.76732	2.77752	3.06877	0.229619	1.32637	0.432215	1332.5	15.9668	1349.51	22.912	1377.4	53.2028	1377.4	53.2028	3.25997	3.9123		1377.4	56.5506
17-18	164	239.948	38286.7	0.301965	11.3617	1.98171	2.9065	3.01439	0.239609	2.27143	0.753528	1384.66	28.3033	1383.6	22.7736	1382.79	38.0712	1382.79	38.0712	-0.135608	3.4337		1382.79	43.3911
17-18	309	273.958	28675.2	0.252411	11.3608	2.21064	2.86123	2.59629	0.235857	1.36154	0.524419	1365.12	16.7506	1371.77	19.5355	1382.95	42.4682	1382.95	42.4682	1.28871	3.2643		1382.95	47.1327
17-18	378	348.37	43821.8	0.310432	11.3264	1.70544	2.92116	2.2089	0.240068	1.40382	0.635529	1387.05	17.5194	1387.41	16.7092	1388.77	32.7343	1388.77	32.7343	0.123468	2.67086		1388.77	38.9779
17-18	344	396.319	41795.3	0.223102	11.3074	1.66929	2.84271	2.28288	0.233228	1.55725	0.682141	1351.4	18.9851	1366.89	17.1482	1392	32.0263	1392	32.0263	2.91687	2.61711		1392	38.4019
17-18	288	764.273	123265	0.0860257	11.2409	1.21415	3.11982	1.82717	0.25446	1.36542	0.747289	1461.43	17.8545	1437.59	14.0497	1403.3	23.2582	1403.3	23.2582	-4.1427	2.14431		1403.3	31.699
17-18	27	129.821	17000.7	0.40149	11.238	3.47126	3.04677	3.70867	0.248438	1.30558	0.352036	1430.42	16.7484	1419.42	28.3536	1403.79	66.4952	1403.79	66.4952	-1.89677	4.97195		1403.79	68.4836
17-18	516	172.823	23714.3	1.06568	11.2111	2.66065	2.679	3.21091	0.217927	1.79747	0.5598	1270.91	20.7333	1322.68	23.7422	1408.37	50.9338	1408.37	50.9338	9.76027	3.58019		1408.37	54.501
17-18	245	74.2327	9423.28	0.479125	11.1967	5.66853	3.08202	5.93654	0.250387	1.76359	0.297074	1440.47	22.7658	1428.23	45.5194	1410.85	108.497	1410.85	108.497	-2.09953	8.01578		1410.85	106.837
17-18	409	267.35	52013.5	0.202755	11.0573	1.78671	3.14846	2.31062	0.252601	1.46513	0.634087	1451.88	19.0466	1444.62	17.8066	1434.77	34.0807	1434.77	34.0807	-1.19216	2.74587		1434.77	39.9977
17-18	38	168.101	6017.25	0.40797	11.0467	3.47528	3.18998	3.6695	0.255688	1.17802	0.321029	1467.74	15.4632	1454.74	28.3688	1436.6	66.2764	1436.6	66.2764	-2.16773	4.83476		1436.6	68.2512
17-18	274	715.709	55995.9	0.0899407	11.0203	1.38124	3.2131	2.1727	0.256925	1.67715	0.771916	1474.09	22.0997	1460.32	16.8253	1441.16	26.3235	1441.16	26.3235	-2.2848	2.41702		1441.16	33.8693
17-18	579	170.583	19838.5	0.24473	11.0055	2.42165	3.15855	2.94461	0.252222	1.67521	0.568906	1449.93	21.7515	1447.09	22.7102	1443.74	46.1367	1443.74	46.1367	-0.428677	3.54538		1443.74	50.2342
17-18	467	279.863	47150.7	0.284605	10.9332	1.62339	3.16969	2.06922	0.25145	1.28307	0.620074	1445.95	16.619	1449.81	15.972	1456.28	30.8755	1456.28	30.8755	0.709447	2.39455		1456.28	37.3712
17-18	59	241.525	29204.6	0.249723	10.9274	2.477	3.2673	2.98695	0.259055	1.66924	0.558843	1485.01	22.1403	1473.3	23.2227	1457.29	47.105	1457.29	47.105	-1.9019	3.62735		1457.29	51.0642
17-18	80	280.194	33379.8	0.455177	10.8953	1.88501	3.20083	2.30582	0.253041	1.32799	0.575928	1454.14	17.2877	1457.36	17.84	1462.87	35.8197	1462.87	35.8197	0.59664	2.7057		1462.87	41.3878
17-18	236	294.359	49222.4	0.253183	10.884	1.64176	3.24828	2.11585	0.256525	1.33471	0.630815	1472.04	17.5657	1468.77	16.4272	1464.85	31.1889	1464.85	31.1889	-0.491067	2.45274		1464.85	37.6065
17-18	151	554.859	89742.8	0.00922974	10.8838	1.83878	3.08332	4.8055	0.243493	4.43978	0.923897	1404.83	56.0435	1428.55	36.8486	1464.89	34.9317	1464.89	34.9317	4.09982	4.45716		1464.89	40.6492
17-18	383	223.651	25999.8	0.319431	10.7994	2.8864	3.05903	5.77755	0.239701	5.00488	0.866263	1385.14	62.3832	1422.49	44.2185	1479.66	54.7266	1479.66	54.7266	6.38811	5.45551		1479.66	57.7912
17-18	155	125.225	13850.5	0.300408	10.7987	3.26682	3.29529	3.62378	0.258197	1.56832	0.432787	1480.61	20.7471	1479.94	28.2306	1479.78	61.9394	1479.78	61.9394	-0.0559836	4.4165		1479.78	64.278
17-18	86	69.5875	13078.1	0.644907	10.781	5.37184	3.269	5.64264	0.255718	1.72705	0.306071	1467.9	22.6722	1473.71	43.8802	1482.89	101.817	1482.89	101.817	1.01121	6.96652		1482.89	100.68
17-18	317	144.718	27233	0.748798	10.763	2.72053	3.32492	3.06998	0.259658	1.42248	0.463352	1488.09	18.9023	1486.92	23.9656	1486.06	51.5374	1486.06	51.5374	-0.137082	3.69843		1486.06	54.9414
17-18	447	150.435	34872.6	0.426524	10.7336	2.20284	3.38713	2.61056	0.263794	1.4009	0.536627	1509.22	18.8501	1501.42	20.4658	1491.24	41.7007	1491.24	41.7007	-1.20614	3.09957		1491.24	46.3228
17-18	310	975.043	164159	0.264719	10.7295	1.1028	3.36614	1.65235	0.262059	1.23048	0.744685	1500.37	16.4707	1496.55	12.9352	1491.96	20.8741	1491.96	20.8741	-0.563802	1.7884		1491.96	29.8552
17-18	411	255.94	36498.5	0.223569	10.7294	1.95456	3.27881	2.65048	0.255257	1.79018	0.675417	1465.53	23.4672	1476.04	20.6235	1491.98	36.9968	1491.98	36.9968	1.77288	2.89946		1491.98	42.3254
17-18	5	514.224	96559.4	0.191502	10.7136	1.47739	3.261	2.11394	0.253499	1.51197	0.71524	1456.49	19.7113	1471.8	16.4275	1494.76	27.954	1494.76	27.954	2.56001	2.24935		1494.76	35.0116
17-18	77	136.725	15523.9	0.495208	10.6562	2.91658	3.327	3.24665	0.257243	1.42627	0.439306	1475.72	18.8124	1487.41	25.3485	1504.91	55.1098	1504.91	55.1098	1.93972	3.80232		1504.91	58.1078
17-18	51	537.716	45935.4	0.283807	10.6445	1.54683	3.51484	2.10008	0.271469	1.42045	0.676376	1548.26	19.5505	1530.56	16.6012	1506.99	29.2172	1506.99	29.2172	-2.7383	2.37709		1506.99	35.9746
17-18	15	305.773	52523.2	0.105742	10.4336	1.84308	3.69935	2.5035	0.280056	1.69428	0.676764	1591.65	23.8957	1571.23	20.0115	1544.71	34.6433	1544.71	34.6433	-3.03848	2.78084		1544.71	40.2881
17-18	438	428.011	130386	0.379495	10.4182	1.65416	3.5451	2.22208	0.267984	1.48371	0.667712	1530.56	20.2145	1537.34	17.5989	1547.48	31.0809	1547.48	31.0809	1.09351	2.37753		1547.48	37.3831
17-18	529	170.497	2434.65	0.63021	10.3975	2.36068	3.52179	2.64135	0.265693	1.18486	0.448583	1518.9	16.0338	1532.12	20.8893	1551.22	44.335	1551.22	44.335	2.0833	2.98332		1551.22	48.524
17-18	502	218.895	32292	0.364785	10.3556	2.38732	3.55579	2.70056	0.267177	1.26243	0.467471	1526.46	17.1589	1539.73	21.4029	1558.79	44.7875	1558.79	44.7875	2.07416	3.02129		1558.79	48.9112
17-18	135	143.169	23413.3	1.09611	10.1381	2.60485	3.81413	3.15695	0.280568	1.78355	0.56496	1594.22	25.1906	1595.73	25.3979	1598.52	48.6163	1598.52	48.6163	0.268571	3.41811		1598.52	52.2264
17-18	554	294.637	46704.9	1.06231	10.0691	1.53415	3.76247	2.10246	0.274885	1.43761	0.683773	1565.55	19.982	1584.78	16.8658	1611.25	28.5836	1611.25	28.5836	2.83619	2.12346		1611.25	35.3031
17-18	283	159.571	28632.8	0.681218	10.069	2.80919	3.83693	3.20472	0.280323	1.54231	0.48126	1592.99	21.7685	1600.53	25.8142	1611.26	52.344	1611.26	52.344	1.13434	3.48436		1611.26	55.521
17-18	494	562.372	78311.7	0.534786	10.0526	1.57274	3.54835	3.18568	0.258818	2.77038	0.869637	1483.79	36.719	1538.07	25.2364	1614.29	29.2912	1614.29	29.2912	8.08425	2.82054		1614.29	35.8534
17-18	180	237.222	52625.7	0.304097	10.0187	1.7111	3.86996	2.20198	0.281325	1.38595	0.62941	1598.03	19.6161	1607.44	17.7679	1620.58	31.8424	1620.58	31.8424	1.39146	2.28456		1620.58	37.8856
17-18	253	492.958	76032.3	0.329008	10.0184	1.32604	3.51029	2.10633	0.25517	1.63654	0.776962	1465.09	21.4473	1529.53	16.6458	1620.64	24.6756	1620.64	24.6756	9.59825	1.90944		1620.64	32.3125
17-18	53	268.162	42846.7	0.0401517	10.0072	1.77204	3.97506	2.40515	0.288633	1.62623	0.676146	1634.69	23.481	1629.12	19.5133	1622.72	32.9675	1622.72	32.9675	-0.737854	2.50649		1622.72	38.7975
17-18	299	168.719	48357.4	0.64015	9.99807	1.63552	4.00377	2.1836	0.290451	1.44679	0.662569	1643.78	20.9921	1634.96	17.7413	1624.42	30.4207	1624.42	30.4207	-1.19184	2.29371		1624.42	36.7361
17-18	119	609.411	113887	0.252437	9.99125	1.24743	3.85211	1.66502	0.279258	1.10282	0.662346	1587.63	15.5193	1603.71	13.4222	1625.69	23.1975	1625.69	23.1975	2.34162	1.68914		1625.69	31.2234
17-18	392	234.564	35667	0.373441	9.99003	2.06611	3.45624	5.28832	0.250529	4.86801	0.920521	1441.2	62.8691	1517.29	41.6528	1625.92	38.4234	1625.92	38.4234	11.3607	4.39761		1625.92	43.3446
17-18	100	150.382	22906.7	0.348312	9.95524	2.20842	3.87087	2.5812	0.279607	1.33622	0.517672	1589.38	18.822	1607.63	20.829	1632.41	41.0361	1632.41	41.0361	2.63549	2.70558		1632.41	45.5692
17-18	415	115.926	19326.8	0.271177	9.95003	2.66472	3.98435	3.09278	0.287653	1.56989	0.507598	1629.79	22.6078	1631.01	25.1044	1633.38	49.5101	1633.38	49.5101	0.219623	3.32616		1633.38	52.9789
17-18	122	180.612	26302.8	0.683354	9.9478	1.6472	4.02119	2.11761	0.290248	1.3308	0.628442	1642.77	19.2987	1638.49	17.2201	1633.79	30.601	1633.79	30.601	-0.549346	2.22308		1633.79	36.8647
17-18	551	338.591	10328.7	0.461871	9.94407	1.73818	3.85366	2.1279	0.278052	1.22747	0.576846	1581.54	17.215	1604.03	17.1552	1634.49	32.2886	1634.49	32.2886	3.23955	2.18242		1634.49	38.2253
17-18	168	535.448	74693.3	0.404433	9.8988	1.17151	4.13431	1.84406	0.296943	1.42413	0.772277	1676.13	21.0193	1661.11	15.0777	1642.96	21.7403	1642.96	21.7403	-2.01876	1.85987		1642.96	30.1523
17-18	187	441.797	73083.8	0.295844	9.85885	1.34826	4.08037	1.85602	0.291887	1.27553	0.687242	1650.95	18.578	1650.39	15.1364	1650.46	24.9964	1650.46	24.9964	-0.029434	1.88736		1650.46	32.4929
17-18	572	199.315	17577.7	0.496091	9.84475	1.86008	4.08788	2.45192	0.292005	1.59751	0.651534	1651.54	23.2749	1651.89	20.0038	1653.12	34.4706	1653.12	34.4706	0.0953654	2.51436		1653.12	39.9879
17-18	152	212.707	40613.6	1.02018	9.83415	1.7773	4.10701	2.34225	0.293056	1.52556	0.651323	1656.78	22.2885	1655.7	19.1265	1655.11	32.9281	1655.11	32.9281	-0.100723	2.40405		1655.11	38.7147
17-18	61	257.993	34323.4	0.75648	9.83177	1.47163	4.0968	1.96931	0.292257	1.30862	0.664507	1652.8	19.0787	1653.67	16.0731	1655.56	27.2625	1655.56	27.2625	0.16703	2.00765		1655.56	34.2041
17-18	394	300.204	46281.2	0.721707	9.78617	1.49176	4.13695	1.9882	0.293752	1.31438	0.66109	1660.25	19.2384	1661.63	16.2583	1664.17	27.6052	1664.17	27.6052	0.235321	2.01869		1664.17	34.4572
17-18	468	325.646	67555.3	0.251853	9.77944	1.33557	4.07673	1.92707	0.289277	1.38919	0.720883	1637.92	20.0932	1649.66	15.7132	1665.44	24.7104	1665.44	24.7104	1.65272	1.89337		1665.44	32.2587
17-18	381	192.006	38623.1	0.478386	9.75641	2.13643	4.10989	2.53415	0.290943	1.36294	0.537827	1646.24	19.8013	1656.27	20.6965	1669.8	39.5085	1669.8	39.5085	1.41106	2.61679		1669.8	44.2114
17-18	87	762.676	135416	0.18513	9.61608	1.52134	4.0984	2.24968	0.285956	1.65728	0.736676	1621.29	23.7568	1653.98	18.3629	1696.55	28.0369	1696.55	28.0369	4.43607	2.11067		1696.55	34.7373
17-18	539	541.261	76612.8	0.285639	9.60584	1.46681	3.95804	3.51773	0.275869	3.19733	0.908918	1570.53	44.5661	1625.64	28.5162	1698.51	27.0251	1698.51	27.0251	7.53523	3.00815		1698.51	33.9502
17-18	477	1291.97	178636	0.0436506	9.57347	1.13159	3.89004	1.68757	0.270216	1.25196	0.74187	1541.9	17.1689	1611.62	13.6314	1704.73	20.8316	1704.73	20.8316	9.55166	1.49531		1704.73	29.4089
17-18	242	417.998	59577.3	0.22309	9.53535	1.57231	4.40807	2.27411	0.304981	1.64299	0.722475	1715.96	24.7526	1713.86	18.8217	1712.07	28.9198	1712.07	28.9198	-0.227149	2.22633		1712.07	35.4072
17-18	328	401.391	101054	0.182332	9.45506	1.3946	4.37654	2.02212	0.30025	1.46425	0.72412	1692.55	21.7967	1707.92	16.7137	1727.61	25.604	1727.61	25.604	2.02951	1.92355		1727.61	32.8168
17-18	114	164.495	16719.5	0.776277	9.44208	1.94923	3.89361	2.90969	0.266753	2.16027	0.742442	1524.3	29.3254	1612.36	23.5082	1730.13	35.7723	1730.13	35.7723	11.897	2.48823		1730.13	40.9664
17-18	408	118.789	19692.3	0.4197	9.40398	2.74255	3.89277	6.00338	0.265618	5.34032	0.889552	1518.52	72.2512	1612.18	48.5079	1737.55	50.2873	1737.55	50.2873	12.6055	4.86707		1737.55	53.5555
17-18	377	387.976	61583.1	0.316119	9.38642	1.42404	4.45145	1.99828	0.303172	1.40186	0.701534	1707.02	21.0238	1721.97	16.5686	1740.97	26.0974	1740.97	26.0974	1.95034	1.90224		1740.97	33.1703
17-18	332	337.313	56968.9	0.260948	9.33352	1.35123	4.44705	1.9137	0.301165	1.35516	0.708133	1697.08	20.22	1721.15	15.8644	1751.32	24.7309	1751.32	24.7309	3.09698	1.79039		1751.32	32.1258
17-18	600	535.213	90288.6	0.136805	9.33069	1.21751	4.24517	2.54452	0.287407	2.23433	0.878097	1628.56	32.155	1682.8	20.9115	1751.88	22.2816	1751.88	22.2816	7.03935	2.1833		1751.88	30.3376
17-18	595	283.024	58032.5	0.147728	9.31641	1.27314	4.10465	2.20975	0.277468	1.80613	0.817345	1578.6	25.2889	1655.23	18.0424	1754.68	23.2953	1754.68	23.2953	10.0352	1.87181		1754.68	31.0598
17-18	96	183.613	5794.16	0.121842	9.27512	4.01287	4.2442	5.83721	0.28563	4.23909	0.726219	1619.65	60.7129	1682.61	47.9769	1762.8	73.3507	1762.8	73.3507	8.1207	5.14569		1762.8	74.412
17-18	354	737.302	126310	0.376543	9.24457	1.38986	4.4556	2.10564	0.298869	1.58177	0.751207	1685.7	23.4627	1722.74	17.4617	1768.83	25.3826	1768.83	25.3826	4.6999	1.90517		1768.83	32.5839
17-18	388	509.235	93051.2	0.132791	9.24438	1.50718	4.66741	2.22454	0.31307	1.63615	0.735499	1755.8	25.1475	1761.42	18.6026	1768.87	27.5255	1768.87	27.5255	0.739076	2.09927		1768.87	34.2252
17-18	517	674.593	94745.8	0.180696	9.21015	1.43292	4.38879	2.11792	0.293291	1.55958	0.736376	1657.95	22.7998	1710.23	17.5147	1775.64	26.1472	1775.64	26.1472	6.62796	1.88128		1775.64	33.1522
17-18	546	369.959	74516.2	0.345126	9.19401	1.24803	4.15082	1.74773	0.276902	1.22351	0.700058	1575.74	17.1039	1664.37	14.3011	1778.84	22.7638	1778.84	22.7638	11.4176	1.48645		1778.84	30.6334
17-18	220	668.829	121281	0.344727	9.18882	1.2865	4.18172	1.92266	0.278806	1.42882	0.743149	1585.35	20.0814	1670.44	15.7551	1779.87	23.4627	1779.87	23.4627	10.929	1.62837		1779.87	31.1423
17-18	304	200.542	33455.5	0.53709	9.18806	1.99595	4.34459	4.48561	0.289641	4.01708	0.895548	1639.74	58.1599	1701.87	37.0284	1780.02	36.4031	1780.02	36.4031	7.88097	3.77159		1780.02	41.4336
17-18	95	609.943	102829	0.0185462	9.16593	1.34071	4.39994	1.84024	0.292625	1.26054	0.684988	1654.63	18.3956	1712.33	15.2254	1784.42	24.4379	1784.42	24.4379	7.27333	1.63567		1784.42	31.8528
17-18	256	160.649	33988	0.395047	9.13468	2.02975	4.92218	2.40594	0.326241	1.29177	0.536907	1820.14	20.4842	1806.07	20.3051	1790.64	36.9712	1790.64	36.9712	-1.64716	2.39023		1790.64	41.8986
17-18	599	267.28	45962.5	0.141982	9.10842	1.68518	4.25131	2.56824	0.280966	1.93804	0.754619	1596.22	27.403	1683.99	21.1123	1795.88	30.6781	1795.88	30.6781	11.1176	2.15259		1795.88	36.6802
17-18	234	71.2348	19100.6	1.55109	9.10619	3.65935	4.93466	3.93532	0.326048	1.44772	0.36788	1819.2	22.9471	1808.2	33.2284	1796.33	66.6104	1796.33	66.6104	-1.27322	3.96668		1796.33	68.2339
17-18	216	180.62	36682.5	0.526978	9.10296	2.27803	4.84983	2.68321	0.32033	1.41781	0.528402	1791.34	22.1744	1793.59	22.5884	1796.98	41.4582	1796.98	41.4582	0.313715	2.61001		1796.98	45.736
17-18	19	175.63	36069	1.20429	9.10164	1.50758	4.9648	1.99941	0.327876	1.31333	0.656859	1828.08	20.9047	1813.35	16.8985	1797.24	27.4402	1797.24	27.4402	-1.71586	1.94029		1797.24	34.1128
17-18	401	848.923	130112	0.269564	9.08779	1.48628	4.72296	2.16729	0.31143	1.57737	0.727808	1747.74	24.1472	1771.32	18.1615	1800.01	27.0433	1800.01	27.0433	2.90392	1.98183		1800.01	33.8005
17-18	171	84.5724	17602.2	0.557331	9.08342	2.61222	5.06421	2.97937	0.333771	1.43282	0.480913	1856.64	23.1141	1830.13	25.2647	1800.89	47.519	1800.89	47.519	-3.09565	3.00791		1800.89	51.0383
17-18	1	552.814	79601.1	0.313657	9.08023	1.55288	4.7669	2.30758	0.314066	1.7069	0.73969	1760.68	26.2984	1779.09	19.3684	1801.53	28.2499	1801.53	28.2499	2.26703	2.11653		1801.53	34.7385
17-18	181	234.003	4790.37	0.432059	9.07935	4.02488	4.40382	4.32534	0.290116	1.58397	0.366208	1642.11	22.962	1713.06	35.7952	1801.7	73.2178	1801.7	73.2178	8.8578	3.91698		1801.7	74.2602
17-18	270	525.208	86579.7	0.117546	9.07093	1.40312	4.49474	2.1502	0.295831	1.62929	0.757742	1670.6	23.9781	1730	17.8598	1803.39	25.5195	1803.39	25.5195	7.36307	1.86716		1803.39	32.6286
17-18	23	103.561	13772.6	4.00034	9.06404	3.49922	4.92035	3.75767	0.323597	1.36948	0.364451	1807.27	21.5836	1805.75	31.7126	1804.77	63.629	1804.77	63.629	-0.138619	3.72754		1804.77	65.5131
17-18	426	134.401	39907.4	0.601197	9.05967	1.96102	4.94567	2.33649	0.325106	1.27027	0.543665	1814.62	20.0904	1810.09	19.7347	1805.65	35.6532	1805.65	35.6532	-0.496726	2.27499		1805.65	40.7673
17-18	335	129.016	18529.5	1.09724	9.04762	2.25177	4.37047	7.02642	0.286913	6.65584	0.947258	1626.08	95.6598	1706.77	58.0762	1808.07	40.9282	1808.07	40.9282	10.0651	5.66888		1808.07	45.2605
17-18	178	341.614	70549.1	0.295935	9.04261	1.30792	5.02718	1.9384	0.329842	1.43064	0.738054	1837.62	22.8747	1823.91	16.4169	1809.07	23.7676	1809.07	23.7676	-1.57776	1.83842		1809.07	31.3137
17-18	351	545.284	101729	0.199536	9.03285	1.49753	4.709	2.11016	0.308632	1.48666	0.704528	1733.97	22.6024	1768.84	17.6736	1811.04	27.2074	1811.04	27.2074	4.25539	1.90435		1811.04	33.9123
17-18	284	31.718	11160.2	1.46407	9.03208	6.28019	5.15257	6.50844	0.337675	1.70852	0.262509	1875.48	27.8028	1844.82	55.3582	1811.19	114.129	1811.19	114.129	-3.54939	6.70315		1811.19	111.695
17-18	443	492.211	146740	0.263163	9.01311	1.39796	4.76421	1.96497	0.311568	1.38088	0.702749	1748.42	21.1465	1778.61	16.491	1815.01	25.3857	1815.01	25.3857	3.66888	1.78122		1815.01	32.5104
17-18	177	348.549	31159.4	0.87761	8.99188	1.38707	5.09058	1.99895	0.332128	1.43939	0.720074	1848.69	23.1344	1834.54	16.9649	1819.29	25.1748	1819.29	25.1748	-1.6161	1.89584		1819.29	32.3476
17-18	590	87.2188	14868.2	0.840014	8.98831	3.14352	4.47767	4.79149	0.292024	3.61616	0.754705	1651.63	52.6885	1726.84	39.7752	1820.01	57.0564	1820.01	57.0564	9.25144	4.05886		1820.01	59.5461
17-18	582	266.153	57049.5	1.03588	8.97792	1.57873	5.0984	2.22524	0.332122	1.56822	0.704742	1848.66	25.2046	1835.84	18.8902	1822.11	28.6441	1822.11	28.6441	-1.45706	2.11122		1822.11	35.0226
17-18	224	239.193	43814.9	0.0071809	8.97739	1.5186	5.00034	2.11074	0.325715	1.46597	0.694529	1817.58	23.2183	1819.38	17.8607	1822.22	27.5527	1822.22	27.5527	0.254442	1.97439		1822.22	34.1661
17-18	314	238.09	45012	0.792544	8.96169	1.66887	5.23291	2.35295	0.340268	1.65869	0.704939	1887.96	27.1464	1857.99	20.059	1825.39	30.2679	1825.39	30.2679	-3.42758	2.26999		1825.39	36.3114
17-18	117	414.636	56860.5	0.427044	8.96088	1.08867	5.0012	1.54497	0.325172	1.09623	0.709548	1814.94	17.3405	1819.53	13.0735	1825.55	19.7431	1825.55	19.7431	0.581611	1.43468		1825.55	28.4423
17-18	497	200.641	36195.1	0.992712	8.95069	1.72797	4.6033	2.41639	0.29896	1.6891	0.69902	1686.15	25.0607	1749.87	20.1575	1827.62	31.3313	1827.62	31.3313	7.74055	2.09327		1827.62	37.1673
17-18	127	195.04	34492.1	0.712599	8.93346	1.54951	5.06164	1.97667	0.328094	1.2273	0.620891	1829.14	19.5451	1829.7	16.7601	1831.11	28.0868	1831.11	28.0868	0.107775	1.86735		1831.11	34.5665
17-18	209	175.386	37694.3	0.480815	8.92174	1.94797	5.16527	2.51333	0.334372	1.58816	0.631892	1859.54	25.6546	1846.91	21.3814	1833.49	35.2958	1833.49	35.2958	-1.42058	2.40202		1833.49	40.4325
17-18	334	930.201	106893	0.327079	8.92108	1.41089	4.70501	2.28584	0.304555	1.79846	0.786783	1713.86	27.066	1768.13	19.1423	1833.63	25.5663	1833.63	25.5663	6.5319	1.96907		1833.63	32.6163
17-18	153	192.4	36078.8	0.221556	8.92008	1.5921	5.1421	2.27862	0.33281	1.63012	0.7154	1851.99	26.2402	1843.09	19.3704	1833.83	28.8494	1833.83	28.8494	-0.99031	2.13813		1833.83	35.1634
17-18	286	508.32	126732	0.096183	8.90017	1.32454	5.04898	2.00971	0.326054	1.51147	0.752082	1819.23	23.9578	1827.58	17.0332	1837.88	23.9891	1837.88	23.9891	1.0146	1.83537		1837.88	31.4273
17-18	136	195.212	39460.7	0.511391	8.89251	1.88957	5.10465	2.41159	0.329366	1.49842	0.621343	1835.31	23.9325	1836.88	20.4764	1839.44	34.2126	1839.44	34.2126	0.224494	2.26643		1839.44	39.5197
17-18	144	321.964	59245.7	0.356673	8.89131	1.41544	4.92668	1.93819	0.31784	1.32406	0.683142	1779.17	20.586	1806.84	16.3599	1839.68	25.6297	1839.68	25.6297	3.28912	1.75142		1839.68	32.6543
17-18	83	91.8547	16047.8	0.588952	8.8883	3.05234	4.76353	3.77935	0.30721	2.22862	0.589684	1726.96	33.7634	1778.49	31.7193	1840.29	55.2607	1840.29	55.2607	6.15823	3.36252		1840.29	57.9109
17-18	39	330.433	58947.4	0.546747	8.88452	1.42275	5.20054	1.86514	0.335251	1.20605	0.646624	1863.78	19.5205	1852.71	15.8844	1841.06	25.7539	1841.06	25.7539	-1.23409	1.76907		1841.06	32.7494
17-18	575	439.139	89480.6	1.03672	8.88451	1.46519	5.0484	2.06856	0.325443	1.46019	0.705898	1816.26	23.1122	1827.48	17.5316	1841.07	26.5223	1841.07	26.5223	1.34758	1.89624		1841.07	33.3374
17-18	399	65.9121	11808.7	1.17165	8.88372	3.08472	5.23079	3.34846	0.33717	1.30258	0.389007	1873.04	21.1731	1857.65	28.5448	1841.23	55.8407	1841.23	55.8407	-1.72798	3.29255		1841.23	58.4322
17-18	336	344.48	56797.1	0.337888	8.88047	1.68511	5.14794	2.86213	0.331709	2.31348	0.808308	1846.66	37.1478	1844.05	24.3357	1841.89	30.5009	1841.89	30.5009	-0.258929	2.61228		1841.89	36.474
17-18	360	479.499	101296	0.58835	8.87453	1.24787	5.40594	1.91674	0.3481	1.4549	0.759048	1925.52	24.2178	1885.8	16.4245	1843.1	22.5822	1843.1	22.5822	-4.47189	1.83438		1843.1	30.3933
17-18	474	558.853	90684.8	0.100947	8.8729	1.16991	5.03525	1.79282	0.324171	1.35849	0.757743	1810.07	21.4391	1825.27	15.188	1843.43	21.1703	1843.43	21.1703	1.80993	1.61991		1843.43	29.3897
17-18	457	471.503	93556.4	0.375945	8.86725	1.33821	5.06976	1.9156	0.326185	1.37066	0.715526	1819.86	21.7325	1831.06	16.2465	1844.59	24.2131	1844.59	24.2131	1.34021	1.7508		1844.59	31.5845
17-18	211	182.742	41946.8	0.527721	8.86283	1.85576	5.16971	2.34632	0.33245	1.43574	0.611911	1850.25	23.0924	1847.64	19.9633	1845.49	33.5757	1845.49	33.5757	-0.25787	2.21197		1845.49	38.9825
17-18	294	198.462	33398	0.285062	8.85918	1.6352	5.12153	2.05331	0.329216	1.24186	0.604807	1834.58	19.8279	1839.68	17.4436	1846.23	29.5819	1846.23	29.5819	0.631141	1.92052		1846.23	35.7298
17-18	265	225.467	33358.2	0.226099	8.85768	1.924	5.16697	2.38734	0.332081	1.41337	0.592026	1848.46	22.7137	1847.19	20.3106	1846.54	34.8061	1846.54	34.8061	-0.103979	2.25243		1846.54	40.0046
17-18	407	348.132	79253.3	0.597761	8.85279	1.52144	5.10561	2.20378	0.327956	1.59432	0.723449	1828.47	25.3821	1837.04	18.7124	1847.54	27.5192	1847.54	27.5192	1.03225	2.01506		1847.54	34.0992
17-18	85	90.8938	17654.2	0.711017	8.84942	3.23923	5.13663	3.50401	0.329823	1.33622	0.38134	1837.52	21.3641	1842.18	29.7835	1848.23	58.5925	1848.23	58.5925	0.579151	3.35712		1848.23	60.9055
17-18	306	607.252	166818	1.09384	8.84838	1.15069	4.97255	1.73261	0.31925	1.29532	0.747611	1786.06	20.2069	1814.67	14.6473	1848.44	20.8099	1848.44	20.8099	3.37452	1.54221		1848.44	29.1293
17-18	163	217.74	37899.4	0.318533	8.84363	1.74249	5.24198	2.27273	0.336367	1.45911	0.64201	1869.17	23.6753	1859.47	19.3804	1849.41	31.5111	1849.41	31.5111	-1.06847	2.14575		1849.41	37.2811
17-18	120	352.821	104119	0.458422	8.82615	1.11386	5.20298	1.52616	0.333205	1.0433	0.683612	1853.9	16.809	1853.1	12.9984	1852.99	20.1327	1852.99	20.1327	-0.0489141	1.41581		1852.99	28.6546
17-18	484	203.338	67829.8	0.59042	8.82409	1.50077	5.0211	2.10695	0.321482	1.47882	0.701878	1796.96	23.1915	1822.89	17.8409	1853.41	27.126	1853.41	27.126	3.04564	1.8919		1853.41	33.7838
17-18	589	249.514	54503.7	0.899271	8.81539	1.59844	5.28589	2.16366	0.338102	1.45823	0.673963	1877.53	23.7521	1866.59	18.4749	1855.19	28.8854	1855.19	28.8854	-1.20427	2.03032		1855.19	35.1654
17-18	376	295.138	52415.4	0.664363	8.81193	1.59518	4.84747	2.78043	0.309937	2.27732	0.819052	1740.4	34.7349	1793.18	23.405	1855.9	28.8241	1855.9	28.8241	6.22343	2.37152		1855.9	35.1158
17-18	348	108.215	22789.9	0.450737	8.79948	2.34071	5.30434	2.77255	0.338669	1.48597	0.535957	1880.26	24.2343	1869.56	23.6876	1858.45	42.2849	1858.45	42.2849	-1.17361	2.64566		1858.45	46.3818
17-18	128	341.397	69053.9	0.679128	8.79511	1.3294	5.17506	1.83234	0.330251	1.26102	0.688201	1839.6	20.1814	1848.52	15.5926	1859.35	24.0108	1859.35	24.0108	1.06233	1.67644		1859.35	31.4127
17-18	197	254.808	43139.8	0.290427	8.79238	1.65009	5.17043	2.17714	0.329853	1.42026	0.65235	1837.67	22.7092	1847.76	18.5242	1859.91	29.802	1859.91	29.802	1.19589	1.99931		1859.91	35.8887
17-18	202	110.009	24805.7	1.09216	8.78441	2.72029	5.30299	3.03156	0.338003	1.33805	0.441374	1877.06	21.7899	1869.34	25.8996	1861.55	49.1248	1861.55	49.1248	-0.833029	2.90698		1861.55	52.3987
17-18	32	372.385	57168.5	1.68169	8.78325	1.1942	5.26754	1.6641	0.335699	1.15892	0.696428	1865.95	18.7765	1863.62	14.2012	1861.79	21.5622	1861.79	21.5622	-0.223348	1.53766		1861.79	29.6352
17-18	54	245.436	48757.8	0.131765	8.77968	1.70835	5.38493	2.29371	0.343041	1.53056	0.667288	1901.28	25.2016	1882.46	19.6429	1862.52	30.8447	1862.52	30.8447	-2.08115	2.16536		1862.52	36.7244
17-18	564	416.687	82481.4	0.254893	8.77409	1.34387	4.95851	1.90146	0.315676	1.3452	0.707457	1768.58	20.8064	1812.28	16.0672	1863.67	24.2595	1863.67	24.2595	5.10257	1.66503		1863.67	31.5899
17-18	290	285.155	49154.4	0.292628	8.76763	1.67237	5.16882	2.12583	0.328822	1.31238	0.617347	1832.67	20.9349	1847.5	18.0867	1865	30.186	1865	30.186	1.73357	1.94672		1865	36.1891
17-18	92	75.0928	26983.2	0.613248	8.75728	2.14592	5.36826	2.69855	0.341107	1.63621	0.60633	1891.99	26.8278	1879.81	23.0989	1867.13	38.7249	1867.13	38.7249	-1.33153	2.54587		1867.13	43.2976
17-18	237	372.652	75229.5	0.750416	8.75468	1.36789	5.2726	1.91192	0.334929	1.33579	0.698663	1862.23	21.6048	1864.44	16.3187	1867.67	24.6851	1867.67	24.6851	0.291383	1.75353		1867.67	31.898
17-18	598	135.17	24192.2	0.516038	8.75095	1.81567	5.27	2.22993	0.334621	1.29457	0.580542	1860.74	20.9237	1864.02	19.0316	1868.44	32.7594	1868.44	32.7594	0.411936	2.07433		1868.44	38.2792
17-18	276	374.949	57882.4	0.259652	8.74234	1.44694	4.91116	2.04204	0.311529	1.44094	0.705636	1748.23	22.064	1804.17	17.2272	1870.21	26.1037	1870.21	26.1037	6.52258	1.75901		1870.21	32.9688
17-18	199	139.909	27403	0.581249	8.73734	1.96228	5.42533	2.44885	0.343948	1.46503	0.598251	1905.64	24.1699	1888.86	20.9961	1871.25	35.393	1871.25	35.393	-1.83769	2.31916		1871.25	40.466
17-18	254	148.187	29060.6	0.386656	8.73095	2.00989	5.39484	2.46717	0.341765	1.43082	0.579946	1895.16	23.494	1884.03	21.1345	1872.57	36.2459	1872.57	36.2459	-1.20644	2.32631		1872.57	41.1825
17-18	146	204.096	40039.1	0.34789	8.72711	1.51164	5.2185	2.04622	0.330449	1.37911	0.673982	1840.56	22.0813	1855.64	17.4362	1873.36	27.2606	1873.36	27.2606	1.75107	1.85293		1873.36	33.8571
17-18	586	75.7967	14741.5	2.11979	8.72122	3.94225	5.3014	4.21742	0.335471	1.49843	0.355296	1864.85	24.2648	1869.09	36.031	1874.58	71.0819	1874.58	71.0819	0.519179	3.98811		1874.58	72.2525
17-18	512	415.318	89100.5	0.189019	8.71792	1.39161	5.22741	2.10813	0.330664	1.58355	0.751162	1841.6	25.367	1857.1	17.9687	1875.26	25.0903	1875.26	25.0903	1.79484	1.88582		1875.26	32.19
17-18	159	332.129	36866.6	0.400111	8.71649	1.4388	5.31864	2.09795	0.33638	1.52684	0.727776	1869.23	24.7749	1871.86	17.9314	1875.56	25.9402	1875.56	25.9402	0.337233	1.90915		1875.56	32.835
17-18	410	138.282	20607.3	1.0899	8.71437	2.33889	5.16374	2.78467	0.326503	1.51129	0.542718	1821.41	23.9798	1846.66	23.6888	1875.99	42.1627	1875.99	42.1627	2.90953	2.52892		1875.99	46.2543
17-18	222	430.082	67703.6	0.23351	8.693	1.35667	5.18364	2.08192	0.326959	1.5792	0.758528	1823.62	25.0836	1849.93	17.7213	1880.42	24.4411	1880.42	24.4411	3.02037	1.83529		1880.42	31.6968
17-18	246	318.693	56186.1	0.229869	8.68547	1.54014	5.44524	2.20785	0.343161	1.58195	0.716513	1901.86	26.0545	1892.01	18.9404	1881.98	27.7419	1881.98	27.7419	-1.0563	2.03364		1881.98	34.2222
17-18	133	367.783	58297.9	0.262069	8.68535	1.35067	5.27103	1.96613	0.332178	1.42876	0.726687	1848.93	22.9661	1864.18	16.7807	1882.01	24.3284	1882.01	24.3284	1.75757	1.76123		1882.01	31.61
17-18	13	154.387	42006.7	0.237476	8.68157	1.83828	5.36682	2.32771	0.338067	1.42792	0.613445	1877.36	23.2567	1879.58	19.9236	1882.79	33.11	1882.79	33.11	0.288189	2.14488		1882.79	38.5482
17-18	3	325.644	67249	0.309796	8.6779	1.8241	5.01181	2.6192	0.315571	1.87958	0.717618	1768.06	29.0646	1821.32	22.172	1883.55	32.8516	1883.55	32.8516	6.13126	2.24978		1883.55	38.3339
17-18	262	611.977	93001.6	0.347856	8.67617	1.34375	5.25498	1.90705	0.330816	1.35321	0.709581	1842.33	21.6846	1861.58	16.2684	1883.91	24.1983	1883.91	24.1983	2.20687	1.70374		1883.91	31.5098
17-18	452	37.1728	7020.72	0.695229	8.66089	9.24076	5.30377	9.40928	0.3333	1.77282	0.188412	1854.35	28.5687	1869.47	80.4262	1887.09	166.442	1887.09	166.442	1.73442	8.79833		1887.09	158.797
17-18	205	353.585	85107	0.285573	8.65175	1.44666	5.36215	2.22915	0.336613	1.69596	0.76081	1870.35	27.5334	1878.83	19.0773	1888.99	26.0361	1888.99	26.0361	0.986331	1.99674		1888.99	32.8894
17-18	10	86.6442	9825.38	0.133768	8.65007	2.69838	5.5141	2.99614	0.346084	1.30215	0.434608	1915.87	21.5819	1902.8	25.7535	1889.33	48.5667	1889.33	48.5667	-1.40469	2.84599		1889.33	51.8725
17-18	161	98.7127	20481.1	0.423173	8.64902	2.17756	5.46829	2.6097	0.343168	1.43833	0.551147	1901.89	23.6893	1895.63	22.4027	1889.55	39.1902	1889.55	39.1902	-0.652933	2.43512		1889.55	43.6681
17-18	578	315.434	56314.8	0.235624	8.63018	1.50377	5.45833	2.23903	0.341796	1.6589	0.7409	1895.31	27.2408	1894.07	19.2151	1893.47	27.0495	1893.47	27.0495	-0.096778	2.02843		1893.47	33.6677
17-18	454	98.2716	21583.8	0.835901	8.6169	3.13656	5.44311	3.43177	0.340319	1.39249	0.405765	1888.2	22.7924	1891.67	29.4395	1896.24	56.408	1896.24	56.408	0.42397	3.1967		1896.24	58.8932
17-18	324	616.26	199787	0.250484	8.60623	1.20913	5.41463	1.73459	0.338119	1.24371	0.717005	1877.61	20.2587	1887.17	14.8673	1898.47	21.7357	1898.47	21.7357	1.09869	1.55592		1898.47	29.6958
17-18	570	126.879	27844.8	0.312135	8.60598	2.23462	5.3138	2.99948	0.331813	2.00083	0.667059	1847.16	32.135	1871.08	25.6338	1898.52	40.1743	1898.52	40.1743	2.70517	2.6653		1898.52	44.5078
17-18	479	326.656	67111.1	0.601991	8.59683	1.3037	5.38986	1.82194	0.336205	1.27272	0.698553	1868.39	20.6434	1883.24	15.6048	1900.44	23.4307	1900.44	23.4307	1.68646	1.62762		1900.44	30.9177
17-18	149	236.385	57417	0.679438	8.59594	1.6223	5.48555	2.146	0.342138	1.4048	0.654615	1896.95	23.0855	1898.34	18.4308	1900.62	29.157	1900.62	29.157	0.193335	1.95439		1900.62	35.3152
17-18	487	201.351	59877.3	0.874638	8.59177	1.35133	5.72024	1.97152	0.356603	1.43554	0.728142	1966.05	24.3258	1934.43	17.04	1901.49	24.2838	1901.49	24.2838	-3.39511	1.83853		1901.49	31.5474
17-18	257	531.78	78035	0.301362	8.58761	1.22654	5.3678	1.80639	0.334469	1.32614	0.734137	1860.01	21.4266	1879.73	15.4617	1902.36	22.0425	1902.36	22.0425	2.22655	1.59751		1902.36	29.9048
17-18	282	176.925	48480.5	0.385581	8.58525	1.48184	5.71154	2.05672	0.35579	1.42628	0.693472	1962.19	24.1282	1933.12	17.7725	1902.86	26.6251	1902.86	26.6251	-3.118	1.92084		1902.86	33.3238
17-18	101	285.832	50091.5	0.386081	8.57843	1.43555	5.44088	2.03396	0.33866	1.44089	0.708419	1880.22	23.4987	1891.32	17.4464	1904.29	25.7928	1904.29	25.7928	1.26369	1.81968		1904.29	32.6791
17-18	36	156.95	36056.8	0.526825	8.56837	1.67378	5.64535	2.20197	0.350975	1.43078	0.649772	1939.25	23.9618	1923.05	18.9944	1906.4	30.0657	1906.4	30.0657	-1.72361	2.03803		1906.4	36.031
17-18	169	131.904	22987.4	0.750923	8.54432	1.63238	5.69604	2.03478	0.353133	1.21478	0.597005	1949.54	20.4368	1930.77	17.5758	1911.44	29.3043	1911.44	29.3043	-1.99318	1.89425		1911.44	35.4132
17-18	571	119.861	37420	0.490972	8.51817	2.23069	5.55776	2.68918	0.343506	1.50191	0.558499	1903.51	24.7546	1909.58	23.1427	1916.94	40.0157	1916.94	40.0157	0.700644	2.44219		1916.94	44.3483
17-18	420	285.87	49572.1	0.566667	8.51173	1.13456	5.494	1.5427	0.339308	1.04531	0.677588	1883.34	17.0718	1899.66	13.2524	1918.3	20.3467	1918.3	20.3467	1.82246	1.36981		1918.3	28.6877
17-18	372	142.523	30285.9	0.382286	8.31872	1.7444	5.75259	2.79667	0.347222	2.18597	0.781632	1921.32	36.3188	1939.31	24.1927	1959.34	31.1346	1959.34	31.1346	1.94021	2.42156		1959.34	36.8266
17-18	106	119.402	22661.3	0.611829	8.31593	1.95045	5.85339	2.42521	0.353189	1.44132	0.594307	1949.81	24.2509	1954.35	21.0328	1959.93	34.8105	1959.93	34.8105	0.516771	2.15708		1959.93	39.866
17-18	330	137.602	32376.7	0.460851	8.24794	1.81913	6.29292	2.33783	0.376605	1.46842	0.62811	2060.4	25.8967	2017.47	20.4837	1974.57	32.4108	1974.57	32.4108	-4.34679	2.15722		1974.57	37.8548
17-18	558	257.035	50206.7	0.673644	8.22123	1.30685	5.50525	1.8178	0.328399	1.26354	0.695095	1830.62	20.1364	1901.42	15.6206	1980.35	23.2707	1980.35	23.2707	7.56094	1.48789		1980.35	30.6696
17-18	239	211.783	33836.3	0.390547	8.21217	1.76298	5.3242	2.36314	0.317249	1.57363	0.665909	1776.28	24.4318	1872.76	20.2014	1982.31	31.386	1982.31	31.386	10.3935	1.87932		1982.31	36.9998
17-18	35	256.257	62501.4	0.459641	7.85709	1.25209	6.66312	1.74889	0.379863	1.22102	0.698167	2075.64	21.6686	2067.75	15.4409	2060.64	22.0903	2060.64	22.0903	-0.728274	1.50724		2060.64	29.6837
17-18	115	127.293	20428.6	0.372896	7.85544	1.94455	6.49075	2.42642	0.369958	1.4513	0.598122	2029.21	25.2651	2044.65	21.3492	2061.01	34.3019	2061.01	34.3019	1.54309	2.04643		2061.01	39.3201
17-18	121	120.453	3134.9	0.592498	7.67578	6.34015	7.18803	6.53067	0.400331	1.56591	0.239778	2170.57	28.8586	2135.02	58.2287	2101.73	111.354	2101.73	111.354	-3.27531	5.64141		2101.73	108.991
17-18	17	123.401	7449.23	1.23425	7.46088	2.67732	7.26104	3.11251	0.393076	1.58734	0.509988	2137.08	28.8729	2144.03	27.7799	2151.44	46.7532	2151.44	46.7532	0.667778	2.54176		2151.44	50.0209
17-18	345	127.476	29544.1	0.718977	7.20524	1.98263	7.70607	2.54905	0.402874	1.60214	0.628523	2182.26	29.6598	2197.31	22.9106	2212.12	34.3899	2212.12	34.3899	1.35001	2.03708		2212.12	39.2239
17-18	4	119.72	30942.2	0.317617	6.98369	1.69309	8.04184	2.17431	0.407501	1.36422	0.627425	2203.49	25.4614	2235.73	19.6365	2266.13	29.196	2266.13	29.196	2.76451	1.68278		2266.13	34.8751
17-18	162	102.569	28006.4	0.693186	6.85837	1.88307	8.10675	2.41407	0.403418	1.51055	0.625728	2184.76	27.9912	2243	21.8212	2297.31	32.365	2297.31	32.365	4.89926	1.81098		2297.31	37.4355
17-18	316	249.258	76911	0.447559	6.83236	1.31198	8.17604	1.86573	0.405323	1.32652	0.710991	2193.51	24.6636	2250.69	16.8801	2303.84	22.5321	2303.84	22.5321	4.78901	1.41886		2303.84	29.6595
17-18	523	78.9893	18223.8	1.1351	6.82525	2.27545	8.19932	2.97665	0.406054	1.91907	0.644706	2196.86	35.7265	2253.27	26.9405	2305.63	39.076	2305.63	39.076	4.71756	2.23804		2305.63	43.1391
17-18	158	310.331	46922.7	0.421856	6.75257	1.37351	8.08	1.98203	0.395885	1.42896	0.720957	2150.06	26.1251	2240.01	17.9093	2323.99	23.544	2323.99	23.544	7.48417	1.46362		2323.99	30.3791
17-18	113	253.185	63560.6	0.245086	6.66953	1.41841	8.64477	2.02756	0.418347	1.44884	0.714572	2252.97	27.5482	2301.28	18.4535	2345.17	24.2546	2345.17	24.2546	3.93158	1.53852		2345.17	30.8952
17-18	504	112.956	38659.2	0.361633	6.65477	1.91814	8.48538	2.44865	0.409725	1.52204	0.621585	2213.66	28.5169	2284.36	22.2428	2348.96	32.7891	2348.96	32.7891	5.75996	1.79008		2348.96	37.7376
17-18	545	363.85	84410	0.502252	6.65401	1.44561	8.86321	2.04253	0.42792	1.44297	0.706461	2296.33	27.8763	2324.02	18.6374	2349.16	24.7096	2349.16	24.7096	2.24867	1.57014		2349.16	31.2369
17-18	325	197.927	34842.2	0.337328	6.30671	1.26379	8.68349	2.48313	0.39736	2.13747	0.860797	2156.87	39.1828	2305.35	22.6105	2440.36	21.4045	2440.36	21.4045	11.6166	1.78296		2440.36	28.646
17-18	217	84.6603	22924.2	0.55175	6.23498	1.99278	10.7744	2.47529	0.487432	1.46829	0.593179	2559.55	31.0175	2503.86	23	2459.72	33.6799	2459.72	33.6799	-4.05892	1.90272		2459.72	38.37
17-18	261	67.6163	20080.5	0.338364	6.17988	1.65803	10.6811	2.22421	0.478945	1.48259	0.666569	2522.67	30.951	2495.79	20.6516	2474.7	27.9789	2474.7	27.9789	-1.93814	1.70074		2474.7	33.6563
17-18	148	184.984	63835.7	0.416549	5.99632	1.26169	10.6456	1.77982	0.463173	1.25535	0.705325	2453.55	25.6173	2492.7	16.5206	2525.46	21.1876	2525.46	21.1876	2.84726	1.30126		2525.46	28.3785
17-18	425	156.782	38233.7	0.235025	5.95926	1.63501	9.68744	6.09587	0.41888	5.87251	0.963359	2255.39	111.763	2405.51	56.1192	2535.86	27.4285	2535.86	27.4285	11.0603	4.51104		2535.86	33.1415
17-18	160	87.6158	22051	0.80845	5.95862	1.52938	11.4904	2.12972	0.496787	1.48212	0.695925	2599.97	31.7113	2563.81	19.8941	2536.05	25.656	2536.05	25.656	-2.52072	1.62458		2536.05	31.7392
17-18	60	58.8132	9478.39	0.691619	5.90895	3.17359	9.64569	9.11019	0.413553	8.53955	0.937362	2231.15	161.063	2401.54	83.8617	2550.08	53.1621	2550.08	53.1621	12.5067	6.5741		2550.08	55.458
17-18	373	59.0713	18148.7	0.605034	5.89246	1.84963	11.5444	2.44693	0.49358	1.60198	0.65469	2586.15	34.1276	2568.19	22.8661	2554.75	30.9658	2554.75	30.9658	-1.22883	1.81383		2554.75	36.0118
17-18	453	74.6044	22241	1.06067	5.80538	1.73876	10.5428	2.28316	0.444094	1.4797	0.648095	2368.94	29.3341	2483.69	21.1752	2579.65	29.0444	2579.65	29.0444	8.16825	1.53691		2579.65	34.3997
17-18	543	587.806	127425	0.655771	5.71403	1.26478	11.6799	1.86011	0.484249	1.36395	0.733263	2545.75	28.6867	2579.09	17.3982	2606.11	21.067	2606.11	21.067	2.31604	1.35469		2606.11	28.1956
17-18	145	55.7173	17834.4	0.446168	5.69836	2.39859	10.9616	2.84224	0.453224	1.52482	0.536485	2409.57	30.6562	2519.88	26.4484	2610.68	39.9412	2610.68	39.9412	7.70324	1.83652		2610.68	43.6263
17-18	450	221.503	47177.7	0.886236	5.66029	1.38409	11.0221	2.33712	0.452679	1.8832	0.805776	2407.15	37.83	2525	21.7576	2621.84	23.026	2621.84	23.026	8.18828	1.6529		2621.84	29.6201
17-18	532	96.0499	32323.9	0.395423	5.65949	1.41098	12.4452	2.84922	0.511055	2.47532	0.868769	2661.13	53.9683	2638.6	26.7803	2622.07	23.4728	2622.07	23.4728	-1.48956	2.24983		2622.07	29.9578
17-18	268	260.754	62256.7	0.333664	5.65252	1.39753	11.784	2.02557	0.483306	1.46624	0.723863	2541.65	30.7975	2587.39	18.9591	2624.12	23.2444	2624.12	23.2444	3.14286	1.45379		2624.12	29.7821
17-18	12	129.44	31339.4	0.703066	5.60504	1.69849	10.833	4.76614	0.44057	4.45322	0.934347	2353.19	87.7971	2508.9	44.3118	2638.14	28.2061	2638.14	28.2061	10.8012	3.46194		2638.14	33.6628
17-18	48	249.867	2155.13	0.664531	5.58499	2.7728	12.0215	3.44885	0.487156	2.0509	0.59466	2558.36	43.3087	2606.08	32.3325	2644.09	46.0264	2644.09	46.0264	3.24218	2.3494		2644.09	48.9843
17-18	597	265.603	68007.7	0.556537	5.56761	1.11282	11.526	2.17747	0.465622	1.87163	0.859544	2464.33	38.331	2566.69	20.3452	2649.26	18.4585	2649.26	18.4585	6.98038	1.58538		2649.26	26.3021
17-18	538	342.432	97322	1.20647	5.55643	1.44082	12.3899	1.97288	0.499519	1.3477	0.683113	2611.73	28.9409	2634.41	18.5367	2652.59	23.8934	2652.59	23.8934	1.54051	1.40603		2652.59	30.2507
17-18	451	103.668	27636.8	1.08658	5.52794	1.37047	12.709	1.93706	0.509758	1.36895	0.706717	2655.6	29.7965	2658.33	18.2344	2661.12	22.7143	2661.12	22.7143	0.207486	1.40687		2661.12	29.3409
17-18	569	43.9604	13053.2	0.71481	5.50252	2.59265	12.1041	3.16084	0.483263	1.80806	0.572018	2541.46	37.975	2612.51	29.6476	2668.75	42.9345	2668.75	42.9345	4.76961	2.09093		2668.75	46.2146
17-18	419	523.804	159652	0.379679	5.49475	1.04879	12.0322	1.83313	0.479713	1.50346	0.820163	2526.02	31.4208	2606.92	17.1854	2671.1	17.366	2671.1	17.366	5.4314	1.32731		2671.1	25.5313
17-18	263	63.4533	15453.4	0.539087	5.49298	1.63024	12.8551	2.17143	0.512355	1.43437	0.660564	2666.67	31.3254	2669.09	20.4576	2671.63	26.9928	2671.63	26.9928	0.185422	1.54655		2671.63	32.6495
17-18	522	90.104	28088.2	0.366533	5.46919	1.92286	12.7088	2.52931	0.504329	1.64317	0.64965	2632.37	35.5118	2658.31	23.8098	2678.81	31.8101	2678.81	31.8101	1.7335	1.76606		2678.81	36.5922
17-18	230	267.191	77368.6	0.19776	5.44413	1.34097	12.4598	2.16229	0.492185	1.69627	0.784476	2580.12	36.0678	2639.7	20.325	2686.41	22.1656	2686.41	22.1656	3.95643	1.55903		2686.41	28.9034
17-18	58	1346.65	64963.2	0.375359	5.43956	1.46981	12.0122	2.15023	0.474103	1.56943	0.729892	2501.53	32.5392	2605.36	20.1558	2687.8	24.293	2687.8	24.293	6.93011	1.47418		2687.8	30.5145
17-18	190	99.0985	21532.1	0.374182	5.43105	1.42675	12.4279	1.95268	0.489743	1.33317	0.682738	2569.57	28.2528	2637.29	18.3511	2690.38	23.5754	2690.38	23.5754	4.49055	1.34286		2690.38	29.9674
17-18	549	352.972	97356.5	0.453912	5.42918	1.17692	13.1264	1.76216	0.517092	1.31152	0.744267	2686.83	28.817	2688.78	16.6264	2690.95	19.445	2690.95	19.445	0.152804	1.29126		2690.95	26.934
17-18	465	43.6224	19199.4	1.11299	5.42332	2.64608	13.156	3.11252	0.517698	1.63892	0.526557	2689.41	36.0386	2690.91	29.3735	2692.73	43.7208	2692.73	43.7208	0.123294	2.10262		2692.73	46.8972
17-18	175	93.1319	36972.8	0.778391	5.41026	1.30387	13.6066	1.93202	0.534139	1.4257	0.737932	2758.87	31.999	2722.72	18.2748	2696.72	21.5318	2696.72	21.5318	-2.30467	1.44057		2696.72	28.4272
17-18	116	125.677	43545.6	0.649854	5.3931	1.40612	13.123	2.0114	0.51352	1.43826	0.715052	2671.64	31.4576	2688.53	18.9779	2701.96	23.216	2701.96	23.216	1.12222	1.44127		2701.96	29.674
17-18	90	74.4032	30372.3	0.600968	5.37943	1.91632	13.4064	2.55351	0.523284	1.68763	0.660909	2713.09	37.3727	2708.71	24.1293	2706.15	31.6277	2706.15	31.6277	-0.256565	1.81113		2706.15	36.4114
17-18	369	141.394	27510.2	0.611493	5.37933	1.35069	12.1113	3.30573	0.472725	3.0172	0.912717	2495.5	62.4327	2613.07	31.0082	2706.18	22.292	2706.18	22.292	7.7853	2.42888		2706.18	28.9733
17-18	204	135.829	46904.6	1.38649	5.37673	1.50389	12.9293	2.12387	0.504405	1.49972	0.706126	2632.7	32.4149	2674.51	20.0179	2706.98	24.8185	2706.98	24.8185	2.74392	1.49298		2706.98	30.899
17-18	319	208.117	86320.4	0.446623	5.3696	1.17305	13.3801	1.70711	0.521301	1.24023	0.726511	2704.7	27.3965	2706.85	16.1286	2709.17	19.3545	2709.17	19.3545	0.165072	1.23747		2709.17	26.8406
17-18	587	315.204	75276.2	0.0894327	5.36514	1.2782	13.3843	1.97562	0.521032	1.50642	0.762504	2703.56	33.2653	2707.15	18.6661	2710.54	21.0867	2710.54	21.0867	0.257746	1.45198		2710.54	28.0783
17-18	441	150.007	74528.4	0.768939	5.3193	1.41078	12.8277	1.90309	0.495098	1.27729	0.671164	2592.7	27.2665	2667.08	17.9267	2724.69	23.2362	2724.69	23.2362	4.84423	1.28839		2724.69	29.6667
17-18	370	218.595	47224.9	0.252658	5.30324	1.32538	12.238	2.34795	0.470911	1.9381	0.825444	2487.55	39.999	2622.83	22.0407	2729.67	21.8193	2729.67	21.8193	8.86975	1.63642		2729.67	28.5973
17-18	585	185.427	105589	0.195566	5.30313	1.37422	13.7242	2.03801	0.528087	1.50499	0.738462	2733.39	33.5283	2730.86	19.2888	2729.7	22.6235	2729.7	22.6235	-0.134996	1.48237		2729.7	29.1974
17-18	442	267.981	75259.6	0.596	5.29589	1.26787	13.779	1.97854	0.529475	1.51891	0.767696	2739.24	33.8966	2734.64	18.7309	2731.95	20.8679	2731.95	20.8679	-0.266792	1.45809		2731.95	27.8963
17-18	154	207.141	85661.7	0.572461	5.28881	1.40178	13.5651	2.01936	0.520559	1.45355	0.71981	2701.55	32.0787	2719.84	19.097	2734.15	23.068	2734.15	23.068	1.19229	1.43927		2734.15	29.5273
17-18	321	159.266	54175	0.611533	5.28681	1.23178	13.7921	1.79339	0.52907	1.30344	0.726802	2737.53	29.0734	2735.54	16.9791	2734.77	20.2685	2734.77	20.2685	-0.100848	1.29637		2734.77	27.4597
17-18	44	41.0611	18475.1	1.19253	5.28197	2.65246	14.1201	3.15525	0.541154	1.70882	0.541579	2788.28	38.6803	2757.8	29.9211	2736.27	43.6487	2736.27	43.6487	-1.90046	2.15419		2736.27	46.803
17-18	289	119.495	28950.3	1.09033	5.26596	1.53938	13.8576	2.04107	0.529485	1.34025	0.65664	2739.28	29.9097	2740.02	19.3303	2741.27	25.3168	2741.27	25.3168	0.0725917	1.42904		2741.27	31.2594
17-18	429	204.79	78729.3	0.373066	5.24611	1.14834	13.7508	3.00894	0.523424	2.7812	0.92431	2713.69	61.6007	2732.7	28.4829	2747.48	18.8801	2747.48	18.8801	1.23005	2.34256		2747.48	26.4639
17-18	295	66.8089	18583.5	0.816866	5.24451	1.53962	13.6915	2.0286	0.521006	1.32091	0.651144	2703.45	29.1679	2728.61	19.1966	2747.98	25.312	2747.98	25.312	1.62068	1.39564		2747.98	31.242
17-18	165	682.197	201605	0.320982	5.19603	1.36952	13.7324	2.07878	0.517734	1.56389	0.752311	2689.56	34.3903	2731.43	19.6754	2763.24	22.4833	2763.24	22.4833	2.66638	1.47518		2763.24	29.0514
17-18	271	46.9067	13070.1	0.4503	5.1867	3.51192	12.8586	8.25405	0.483918	7.46966	0.904969	2544.31	157.037	2669.34	77.8007	2766.19	57.6373	2766.19	57.6373	8.02112	5.99179		2766.19	59.3908
17-18	137	123.191	39607	0.328307	5.16623	1.61629	14.3672	2.3359	0.538558	1.68642	0.721958	2777.41	38.0543	2774.26	22.1758	2772.68	26.5047	2772.68	26.5047	-0.170695	1.6735		2772.68	32.1625
17-18	280	144.664	56832.2	0.367447	5.15157	1.43757	14.6234	2.12191	0.546609	1.56073	0.735531	2811.05	35.5585	2791.06	20.1671	2777.34	23.5631	2777.34	23.5631	-1.21403	1.54161		2777.34	29.8581
17-18	342	99.2509	19278.9	0.430263	5.14385	1.82377	14.0454	2.73884	0.524216	2.04331	0.746048	2717.04	45.302	2752.78	25.9628	2779.8	29.8889	2779.8	29.8889	2.25776	1.93917		2779.8	34.9022
17-18	469	121.518	2718.3	0.557764	5.14063	4.7611	14.2689	5.0634	0.532222	1.72336	0.340357	2750.81	38.5893	2767.75	48.0547	2780.82	78.0422	2780.82	78.0422	1.07936	3.10366		2780.82	78.0924
17-18	124	40.2151	8546.59	0.297225	5.1307	2.41803	14.1962	4.7053	0.528489	4.03646	0.857853	2735.08	89.9704	2762.9	44.64	2783.99	39.6159	2783.99	39.6159	1.75661	3.52113		2783.99	43.211
17-18	189	157.92	38686.6	0.424819	5.12051	1.23636	12.7517	2.40099	0.473773	2.0582	0.857229	2500.08	42.6528	2661.49	22.6074	2787.24	20.246	2787.24	20.246	10.3026	1.66321		2787.24	27.3884
17-18	385	201.935	53587.4	0.718021	5.09531	1.56127	14.3571	2.47983	0.530792	1.92665	0.77693	2744.79	43.0657	2773.6	23.5412	2795.32	25.5501	2795.32	25.5501	1.80774	1.783		2795.32	31.3865
17-18	235	100.357	29139.8	0.453242	5.09516	1.38975	14.6922	2.04645	0.543167	1.50219	0.734044	2796.69	34.085	2795.52	19.4557	2795.37	22.7494	2795.37	22.7494	-0.0473297	1.46619		2795.37	29.2186
17-18	255	71.8897	25440.5	0.23361	5.07224	1.9632	14.6097	4.46824	0.537687	4.01385	0.898307	2773.76	90.4792	2790.17	42.4695	2802.75	32.115	2802.75	32.115	1.03421	3.42161		2802.75	36.7345
17-18	57	85.2247	22275.3	0.47447	5.06352	1.61715	15.2227	2.29944	0.559285	1.63469	0.71091	2863.67	37.7975	2829.28	21.9097	2805.56	26.4471	2805.56	26.4471	-2.07134	1.65555		2805.56	32.0803
17-18	405	52.6102	14964.9	0.871597	5.05835	1.87345	14.1753	2.49004	0.520269	1.64026	0.65873	2700.32	36.186	2761.5	23.6184	2807.23	30.6341	2807.23	30.6341	3.80837	1.66237		2807.23	35.4916
17-18	41	95.6521	30958.2	0.73889	5.04086	1.56854	14.2534	5.23487	0.521326	4.99435	0.954055	2704.8	110.33	2766.72	49.6792	2812.89	25.6347	2812.89	25.6347	3.84267	4.01901		2812.89	31.428
17-18	555	122.825	48083.8	0.423145	5.03262	1.37123	14.1909	2.03265	0.518195	1.50046	0.738181	2691.52	33.0149	2762.55	19.2811	2815.57	22.4045	2815.57	22.4045	4.40578	1.39771		2815.57	28.9346
17-18	143	24.5394	9217.52	0.446544	5.00681	4.49458	14.4836	5.27251	0.526169	2.75647	0.5228	2725.29	61.2628	2781.93	50.0887	2823.97	73.3847	2823.97	73.3847	3.49423	3.31595		2823.97	73.7899
17-18	456	122.917	50440	0.248855	4.97514	1.68878	13.8098	4.56357	0.498518	4.2396	0.929009	2607.42	90.922	2736.75	43.2154	2834.31	27.5398	2834.31	27.5398	8.00503	3.33011		2834.31	32.939
17-18	241	143.361	43849.7	0.632924	4.92753	1.56585	15.6877	2.27044	0.560889	1.64409	0.724128	2870.3	38.0846	2857.97	21.673	2849.99	25.5062	2849.99	25.5062	-0.712725	1.61187		2849.99	31.2913
17-18	458	150.966	61509.1	0.651833	4.89536	1.31065	15.7157	1.99378	0.558222	1.50245	0.75357	2859.28	34.6975	2859.67	19.034	2860.65	21.3285	2860.65	21.3285	0.0480632	1.42357		2860.65	28.0854
17-18	507	101.549	43118.5	0.446472	4.88015	1.37428	15.8857	2.01679	0.562506	1.47608	0.731894	2876.98	34.2558	2869.95	19.266	2865.71	22.3538	2865.71	22.3538	-0.393041	1.42904		2865.71	28.8429
17-18	416	75.6858	26440.5	0.387573	4.87477	1.26735	15.4975	1.7178	0.548155	1.15959	0.675045	2817.49	26.4674	2846.33	16.3853	2867.51	20.6112	2867.51	20.6112	1.74415	1.16221		2867.51	27.5519
17-18	486	88.25	22487.8	0.344823	4.68275	1.61461	14.1458	5.99897	0.480637	5.7776	0.963099	2530.04	120.906	2759.53	56.9057	2932.67	26.1017	2932.67	26.1017	13.7292	4.19361		2932.67	31.6864
17-18	8	47.1276	12611.3	0.487199	4.66791	2.02603	16.6601	2.60078	0.564271	1.63072	0.627014	2884.25	37.9206	2915.48	24.9138	2937.79	32.7406	2937.79	32.7406	1.82245	1.69213		2937.79	37.1607
17-18	576	45.3427	13192.6	0.766461	4.63886	2.28955	17.4389	2.85342	0.586972	1.70292	0.596801	2977.13	40.6034	2959.29	27.4035	2947.88	36.9684	2947.88	36.9684	-0.992333	1.87115		2947.88	40.7797
17-18	478	29.8053	8115.8	0.477323	4.49186	2.39308	18.8284	2.89009	0.613661	1.62044	0.560688	3084.64	39.7255	3033.07	27.8673	2999.76	38.4687	2999.76	38.4687	-2.82976	1.86887		2999.76	42.0514
17-18	110	98.5439	34836.7	0.0866749	4.08723	1.49246	21.0313	2.06723	0.623711	1.43039	0.691934	3124.67	35.42	3140.04	20.0383	3150.56	23.6878	3150.56	23.6878	0.821775	1.34906		3150.56	29.589
17-18	26	73.4768	25115.8	0.457055	3.31897	1.15472	29.3205	1.72032	0.706094	1.2752	0.741257	3443.72	34.0218	3464.31	16.8921	3476.9	17.8828	3476.9	17.8828	0.954412	1.10317		3476.9	24.999
17-18	353	76.6583	1907.85	0.613084	3.1977	2.31561	30.6237	3.11357	0.71053	2.0814	0.668494	3460.46	55.7351	3507.04	30.6172	3534.41	35.7005	3534.41	35.7005	2.0924	1.86138		3534.41	39.3036
Analyses with >10% discordance; >5% reverse discordance; >10% for >700 Ma and 25%/50% for <700 Ma 2s uncertainty (1200 Ma cutoff for 206Pb/238U versus 207Pb/206Pb age)
17-18	495	12.5789	159.212	-0.0206836	3.09502	37.2842	0.558042	99.6258	0.0125319	92.3861	0.927331	80.2839	73.712	450.251	366.237	3584.65	578.774	80.2839	73.712	97.7603	2.08788		80.2839	73.2986
17-18	557	219.142	5403.4	0.173108	17.9457	8.8019	0.515197	8.95827	0.0670843	1.66646	0.186024	418.566	6.75359	421.938	30.9308	441.353	195.855	418.566	6.75359	5.16299	42.1126		418.566	8.18523
17-18	380	246.216	10388.9	0.423298	17.2451	6.85249	0.617561	7.03106	0.0772738	1.57454	0.22394	479.83	7.28077	488.318	27.2581	529.316	150.145	479.83	7.28077	9.34901	25.7507		479.83	8.99171
17-18	212	569.883	24850.9	0.269608	18.4036	2.48784	0.582721	2.90039	0.0778129	1.49094	0.514048	483.055	6.93882	466.209	10.8429	385.03	55.8918	483.055	6.93882	-25.4591	18.3009		483.055	8.73846
17-18	207	429.197	21058	0.462224	17.7718	6.11159	0.604805	6.32928	0.077989	1.64569	0.260012	484.108	7.67513	480.278	24.2213	463.022	135.514	484.108	7.67513	-4.55416	30.645		484.108	9.33902
17-18	581	75.1894	4133.42	0.15971	13.7322	11.7207	0.785416	12.0646	0.0782578	2.86006	0.237062	485.715	13.3813	588.568	53.902	1008.97	237.89	485.715	13.3813	51.8604	11.4273		485.715	14.3949
17-18	548	195.953	8226.18	0.341003	16.7784	9.28477	0.643869	9.44207	0.0783855	1.71634	0.181776	486.479	8.04236	504.699	37.5558	589.105	201.473	486.479	8.04236	17.4207	28.2749		486.479	9.65633
17-18	434	293.253	13181.3	0.402682	18.3518	6.47381	0.59159	6.70034	0.078775	1.72751	0.257824	488.806	8.13196	471.883	25.2894	391.353	145.305	488.806	8.13196	-24.9015	46.421		488.806	9.74449
17-18	327	432.489	27638	0.329277	17.9065	5.90553	0.607524	6.09003	0.0789338	1.48769	0.244283	489.756	7.01614	481.998	23.3709	446.212	131.323	489.756	7.01614	-9.75858	32.3408		489.756	8.84292
17-18	139	639.204	1059.38	0.352072	17.902	50.9065	0.609509	50.9873	0.0791716	2.86976	0.0562838	491.176	13.572	483.25	196.668	446.774	NA	491.176	13.572	-9.93848	NA		491.176	14.593
17-18	514	208.15	10018.8	0.343291	17.157	8.84056	0.636395	9.05672	0.0792238	1.96688	0.217174	491.488	9.30766	500.072	35.7671	540.502	193.462	491.488	9.30766	9.06814	32.5929		491.488	10.7571
17-18	379	90.6858	3905.24	0.340489	15.5088	18.3663	0.709846	18.5247	0.0798786	2.41783	0.130519	495.398	11.5292	544.655	78.1273	757.374	388.187	495.398	11.5292	34.59	33.56		495.398	12.7408
17-18	138	359.481	941.968	0.593734	17.2453	53.9456	0.641546	53.999	0.080276	2.40028	0.0444504	497.77	11.4982	503.263	215.085	529.289	NA	497.77	11.4982	5.95489	NA		497.77	12.7236
17-18	553	252.432	11164.1	0.346262	18.9702	7.47836	0.583518	7.65642	0.0803184	1.6416	0.214408	498.023	7.8677	466.72	28.6494	316.492	170.103	498.023	7.8677	-57.3572	84.6106		498.023	9.58094
17-18	93	303.137	16626.7	0.876921	17.1146	6.59566	0.647558	6.76648	0.0804143	1.51081	0.223278	498.595	7.24886	506.975	27.0057	545.887	144.107	498.595	7.24886	8.66324	24.1482		498.595	9.0844
17-18	79	374.531	12249.2	0.492853	17.683	5.83898	0.628363	6.00041	0.080622	1.38251	0.230402	499.834	6.64913	495.075	23.512	474.11	129.178	499.834	6.64913	-5.42593	28.759		499.834	8.62277
17-18	511	150.99	10801.6	0.390998	17.6594	11.4955	0.634319	11.6611	0.0812776	1.95825	0.16793	503.744	9.489	498.783	45.9637	477.035	254.33	503.744	9.489	-5.59903	56.335		503.744	10.9787
17-18	225	250.24	11229.3	0.457309	18.0847	6.20118	0.621074	6.36342	0.0814972	1.42776	0.224371	505.053	6.93573	490.52	24.7561	424.164	138.392	505.053	6.93573	-19.0702	38.8834		505.053	8.87955
17-18	565	1381.18	52877.2	0.0592489	15.9173	1.68265	0.706247	2.51293	0.0815671	1.86642	0.742725	505.47	9.07378	542.515	10.5616	702.316	35.7773	505.47	9.07378	28.0282	3.88736		505.47	10.6323
17-18	132	119.854	5318.08	0.409337	15.4671	11.0482	0.728454	11.2144	0.0817518	1.92341	0.171513	506.571	9.37043	555.645	47.9988	763.062	233.019	506.571	9.37043	33.6135	20.3099		506.571	10.8919
17-18	37	659.794	4751.62	1.07432	17.7138	10.9534	0.637889	11.21	0.0819868	2.38476	0.212735	507.971	11.6489	500.998	44.3368	470.217	242.605	507.971	11.6489	-8.02902	55.7918		507.971	12.9057
17-18	519	90.0225	4878.27	0.333479	14.1093	11.0345	0.804677	11.259	0.0823785	2.23713	0.198696	510.304	10.976	599.464	50.9852	953.826	225.846	510.304	10.976	46.4992	12.72		510.304	12.3147
17-18	500	402.063	19715.8	0.169705	18.5099	4.83405	0.613865	5.01666	0.0824451	1.34121	0.26735	510.701	6.58525	485.995	19.376	372.077	108.86	510.701	6.58525	-37.2568	40.1966		510.701	8.64769
17-18	131	235.318	11467.3	0.519702	16.747	8.66452	0.682632	8.80469	0.0829489	1.56486	0.17773	513.7	7.72674	528.364	36.2734	593.184	187.89	513.7	7.72674	13.3995	27.4614		513.7	9.56247
17-18	431	349.048	2138.99	0.440122	17.9074	12.2947	0.640829	12.4828	0.0832651	2.1588	0.172942	515.583	10.6969	502.819	49.5116	446.099	273.522	515.583	10.6969	-15.5758	70.9048		515.583	12.0933
17-18	118	249.401	14650.4	0.668472	18.2694	6.89509	0.628276	7.05523	0.0832839	1.49467	0.211853	515.694	7.40769	495.021	27.6433	401.453	154.472	515.694	7.40769	-28.4569	49.4623		515.694	9.31989
17-18	47	136.761	5921.4	0.757555	16.9448	13.7208	0.678878	13.9167	0.0834672	2.32682	0.167196	516.785	11.5553	526.096	57.1551	567.677	299.006	516.785	11.5553	8.96492	47.9931		516.785	12.8622
17-18	249	151.423	7494.05	0.444758	16.2429	9.91219	0.71053	10.086	0.08374	1.86453	0.184863	518.408	9.28745	545.061	42.5467	659.072	212.589	518.408	9.28745	21.3427	25.4107		518.408	10.8855
17-18	156	154.387	4918.35	0.521094	15.3773	9.97445	0.751391	10.1423	0.0838369	1.83751	0.181173	518.984	9.1626	569.031	44.1894	775.31	209.943	518.984	9.1626	33.0611	18.1646		518.984	10.7826
17-18	559	676.745	26800.3	0.0373404	14.3162	3.18437	0.810031	4.79107	0.084143	3.57968	0.747157	520.805	17.9099	602.471	21.7718	923.99	65.3966	520.805	17.9099	43.6352	4.43526		520.805	18.774
17-18	141	298.315	940.309	0.802437	17.4	47.9768	0.671948	48.0202	0.0848343	2.04102	0.0425033	524.914	10.289	521.896	196.571	509.645	1068.75	524.914	10.289	-2.99593	215.996		524.914	11.7828
17-18	303	80.6744	3739.54	0.450154	14.9118	15.2055	0.784307	15.3024	0.0848605	1.71929	0.112354	525.069	8.66961	587.938	68.3234	839.642	316.979	525.069	8.66961	37.4651	23.6305		525.069	10.4034
17-18	374	168.221	8320.01	0.283566	17.4662	6.34019	0.673254	6.60451	0.0853226	1.84976	0.280075	527.815	9.37428	522.689	26.9844	501.334	139.634	527.815	9.37428	-5.28196	29.3833		527.815	11.0112
17-18	366	151.466	9168.36	0.540351	17.2041	10.1527	0.685938	10.3309	0.085626	1.91035	0.184916	529.617	9.71305	530.357	42.685	534.517	222.43	529.617	9.71305	0.916851	41.2717		529.617	11.31
17-18	499	136.316	7237.63	0.407998	16.2558	8.6831	0.733361	9.29404	0.0864994	3.31405	0.356578	534.801	17.0083	558.524	39.9318	657.368	186.29	534.801	17.0083	18.6452	23.1997		534.801	17.9671
17-18	445	76.2244	3759.14	0.48825	13.542	18.0181	0.887332	18.2727	0.087188	3.0393	0.16633	538.885	15.7124	644.935	87.2844	1037.2	364.565	538.885	15.7124	48.0441	18.3247		538.885	16.7657
17-18	66	243.619	12569.6	0.589073	17.9856	5.329	0.673126	5.5399	0.0878435	1.51401	0.273291	542.77	7.88114	522.611	22.6317	436.409	118.68	542.77	7.88114	-24.372	33.8706		542.77	9.86858
17-18	305	109.355	7848.89	0.288977	12.1135	12.9288	1.14278	13.5085	0.100443	3.91502	0.289819	617.005	23.0359	773.825	73.1829	1258.67	252.991	617.005	23.0359	50.9796	10.0216		617.005	23.9536
17-18	50	253.122	7281.17	1.02376	18.4104	8.0098	0.753692	8.33886	0.100681	2.3194	0.278144	618.396	13.6766	570.364	36.3935	384.195	180.004	618.396	13.6766	-60.9591	75.4971		618.396	15.2302
17-18	302	676.144	35231.4	0.149554	15.1605	2.21915	0.925676	3.31468	0.101827	2.46221	0.742819	625.104	14.6687	665.357	16.1792	805.11	46.4738	625.104	14.6687	22.3579	4.83796		625.104	16.1529
17-18	198	1292.65	93190.3	0.0313883	12.1878	1.7352	1.16731	2.43762	0.103228	1.71204	0.702339	633.301	10.3268	785.387	13.3312	1246.72	33.963	633.301	10.3268	49.2025	1.61279		633.301	12.4061
17-18	183	2774.74	90636.3	0.359299	12.5353	2.25663	1.26646	5.07097	0.11519	4.54118	0.895526	702.82	30.2381	830.806	28.7736	1191.44	44.542	702.82	30.2381	41.0108	3.36223		702.82	31.1066
17-18	21	544.112	35095.7	0.0586397	12.0772	2.5042	1.31743	3.02863	0.115446	1.7034	0.562433	704.3	11.3649	853.386	17.4827	1264.52	48.8818	704.3	11.3649	44.3031	2.33309		704.3	13.6734
17-18	31	376.159	33063.4	0.158451	13.9909	2.6962	1.14964	3.8518	0.116707	2.7508	0.714159	711.579	18.5325	777.072	20.9173	971.045	54.9781	711.579	18.5325	26.7202	4.56683		711.579	20.0385
17-18	525	723.649	64494.6	0.0856674	11.715	1.81815	1.43499	2.74331	0.121977	2.05429	0.748835	741.934	14.3971	903.635	16.416	1323.73	35.2146	741.934	14.3971	43.9514	1.84556		741.934	16.4559
17-18	552	65.9863	4248.15	0.471445	16.1309	8.28087	1.09219	13.346	0.127834	10.4663	0.784227	775.497	76.4749	749.569	70.7711	673.841	177.129	775.497	76.4749	-15.0861	32.3108		775.497	76.4735
17-18	14	585.384	36135	0.211393	13.965	2.08162	1.3137	2.49474	0.133114	1.37499	0.551155	805.607	10.4128	851.751	14.383	974.796	42.4353	805.607	10.4128	17.3563	3.75291		805.607	13.5285
17-18	84	251.376	15124.5	0.120926	8.13933	2.42559	2.28069	3.1814	0.134692	2.05859	0.647071	814.578	15.7526	1206.33	22.4578	1998.16	43.0996	814.578	15.7526	59.2336	1.18098		814.578	17.9942
17-18	386	763.978	44885	0.0751765	11.416	2.04771	1.64067	3.53903	0.135902	2.88646	0.815606	821.446	22.2622	985.97	22.3275	1373.62	39.3883	821.446	22.2622	40.1986	2.35948		821.446	23.9008
17-18	461	104.909	7933.33	0.232434	14.7117	11.2088	1.27775	11.8245	0.136395	3.76601	0.318491	824.242	29.1386	835.852	67.3773	867.748	232.516	824.242	29.1386	5.01366	25.6725		824.242	30.3802
17-18	11	372.203	23116.4	0.320587	11.6199	2.32981	1.63234	3.06737	0.137626	1.99518	0.650453	831.226	15.5598	982.762	19.3143	1339.49	45.0281	831.226	15.5598	37.9446	2.38766		831.226	17.9088
17-18	250	502.4	50668.3	0.0824855	13.0644	2.06552	1.53913	2.93321	0.145898	2.08262	0.710015	877.93	17.0936	946.155	18.054	1109.32	41.2791	877.93	17.0936	20.8587	3.32371		877.93	19.4709
17-18	375	389.324	29067.5	0.203687	13.2273	2.7883	1.56502	3.64456	0.150203	2.34695	0.643959	902.102	19.7572	956.455	22.5799	1084.54	55.8756	902.102	19.7572	16.8219	4.65647		902.102	21.9398
17-18	396	419.253	31650.9	0.107532	10.0946	1.56873	2.13211	2.25979	0.156165	1.62657	0.719787	935.431	14.163	1159.27	15.6199	1606.54	29.2458	935.431	14.163	41.7736	1.37866		935.431	17.2889
17-18	29	186.61	19814.6	0.38346	13.9686	5.98347	1.56176	6.13202	0.158291	1.34153	0.218775	947.272	11.8184	955.167	37.963	974.28	122.02	947.272	11.8184	2.77207	12.2372		947.272	15.5099
17-18	97	114.547	10348.1	0.878152	13.867	6.26944	1.59814	6.47896	0.1608	1.63436	0.252257	961.22	14.5947	969.483	40.4711	989.125	127.583	961.22	14.5947	2.8212	12.6212		961.22	17.7872
17-18	318	91.298	11360.4	0.614551	14.4564	6.93255	1.57578	7.22739	0.165289	2.04327	0.282712	986.103	18.6833	960.707	44.9023	903.897	142.93	986.103	18.6833	-9.09463	17.3741		986.103	21.3742
17-18	491	685.535	48545	0.108094	10.4534	1.54402	2.20129	2.86897	0.166964	2.41805	0.84283	995.362	22.3023	1181.45	20.0319	1541.14	29.0356	995.362	22.3023	35.4138	1.89073		995.362	24.6229
17-18	134	136.323	9113.94	0.747128	14.1736	5.57873	1.62964	5.89454	0.167595	1.90349	0.322925	998.845	17.6132	981.721	37.0957	944.492	114.277	998.845	17.6132	-5.75481	12.9308		998.845	20.5139
17-18	459	23.2155	512.046	0.677262	12.2096	62.7315	1.89728	62.883	0.168082	4.3624	0.0693733	1001.53	40.4662	1080.14	424.186	1243.21	1260.17	1001.53	40.4662	19.4395	81.7248		1001.53	41.6978
17-18	213	302.22	24935.2	0.307316	10.6383	2.55456	2.18068	6.0189	0.168326	5.4499	0.905464	1002.88	50.6169	1174.9	41.9065	1508.11	48.2477	1002.88	50.6169	33.5006	3.97379		1002.88	51.5123
17-18	247	372.358	31925	0.189018	10.1473	1.50364	2.31173	2.85871	0.170207	2.43132	0.850494	1013.25	22.7969	1215.89	20.2627	1596.81	28.0708	1013.25	22.7969	36.5453	1.81176		1013.25	25.1428
17-18	218	414.835	27304.7	0.207738	11.3607	1.79533	2.069	3.23539	0.17055	2.69157	0.831915	1015.14	25.2806	1138.6	22.1482	1382.97	34.4898	1015.14	25.2806	26.5967	2.58702		1015.14	27.4088
17-18	472	121.058	13010.4	0.274293	13.925	5.48371	1.69048	5.70977	0.170802	1.59073	0.278598	1016.53	14.9598	1004.95	36.4314	980.636	111.702	1016.53	14.9598	-3.66033	11.9059		1016.53	18.3971
17-18	33	101.358	9065.3	0.374155	14.0585	8.02166	1.70663	8.13703	0.174086	1.3654	0.1678	1034.59	13.0509	1011.02	52.1076	961.211	163.94	1034.59	13.0509	-7.63374	18.4077		1034.59	17.0002
17-18	567	334.349	33470.5	0.411203	11.7761	1.87387	2.04576	2.76421	0.174801	2.0321	0.735148	1038.51	19.4915	1130.88	18.8526	1313.64	36.3492	1038.51	19.4915	20.9438	2.64328		1038.51	22.3264
17-18	530	108.471	8427.43	0.50094	13.3754	5.93028	1.81304	6.15934	0.175955	1.66411	0.270177	1044.84	16.0514	1050.17	40.3137	1062.18	119.351	1044.84	16.0514	1.63243	11.1558		1044.84	19.4458
17-18	464	101.243	13317.2	0.32764	13.7089	6.20281	1.77654	6.41704	0.176712	1.64426	0.256233	1048.99	15.9179	1036.91	41.6962	1012.42	125.758	1048.99	15.9179	-3.61206	12.9659		1048.99	19.3591
17-18	413	78.813	8234.29	0.69092	14.5007	7.25994	1.68352	7.46601	0.177131	1.74202	0.233326	1051.28	16.8982	1002.31	47.5676	897.589	149.833	1051.28	16.8982	-17.1227	19.6415		1051.28	20.1814
17-18	473	139.745	16177.9	0.420509	13.2095	5.72335	1.86013	5.87084	0.178287	1.30769	0.222743	1057.61	12.7553	1067.03	38.774	1087.22	114.774	1057.61	12.7553	2.72346	10.336		1057.61	16.9213
17-18	266	130.918	12363.7	0.649985	13.5764	5.47691	1.81465	5.64543	0.178757	1.36905	0.242506	1060.18	13.3837	1050.76	36.9609	1032.08	110.718	1060.18	13.3837	-2.72332	11.0959		1060.18	17.414
17-18	449	70.661	6393.92	0.760299	12.5734	7.84942	2.018	7.95782	0.184104	1.30903	0.164496	1089.35	13.1202	1121.59	54.0417	1185.45	155.163	1089.35	13.1202	8.10626	12.0787		1089.35	17.397
17-18	508	566.377	58362.4	0.128355	9.66933	1.55522	2.63681	2.53951	0.184996	2.00759	0.790542	1094.21	20.2041	1310.97	18.6961	1686.36	28.7018	1094.21	20.2041	35.1141	1.62942		1094.21	23.2093
17-18	112	77.4838	6634.84	0.261957	13.2147	8.65616	1.9424	8.83648	0.186245	1.77604	0.20099	1101	17.9756	1095.83	59.2474	1086.43	173.632	1101	17.9756	-1.34169	16.2807		1101	21.3432
17-18	226	88.5109	8736.92	0.333374	14.0907	7.42065	1.83185	7.63008	0.187289	1.7754	0.232684	1106.67	18.0538	1056.94	50.1265	956.494	151.76	1106.67	18.0538	-15.7007	18.4542		1106.67	21.4382
17-18	311	248.675	27667.8	0.259453	14.189	2.54041	1.82399	3.03415	0.187786	1.65904	0.54679	1109.37	16.9083	1054.12	19.8995	942.285	52.0235	1109.37	16.9083	-17.7318	6.74311		1109.37	20.5024
17-18	350	565.836	63893.9	0.131413	11.9669	1.91915	2.17204	2.72192	0.188599	1.93021	0.709136	1113.78	19.7436	1172.13	18.9255	1282.39	37.3789	1113.78	19.7436	13.1483	2.96294		1113.78	22.9069
17-18	365	1711.62	108202	0.154732	11.9897	1.37208	2.18557	2.04181	0.190134	1.51208	0.740559	1122.1	15.5724	1176.45	14.2243	1278.69	26.7444	1122.1	15.5724	12.2466	2.20268		1122.1	19.4939
17-18	206	240.77	24474.8	0.238953	6.97074	2.45225	3.80526	7.08124	0.192465	6.64307	0.938123	1134.71	69.1189	1593.86	56.9535	2269.34	42.2757	1134.71	69.1189	49.998	3.18503		1134.71	69.7558
17-18	259	230.724	11686.5	0.122068	10.8933	3.01205	2.46092	5.41856	0.194511	4.50426	0.831265	1145.77	47.2822	1260.63	39.1267	1463.23	57.2354	1145.77	47.2822	21.6958	4.45234		1145.77	48.598
17-18	424	98.2877	12617.7	0.18965	13.8593	5.22382	1.94152	5.48871	0.19524	1.68452	0.306907	1149.7	17.7382	1095.52	36.789	990.304	106.26	1149.7	17.7382	-16.0957	12.5853		1149.7	21.4029
17-18	542	58.5622	5555.93	0.478368	9.6672	6.50833	2.79433	9.30164	0.196004	6.64546	0.71444	1153.82	70.207	1354.02	69.5828	1686.77	120.127	1153.82	70.207	31.596	6.40747		1153.82	70.8472
17-18	264	57.8473	7337.4	0.566213	12.9104	8.12677	2.11795	8.26813	0.198401	1.52235	0.184123	1166.73	16.2471	1154.67	57.0424	1132.96	161.811	1166.73	16.2471	-2.97992	14.7774		1166.73	20.2874
17-18	18	286.422	32225.2	0.417068	10.7612	2.36709	2.54988	2.82648	0.199099	1.54462	0.546484	1170.48	16.5331	1286.4	20.6156	1486.37	44.8394	1170.48	16.5331	21.2523	2.62311		1170.48	20.5373
17-18	227	250.278	30925.5	0.188732	10.7968	2.58375	2.54863	4.91165	0.199659	4.17714	0.850456	1173.49	44.8157	1286.05	35.8218	1480.11	48.985	1173.49	44.8157	20.7162	4.00661		1173.49	46.2975
17-18	346	531.657	50307.2	0.222027	12.6025	1.67544	2.4951	2.41467	0.228155	1.73884	0.720112	1324.82	20.8235	1270.61	17.5036	1180.89	33.1586	1180.89	33.1586	-12.1885	3.61014		1180.89	39.6181
17-18	194	60.8071	7400.39	0.288541	11.8445	7.67533	2.74892	7.94723	0.236248	2.06101	0.259337	1367.16	25.3899	1341.8	59.1868	1302.4	149.164	1302.4	149.164	-4.9727	12.1796		1302.4	143.775
17-18	471	909.809	1382.39	0.221165	11.3183	23.0385	3.38807	31.2539	0.278241	21.1195	0.675739	1582.5	296.406	1501.64	246.226	1390.14	443.557	1390.14	443.557	-13.8372	42.1182		1390.14	388.153
17-18	541	817.863	22703.8	0.199189	10.8679	2.23521	2.67225	4.17903	0.210723	3.53103	0.844939	1232.67	39.6175	1320.82	30.8805	1467.66	42.4474	1467.66	42.4474	16.0114	3.63141		1467.66	46.9986
17-18	78	28.0034	3285.99	0.812633	10.7945	13.3276	2.87344	13.6713	0.225056	3.04632	0.222826	1308.54	36.077	1374.97	103.067	1480.52	252.926	1480.52	252.926	11.6168	15.2943		1480.52	234.361
17-18	537	869.21	145433	0.691883	10.4461	1.36419	4.09874	2.28054	0.310664	1.82752	0.801356	1743.98	27.9243	1654.05	18.6152	1542.46	25.6493	1542.46	25.6493	-13.0648	2.61006		1542.46	33.1746
17-18	62	298.333	38388.5	1.94685	10.197	1.29845	4.18543	2.29924	0.30967	1.8975	0.825275	1739.08	28.9227	1671.17	18.8444	1587.7	24.269	1587.7	24.269	-9.53474	2.47423		1587.7	32.0694
17-18	417	361.049	44068.4	0.932467	10.1235	1.46778	3.2001	4.89305	0.235062	4.66771	0.953948	1360.98	57.269	1457.18	37.8585	1601.19	27.3858	1601.19	27.3858	15.0023	3.8608		1601.19	34.3888
17-18	428	381.695	24384.7	0.326144	9.98037	1.68655	2.85706	2.7388	0.206897	2.15791	0.787902	1212.26	23.847	1370.67	20.6	1627.72	31.3568	1627.72	31.3568	25.5238	2.05057		1627.72	37.4817
17-18	520	319.724	52969.4	0.0688953	9.74812	1.79144	2.98548	2.87317	0.211166	2.2463	0.781819	1235.02	25.2468	1403.93	21.8545	1671.37	33.1212	1671.37	33.1212	26.1072	2.1038		1671.37	38.8511
17-18	170	27.5723	7729.12	0.605671	9.61473	12.9046	4.39497	13.0357	0.306606	1.84357	0.141425	1723.98	27.8879	1711.39	107.929	1696.81	238.071	1696.81	238.071	-1.6015	14.3497		1696.81	221.458
17-18	362	457.414	71728.7	0.259912	9.57836	1.51553	3.06438	2.229	0.212972	1.63451	0.733292	1244.63	18.5002	1423.83	17.0647	1703.79	27.9043	1703.79	27.9043	26.9492	1.61568		1703.79	34.6253
17-18	387	558.596	86878.2	0.387559	9.48872	1.68846	3.81976	2.96207	0.262986	2.43371	0.821625	1505.1	32.6679	1596.92	23.8372	1721.08	31.0248	1721.08	31.0248	12.5493	2.46736		1721.08	37.0691
17-18	278	390.943	81155.8	0.230029	9.46654	1.59935	3.86405	2.17544	0.265413	1.47465	0.677866	1517.47	19.9388	1606.21	17.5482	1725.38	29.3714	1725.38	29.3714	12.0499	1.8913		1725.38	35.7398
17-18	593	497.204	47615.9	0.182385	9.44546	1.3868	3.34113	2.09178	0.228983	1.56599	0.748642	1329.17	18.809	1490.72	16.3473	1729.47	25.4512	1729.47	25.4512	23.1461	1.56905		1729.47	32.7009
17-18	193	279.608	37527.5	0.257341	9.39366	2.15886	3.28368	3.19717	0.223812	2.35822	0.737598	1301.99	27.8018	1477.19	24.8863	1739.56	39.5733	1739.56	39.5733	25.1544	2.33523		1739.56	44.1763
17-18	70	363.495	78640.5	0.0347978	9.36453	1.46011	3.61656	3.18713	0.245737	2.833	0.888888	1416.45	36.0255	1553.18	25.353	1745.25	26.7442	1745.25	26.7442	18.8396	2.40992		1745.25	33.661
17-18	111	162.352	32493.4	1.02695	9.32312	2.13708	3.68062	3.95872	0.248983	3.33232	0.841767	1433.23	42.8233	1567.17	31.6109	1753.36	39.1067	1753.36	39.1067	18.2583	3.04778		1753.36	43.762
17-18	430	35.6676	8164.02	0.600878	9.24724	5.1421	5.33986	5.39258	0.358286	1.62441	0.301231	1974.04	27.6219	1875.27	46.1266	1768.31	93.936	1768.31	93.936	-11.6347	6.13254		1768.31	93.2614
17-18	422	541.867	68505.6	0.293742	9.23175	1.3072	3.92266	1.93122	0.262756	1.42156	0.736095	1503.93	19.0686	1618.37	15.6261	1771.37	23.8653	1771.37	23.8653	15.098	1.57075		1771.37	31.4491
17-18	470	463.436	74695.8	0.395902	9.20402	1.56147	3.59972	5.49784	0.2404	5.27144	0.95882	1388.77	65.8602	1549.47	43.6944	1776.86	28.4889	1776.86	28.4889	21.841	3.91266		1776.86	34.9656
17-18	395	13.0084	1659.44	0.0378745	9.18389	28.0986	4.67798	28.5596	0.311725	5.11048	0.178941	1749.19	78.2915	1763.31	240.028	1780.85	515.044	1780.85	515.044	1.77764	28.7453		1780.85	440.254
17-18	147	28.7757	5233.17	9.68721	9.16965	12.1881	3.77548	12.8689	0.251196	4.13029	0.32095	1444.64	53.4551	1587.55	103.396	1783.68	222.4	1783.68	222.4	19.0077	10.5339		1783.68	207.912
17-18	591	107.112	13324.9	0.174822	9.16038	3.24068	3.87312	5.55581	0.257432	4.51276	0.812259	1476.69	59.558	1608.1	44.8437	1785.52	59.0698	1785.52	59.0698	17.2966	4.31419		1785.52	61.3952
17-18	285	594.754	103951	0.175405	9.00887	1.51606	3.83753	2.38932	0.250848	1.84674	0.772912	1442.85	23.8742	1600.65	19.2462	1815.87	27.5278	1815.87	27.5278	20.5422	1.78312		1815.87	34.1535
17-18	182	185.569	29239.2	0.909052	9.00206	1.59469	5.42917	2.14824	0.35462	1.43942	0.670044	1956.62	24.2913	1889.47	18.4206	1817.24	28.951	1817.24	28.951	-7.6702	2.17467		1817.24	35.2731
17-18	390	387.958	69498.9	0.335609	8.95257	1.45629	4.28127	2.46598	0.278105	1.99004	0.806999	1581.81	27.914	1689.77	20.2987	1827.24	26.4058	1827.24	26.4058	13.4317	1.97454		1827.24	33.2706
17-18	292	305.674	39559.2	0.355577	8.6636	1.81034	4.29516	3.63412	0.270001	3.1511	0.86709	1540.81	43.1861	1692.43	29.9337	1886.52	32.5922	1886.52	32.5922	18.3253	2.68914		1886.52	38.1159
17-18	337	426.47	17926.2	0.314333	7.8599	2.11874	5.58506	3.50472	0.318517	2.79178	0.796575	1782.48	43.4758	1913.8	30.1845	2060.01	37.3796	2060.01	37.3796	13.472	2.63044		2060.01	41.9265
17-18	192	275.289	46149.5	0.305039	7.22727	2.16058	4.66949	3.84703	0.244868	3.18301	0.827393	1411.95	40.3613	1761.79	32.1749	2206.83	37.4989	2206.83	37.4989	36.0189	2.12766		2206.83	41.8737
17-18	398	156.401	26288.4	0.236727	6.53864	2.04958	7.61592	4.44352	0.361325	3.9426	0.887269	1988.45	67.4592	2186.74	39.8872	2379.02	34.9271	2379.02	34.9271	16.4171	3.08972		2379.02	39.5043
17-18	129	220.725	33288.5	0.283564	6.50728	1.6852	5.95648	2.68952	0.28124	2.09609	0.779356	1597.6	29.6603	1969.51	23.3843	2387.2	28.6923	2387.2	28.6923	33.0763	1.48012		2387.2	34.3286
17-18	536	293.006	43766.8	0.204083	6.2864	1.40829	6.04105	6.62953	0.275551	6.47822	0.977177	1568.92	90.2164	1981.78	57.7703	2445.82	23.8386	2445.82	23.8386	35.8532	3.7412		2445.82	30.446
17-18	65	152.769	18170.7	0.304455	6.27991	1.87458	5.367	3.22675	0.244553	2.62638	0.813939	1410.32	33.2687	1879.6	27.6197	2447.57	31.7263	2447.57	31.7263	42.3787	1.55095		2447.57	36.7429
17-18	421	188.549	44614.9	0.224867	6.25706	1.59016	7.65655	3.60052	0.347609	3.23035	0.897188	1923.17	53.7152	2191.52	32.3385	2453.74	26.8899	2453.74	26.8899	21.6228	2.35159		2453.74	32.8085
17-18	492	198.706	25995.1	0.369792	5.95924	1.48293	6.20352	3.81915	0.268236	3.51949	0.921539	1531.84	47.9863	2004.94	33.3987	2535.87	24.8771	2535.87	24.8771	39.5932	1.98292		2535.87	31.1336
17-18	251	224.615	47111.3	0.47616	5.93211	1.51417	8.8855	2.60321	0.382454	2.11754	0.813434	2087.74	37.7641	2326.31	23.7597	2543.52	25.3762	2543.52	25.3762	17.9195	1.69558		2543.52	31.516
17-18	76	230.018	79598.7	0.096477	5.81182	1.3788	9.81734	4.23821	0.413994	4.00766	0.945602	2233.16	75.6415	2417.78	39.0606	2577.8	23.0356	2577.8	23.0356	13.3696	3.03475		2577.8	29.679
17-18	436	1044.02	253968	0.123541	5.80473	1.32853	10.0488	1.91197	0.423237	1.375	0.719153	2275.16	26.3589	2439.27	17.6571	2579.84	22.1913	2579.84	22.1913	11.8101	1.27255		2579.84	29.0457
17-18	389	200.577	57320.3	0.52886	5.79198	1.48034	10.0582	2.27416	0.422701	1.72639	0.759132	2272.73	33.0657	2440.14	21.004	2583.51	24.7181	2583.51	24.7181	12.0294	1.53183		2583.51	30.9557
17-18	462	261.692	53702.2	0.295803	5.6735	1.53536	7.80869	2.53687	0.321452	2.0195	0.796059	1796.82	31.6685	2209.21	22.8356	2617.96	25.5523	2617.96	25.5523	31.3657	1.38277		2617.96	31.5675
17-18	338	220.964	16400.3	0.0714602	5.63963	2.26754	5.08917	4.3427	0.20825	3.70369	0.852853	1219.49	41.1512	1834.3	36.8575	2627.92	37.6957	2627.92	37.6957	53.5948	1.70153		2627.92	41.6551
17-18	359	201.271	34171.4	0.513311	5.593	1.50637	10.3702	3.43516	0.420843	3.08725	0.898723	2264.3	58.9478	2468.39	31.8149	2641.71	25.0064	2641.71	25.0064	14.2865	2.37435		2641.71	31.1175
17-18	333	648.669	42654.7	0.415333	5.58361	2.82986	9.32142	10.8986	0.377646	10.5248	0.965702	2065.28	185.999	2370.13	100.022	2644.5	46.9719	2644.5	46.9719	21.9027	7.16894		2644.5	49.8289
17-18	46	360.163	169736	0.410547	5.44285	1.45127	10.3439	2.3234	0.408505	1.81439	0.780919	2208.08	33.9225	2466.04	21.5125	2686.8	23.9887	2686.8	23.9887	17.8173	1.4603		2686.8	30.2815
17-18	298	160.492	28988.8	0.556132	5.34598	1.30345	11.3769	3.99107	0.441307	3.77222	0.945166	2356.49	74.4568	2554.54	37.2546	2716.44	21.4913	2716.44	21.4913	13.2509	2.82559		2716.44	28.367
17-18	277	387.1	77801.4	0.161352	5.3144	1.37042	8.24369	2.53878	0.31788	2.13714	0.841798	1779.37	33.2307	2258.15	22.9906	2726.2	22.5681	2726.2	22.5681	34.7309	1.33332		2726.2	29.1602
17-18	125	257.368	44389.8	0.412433	5.21606	1.07691	10.7727	2.71937	0.407712	2.49704	0.918244	2204.45	46.6214	2503.71	25.2679	2756.92	17.69	2756.92	17.69	20.0394	1.76719		2756.92	25.6381
17-18	568	176.439	10067.6	0.751704	5.20926	1.74314	11.243	2.54809	0.424957	1.85855	0.72939	2282.95	35.7303	2543.49	23.7607	2759.07	28.6285	2759.07	28.6285	17.2566	1.55377		2759.07	33.8841
17-18	583	73.8159	26723.4	0.293125	5.11966	1.78142	15.8486	2.44349	0.588733	1.67248	0.684462	2984.28	39.9528	2867.71	23.3393	2787.52	29.1744	2787.52	29.1744	-7.05887	1.81928		2787.52	34.3128
17-18	485	359.321	106258	0.570681	5.10552	1.32251	11.4398	3.70925	0.423785	3.46547	0.934279	2277.64	66.4945	2559.68	34.6388	2792.04	21.648	2792.04	21.648	18.4239	2.46413		2792.04	28.4048
17-18	308	161.816	40807.4	0.637494	5.08575	1.2563	11.0407	2.16085	0.407417	1.75811	0.813623	2203.1	32.8082	2526.57	20.1193	2798.39	20.5591	2798.39	20.5591	21.2727	1.3073		2798.39	27.5943
17-18	382	176.385	36303.1	0.389422	5.01756	1.97061	11.0775	6.59467	0.403293	6.29335	0.95431	2184.18	116.596	2529.67	61.4355	2820.46	32.1768	2820.46	32.1768	22.5594	4.22729		2820.46	36.7755
17-18	527	77.0006	28393.9	0.274816	4.89672	1.63676	17.4467	2.35182	0.619879	1.68881	0.718085	3109.44	41.6605	2959.73	22.5864	2860.2	26.6368	2860.2	26.6368	-8.71403	1.77387		2860.2	32.1784
17-18	329	125.413	33253.3	0.378077	4.70793	3.04341	12.5557	15.3315	0.428903	15.0264	0.980099	2300.77	290.806	2646.91	144.433	2923.99	49.2461	2923.99	49.2461	21.3141	10.0334		2923.99	51.688
Sample 17-20			(Analyzed October_28_2020; 600/hr; 30 µm spot)
			Systematic errors (2σ): 206Pb/238U=	0.872409
			206Pb/207Pb=	1.88886
17-20	29	517.439	22265	0.438949	14.2386	2.19232	1.39176	3.58686	0.143788	2.83889	0.79147	866.045	23.0061	885.445	21.1937	935.145	44.969	866.045	23.0061	7.38922	5.08779		866.045	24.0231
17-20	4	265.453	12506.2	0.219166	14.3043	4.27848	1.39983	5.06147	0.145288	2.70427	0.534285	874.495	22.1148	888.863	29.9801	925.669	87.8701	874.495	22.1148	5.52824	9.28061		874.495	23.1953
17-20	109	1053.84	58568	0.0640898	14.1755	1.75771	1.41831	2.44889	0.145881	1.70514	0.696292	877.833	13.9939	896.655	14.5837	944.231	36.0046	877.833	13.9939	7.03196	3.84231		877.833	15.7
17-20	341	500.249	15790.8	0.143818	14.586	3.71874	1.41626	4.06932	0.149887	1.65236	0.406053	900.332	13.8846	895.791	24.2198	885.481	76.9164	900.332	13.8846	-1.67718	8.97019		900.332	15.6819
17-20	124	470.722	22778.8	0.20904	14.2638	2.29816	1.46286	2.61692	0.151401	1.2517	0.47831	908.81	10.6101	915.19	15.7831	931.483	47.1667	908.81	10.6101	2.4341	5.06997		908.81	12.92
17-20	23	473.182	31225.6	0.12929	14.2602	2.23366	1.48192	2.96862	0.153334	1.95537	0.65868	919.625	16.7583	923.018	17.9984	932.05	45.8398	919.625	16.7583	1.33316	5.17499		919.625	18.3245
17-20	577	2268.12	42591.7	0.0600867	13.908	2.51879	1.52932	2.94942	0.15433	1.53452	0.520279	925.191	13.2255	942.224	18.108	983.157	51.2873	925.191	13.2255	5.89596	5.09		925.191	15.1955
17-20	152	1017.36	61226.6	0.0712897	14.1745	1.86314	1.51488	2.26111	0.155802	1.28114	0.566598	933.406	11.1328	936.413	13.8299	944.379	38.1983	933.406	11.1328	1.1619	4.168		933.406	13.4548
17-20	133	678.421	39515.4	0.463804	14.0742	2.14807	1.52594	2.63235	0.155829	1.52153	0.578012	933.553	13.2237	940.866	16.1472	958.894	43.9147	933.553	13.2237	2.64271	4.66709		933.553	15.2252
17-20	38	441.936	23540.5	0.159156	13.6914	2.19076	1.57721	2.58696	0.156685	1.37583	0.531834	938.328	12.0142	961.273	16.0756	1015	44.3523	938.328	12.0142	7.55387	4.20945		938.328	14.2103
17-20	352	539.406	26581	0.68998	13.6558	4.95422	1.58555	5.19273	0.157103	1.55569	0.299589	940.659	13.6161	964.552	32.3363	1020.28	100.324	940.659	13.6161	7.80373	9.16337		940.659	15.5921
17-20	358	508.871	53485.5	0.281958	14.36	4.07124	1.50851	4.37268	0.157178	1.59543	0.364864	941.077	13.9698	933.838	26.7015	917.709	83.7299	941.077	13.9698	-2.54642	9.47916		941.077	15.9023
17-20	63	425.488	15699.6	0.0544693	14.1643	4.02827	1.53252	4.52143	0.157503	2.05337	0.454143	942.887	18.0117	943.51	27.7834	945.855	82.517	942.887	18.0117	0.313811	8.90273		942.887	19.5403
17-20	211	2186.06	17237.3	0.127212	14.0394	2.31987	1.54675	2.89257	0.157563	1.72777	0.597312	943.222	15.1605	949.199	17.8385	963.995	47.3512	943.222	15.1605	2.15488	5.0569		943.222	16.9612
17-20	338	1171.61	58926.4	0.0638384	13.7943	2.42941	1.5778	2.82671	0.157921	1.44508	0.511223	945.211	12.7048	961.502	17.5681	999.813	49.3282	945.211	12.7048	5.46123	4.83429		945.211	14.8235
17-20	147	1437.01	96534.6	0.0650872	13.9153	1.64383	1.56878	2.07145	0.158396	1.26045	0.608484	947.855	11.1104	957.945	12.8453	982.093	33.4384	947.855	11.1104	3.4862	3.47539		947.855	13.4979
17-20	97	752.997	36482	0.299774	13.9832	1.66679	1.56158	2.13336	0.158438	1.33156	0.624161	948.089	11.7399	955.093	13.2056	972.133	33.9955	948.089	11.7399	2.47337	3.61801		948.089	14.02
17-20	150	405.669	27073.6	0.597185	13.6993	3.33325	1.59742	3.61097	0.158784	1.3887	0.384579	950.018	12.2668	969.203	22.5501	1013.83	67.592	950.018	12.2668	6.29392	6.36349		950.018	14.4703
17-20	42	639.434	42604.4	0.115722	13.9128	1.67621	1.57292	2.25689	0.158785	1.51126	0.669619	950.023	13.3495	959.58	14.0097	982.457	34.0928	950.023	13.3495	3.3014	3.62026		950.023	15.3957
17-20	355	922.21	60203.6	0.0897231	13.9692	3.34552	1.57422	3.75244	0.15956	1.69951	0.452908	954.331	15.0755	960.091	23.3014	974.198	68.1766	954.331	15.0755	2.0393	7.028		954.331	16.9236
17-20	255	560.951	28372.6	0.134302	13.9917	3.60674	1.57277	3.82394	0.15967	1.27041	0.332225	954.942	11.2759	959.519	23.7369	970.924	73.559	954.942	11.2759	1.64609	7.54143		954.942	13.6641
17-20	65	454.052	27625.7	0.165439	14.1537	2.88963	1.55546	3.80975	0.159741	2.48278	0.651692	955.336	22.0451	952.664	23.547	947.371	59.1474	955.336	22.0451	-0.840668	6.71207		955.336	23.3242
17-20	146	352.761	24424	1.4588	14.2413	3.21223	1.54692	3.49626	0.159848	1.38037	0.394812	955.932	12.2636	949.267	21.5627	934.718	65.918	955.932	12.2636	-2.26963	7.3306		955.932	14.4913
17-20	160	524.273	34998.6	0.13679	14.1656	3.0151	1.55553	3.33099	0.159882	1.41588	0.425063	956.123	12.5815	952.693	20.5881	945.669	61.7476	956.123	12.5815	-1.10554	6.73443		956.123	14.7611
17-20	43	788.914	70479.3	0.254365	13.9846	1.58436	1.57611	2.10624	0.159928	1.38783	0.658912	956.378	12.3352	960.837	13.0848	971.924	32.3224	956.378	12.3352	1.59953	3.5099		956.378	14.5535
17-20	354	652.004	46433.5	0.0858194	13.7868	3.05497	1.59983	3.42379	0.160038	1.5458	0.451489	956.989	13.7475	970.143	21.3935	1000.92	62.0124	956.989	13.7475	4.38927	6.08073		956.989	15.7665
17-20	52	1574.56	89162.6	0.0878249	14.0201	1.35966	1.57399	1.8838	0.160118	1.30385	0.69214	957.435	11.6007	960.003	11.6967	966.771	27.7361	957.435	11.6007	0.965673	3.08423		957.435	13.9429
17-20	69	672.233	43360.3	0.0918375	14.009	1.74083	1.57543	2.23108	0.160138	1.39543	0.625449	957.543	12.4168	960.569	13.858	968.389	35.499	957.543	12.4168	1.12001	3.84483		957.543	14.6271
17-20	135	439.811	30626	0.442702	14.2511	2.88126	1.54948	3.15246	0.160223	1.2792	0.405777	958.014	11.3877	950.287	19.4548	933.326	59.1581	958.014	11.3877	-2.64513	6.6195		958.014	13.7693
17-20	349	848.932	52124.5	0.885092	13.7503	3.17134	1.60812	3.49257	0.160442	1.4631	0.418917	959.233	13.0403	973.376	21.8667	1006.3	64.3091	959.233	13.0403	4.6773	6.22804		959.233	15.1646
17-20	51	393.985	34238.5	0.110285	14.3408	2.61146	1.54336	2.89513	0.160594	1.24983	0.431701	960.076	11.1485	947.847	17.8389	920.468	53.6708	960.076	11.1485	-4.30304	6.20115		960.076	13.5816
17-20	327	564.439	33325.9	0.0853826	13.7842	3.67612	1.60571	3.97218	0.160597	1.5048	0.378834	960.094	13.4231	972.439	24.8555	1001.3	74.6083	960.094	13.4231	4.11539	7.26917		960.094	15.4972
17-20	167	513.91	32699.3	0.100878	13.6929	2.70017	1.61728	2.99956	0.160682	1.30631	0.4355	960.563	11.6578	976.934	18.8206	1014.79	54.6925	960.563	11.6578	5.34338	5.22931		960.563	14.0033
17-20	45	427.053	23736.4	0.0601264	13.8204	2.10317	1.60282	2.60116	0.160729	1.53059	0.588425	960.828	13.6628	971.313	16.2648	995.971	42.706	960.828	13.6628	3.5285	4.35812		960.828	15.7072
17-20	310	429.836	31193.5	0.0759216	13.5753	5.00316	1.6322	5.16174	0.160772	1.26962	0.245968	961.068	11.336	982.708	32.5026	1032.23	101.087	961.068	11.336	6.89403	9.1838		961.068	13.7396
17-20	64	186.176	12627.6	0.546289	13.6884	5.09309	1.61889	5.65624	0.16079	2.46039	0.434988	961.163	21.9699	977.562	35.5061	1015.45	103.206	961.163	21.9699	5.34614	9.86045		961.163	23.2681
17-20	525	994.368	16575	0.0901462	14.1201	3.10182	1.57063	3.42922	0.160916	1.46229	0.426419	961.865	13.0662	958.673	21.2753	952.24	63.4538	961.865	13.0662	-1.01088	6.86943		961.865	15.197
17-20	120	473.543	24973.3	0.262198	14.0249	2.38947	1.58171	2.71431	0.160959	1.28761	0.474377	962.107	11.508	963.044	16.8857	966.091	48.7811	962.107	11.508	0.412458	5.16766		962.107	13.8858
17-20	308	1169.96	32531.1	0.06722	13.9316	2.49813	1.59259	2.84389	0.160987	1.35905	0.477886	962.262	12.1484	967.313	17.7388	979.673	50.8923	962.262	12.1484	1.77727	5.25102		962.262	14.4199
17-20	182	297.231	18149.1	0.240244	13.9942	4.83694	1.58553	5.05865	0.160995	1.48121	0.292807	962.305	13.2409	964.545	31.501	970.562	98.6507	962.305	13.2409	0.850716	10.1697		962.305	15.3486
17-20	37	782.965	41046	0.0875253	13.895	1.67064	1.59696	2.246	0.161006	1.50115	0.668367	962.365	13.4199	969.024	14.0241	985.059	34.0029	962.365	13.4199	2.30377	3.63712		962.365	15.503
17-20	572	592.601	31546.5	0.153981	14.0661	4.02379	1.57838	4.31906	0.161091	1.56953	0.363395	962.838	14.0376	961.73	26.8478	960.105	82.1867	962.838	14.0376	-0.284594	8.70816		962.838	16.0404
17-20	32	588.718	32711.9	0.719752	13.9555	1.88058	1.59228	2.39719	0.161233	1.48659	0.620138	963.624	13.3059	967.19	14.9513	976.209	38.368	963.624	13.3059	1.28912	4.11211		963.624	15.4095
17-20	256	613.192	34017.7	0.0875263	13.8343	2.74291	1.60712	3.02876	0.161321	1.28447	0.424091	964.113	11.5022	972.985	18.9581	993.937	55.7187	964.113	11.5022	3.00059	5.55942		964.113	13.8894
17-20	85	451.828	23679.7	0.153796	13.9224	2.56204	1.59803	2.82239	0.161431	1.18399	0.419498	964.723	10.6086	969.441	17.6278	981.059	52.1829	964.723	10.6086	1.66511	5.34108		964.723	13.164
17-20	303	397.401	28244.5	0.124899	13.5256	4.31676	1.64748	4.54531	0.161683	1.42316	0.313105	966.122	12.7687	988.586	28.7217	1039.65	87.1487	966.122	12.7687	7.0723	7.88589		966.122	14.9595
17-20	306	332.44	20359.1	0.184547	13.656	4.47294	1.63291	4.67603	0.161798	1.36313	0.291515	966.76	12.2377	982.982	29.4486	1020.25	90.6076	966.76	12.2377	5.24306	8.50032		966.76	14.513
17-20	112	527.767	42041.5	0.0943866	13.645	2.9984	1.63458	3.24457	0.161832	1.23968	0.38208	966.951	11.1314	983.624	20.4407	1021.88	60.721	966.951	11.1314	5.37569	5.72719		966.951	13.5972
17-20	287	471.45	24452.6	0.167019	13.6356	3.49529	1.63607	3.71619	0.161869	1.26214	0.339633	967.155	11.3353	984.201	23.4203	1023.28	70.7658	967.155	11.3353	5.48469	6.62949		967.155	13.7649
17-20	578	615.47	53124.7	0.115105	14.0181	4.46696	1.59206	4.62829	0.161933	1.21135	0.261727	967.51	10.8828	967.105	28.8665	967.07	91.1473	967.51	10.8828	-0.0454281	9.49629		967.51	13.3975
17-20	40	259.708	13775.1	0.164315	13.8992	3.69796	1.60577	3.92987	0.161943	1.33	0.338434	967.563	11.9494	972.462	24.591	984.416	75.2681	967.563	11.9494	1.71204	7.61246		967.563	14.2749
17-20	294	424.652	19473.3	0.244686	14.1485	4.67317	1.57793	4.86723	0.161989	1.36065	0.279554	967.821	12.2278	961.555	30.2525	948.164	95.6911	967.821	12.2278	-2.07325	10.3819		967.821	14.5091
17-20	368	852.166	62715.6	0.125024	14.0139	4.11362	1.59626	4.50645	0.162312	1.84015	0.408338	969.612	16.5653	968.75	28.1351	967.677	83.9281	969.612	16.5653	-0.200005	8.8575		969.612	18.3067
17-20	41	550.771	39240	0.116421	14.0053	2.17956	1.59881	2.58784	0.162471	1.39513	0.539112	970.493	12.5698	969.744	16.1658	968.915	44.4788	970.493	12.5698	-0.162893	4.77756		970.493	14.808
17-20	132	479.886	34027	0.0737129	13.9521	3.26447	1.60499	3.51714	0.16248	1.309	0.372176	970.545	11.7943	972.157	22.004	976.681	66.5373	970.545	11.7943	0.628253	6.87665		970.545	14.1581
17-20	264	435.108	23225.9	0.0825371	14.259	3.96582	1.57092	4.21743	0.162529	1.43493	0.340237	970.817	12.9323	958.79	26.1678	932.213	81.3905	970.817	12.9323	-4.1411	9.19767		970.817	15.1171
17-20	348	661.535	29930	0.509075	14.0142	3.01199	1.59935	3.25263	0.162629	1.22782	0.377485	971.372	11.0716	969.956	20.3216	967.645	61.4559	971.372	11.0716	-0.385209	6.47741		971.372	13.5675
17-20	39	254.631	13596.6	0.170153	13.6615	3.59841	1.64073	3.84952	0.162638	1.36759	0.355261	971.418	12.3325	985.992	24.2868	1019.44	72.8673	971.418	12.3325	4.71029	6.91772		971.418	14.6115
17-20	53	873.91	56731.1	0.508402	14.1543	1.55926	1.58515	2.08207	0.162797	1.37976	0.662687	972.3	12.4527	964.394	12.9633	947.287	31.96	972.3	12.4527	-2.64045	3.70405		972.3	14.7163
17-20	13	580.329	49591.9	0.0707344	13.7084	1.77536	1.63906	2.27738	0.16303	1.42637	0.626321	973.594	12.8892	985.35	14.3621	1012.5	35.9865	973.594	12.8892	3.84217	3.64706		973.594	15.0913
17-20	6	322.579	20870.3	0.235221	14.1308	2.84267	1.59021	3.231	0.163045	1.53578	0.475325	973.677	13.879	966.38	20.1419	950.709	58.1316	973.677	13.879	-2.41586	6.43018		973.677	15.9422
17-20	165	541.179	38005.8	0.454675	14.0489	2.69312	1.60062	3.00967	0.163161	1.34359	0.446424	974.322	12.1496	970.45	18.8093	962.603	55.0104	974.322	12.1496	-1.21736	5.92043		974.322	14.4699
17-20	344	556.207	32113.1	0.3188	13.8705	4.4996	1.62123	4.69633	0.163164	1.34504	0.286402	974.337	12.1629	978.469	29.4957	988.637	91.5405	974.337	12.1629	1.44643	9.2079		974.337	14.481
17-20	129	289.033	24472.9	0.327192	14.2541	4.38306	1.57912	4.59274	0.163321	1.37187	0.298705	975.204	12.4158	962.022	28.5544	932.885	89.9454	975.204	12.4158	-4.53646	10.1665		975.204	14.6969
17-20	248	665.502	48110.9	0.105264	14.1717	2.95735	1.58962	3.28346	0.163457	1.42659	0.434477	975.959	12.9202	966.149	20.466	944.768	60.5547	975.959	12.9202	-3.30142	6.76084		975.959	15.1269
17-20	142	350.825	23450.2	0.12868	13.9573	3.24733	1.6143	3.52683	0.163483	1.37602	0.390158	976.104	12.464	975.781	22.1137	975.92	66.1755	976.104	12.464	-0.0188667	6.90132		976.104	14.7411
17-20	118	459.632	29477.4	0.158112	14.0706	2.99766	1.60194	3.22533	0.163548	1.1903	0.369048	976.464	10.7854	970.967	20.1636	959.416	61.2747	976.464	10.7854	-1.77691	6.59665		976.464	13.3583
17-20	70	288.414	16421.8	0.498088	14.1757	2.5717	1.5908	2.9534	0.163624	1.45221	0.491708	976.886	13.1638	966.61	18.4139	944.208	52.6436	976.886	13.1638	-3.46097	5.93448		976.886	15.3383
17-20	527	481.913	36071.4	0.214014	14.0242	4.49181	1.60928	4.66004	0.163756	1.24078	0.266259	977.613	11.255	973.828	29.185	966.204	91.6687	977.613	11.255	-1.18082	9.66996		977.613	13.744
17-20	140	419.919	20341.9	0.087883	14.0688	3.52675	1.60521	3.75418	0.163861	1.28681	0.342768	978.197	11.679	972.242	23.4884	959.68	72.0436	978.197	11.679	-1.92955	7.74807		978.197	14.0946
17-20	55	428.152	20456.7	0.0349852	14.2044	2.79569	1.59123	3.13097	0.164	1.40964	0.450223	978.968	12.8031	966.78	19.5231	940.044	57.3036	978.968	12.8031	-4.14061	6.4927		978.968	15.0392
17-20	163	687.217	38920.7	0.132637	13.9642	2.44021	1.61973	2.8532	0.164114	1.47856	0.518212	979.6	13.4372	977.886	17.9126	974.921	49.7482	979.6	13.4372	-0.4799	5.3093		979.6	15.583
17-20	271	420.46	26068.4	0.378903	14.3362	3.70488	1.5786	3.99188	0.164208	1.48626	0.372321	980.12	13.5138	961.817	24.8151	921.118	76.1276	980.12	13.5138	-6.40548	8.91562		980.12	15.6509
17-20	537	732.178	29048.7	0.385598	14.2757	4.02364	1.58857	4.25342	0.164548	1.3791	0.324234	982.001	12.5617	965.737	26.5057	929.81	82.6104	982.001	12.5617	-5.61305	9.48011		982.001	14.8471
17-20	10	379.304	24998.9	0.231095	13.8186	2.30995	1.64146	2.77927	0.164582	1.54546	0.556067	982.191	14.0795	986.273	17.5371	996.236	46.9026	982.191	14.0795	1.4098	4.852		982.191	16.1477
17-20	104	591.573	38358	0.323117	13.9874	2.28904	1.6225	2.76517	0.164668	1.55128	0.561006	982.667	14.1389	978.96	17.3713	971.522	46.6591	982.667	14.1389	-1.14717	5.07109		982.667	16.201
17-20	176	421.644	22851.1	0.194414	13.9301	2.72606	1.62951	3.10918	0.164703	1.49519	0.480895	982.858	13.6301	981.671	19.5646	979.886	55.5139	982.858	13.6301	-0.303296	5.85029		982.858	15.7613
17-20	61	327.376	17546.4	0.104964	14.0957	4.64101	1.61335	5.04519	0.165007	1.97864	0.392183	984.543	18.0659	975.41	31.6281	955.77	94.9051	984.543	18.0659	-3.0104	10.4018		984.543	19.7138
17-20	181	463.556	32406.4	0.453121	14.0285	4.12916	1.62191	4.39129	0.165093	1.49448	0.340329	985.015	13.6514	978.732	27.5841	965.57	84.2689	985.015	13.6514	-2.0139	9.0147		985.015	15.7878
17-20	206	860.89	54086.1	0.0290805	14.272	4.18954	1.59439	4.6502	0.165107	2.01795	0.433948	985.097	18.4344	968.016	29.0195	930.346	85.9827	985.097	18.4344	-5.88499	9.98449		985.097	20.0521
17-20	15	821.023	34258.6	0.0942168	13.725	1.5082	1.65794	2.03876	0.165108	1.3718	0.672863	985.102	12.5318	992.59	12.9129	1010.04	30.5722	985.102	12.5318	2.46863	3.20225		985.102	14.8342
17-20	273	542.768	24596.1	0.260996	13.7259	3.79961	1.65826	4.0162	0.165151	1.30111	0.323966	985.336	11.8886	992.71	25.4404	1009.9	77.0908	985.336	11.8886	2.43256	7.54026		985.336	14.2979
17-20	324	520.783	47040.5	0.17096	14.2657	4.07451	1.59597	4.30609	0.165198	1.39312	0.323524	985.601	12.7325	968.634	26.8821	931.206	83.6727	985.601	12.7325	-5.8413	9.60806		985.601	15.0055
17-20	172	368.28	27015	0.128239	13.8508	3.70002	1.64402	3.94088	0.165223	1.35661	0.344239	985.738	12.4003	987.258	24.8821	991.523	75.2412	985.738	12.4003	0.583367	7.64714		985.738	14.7263
17-20	122	576.101	27611.5	0.101194	13.9644	3.0117	1.6334	3.26407	0.165501	1.25849	0.385558	987.276	11.5201	983.17	20.5579	974.901	61.38	987.276	11.5201	-1.2694	6.48452		987.276	14.0022
17-20	158	259.383	19119.4	0.326372	13.8674	3.63912	1.64501	3.9093	0.16552	1.42808	0.365305	987.378	13.0738	987.636	24.6883	989.076	74.0208	987.378	13.0738	0.171643	7.58702		987.378	15.3021
17-20	28	363.735	23854.4	0.241054	14.1865	3.01582	1.60819	3.54599	0.165539	1.86517	0.525994	987.487	17.077	973.405	22.2015	942.653	61.8139	987.487	17.077	-4.75612	7.10418		987.487	18.8251
17-20	557	705.323	49558.4	0.0898172	13.4509	3.15311	1.69682	3.48833	0.165606	1.49208	0.427735	987.856	13.6658	1007.33	22.2868	1050.85	63.5865	987.856	13.6658	5.99425	5.83503		987.856	15.8109
17-20	17	429.698	27449.2	0.113083	13.8291	1.96582	1.65144	2.39528	0.165708	1.36854	0.571349	988.422	12.5409	990.101	15.1487	994.706	39.9475	988.422	12.5409	0.631775	4.18506		988.422	14.8552
17-20	343	1391.75	130290	0.261247	13.914	2.37045	1.64176	2.90488	0.165748	1.67907	0.578016	988.642	15.3897	986.387	18.331	982.28	48.2736	988.642	15.3897	-0.64769	5.18847		988.642	17.3198
17-20	299	347.471	29456.6	0.23501	14.1853	4.42418	1.61125	4.60213	0.16584	1.26736	0.275386	989.149	11.6217	974.595	28.8358	942.823	90.6659	989.149	11.6217	-4.91353	10.164		989.149	14.0936
17-20	100	394.384	27095.7	0.113778	14.2808	2.51093	1.60084	2.85089	0.165878	1.35012	0.473577	989.358	12.383	970.539	17.8179	929.083	51.5549	989.358	12.383	-6.48768	6.05746		989.358	14.7264
17-20	311	428.748	34909.1	0.0539302	13.2803	5.08832	1.72488	5.26751	0.16621	1.3622	0.258605	991.194	12.5153	1017.85	33.86	1076.52	102.202	991.194	12.5153	7.92605	8.81821		991.194	14.8448
17-20	544	488.543	24669.2	0.0764274	14.213	3.78823	1.61319	4.09704	0.166364	1.56046	0.380876	992.044	14.3482	975.347	25.6825	938.802	77.677	992.044	14.3482	-5.67135	8.87588		992.044	16.4173
17-20	260	457.364	36464	0.0480641	13.8824	3.49235	1.65286	4.0331	0.166491	2.01726	0.500176	992.747	18.5605	990.648	25.516	986.882	71.0716	992.747	18.5605	-0.59427	7.48457		992.747	20.1902
17-20	130	588.24	35332.7	0.0737455	13.7045	2.35552	1.67538	2.67242	0.166596	1.26229	0.47234	993.328	11.6204	999.231	16.9931	1013.07	47.743	993.328	11.6204	1.94884	4.76109		993.328	14.1102
17-20	89	382.134	21969.1	0.121986	14.1342	2.83991	1.62524	3.19304	0.166677	1.45958	0.457114	993.777	13.4422	980.018	20.0723	950.189	58.0794	993.777	13.4422	-4.5873	6.54747		993.777	15.6414
17-20	56	391.386	35141.4	0.293048	13.759	2.45109	1.66969	2.99692	0.166691	1.72444	0.575404	993.853	15.8826	997.069	19.0324	1005.01	49.7407	993.853	15.8826	1.1105	5.14311		993.853	17.775
17-20	101	415.939	22723	0.552757	13.9293	2.43059	1.64942	2.98534	0.166705	1.73335	0.580621	993.93	15.9659	989.329	18.872	980.004	49.5125	993.93	15.9659	-1.42102	5.37682		993.93	17.8493
17-20	539	700.264	30490.5	0.0399846	13.4319	3.32384	1.71234	3.92679	0.166883	2.09088	0.532464	994.916	19.2767	1013.16	25.173	1053.71	66.9589	994.916	19.2767	5.57939	6.27276		994.916	20.8536
17-20	54	436.738	24859.4	0.127614	14.0626	2.47319	1.6375	2.79556	0.167083	1.30326	0.466191	996.022	12.0277	984.749	17.6238	960.615	50.5229	996.022	12.0277	-3.6859	5.59519		996.022	14.4575
17-20	314	524.648	45163.8	0.145909	13.9838	3.05598	1.64786	3.30823	0.167198	1.26703	0.382993	996.656	11.7002	988.731	20.9058	972.049	62.2924	996.656	11.7002	-2.53145	6.67992		996.656	14.1898
17-20	187	446.521	16644.4	0.102819	13.6612	3.74608	1.68972	4.02815	0.167491	1.48084	0.367623	998.272	13.6951	1004.66	25.6961	1019.48	75.859	998.272	13.6951	2.0801	7.40898		998.272	15.8754
17-20	128	1296.7	54642.4	0.0291234	13.9382	1.53099	1.6586	2.01728	0.16774	1.31358	0.651166	999.645	12.1637	992.841	12.7788	978.706	31.1927	999.645	12.1637	-2.13941	3.4845		999.645	14.5854
17-20	532	611.564	24582.2	0.1286	14.0121	2.96634	1.65196	3.37936	0.167954	1.61892	0.47906	1000.83	15.0075	990.302	21.3753	967.96	60.5402	1000.83	15.0075	-3.39582	6.65007		1000.83	17.0253
17-20	24	366.926	24818.4	0.136316	14.1145	2.75142	1.63998	3.39862	0.167954	1.99507	0.587023	1000.83	18.4944	985.706	21.4381	953.05	56.3231	1000.83	18.4944	-5.01348	6.50238		1000.83	20.1538
17-20	459	1237.97	68490	0.0557748	13.7609	4.24988	1.68339	4.51016	0.168082	1.51	0.3348	1001.53	14.0069	1002.27	28.7311	1004.73	86.2543	1001.53	14.0069	0.318567	8.67026		1001.53	16.1564
17-20	27	493.034	45526.2	0.0700104	14.0125	2.01986	1.65495	2.72767	0.168262	1.83312	0.672047	1002.53	17.0198	991.445	17.2647	967.885	41.257	1002.53	17.0198	-3.57933	4.75246		1002.53	18.8215
17-20	300	561.062	49703	0.146427	13.4739	2.91334	1.7237	3.33015	0.168516	1.61318	0.484417	1003.93	14.9971	1017.4	21.3999	1047.41	58.7816	1003.93	14.9971	4.1512	5.56642		1003.93	17.0272
17-20	484	1100	59898.1	0.0599531	13.5896	4.20911	1.70931	4.42597	0.168546	1.36844	0.309184	1004.09	12.7238	1012.03	28.355	1030.1	85.1378	1004.09	12.7238	2.52492	8.15045		1004.09	15.0719
17-20	548	968.435	43970.5	0.034692	13.5793	2.47115	1.71812	2.76192	0.169284	1.23354	0.446623	1008.17	11.5124	1015.32	17.7271	1031.64	49.9836	1008.17	11.5124	2.27553	4.86453		1008.17	14.0853
17-20	138	405.69	23612.2	0.113832	13.3547	3.38231	1.74947	3.62309	0.169524	1.29876	0.358466	1009.49	12.1358	1026.97	23.4092	1065.3	68.0336	1009.49	12.1358	5.23898	6.15806		1009.49	14.603
17-20	113	339.295	25186.8	0.160342	13.3254	3.67301	1.75563	3.83982	0.169747	1.11948	0.291546	1010.72	10.4724	1029.24	24.8413	1069.71	73.8491	1010.72	10.4724	5.51507	6.59596		1010.72	13.2632
17-20	25	282.032	13348.7	0.159826	14.139	4.52926	1.65534	4.94658	0.169822	1.98858	0.402012	1011.13	18.6096	991.596	31.3138	949.525	92.7156	1011.13	18.6096	-6.4879	10.581		1011.13	20.2897
17-20	599	326.684	24822.1	0.333288	14.2583	4.52127	1.6423	4.83648	0.169906	1.71747	0.355107	1011.59	16.0792	986.596	30.5255	932.312	92.7625	1011.59	16.0792	-8.50356	10.9327		1011.59	18.0095
17-20	35	350.713	24584.2	0.739555	14.0146	2.82805	1.67256	3.25845	0.170078	1.61853	0.496718	1012.54	15.166	998.159	20.7066	967.603	57.7285	1012.54	15.166	-4.64444	6.43697		1012.54	17.2059
17-20	78	449.802	24871.9	0.563445	13.7242	2.70051	1.70844	3.05905	0.170127	1.43702	0.46976	1012.81	13.4685	1011.7	19.5934	1010.16	54.7217	1012.81	13.4685	-0.262489	5.59262		1012.81	15.737
17-20	591	469.213	25714.5	0.087064	14.3468	3.86941	1.63998	4.12032	0.170719	1.41586	0.343628	1016.07	13.3096	985.706	25.991	919.609	79.5677	1016.07	13.3096	-10.4894	9.66886		1016.07	15.6145
17-20	74	366.107	24506.4	0.127407	13.9118	2.56407	1.69233	2.97741	0.170826	1.51344	0.508308	1016.66	14.2346	1005.64	19.0037	982.611	52.2138	1016.66	14.2346	-3.46546	5.68558		1016.66	16.4094
17-20	157	382.337	24462.3	0.193564	13.3108	2.96938	1.76898	3.36064	0.170849	1.57374	0.468287	1016.79	14.8035	1034.14	21.8007	1071.92	59.6935	1016.79	14.8035	5.14308	5.45998		1016.79	16.9038
17-20	258	974.429	69979.6	0.0285515	13.9741	1.8872	1.6877	2.33059	0.171122	1.36751	0.586768	1018.29	12.8811	1003.89	14.8599	973.502	38.4974	1018.29	12.8811	-4.60059	4.34293		1018.29	15.261
17-20	563	456.373	24399.6	0.115545	13.3654	3.77021	1.76773	4.00825	0.17143	1.36074	0.339484	1019.98	12.837	1033.69	25.9957	1063.69	75.8767	1019.98	12.837	4.109	6.94588		1019.98	15.2307
17-20	88	764.607	51291.6	0.0722779	13.8902	1.96841	1.70128	2.39895	0.171463	1.37124	0.571602	1020.17	12.9383	1009.01	15.3414	985.752	40.0239	1020.17	12.9383	-3.49156	4.40223		1020.17	15.3166
17-20	175	603.679	38721.9	0.0521466	14.0236	2.59269	1.68717	3.00781	0.171674	1.52475	0.506931	1021.33	14.4018	1003.7	19.176	966.29	52.9439	1021.33	14.4018	-5.69607	5.97989		1021.33	16.5712
17-20	7	285.839	19066.7	0.43114	13.5312	2.84354	1.75206	3.17574	0.172017	1.41408	0.445275	1023.22	13.3792	1027.92	20.5296	1038.82	57.4512	1023.22	13.3792	1.50155	5.59759		1023.22	15.7014
17-20	34	310.616	15712.2	0.150089	13.7007	2.99715	1.73249	3.37198	0.172227	1.54511	0.45822	1024.37	14.6342	1020.68	21.7092	1013.62	60.7039	1024.37	14.6342	-1.06046	6.22213		1024.37	16.7839
[truncated: 3,651 more rows]

## Sheet: S4b Reference materials
Supplemental File S4b. Table of U-Pb isotopic data from the Arizona LaserChron Center - Reference Materials
								Isotope Ratios					Apparent Ages (Ma)
																			Cut-off =	122				"Best Age"	± 2σ
Number	Sample	Analysis	U	206Pb	Th/U	206Pb*	± 2σ	207Pb*	± 2σ	206Pb*	± 2σ	error	206Pb*	± 2σ	207Pb*	± 2σ	206Pb*	± 2σ	"Best Age"	± 2σ	disc.	± 2σ		(Ma)	(Ma)
			(ppm)	204Pb		207Pb*	(%)	235U*	(%)	238U	(%)	corr.	238U*	(Ma)	235U	(Ma)	207Pb*	(Ma)	(Ma)	(Ma)	%	disc.		with systematic uncertainty
1	17-02	R33	102.229	7000.97	0.365927	14.6083	19.5811	0.6231	19.7209	0.066046	2.3446	0.118889	412.29	9.36391	491.789	76.909	882.351	405.833	412.29	9.36391	53.2737	21.5177		412.29	9.76697
1	17-02	R33	294.367	14066	0.707831	18.1984	4.67805	0.510735	4.94481	0.06744	1.60218	0.324013	420.714	6.52535	418.943	16.9745	410.16	104.686	420.714	6.52535	-2.57312	26.2281		420.714	7.11994
1	17-02	R33	402.169	24389.7	0.448003	18.3865	5.11137	0.505164	5.26095	0.0673938	1.2456	0.236763	420.435	5.06982	415.192	17.9289	387.113	114.802	420.435	5.06982	-8.60787	32.2352		420.435	5.81648
1	17-02	R33	216.228	15836.4	0.838943	17.4691	6.67608	0.522959	6.83376	0.0662866	1.45954	0.213577	413.744	5.84905	427.126	23.8281	500.968	147.048	413.744	5.84905	17.411	24.2702		413.744	6.48678
1	17-02	R33	917.99	46210.4	0.842956	18.0747	2.53918	0.504417	2.92649	0.0661527	1.45494	0.497164	412.935	5.81959	414.688	9.96325	425.401	56.6861	412.935	5.81959	2.93042	13.007		412.935	6.45796
1	17-02	R33	150.555	9932.96	0.437235	16.6244	11.1965	0.537965	11.4675	0.0648915	2.47848	0.21613	405.305	9.73611	437.082	40.7348	609.046	242.22	405.305	9.73611	33.4525	26.5145		405.305	10.1109
1	17-02	R33	271.511	13803.2	0.494926	18.1738	6.00611	0.505391	6.15785	0.066644	1.35859	0.220627	415.905	5.47202	415.345	20.9919	413.186	134.273	415.905	5.47202	-0.657997	32.7375		415.905	6.156
1	17-02	R33	395.352	30577.1	0.616954	17.6884	5.22209	0.520475	5.45825	0.0668	1.58817	0.290967	416.848	6.41075	425.469	18.9721	473.419	115.583	416.848	6.41075	11.9495	21.5397		416.848	7.00493
1	17-02	R33	142.032	11987.7	0.752831	15.5343	6.86501	0.58499	7.12419	0.0659369	1.90411	0.267274	411.63	7.59288	467.663	26.7	753.907	144.951	411.63	7.59288	45.4004	10.5459		411.63	8.08709
1	17-02	R33	134.274	11456.6	0.384919	16.0985	9.52878	0.574885	9.67969	0.0671514	1.70257	0.175891	418.971	6.90642	461.169	35.8813	678.133	203.721	418.971	6.90642	38.217	18.5885		418.971	7.46579
1	17-02	R33	355.242	21942.4	0.998423	18.4759	4.09403	0.502537	4.42603	0.0673693	1.68185	0.379992	420.287	6.84312	413.418	15.0312	376.21	92.1223	420.287	6.84312	-11.7162	27.4163		420.287	7.41069
1	17-02	R33	165.289	7445.93	0.655545	18.0729	6.35043	0.50905	6.60832	0.0667539	1.82811	0.276638	416.569	7.37452	417.81	22.6358	425.62	141.697	416.569	7.37452	2.12647	32.6299		416.569	7.89439
1	17-02	R33	720.629	51625.5	0.694777	18.4092	2.54214	0.504086	2.80035	0.067333	1.1745	0.419413	420.068	4.7764	414.465	9.52966	384.343	57.0903	420.068	4.7764	-9.29519	16.2822		420.068	5.56169
1	17-02	R33	270.947	14248.1	0.788776	17.2083	4.82599	0.538871	5.00967	0.0672837	1.34412	0.268305	419.77	5.46243	437.68	17.8128	533.977	105.674	419.77	5.46243	21.388	15.5909		419.77	6.1592
1	17-02	R33	173.571	23314.6	0.745312	17.6891	6.93011	0.52319	7.13093	0.0671512	1.68037	0.235645	418.97	6.81634	427.28	24.8716	473.321	153.361	418.97	6.81634	11.483	28.7166		418.97	7.38268
1	17-02	R33	209.7	11198.3	0.797263	16.9935	7.94838	0.546892	8.10301	0.0674328	1.57544	0.194427	420.67	6.4158	442.958	29.0902	561.409	173.259	420.67	6.4158	25.0689	23.153		420.67	7.01972
1	17-02	R33	445.48	24541.2	0.704915	17.9715	2.99806	0.515462	3.38742	0.0672155	1.57678	0.46548	419.358	6.40186	422.116	11.6992	438.156	66.7622	419.358	6.40186	4.29022	14.6564		419.358	7.00349
1	17-02	R33	198.887	10304.4	0.653063	17.6611	7.60788	0.523498	7.93983	0.0670844	2.27181	0.286129	418.566	9.20691	427.485	27.7039	476.807	168.257	418.566	9.20691	12.2148	31.038		418.566	9.62898
1	17-02	R33	247.057	18989.7	0.769037	17.7661	6.32409	0.519137	6.50663	0.0669211	1.53041	0.235208	417.58	6.18811	424.575	22.5782	463.721	140.21	417.58	6.18811	9.95012	27.26		417.58	6.80409
1	17-02	R33	212.525	13222.1	0.599075	17.2336	7.02808	0.531516	7.22595	0.0664628	1.67943	0.232417	414.81	6.74704	432.815	25.4649	530.778	153.966	414.81	6.74704	21.8486	22.7054		414.81	7.30827
1	17-02	R33	477.085	17526.1	0.668466	18.3926	4.33539	0.485897	4.59803	0.0648449	1.53175	0.333133	405.023	6.01307	402.111	15.2674	386.371	97.3827	405.023	6.01307	-4.82738	26.4669		405.023	6.61073
1	17-02	R33	181.452	10477.3	0.616765	17.3643	9.01535	0.516023	9.16623	0.0650153	1.6563	0.180695	406.054	6.51802	422.492	31.6825	514.175	198.136	406.054	6.51802	21.028	30.458		406.054	7.07507
2	17-14	R33	450.218	4809.52	0.821266	17.8634	6.17588	0.520417	6.50346	0.0674534	2.038	0.313371	420.795	8.30188	425.43	22.6038	451.563	137.169	420.795	8.30188	6.81368	28.3663		420.795	8.90459
2	17-14	R33	124.629	1528.27	0.527968	15.1395	23.6334	0.588958	23.9882	0.0646968	4.11044	0.171352	404.126	16.1014	470.202	90.3413	808.018	496.16	404.126	16.1014	49.9855	30.7757		404.126	16.3787
2	17-14	R33	94.4576	983.825	0.566071	14.6265	22.6708	0.615345	22.8839	0.0653052	3.11596	0.136164	407.809	12.3136	486.925	88.5703	879.746	470.449	407.809	12.3136	53.6447	24.8282		407.809	12.6953
2	17-14	R33	388.608	3994.39	0.784564	17.7859	8.46113	0.52447	8.60147	0.0676838	1.54745	0.179905	422.186	6.32378	428.133	30.0494	461.214	187.685	422.186	6.32378	8.46189	37.2755		422.186	7.10505
3	17-16	R33	555.312	3220.31	0.599063	16.9651	13.8891	0.543597	14.0229	0.0669145	1.93295	0.137842	417.54	7.81501	440.793	50.1533	565.031	302.813	417.54	7.81501	26.1033	39.627		417.54	8.83549
3	17-16	R33	3217.02	16471	1.03457	17.5735	3.61686	0.523424	4.16977	0.0667422	2.07492	0.49761	416.499	8.36875	427.436	14.5473	487.783	79.8617	416.499	8.36875	14.6139	14.0846		416.499	9.32343
3	17-16	R33	307.693	1751.62	0.626359	16.554	14.8297	0.553879	14.9564	0.066528	1.94228	0.129863	415.204	7.81021	447.535	54.1449	618.218	320.5	415.204	7.81021	32.8385	34.8411		415.204	8.82082
3	17-16	R33	965.361	4609.13	0.605349	18.2141	6.25602	0.50621	6.51894	0.0668999	1.83271	0.281137	417.452	7.40824	415.898	22.2469	408.238	140.001	417.452	7.40824	-2.25697	35.115		417.452	8.47815
3	17-16	R33	425.216	2163.75	0.521906	16.3499	16.0137	0.561561	16.1074	0.0666192	1.7352	0.107727	415.755	6.98646	452.542	58.8322	644.977	344.662	415.755	6.98646	35.5396	34.4634		415.755	8.10465
3	17-16	R33	199.38	974.083	0.540124	15.4315	19.755	0.58821	19.9691	0.0658609	2.91657	0.146054	411.171	11.6176	469.724	75.1296	767.914	416.998	411.171	11.6176	46.4561	29.1151		411.171	12.2995
3	17-16	R33	3029.29	17412.4	1.01469	17.9429	2.70926	0.510766	3.23127	0.066497	1.76096	0.544975	415.017	7.078	418.964	11.0926	441.701	60.2846	415.017	7.078	6.04121	12.9235		415.017	8.17999
3	17-16	R33	401.256	2751.23	0.588454	16.2678	15.3477	0.56831	15.5777	0.0670816	2.66688	0.171199	418.549	10.8076	456.921	57.3326	655.775	329.671	418.549	10.8076	36.1749	32.1285		418.549	11.5647
3	17-16	R33	1084.63	7106.1	0.847956	17.6512	4.33952	0.517831	4.60549	0.0663209	1.54242	0.33491	413.952	6.1842	423.701	15.9543	478.043	95.9747	413.952	6.1842	13.407	17.433		413.952	7.41595
3	17-16	R33	1268.73	8426.56	0.882346	18.0319	4.73135	0.505749	4.94113	0.0661703	1.42445	0.288285	413.042	5.69906	415.587	16.8519	430.689	105.501	413.042	5.69906	4.09745	23.5294		413.042	7.0121
3	17-16	R33	202.768	1370.12	0.556702	14.4197	24.8741	0.631106	25.021	0.0660305	2.7074	0.108205	412.197	10.8105	496.784	98.377	909.143	514.185	412.197	10.8105	54.661	25.67		412.197	11.5458
3	17-16	R33	355.038	2394.17	0.662667	16.5348	10.6479	0.553206	10.8366	0.0663702	2.01342	0.185797	414.25	8.07824	447.094	39.1955	620.718	229.885	414.25	8.07824	33.2627	24.7506		414.25	9.05437
3	17-16	R33	790.987	11961.9	0.674831	17.4063	5.61761	0.525427	5.84165	0.0663601	1.6023	0.274289	414.189	6.42785	428.77	20.4316	508.867	123.565	414.189	6.42785	18.6056	19.8048		414.189	7.62118
3	17-16	R33	1314.05	26573.2	0.929112	17.8448	3.29931	0.510854	3.6097	0.0661449	1.4644	0.405686	412.888	5.85679	419.023	12.3931	453.924	73.2545	412.888	5.85679	9.04019	14.7357		412.888	7.13983
3	17-16	R33	877.775	13635.6	0.842397	18.06	4.97233	0.50668	5.21679	0.0663956	1.57822	0.302528	414.404	6.33443	416.214	17.8138	427.212	110.94	414.404	6.33443	2.99807	25.2334		414.404	7.54382
3	17-16	R33	942.832	19643.5	0.590598	18.0452	4.80635	0.509538	4.96134	0.0667153	1.23041	0.248	416.336	4.96073	418.139	17.0048	429.044	107.202	416.336	4.96073	2.96198	24.2738		416.336	6.44753
3	17-16	R33	874.878	16337.3	0.72283	17.6278	3.97094	0.518942	4.28627	0.0663752	1.61361	0.37646	414.28	6.47459	424.444	14.8695	480.972	87.738	414.28	6.47459	13.8661	15.7699		414.28	7.66104
3	17-16	R33	2883.83	39673.7	1.27067	18.0438	2.00648	0.500295	2.54057	0.0655003	1.55837	0.613394	408.989	6.17559	411.902	8.60227	429.208	44.7296	408.989	6.17559	4.71068	10.0342		408.989	7.38258
3	17-16	R33	575.02	9452.42	0.642643	16.8885	7.8068	0.542864	7.95306	0.0665225	1.51819	0.190895	415.171	6.10442	440.311	28.4155	574.921	169.82	415.171	6.10442	27.7864	21.3568		415.171	7.35619
3	17-16	R33	1846.25	28942.9	0.915691	18.2122	3.22932	0.505033	3.54753	0.0667375	1.4685	0.413949	416.47	5.92248	415.104	12.0875	408.467	72.2534	416.47	5.92248	-1.95915	18.0937		416.47	7.21328
3	17-16	R33	1734.46	40630.5	0.96751	17.7232	3.03968	0.522778	3.43617	0.0672274	1.60238	0.466328	419.43	6.5069	427.005	11.9782	469.055	67.3164	419.43	6.5069	10.5799	12.9079		419.43	7.71474
3	17-16	R33	348.056	6752.13	0.290138	14.4165	10.8725	0.636811	11.0505	0.0666127	1.97573	0.17879	415.716	7.95418	500.33	43.6608	909.599	224.056	415.716	7.95418	54.2968	11.2917		415.716	8.95053
3	17-16	R33	366.935	5849.29	0.484113	16.0183	7.69376	0.558849	7.98401	0.0649527	2.13319	0.267183	405.675	8.38717	450.777	29.0651	688.816	164.194	405.675	8.38717	41.1054	14.0915		405.675	9.29463
3	17-16	R33	2662.6	40915.8	0.995399	17.9191	4.38378	0.503011	7.4971	0.0654005	6.08186	0.811228	408.385	24.0671	413.739	25.4778	444.656	97.4705	408.385	24.0671	8.1569	20.8473		408.385	24.3589
4	17-18	R33	836.41	34987.8	0.723072	18.1427	2.72541	0.507542	3.09405	0.0668131	1.46467	0.473383	416.927	5.91331	416.795	10.577	417.018	60.8869	416.927	5.91331	0.0218675	14.6661		416.927	7.49744
4	17-18	R33	456.165	27734.3	0.627473	18.3099	4.72649	0.499183	4.99836	0.0663185	1.626	0.325308	413.937	6.51909	411.149	16.8994	396.48	105.978	413.937	6.51909	-4.40319	27.9551		413.937	7.96461
4	17-18	R33	147.891	5758.12	0.728331	15.1459	17.1281	0.619132	17.354	0.0680403	2.7913	0.160844	424.338	11.4631	489.303	67.4048	807.131	359.069	424.338	11.4631	47.4263	23.4316		424.338	12.3757
4	17-18	R33	410.505	21990.9	0.656647	18.6946	4.05817	0.499607	4.3071	0.0677692	1.44303	0.335035	422.702	5.90403	411.436	14.5705	349.704	91.7461	422.702	5.90403	-20.8742	31.7567		422.702	7.52836
4	17-18	R33	341.612	14567.7	0.767992	17.8359	7.06743	0.525271	7.16868	0.0679777	1.20057	0.167475	423.96	4.92619	428.667	25.0685	455.031	156.894	423.96	4.92619	6.82829	32.1437		423.96	6.79924
4	17-18	R33	152.27	7999.09	0.616789	17.2038	9.45558	0.532841	9.63123	0.0665133	1.83105	0.190116	415.115	7.3614	433.693	33.9979	534.563	207.142	415.115	7.3614	22.345	30.1226		415.115	8.67293
4	17-18	R33	882.572	32440.8	0.642014	18.1476	3.28957	0.500511	3.6386	0.0659055	1.55504	0.427373	411.441	6.19816	412.048	12.3238	416.407	73.4998	411.441	6.19816	1.19265	17.5038		411.441	7.68874
4	17-18	R33	116.311	3915.32	0.602045	15.9665	16.4742	0.573012	16.5884	0.0663837	1.94289	0.117123	414.332	7.79677	459.961	61.376	695.714	351.623	414.332	7.79677	40.4451	30.1207		414.332	9.04039
4	17-18	R33	137.32	6734.66	0.683062	16.069	10.4383	0.575122	10.6376	0.0670557	2.04991	0.192703	418.392	8.30425	461.322	39.4435	682.064	223.039	418.392	8.30425	38.6579	20.0961		418.392	9.50171
4	17-18	R33	681.965	29490.6	0.688872	18.5656	3.05089	0.492616	3.35729	0.0663597	1.40124	0.417372	414.186	5.62123	406.692	11.2508	365.313	68.7366	414.186	5.62123	-13.3786	21.3885		414.186	7.2511
4	17-18	R33	298.563	12326.7	0.802199	18.7639	6.26393	0.489564	6.42347	0.0666531	1.42272	0.221488	415.96	5.73106	404.613	21.4371	341.329	141.841	415.96	5.73106	-21.8648	50.6692		415.96	7.34831
4	17-18	R33	162.67	5969.61	0.758429	16.5244	9.53131	0.561387	9.78917	0.0673095	2.23203	0.22801	419.926	9.07411	452.429	35.7415	622.07	205.706	419.926	9.07411	32.4954	22.37		419.926	10.1874
4	17-18	R33	375.257	13288.2	0.904127	17.3505	5.8665	0.532765	6.02109	0.0670712	1.35561	0.225144	418.486	5.49282	433.643	21.2511	515.899	128.867	418.486	5.49282	18.8822	20.2905		418.486	7.18177
4	17-18	R33	133.833	6151.07	0.596119	15.3646	8.86192	0.5902	9.02258	0.0657975	1.6951	0.187873	410.787	6.74603	470.995	34.0055	777.049	186.452	410.787	6.74603	47.135	12.7145		410.787	8.13214
4	17-18	R33	238.769	10398.8	0.629788	19.1226	5.82557	0.489454	6.11101	0.067912	1.84585	0.302053	423.564	7.56701	404.538	20.3912	298.272	132.926	423.564	7.56701	-42.0056	63.3359		423.564	8.89504
4	17-18	R33	146.261	7005.02	0.683564	16.1249	10.7364	0.566557	10.9281	0.066287	2.0382	0.186509	413.747	8.16806	455.786	40.1357	674.636	229.699	413.747	8.16806	38.671	20.9162		413.747	9.35875
4	17-18	R33	455.569	19653.7	0.427982	17.7924	4.73074	0.516056	5.00459	0.0666224	1.63279	0.326258	415.774	6.57442	422.513	17.2978	460.4	104.924	415.774	6.57442	9.69289	20.6303		415.774	8.02114
4	17-18	R33	898.515	38492.1	0.714439	18.4138	3.19154	0.492548	3.52633	0.0658082	1.49971	0.425288	410.852	5.96932	406.645	11.8162	383.783	71.7166	410.852	5.96932	-7.05311	20.0651		410.852	7.50199
4	17-18	R33	381.381	13770.4	0.881111	17.613	4.95213	0.520831	5.15636	0.0665608	1.43684	0.278655	415.402	5.78044	425.706	17.9308	482.871	109.408	415.402	5.78044	13.9724	19.5287		415.402	7.3831
4	17-18	R33	198.037	5975.05	0.783301	15.1998	8.61791	0.600581	8.85277	0.0662365	2.02563	0.228813	413.442	8.11189	477.603	33.7321	799.691	180.67	413.442	8.11189	48.2998	11.7243		413.442	9.30826
4	17-18	R33	1618.08	47566.3	0.596502	17.7345	1.99281	0.52131	2.38081	0.0670814	1.30268	0.547158	418.548	5.27911	426.026	8.28392	467.656	44.129	418.548	5.27911	10.5008	8.52045		418.548	7.02039
4	17-18	R33	115.357	4190.16	0.621289	14.693	16.0705	0.630468	16.1619	0.0672141	1.71617	0.106186	419.349	6.96766	496.387	63.4768	870.394	333.449	419.349	6.96766	51.8207	18.4749		419.349	8.36704
4	17-18	R33	134.436	4010.66	0.392585	17.5549	15.8983	0.512291	15.9774	0.0652533	1.58752	0.0993608	407.495	6.26885	419.989	54.9695	490.157	351.202	407.495	6.26885	16.8645	59.581		407.495	7.72094
4	17-18	R33	729.439	28808.6	0.633469	18.3763	2.9711	0.500787	3.22563	0.0667725	1.2559	0.38935	416.682	5.06757	412.235	10.9291	388.368	66.682	416.682	5.06757	-7.29038	18.4677		416.682	6.84952
5	17-20	R33	390.051	7984.78	1.29438	18.5104	6.17207	0.510649	6.30959	0.0685845	1.31018	0.207648	427.622	5.42082	418.886	21.6574	372.016	138.98	427.622	5.42082	-14.9472	42.9674		427.622	6.50934
5	17-20	R33	72.4663	2018.11	0.322033	14.1186	23.1808	0.63996	23.4058	0.0655588	3.23723	0.138309	409.343	12.8394	502.281	92.8057	952.463	475.756	409.343	12.8394	57.0227	21.5095		409.343	13.2838
5	17-20	R33	305.534	10152.3	0.807852	17.6873	9.70153	0.519415	9.81378	0.0666597	1.48001	0.15081	416	5.96241	424.761	34.0679	473.535	214.76	416	5.96241	12.1502	39.8619		416	6.91747
5	17-20	R33	128.546	2253.67	0.54545	14.6204	15.9146	0.621164	16.0956	0.0658953	2.40716	0.149554	411.378	9.59319	490.577	62.6404	880.603	329.75	411.378	9.59319	53.2845	17.527		411.378	10.1957
5	17-20	R33	209.553	5755.27	0.752544	16.6398	11.4896	0.567486	11.6307	0.0685157	1.80609	0.155286	427.207	7.46565	456.387	42.7614	607.049	248.651	427.207	7.46565	29.6256	28.852		427.207	8.28566
5	17-20	R33	319.732	4337.75	0.635534	18.2929	14.4033	0.516036	14.6909	0.0684935	2.89259	0.196897	427.073	11.9532	422.5	50.7853	398.571	323.137	427.073	11.9532	-7.15116	86.9235		427.073	12.4729
5	17-20	R33	194.963	4825.35	0.664651	15.7219	17.3597	0.580641	17.4731	0.0662368	1.9874	0.113741	413.444	7.95885	464.873	65.1962	728.563	368.632	413.444	7.95885	43.2522	28.7335		413.444	8.68605
5	17-20	R33	576.27	11757.8	0.676098	17.1737	6.18686	0.533422	6.35244	0.0664694	1.44095	0.226834	414.85	5.7895	434.078	22.4387	538.365	135.357	414.85	5.7895	22.9426	19.4038		414.85	6.76436
5	17-20	R33	221.042	5119.44	0.684019	10.6948	29.613	0.855109	29.659	0.066356	1.65129	0.0556761	414.165	6.62401	627.45	139.032	1498.09	563.108	414.165	6.62401	72.3539	10.4011		414.165	7.48729
5	17-20	R33	638.918	24995.7	0.701285	15.2415	11.1616	0.604936	11.2831	0.0668998	1.65161	0.146379	417.451	6.67618	480.361	43.1893	793.948	234.263	417.451	6.67618	47.4208	15.5368		417.451	7.5459
5	17-20	R33	584.789	12345.2	0.690433	16.1113	12.0469	0.564574	12.1248	0.0659993	1.37144	0.113111	412.007	5.47366	454.5	44.4321	676.477	257.746	412.007	5.47366	39.0952	23.2196		412.007	6.48402
5	17-20	R33	432.358	13505.2	0.674305	16.5168	10.5991	0.548731	10.72	0.0657618	1.60542	0.14976	410.571	6.38587	444.165	38.5708	623.065	228.706	410.571	6.38587	34.1047	24.2096		410.571	7.26375
5	17-20	R33	461.185	10507	0.681658	18.4059	7.35919	0.49382	7.49623	0.0659499	1.42682	0.190338	411.709	5.69068	407.51	25.1632	384.744	165.338	411.709	5.69068	-7.00846	46.0089		411.709	6.66669
5	17-20	R33	225.205	4135.46	0.706037	14.0142	15.9799	0.660764	16.0827	0.0671898	1.81589	0.112909	419.203	7.37001	515.081	64.9944	967.64	326.63	419.203	7.37001	56.6778	14.6434		419.203	8.17126
5	17-20	R33	173.225	5677.77	0.562223	12.8223	30.3426	0.711837	30.3754	0.0662271	1.41108	0.0464547	413.385	5.65009	545.836	128.424	1146.59	606.225	413.385	5.65009	63.9467	19.0685		413.385	6.63932
5	17-20	R33	219.062	4853.24	0.643216	12.6303	19.8528	0.714176	19.9412	0.0654497	1.87623	0.0940882	408.683	7.42984	547.223	84.4076	1176.52	393.611	408.683	7.42984	65.2634	11.6384		408.683	8.18855
5	17-20	R33	260.34	5718.59	0.799474	7.78602	44.3232	1.16679	44.3857	0.0659169	2.35428	0.0530414	411.509	9.38531	785.142	243.853	2076.65	790.897	411.509	9.38531	80.184	7.56051		411.509	10.0012
5	17-20	R33	222.594	5372.14	0.688779	7.31308	56.1661	1.22874	56.2209	0.0651999	2.48033	0.0441175	407.172	9.78685	813.764	317.279	2186.32	998.537	407.172	9.78685	81.3764	8.51754		407.172	10.3663
5	17-20	R33	366.699	16593.5	0.942073	14.7172	16.0158	0.636965	16.0757	0.0680188	1.38591	0.0862117	424.209	5.68989	500.425	63.5356	866.976	332.488	424.209	5.68989	51.0703	18.7761		424.209	6.71985
5	17-20	R33	83.8706	2220.55	0.440301	5.87421	30.7434	1.55425	30.9651	0.0662456	3.69947	0.119472	413.497	14.8169	952.183	191.889	2559.95	517.833	413.497	14.8169	83.8474	3.31825		413.497	15.2054
5	17-20	R33	269.692	6686.44	0.686109	9.2401	41.485	1.00752	41.5092	0.0675491	1.41681	0.0341324	421.373	5.7791	707.622	212.298	1769.72	766.167	421.373	5.7791	76.1898	10.3134		421.373	6.78326
5	17-20	R33	354.687	7646.36	0.833146	12.5577	22.5452	0.736947	22.6058	0.067148	1.65397	0.0731654	418.95	6.70892	560.622	97.4615	1187.92	446.606	418.95	6.70892	64.7326	13.271		418.95	7.58054
5	17-20	R33	438.609	12556.4	0.641966	15.8383	6.61878	0.579522	6.73733	0.0665986	1.25832	0.186769	415.631	5.06495	464.154	25.1006	712.867	140.646	415.631	5.06495	41.6959	11.5251		415.631	6.16024
5	17-20	R33	310.679	8516.61	0.745955	17.3114	12.5701	0.532378	12.6286	0.0668715	1.21421	0.0961475	417.28	4.90616	433.387	44.5564	520.852	276.066	417.28	4.90616	19.8851	42.4736		417.28	6.0384
6	17-39	R33	253.012	9456.15	0.62763	16.715	8.93321	0.547312	9.05634	0.0663787	1.48831	0.164339	414.301	5.97213	443.234	32.5295	597.29	193.584	414.301	5.97213	30.6364	22.5032		414.301	6.88216
6	17-39	R33	1443.19	48545	0.732309	17.9126	1.92936	0.518984	2.4109	0.067453	1.44569	0.599645	420.792	5.88904	424.473	8.36397	445.456	42.9302	420.792	5.88904	5.53678	9.19925		420.792	6.83656
6	17-39	R33	383.048	11299.3	0.631778	18.783	6.42644	0.49198	6.66104	0.0670503	1.75222	0.263055	418.36	7.0978	406.259	22.3035	338.999	145.539	418.36	7.0978	-23.4106	53.0241		418.36	7.89143
6	17-39	R33	102.158	3013.25	0.391675	15.7491	24.3226	0.575705	24.4761	0.0657873	2.73686	0.111818	410.725	10.8904	461.698	90.8628	724.861	517.606	410.725	10.8904	43.3373	40.4894		410.725	11.3984
6	17-39	R33	185.848	6706.89	0.659553	17.0979	9.67447	0.521246	9.80183	0.0646656	1.57494	0.160678	403.937	6.16654	425.984	34.1052	548.065	211.456	403.937	6.16654	26.2976	28.4583		403.937	7.01131
6	17-39	R33	218.451	4339.01	0.59423	17.8296	7.51872	0.507172	7.74077	0.0656124	1.84078	0.237803	409.668	7.30646	416.546	26.4504	455.81	166.932	409.668	7.30646	10.1231	32.9547		409.668	8.04976
6	17-39	R33	905.644	34152.2	0.69381	17.9598	3.03898	0.516851	3.42675	0.0673526	1.58342	0.462077	420.186	6.44112	423.046	11.856	439.607	67.6464	420.186	6.44112	4.41775	14.7809		420.186	7.31443
6	17-39	R33	192.506	5353.72	0.420979	16.8452	12.3283	0.53141	12.5065	0.0649524	2.10336	0.168182	405.673	8.26984	432.745	44.0729	580.461	268.026	405.673	8.26984	30.1118	32.302		405.673	8.91959
6	17-39	R33	284.284	3406.38	0.786469	19.142	16.3277	0.476421	16.4333	0.0661706	1.86054	0.113217	413.044	7.4438	395.615	53.8565	295.961	373.184	413.044	7.4438	-39.5602	175.993		413.044	8.18563
6	17-39	R33	991.041	12936.5	0.62279	18.4079	4.97118	0.50339	5.23431	0.0672353	1.63869	0.313067	419.478	6.65505	413.995	17.7964	384.501	111.669	419.478	6.65505	-9.09663	31.7317		419.478	7.50057
6	17-39	R33	264.664	8402.12	0.398903	17.2083	9.25394	0.525298	9.48653	0.065589	2.0878	0.220081	409.526	8.28417	428.685	33.1762	533.98	202.742	409.526	8.28417	23.3069	29.1602		409.526	8.94449
6	17-39	R33	72.3942	2395.67	0.412963	14.2759	15.7829	0.632118	16.1707	0.065477	3.52016	0.217688	408.848	13.9452	497.414	63.6131	929.756	324.492	408.848	13.9452	56.0263	15.4203		408.848	14.334
6	17-39	R33	114.209	3642.96	0.431113	16.2471	13.1157	0.552439	13.3075	0.0651251	2.25158	0.169196	406.719	8.87471	446.593	48.0926	658.471	281.49	406.719	8.87471	38.2329	26.4392		406.719	9.48491
6	17-39	R33	65.0158	2438.08	0.314225	13.3677	20.7172	0.671105	20.9828	0.0650933	3.32752	0.158584	406.526	13.1095	521.384	85.6124	1063.34	417.799	406.526	13.1095	61.7689	15.072		406.526	13.5204
6	17-39	R33	512.558	13609.9	0.652285	18.2175	5.13889	0.50709	5.3952	0.0670288	1.64317	0.304561	418.23	6.65404	416.491	18.433	407.818	115.021	418.23	6.65404	-2.55303	28.9701		418.23	7.49506
6	17-39	R33	85.0285	534.249	0.405125	23.9464	56.7182	0.367771	56.804	0.0639008	3.12045	0.0549337	399.304	12.082	318	155.389	NA	NA	399.304	12.082	NA	NA		399.304	12.5144
6	17-39	R33	66.9503	2488.78	0.371698	14.0379	21.8286	0.652253	22.1054	0.0664362	3.48777	0.157779	414.649	14.0067	509.864	88.6634	964.21	446.999	414.649	14.0067	56.996	19.9891		414.649	14.4046
6	17-39	R33	58.8439	1650.05	0.454845	15.3179	29.115	0.58854	29.6169	0.0654127	5.42898	0.183307	408.459	21.4873	469.935	111.528	783.457	614.695	408.459	21.4873	47.8645	40.997		408.459	21.715
[truncated: 1,547 more rows]

## Sheet: S4c Metadata
	Supplemental File S4c. Table of Analytical Parameters
[truncated: 54 more rows]
