# Supplementary material
Source: publisher figshare collection journal article supplement (https://gsapubs.figshare.com/articles/dataset/_/25505017)
Supplement: Supplementary file 2 [file 1]

Petersen Bay fault zone (PBFZ)

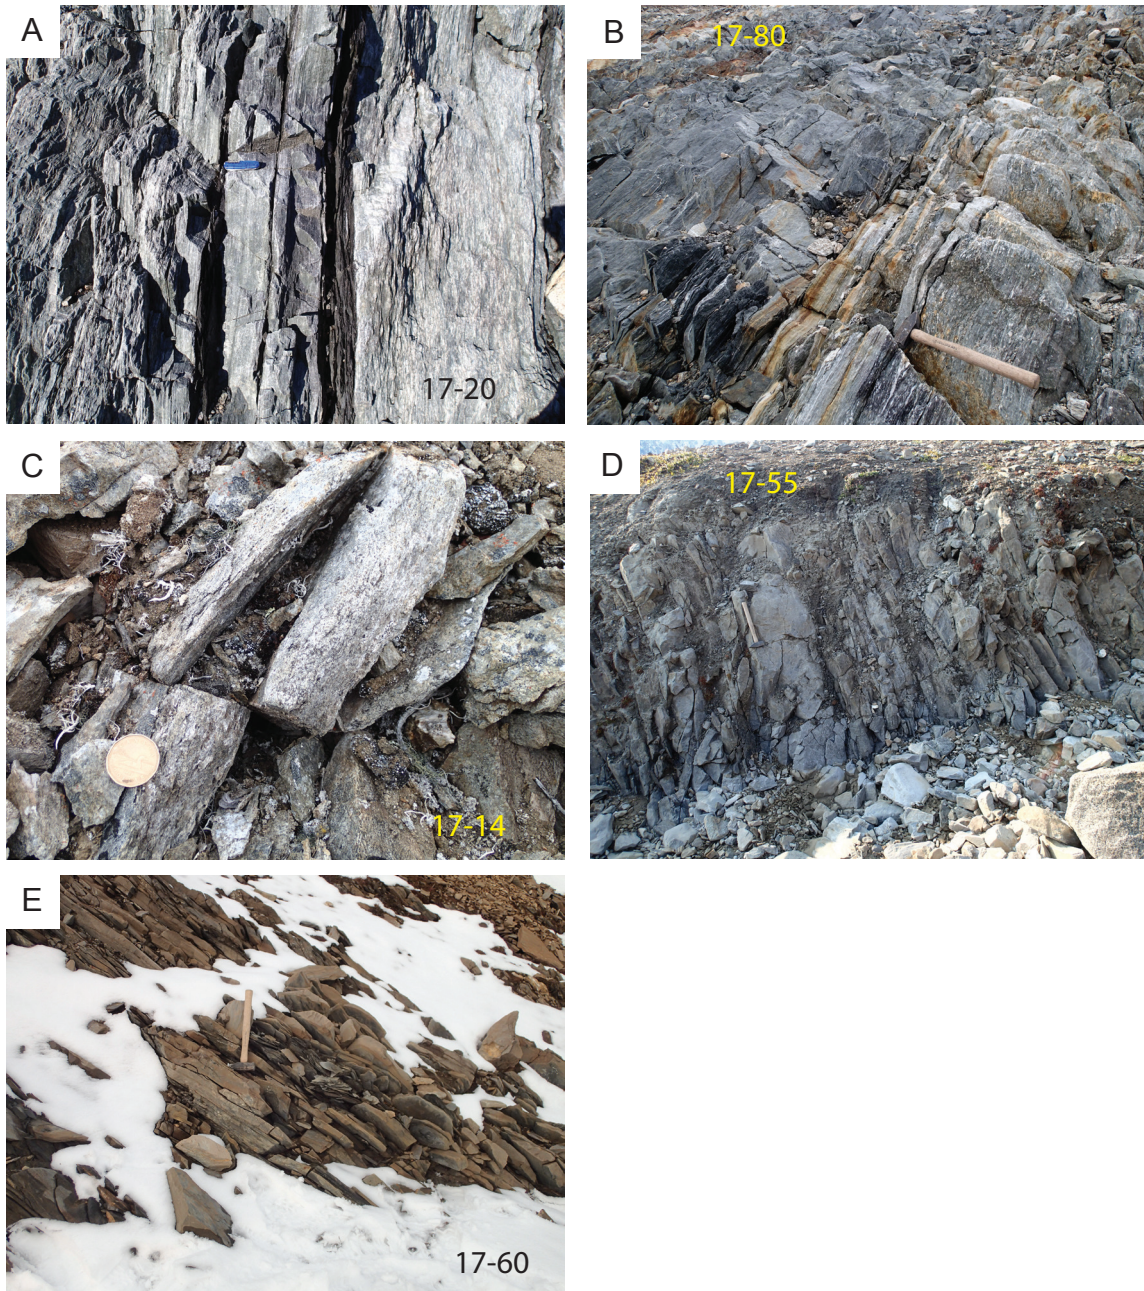

Supplemental File S7. Figure with additional outcrop photographs of samples collected in the Petersen Bay fault zone (PBFZ), Kulutingwak Fiord fault zone (KFFZ) and Emma Fiord fault zone (EFFZ). Scales in photos: Hammer = 39 cm; knife = 9 cm. PBFZ: (A) Inter-layered quartzite and paragneiss collected at sample 17-20; (B) Paragneiss collected at sample 17-80; (C) Felsic orthogneiss lens (sample 17-14) in mafic schist; (D) Interbedded metasandstone (sample 17-55) and metasilstone in a block of Danish River Formation; (E) Interlayered sandstone (17-60) and siltstone of the Danish River Formation.
