# Supplementary material
Source: publisher figshare collection journal article supplement (https://gsapubs.figshare.com/articles/dataset/_/25505017)
Supplement: Supplementary file 3 [file 1]

#### Petersen Bay fault zone

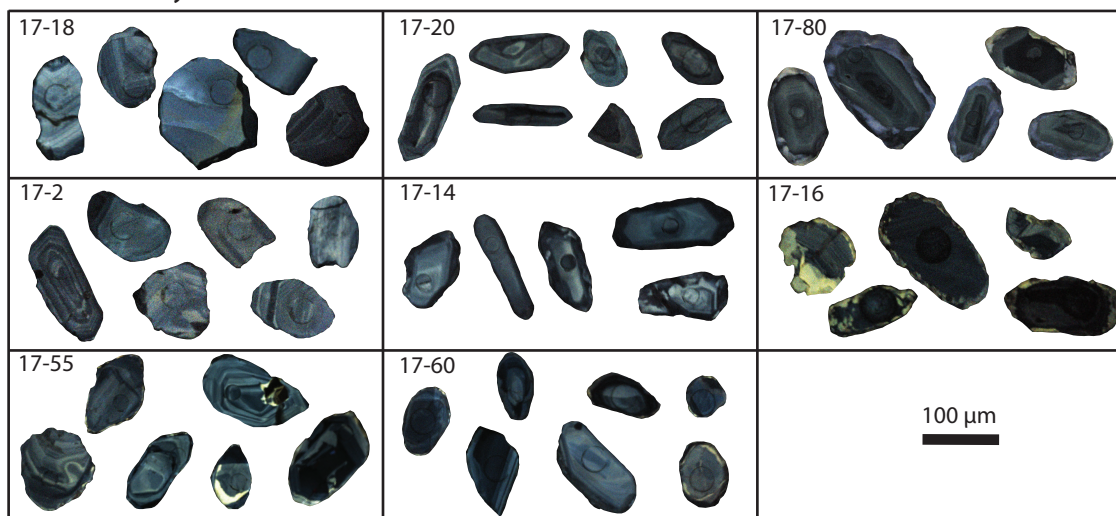

#### Kulutingwak Fiord fault zone

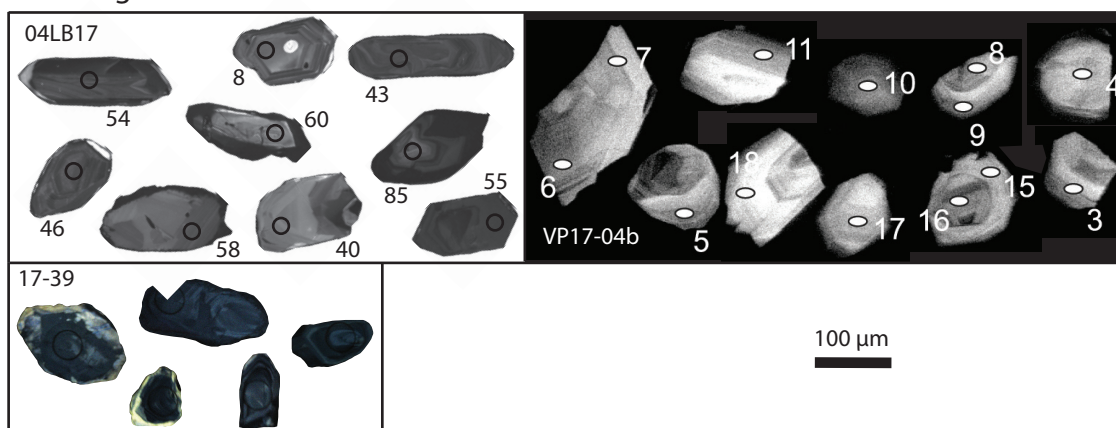

#### Emma Fiord fault zone

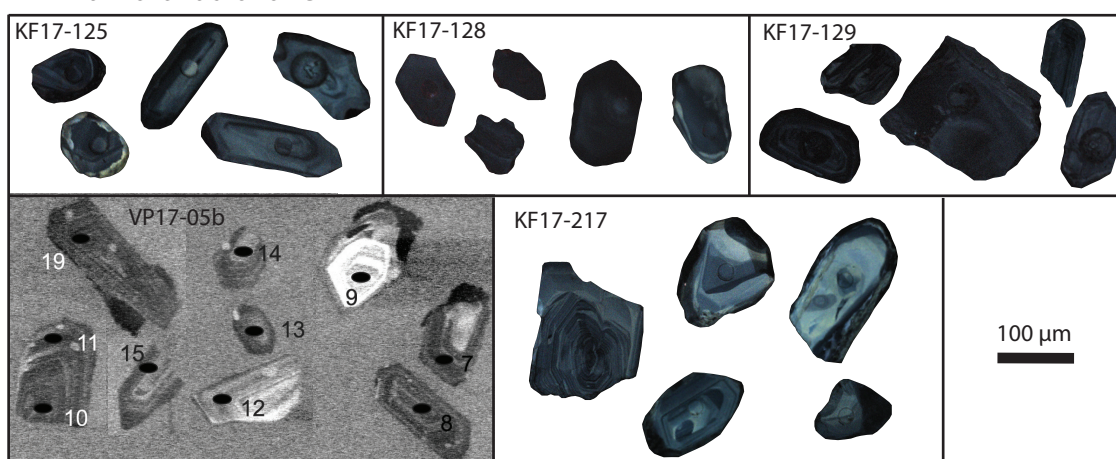

Supplemental File S3. Figure with representative cathodoluminescence (CL) images of analyzed igneous and detrital zircon grains. U-Pb analysis pits are 20 or 30  $\mu\text{m}$  in diameter; Lu-Hf analysis pits are 40  $\mu\text{m}$  in diameter and were placed on top of U-Pb analyses of known age.
